# Supplementary material for: Development of SSR markers and identification of major quantitative trait loci controlling shelling percentage in cultivated peanut (Arachis hypogaea L.)
Source: PubMed Central journal article supplement (PMC5511596; doi:10.1007/s00122-017-2915-3), 2017-05-15
Supplement: 122_2017_2915_MOESM1_ESM.pdf [file 122_2017_2915_MOESM1_ESM.pdf]

|               |    |    |   |   |   |  |   |   |   |    |
|---------------|----|----|---|---|---|--|---|---|---|----|
| AATAC/ATTGT   | 1  |    |   | 1 |   |  |   |   | 0 | 2  |
| AATAG/ATTCT   | 4  |    |   |   |   |  |   |   | 0 | 4  |
| AATAT/ATATT   | 29 | 13 | 7 | 3 | 2 |  | 2 |   | 0 | 56 |
| AATCC/ATTGG   | 4  | 1  |   |   |   |  |   |   | 0 | 5  |
| AATCT/AGATT   | 2  | 2  |   | 1 |   |  |   |   | 0 | 5  |
| AATGC/ATTGC   | 1  |    |   |   |   |  |   |   | 0 | 1  |
| AATGG/ATTCC   | 3  |    |   |   |   |  |   |   | 0 | 3  |
| AATTC/AATTG   | 33 | 7  |   | 1 |   |  |   |   | 0 | 41 |
| ACACC/GGTGT   | 2  |    |   |   |   |  |   |   | 0 | 2  |
| ACACT/AGTGT   | 1  |    |   |   |   |  |   |   | 0 | 1  |
| ACAGC/CTGTG   | 3  |    |   |   |   |  |   |   | 0 | 3  |
| ACATC/ATGTG   | 1  |    |   |   |   |  |   |   | 0 | 1  |
| ACCAT/ATGGT   | 3  | 1  |   |   |   |  |   |   | 0 | 4  |
| ACCCC/GGGGT   | 2  |    |   |   |   |  |   |   | 0 | 2  |
| ACCCG/CGGGT   | 2  |    |   |   |   |  |   |   | 0 | 2  |
| ACCCT/AGGGT   | 13 | 3  | 1 |   |   |  |   |   | 0 | 17 |
| ACCTC/AGGTG   | 2  |    |   |   |   |  |   |   | 0 | 2  |
| ACGTC/ACGTG   | 1  |    |   |   |   |  |   |   | 0 | 1  |
| ACTAT/AGTAT   | 2  |    |   |   |   |  |   |   | 0 | 2  |
| ACTCT/AGAGT   | 1  |    |   |   |   |  |   |   | 0 | 1  |
| AGAGG/CCTCT   | 2  |    | 1 | 1 |   |  |   |   | 0 | 4  |
| AGATG/ATCTC   | 3  | 3  |   |   |   |  |   |   | 0 | 6  |
| AGGCC/CCTGG   |    | 4  |   |   |   |  |   |   | 0 | 4  |
| ATATC/ATATG   | 5  | 3  | 1 |   |   |  |   |   | 0 | 9  |
| ATCCC/ATGGG   |    | 1  |   |   |   |  |   |   | 0 | 1  |
| ATCCG/ATCGG   | 13 |    |   |   |   |  |   |   | 0 | 13 |
| ATGCC/ATGGC   | 1  |    |   |   |   |  |   |   | 0 | 1  |
| CCCCG/CGGGG   | 6  |    |   |   |   |  |   |   | 0 | 6  |
| AAAAAC/GTTTTT | 4  | 2  |   |   |   |  |   |   | 0 | 6  |
| AAAAAG/CTTTTT | 31 | 10 | 3 |   | 1 |  |   | 1 | 0 | 46 |
| AAAAAT/ATTTTT | 50 | 12 | 1 | 1 |   |  | 1 |   | 0 | 65 |
| AAAACC/GGTTTT | 2  |    |   |   |   |  |   |   | 0 | 2  |
| AAAAGT/ACTTTT | 1  |    |   |   |   |  |   |   | 0 | 1  |
| AAAATC/ATTTTG | 8  | 4  | 1 | 1 |   |  |   |   | 0 | 14 |
| AAAATG/ATTTTC | 3  |    | 1 |   |   |  |   |   | 0 | 4  |

|               |    |   |   |   |  |   |   |   |    |    |
|---------------|----|---|---|---|--|---|---|---|----|----|
| AAAATT/AATTTT | 11 | 3 | 1 |   |  |   |   | 0 | 15 |    |
| AAACAC/GTGTTT | 4  |   |   |   |  |   |   | 0 | 4  |    |
| AAACAG/CTGTTT | 1  |   |   |   |  |   |   | 0 | 1  |    |
| AAACAT/ATGTTT |    | 2 |   |   |  |   |   | 0 | 2  |    |
| AAAGAG/CTCTTT | 11 | 2 | 1 |   |  |   | 1 | 0 | 15 |    |
| AAAGAT/ATCTTT | 8  | 3 | 1 |   |  |   |   | 0 | 12 |    |
| AAAGCC/CTTTGG | 1  |   |   |   |  |   |   | 0 | 1  |    |
| AAAGGG/CCCTTT | 2  | 1 |   |   |  |   |   | 0 | 3  |    |
| AAAGTG/ACTTTC | 1  |   |   |   |  |   |   | 0 | 1  |    |
| AAATAC/ATTTGT | 1  |   |   |   |  |   |   | 0 | 1  |    |
| AAATAT/ATATTT | 4  | 1 |   |   |  |   |   | 0 | 5  |    |
| AAATCC/ATTTGG | 4  |   |   |   |  |   |   | 0 | 4  |    |
| AAATGG/ATTTCC | 1  |   |   |   |  |   |   | 0 | 1  |    |
| AAATTC/AATTTG | 2  | 1 |   |   |  |   |   | 0 | 3  |    |
| AAATTG/AATTTT |    | 2 | 1 |   |  |   |   | 0 | 3  |    |
| AAATTT/AAATTT | 3  |   |   |   |  |   |   | 0 | 3  |    |
| AACAAG/CTTGTT | 3  | 2 | 1 |   |  |   |   | 0 | 6  |    |
| AACAAT/ATTGTT | 13 | 3 | 3 | 2 |  |   |   | 0 | 21 |    |
| AACACC/GGTGTT | 18 | 6 | 2 |   |  | 1 |   | 1 | 0  | 28 |
| AACACT/AGTGTT |    |   | 1 |   |  |   |   | 0 | 1  |    |
| AACAGC/CTGTTG |    |   |   | 1 |  |   |   | 0 | 1  |    |
| AACAGG/CCTGTT |    | 1 |   |   |  |   |   | 0 | 1  |    |
| AACAGT/ACTGTT | 1  |   |   |   |  |   |   | 0 | 1  |    |
| AACATC/ATGTTG | 3  |   |   |   |  |   |   | 0 | 3  |    |
| AACATG/ATGTTC | 2  |   |   |   |  |   |   | 0 | 2  |    |
| AACCAC/GGTTGT | 1  |   |   |   |  |   |   | 0 | 1  |    |
| AACCAG/CTGGTT | 2  |   |   |   |  |   |   | 0 | 2  |    |
| AACCAT/ATGGTT | 1  |   | 1 |   |  |   |   | 0 | 2  |    |
| AACCCT/AGGGTT | 2  | 1 |   |   |  |   |   | 0 | 3  |    |
| AACCGC/CGGTTG | 1  |   |   |   |  |   |   | 0 | 1  |    |
| AACGAG/CGTTCT | 1  |   |   |   |  |   |   | 0 | 1  |    |
| AACGCC/CGTTGG | 1  |   |   |   |  |   |   | 0 | 1  |    |
| AACGTC/ACGTTG | 1  |   |   |   |  |   |   | 0 | 1  |    |
| AACTAG/AGTTCT | 1  |   |   |   |  |   |   | 0 | 1  |    |
| AACTAT/AGTTAT | 2  |   | 1 |   |  |   |   | 0 | 3  |    |
