# Supplementary material for: Development of SSR markers and identification of major quantitative trait loci controlling shelling percentage in cultivated peanut (Arachis hypogaea L.)
Source: PubMed Central journal article supplement (PMC5511596; doi:10.1007/s00122-017-2915-3), 2017-05-15
Supplement: 122_2017_2915_MOESM3_ESM.pdf [file 122_2017_2915_MOESM3_ESM.pdf]

**Table S3 The 2,240 newly developed markers used in the genotyping of the RIL population.**

| ID         | Chromosome | SSR_start | SSR_end  | FORWARD PRIMER (5'-3')      | REVERSE PRIMER (5'-3')      | Bands in parents | Polymorphism in RILs |
|------------|------------|-----------|----------|-----------------------------|-----------------------------|------------------|----------------------|
| Ad01A846   | Aradu.A01  | 2175892   | 2176037  | TCCATTCAAAGGACCAAAAAGA      | TCACTCAACTCAGCGTGTAGC       | 1                |                      |
| Ad01A992   | Aradu.A01  | 2520559   | 2520662  | TCAAACGGTTCCTCTTCGTT        | GGAAGAAGAACGTGCAACAA        | 1                |                      |
| Ad01A1077  | Aradu.A01  | 2771612   | 2771699  | CGAAACCGTCCCTCATCTAA        | TTGGTTGGTGTGATGCAGAT        | 1                |                      |
| Ad01A1445  | Aradu.A01  | 3687459   | 3687572  | AACGTGTCACCAAACTTATCAAA     | AGGATGTCGCAAGATGAGAAA       | 1                |                      |
| Ad01A2869  | Aradu.A01  | 7389544   | 7389673  | TTAGGAACTATTTTCGATAGACAAAAA | CAGAAAGCTGGTTCTCCTTCA       | 1                |                      |
| Ad01A3018  | Aradu.A01  | 7770616   | 7770739  | CAAATTCAGGACCAAAAATTCA      | TCCCCAACCTCTCACCTAAA        | 1                |                      |
| Ad01A3104  | Aradu.A01  | 8005930   | 8006009  | TTTGTCCCTCTTGGAGGTTG        | AAAATTGAGGTGGCAAGGTG        | 2                |                      |
| Ad01A3185  | Aradu.A01  | 8318712   | 8318804  | TGTGCTAAGCTGTCTCCTGC        | AACAAGCGGCGAATAAAGAA        | 1                |                      |
| Ad01A4177  | Aradu.A01  | 11176754  | 11176839 | CAAGTTAAGGATGCGTTTATTTTT    | GCAGATCTCCCAAAGAGTTG        | 1                |                      |
| Ad01A4291  | Aradu.A01  | 11452742  | 11452838 | TAGGTTGTTGAGTTGGGGG         | GAAAATATTAGAGGTGAATTTGTCCC  | 1                |                      |
| Ad01A5090  | Aradu.A01  | 14569715  | 14569854 | GAAGCTCTGCCACAATCACA        | GCGAATGTAGATAGAATAGGGAATG   | 1                |                      |
| Ad01A5132  | Aradu.A01  | 14841047  | 14841224 | AGGGCTGCACCAATAACAAC        | GCTATGCATGCACCGAAAT         | 1                |                      |
| Ad01A5465  | Aradu.A01  | 16367057  | 16367180 | TTCTCCATCAAGCCTTTTTGA       | CGCTAGGCATCTGGAGTTTC        | 1                |                      |
| Ad01A8152  | Aradu.A01  | 33665408  | 33665488 | GCTTCACGTGTGTAATTCCG        | TGGTGCTTCATACGCCAATA        | 2                | Yes                  |
| Ad01A8169  | Aradu.A01  | 33746595  | 33746691 | TGTCACGATTA AAAAGTTTCGG     | TGGTAATTTTGCAGCATTATCTGT    | 2                | Yes                  |
| Ad01A8429  | Aradu.A01  | 35519808  | 35519887 | TCATTCCCATTGGGTTTCAT        | TCTCTCTTTTTTCGAAATTCAT      | 1                |                      |
| Ad01A8451  | Aradu.A01  | 35610051  | 35610149 | CGAATACACACCCATCTCCC        | CTAGAGGTTTCTCCGGCCTT        | 1                |                      |
| Ad01A9058  | Aradu.A01  | 39328275  | 39328378 | GGGCGTGCTTTTTGTGCTTA        | CATGGGACGGTAACTGAGAC        | 2                |                      |
| Ad01A9785  | Aradu.A01  | 44728022  | 44728135 | TTCAAATACTTCTCCTCCTCA       | GAGTGTAGGTTTCATCCTCTTCCA    | 1                |                      |
| Ad01A9853  | Aradu.A01  | 45218940  | 45219032 | TGAGTGAGAGAGAGGGGAAG        | CTCCTATCTTTCTTTTCCCCTT      | 1                |                      |
| Ad01A9910  | Aradu.A01  | 45652824  | 45652940 | TCATTACAAGTATTCCGTCAAAAA    | AAACATCAATATCGAGGAACCAA     | 2                |                      |
| Ad01A11177 | Aradu.A01  | 55686937  | 55687030 | CTCCCATGTCATCGAGTCCT        | AGCTTGCGGATGTTGGTATC        | 1                |                      |
| Ad01A11348 | Aradu.A01  | 56963494  | 56963574 | CCAAAACGGTTTAGTCGTGA        | CACAATTCAAATTTCTCCAGCA      | 2                | Yes                  |
| Ad01A11768 | Aradu.A01  | 60142926  | 60143143 | TTGGGGGACATTTATGTTTTG       | CAGATAACAGCGTACAGAAAGGA     | 0                |                      |
| Ad01A11805 | Aradu.A01  | 60442880  | 60442973 | TTACCCACTCATCAGTCACCA       | CGACGATAACGATAATGACGA       | 1                |                      |
| Ad01A12246 | Aradu.A01  | 63586308  | 63586444 | TGATTCCGTTATCATTTGTTGTTG    | CAGAAGCACAAGCTGAACCA        | 1                |                      |
| Ad01A12247 | Aradu.A01  | 63587471  | 63587597 | GGTGGTGGTGGTAGGTTCTG        | ACCACCGCCATTATCATCA         | 1                |                      |
| Ad01A12382 | Aradu.A01  | 65046955  | 65047092 | CTTTTCGTGATCCAGCCTTT        | GGTGCCAGCTTAGGGACTTT        | 1                |                      |
| Ad01A13053 | Aradu.A01  | 70963487  | 70963665 | ACTTCCTTAATGGCCTTCGG        | GCAGGTAACCTGGCATTGGAT       | 0                |                      |
| Ad01A14236 | Aradu.A01  | 80091650  | 80091748 | TCTAATTTATTCTTCTTTCAATGGT   | AAAACACTTTTTAAGATACGGTAATCA | 0                |                      |
| Ad01A15327 | Aradu.A01  | 88794602  | 88794706 | CAAAAATCAATAACAAGATTAGGGA   | CCATTGTAAACACCCCTAGCA       | 1                |                      |
| Ad01A15556 | Aradu.A01  | 89591196  | 89591346 | TCACAGACCTTTTGACACCG        | AGCTCAATCTTCAGCTCGGA        | 1                |                      |

| ID         | Chromosome | SSR_start | SSR_end   | FORWARD PRIMER (5'-3')   | REVERSE PRIMER (5'-3')     | Bands in parents | Polymorphism in RILs |
|------------|------------|-----------|-----------|--------------------------|----------------------------|------------------|----------------------|
| Ad01A15758 | Aradu.A01  | 90281111  | 90281212  | TTTTTGGTTGTAGCCCTTCTTC   | GAGGGTTGTCCAATCCATCT       | 2                |                      |
| Ad01A15941 | Aradu.A01  | 90937449  | 90937560  | GCCTCTTGTTCCCTTGTCGTC    | TGACCTCCTTTAGCCTCGAC       | 1                |                      |
| Ad01A18005 | Aradu.A01  | 96817750  | 96817832  | TGCTATTTTCTTCCCTTGCG     | CCACCTAGCCACTACCTCCA       | 1                |                      |
| Ad01A18469 | Aradu.A01  | 98713715  | 98713861  | TGATGAAATTTGTTGTTGCTGA   | ATCAACAGAAGCCCAAGCTG       | 1                |                      |
| Ad01A18925 | Aradu.A01  | 100161822 | 100161978 | TCCATGTAACCATGTAACCAAGTT | AAGGAGGAGAAGGAGGAACG       | 1                |                      |
| Ad01A18976 | Aradu.A01  | 100304199 | 100304348 | TTTTGCCTAAATTGCTTGGC     | TGTTAGAATTGTTGGCATGGA      | 2                |                      |
| Ad01A19145 | Aradu.A01  | 100818178 | 100818262 | GTACGCTTTTAATTTGCGGG     | AATAAAGCTAGGGAGGCGCT       | 1                |                      |
| Ad01A19585 | Aradu.A01  | 102281317 | 102281474 | ACCACCCGTTCTTCTTCCAT     | CTTAAGAATTCCAATGGCGG       | 1                |                      |
| Ad01A19715 | Aradu.A01  | 102627202 | 102627305 | ACCAGCACCTTCTTGCTTTC     | GTTCTCCAAGGAACGGAGG        | 1                |                      |
| Ad01A19990 | Aradu.A01  | 103326847 | 103326931 | GAGAAGAAGAGATGCGGACG     | CGGTGCTGGTAACAAACAAA       | 1                |                      |
| Ad01A20390 | Aradu.A01  | 104545253 | 104545355 | GGCGAGATTTCGAATTTTATTCT  | CCTCAAGAATCACAACCACG       | 1                |                      |
| Ad01A20947 | Aradu.A01  | 106358335 | 106358501 | CTAATCCCCAAAATTCGCTG     | CACGTAAATGAAAAATGAAGAAGG   | 1                |                      |
| Ad02A180   | Aradu.A02  | 390520    | 390665    | TTTATTAACACGCGCACCAA     | GAAGGTGCAGCAAGAAGAAGA      | 2                | Yes                  |
| Ad02A182   | Aradu.A02  | 391137    | 391251    | TTTATTAACACGCGCACCAA     | CGTGCAGAAACGAAAGAAAA       | 2                | Yes                  |
| Ad02A625   | Aradu.A02  | 1484425   | 1484506   | ATCCAATCCCCAACATTCA      | AAGAACAGCCATGGTAACGG       | 2                | Yes                  |
| Ad02A725   | Aradu.A02  | 1796747   | 1796867   | CGTTCAGATTTCTGTCACGGT    | TTTGTTAAGTTTGGTTGGGGA      | 0                |                      |
| Ad02A1293  | Aradu.A02  | 3486294   | 3486377   | TTGTTCTTAGAGGCCTTTGTATGA | AAGCATGCTCATACCCATTG       | 1                |                      |
| Ad02A1798  | Aradu.A02  | 4715862   | 4716036   | TTCCGTTAAACATGACAGCC     | AAATGATTTCAACCTTAAATTTGTTG | 0                |                      |
| Ad02A2779  | Aradu.A02  | 7335579   | 7335686   | TCCTCCTTTTCCTCCTCCTC     | TTTCATTCTGAACCTCAA         | 1                |                      |
| Ad02A3952  | Aradu.A02  | 10995133  | 10995239  | CTGCCCCATGGAACCTATTA     | TGAGCGACGTAGTGACGAAC       | 1                |                      |
| Ad02A4008  | Aradu.A02  | 11167140  | 11167239  | TTCCAGAACCCCACCACTAC     | TGCCATCAATAATGGTTCTTCTT    | 1                |                      |
| Ad02A4133  | Aradu.A02  | 11690140  | 11690244  | GTTGGAGTCATTGACCGTT      | CGTTTTCAATCAAAGACGA        | 2                | Yes                  |
| Ad02A4136  | Aradu.A02  | 11700071  | 11700169  | TCCGTTCAATGTTGGAGTCA     | GCGCTTTCAATCAAAGACA        | 2                | Yes                  |
| Ad02A4471  | Aradu.A02  | 13020767  | 13020958  | CAACTTTTCAAATCACGCTCC    | GGAGGAGAAGGAGGAGAAGAA      | 1                |                      |
| Ad02A5154  | Aradu.A02  | 15853650  | 15853793  | CAACATAGCAAGTACAAGATCGG  | GTCAACGTCCCCAACATTTT       | 1                |                      |
| Ad02A5473  | Aradu.A02  | 17643624  | 17643776  | AGTTTTGCTCATCTGGAGC      | CTGAATCCCTCTCTCCCTCC       | 1                |                      |
| Ad02A5615  | Aradu.A02  | 18485176  | 18485302  | GTAGATCCGGAGGAGACGC      | GTGAACCTGCCGGTTTTAGA       | 2                |                      |
| Ad02A5633  | Aradu.A02  | 18564280  | 18564388  | GGCAGCACTAACACCCATTT     | GATTCGGTTGTTTCGCTTTC       | 2                |                      |
| Ad02A5661  | Aradu.A02  | 18761806  | 18761898  | TCAGATTGATGCGAGGACAG     | TTATCGTTGCCTGCAGTCTC       | 2                |                      |
| Ad02A5780  | Aradu.A02  | 19721178  | 19721267  | CGTGAGCTCCTTCTCTCTCC     | GAGGAGCCTGTCCAACCTCAC      | 2                |                      |
| Ad02A5805  | Aradu.A02  | 19875171  | 19875256  | AGAAGGAGGAGAGGGAGACG     | AACCCTCTTACACAGCCAC        | 1                |                      |
| Ad02A5861  | Aradu.A02  | 20144959  | 20145087  | GCCGGCAACTTCTTAAGTGA     | TTTGGGATAACATTAGCAGGG      | 1                |                      |
| Ad02A5972  | Aradu.A02  | 20788408  | 20788550  | GTCTGGATACCTGAGGCGAA     | GCTCCTAACTCAGCCTGCAA       | 1                |                      |

| ID         | Chromosome | SSR_start | SSR_end  | FORWARD PRIMER (5'-3')   | REVERSE PRIMER (5'-3')      | Bands in parents | Polymorphism in RILs |
|------------|------------|-----------|----------|--------------------------|-----------------------------|------------------|----------------------|
| Ad02A5993  | Aradu.A02  | 20910626  | 20910731 | GCTAAGCCATGTTTCTTTTCC    | TCCCTCATAAACTTGTGATTGC      | 1                |                      |
| Ad02A6022  | Aradu.A02  | 21021831  | 21021978 | TCCCTCACTTTATCACGTTGAA   | ATCAAACAGAAGCAGCAGCA        | 2                |                      |
| Ad02A6152  | Aradu.A02  | 21993386  | 21993481 | TTGTGCGGCCATATCATAAA     | TGTTTCATCCAATATAAGTGCCC     | 1                |                      |
| Ad02A6275  | Aradu.A02  | 22609420  | 22609522 | TTTTGGGAACAACAATAACAACA  | CCACAATTTTCAGTTTTTCAGATCC   | 1                |                      |
| Ad02A6357  | Aradu.A02  | 23185728  | 23185856 | GGATGGGAAGTAGCCATTGA     | CCTGACTCAGCCTACGAAGC        | 1                |                      |
| Ad02A6382  | Aradu.A02  | 23441584  | 23441705 | GGTTGTTTTTTGGAGAAACAGGT  | CCAAAAGCGAAAACAGGAAA        | 1                |                      |
| Ad02A6403  | Aradu.A02  | 23581551  | 23581737 | GGAAAACAACCTTTATAAGGGAAA | TGATCTATCATCGTACCTGTTGG     | 1                |                      |
| Ad02A6461  | Aradu.A02  | 23984924  | 23985041 | GACCTTGGCCTTATCGTTGA     | TGAAAAATTA AAAACATTGGAAGGA  | 1                |                      |
| Ad02A6531  | Aradu.A02  | 24473990  | 24474109 | AACGAATAAACCCCAAAAACG    | CGTGCAAGAAGAAGAAGAACG       | 1                |                      |
| Ad02A7015  | Aradu.A02  | 28414221  | 28414322 | CGACGACGATGATGATGATT     | GCAGAAGAACAACAACAATGGA      | 1                |                      |
| Ad02A7027  | Aradu.A02  | 28465278  | 28465358 | TACCTTGGCCGAACCTACAC     | CTAGAGGATTCTCCGGCCTT        | 1                |                      |
| Ad02A7118  | Aradu.A02  | 29034904  | 29034984 | CGAATTGCTCTGATGCCATA     | AACCCGGTTTACTGAGCCTT        | 1                |                      |
| Ad02A7541  | Aradu.A02  | 32623347  | 32623484 | CTAGTCGGCCTAAACTCCCC     | TCTAGCCGTAAACCGAAGGA        | 1                |                      |
| Ad02A8048  | Aradu.A02  | 37363500  | 37363589 | TGAAGCTTTGAAGTCCAAATTA   | GGTTTGGGTTAGGATATGACCA      | 1                |                      |
| Ad02A8360  | Aradu.A02  | 40154423  | 40154557 | GGCGATAGCTAAGACCTCCC     | CCCCAAAAGAAAACCTAGCC        | 0                |                      |
| Ad02A8999  | Aradu.A02  | 45880197  | 45880310 | TGAAAACATAAAACCCACCTT    | AGATCGACAGCTCAGGGTGA        | 1                |                      |
| Ad02A9441  | Aradu.A02  | 49451592  | 49451766 | TTGTTGCTGCTGAATTTGTTG    | TTCTCCCTTCAACCCAAAAT        | 1                |                      |
| Ad02A10033 | Aradu.A02  | 54389931  | 54390061 | AAACGCAAAATCATTCTCCC     | AAGGAAGGGGAGAGAGAGGG        | 0                |                      |
| Ad02A10118 | Aradu.A02  | 55064099  | 55064181 | TCCAGATGCTTACACGTCA      | ATGGAGGATGTGAGTGGGAA        | 1                |                      |
| Ad02A10228 | Aradu.A02  | 56086726  | 56086855 | TCCCTCTTCTTTTCTTCTCCTC   | TCCCTCTCTCCTTCTCTCCC        | 1                |                      |
| Ad02A10600 | Aradu.A02  | 58620569  | 58620691 | TTGATGGTATTTCTGTGAGTGA   | GCAGTCGTTTTCAACCCCTA        | 2                | Yes                  |
| Ad02A11078 | Aradu.A02  | 62082831  | 62082975 | AGAAAGAACGGGGATTTCAG     | CGTCATCCTCATCAAAACCC        | 0                |                      |
| Ad02A11079 | Aradu.A02  | 62083122  | 62083240 | GTGTGATGGATGGTGTGATGA    | GGACCAAAATGCCCTATCT         | 1                |                      |
| Ad02A11285 | Aradu.A02  | 63609785  | 63609892 | CCAACAATTGGATGACCACA     | TTCTCGGGTTTCAATCAACC        | 1                |                      |
| Ad02A11943 | Aradu.A02  | 67828727  | 67828822 | GAGGAAGAAGAACGTGCAGC     | CGCGCACTAACTATTTTGA         | 1                |                      |
| Ad02A12178 | Aradu.A02  | 69056490  | 69056672 | TTTAAAATCAAGAAGCCATCCA   | TCTTGGCCAGTAAGCAATC         | 0                |                      |
| Ad02A12699 | Aradu.A02  | 72003226  | 72003345 | CAGAAGCAGAAGCAACCAGA     | GAGGAAAGAACAGGGGAAGG        | 1                |                      |
| Ad02A12962 | Aradu.A02  | 73499174  | 73499286 | TCTTCTTCTCCCAACCAATGA    | CGACGAGGACAATGATGATG        | 2                | Yes                  |
| Ad02A13620 | Aradu.A02  | 76565631  | 76565714 | GGATTTTACAGTTCGCCTT      | GTTATGCGGAGAGAAAGCCA        | 1                |                      |
| Ad02A14109 | Aradu.A02  | 78566526  | 78566660 | TCATCATCATCAAGAACCAGA    | TTTCGCTACAAAATGGTCCC        | 1                |                      |
| Ad02A14679 | Aradu.A02  | 80553852  | 80553969 | TGCATTTCTAAGAGAGAGGACAT  | GGTAGTTATGTTACAAATGCTGTGCG  | 0                |                      |
| Ad02A15088 | Aradu.A02  | 82175600  | 82175689 | AGAGAAGAGAAGGAGTGGGAAG   | ACCCAGTTATTTTCTCCCG         | 1                |                      |
| Ad02A16352 | Aradu.A02  | 85889136  | 85889285 | CATTGTTTGTGACAGGTTGGA    | TGAGTTCATAAGTTTCATTTCAGAAAT | 1                |                      |

| ID         | Chromosome | SSR_start | SSR_end  | FORWARD PRIMER (5'-3')      | REVERSE PRIMER (5'-3')    | Bands in parents | Polymorphism in RILs |
|------------|------------|-----------|----------|-----------------------------|---------------------------|------------------|----------------------|
| Ad02A16537 | Aradu.A02  | 86400202  | 86400325 | ATTCGGGGTTGAGCAATATG        | TGTGTGTTAAAGTTTTAAGGGGAAA | 1                |                      |
| Ad02A16566 | Aradu.A02  | 86509261  | 86509393 | CCGTTTTTCATTGATTGAATTG      | GTGGTTGGTGTGCGAGTATG      | 1                |                      |
| Ad02A16744 | Aradu.A02  | 87131648  | 87131761 | CGATAACATCTTTGTGTATTGACTCTC | TTAGCGGTAATCATGTTTAGAATGT | 2                | Yes                  |
| Ad02A17025 | Aradu.A02  | 87868855  | 87869004 | CGGTGTGCAGGTGTGAATTA        | TTTGGGTTCCCACTCTTTTG      | 1                |                      |
| Ad02A17359 | Aradu.A02  | 88764798  | 88764881 | TGTTGTTGATGTTGCCTTTGT       | CAGTAGCAGCAAGAGCAAAAA     | 0                |                      |
| Ad02A17360 | Aradu.A02  | 88765427  | 88765540 | TGCTGCTGTTATTATTGCTGCT      | CAACACCACCACCACCAAC       | 2                |                      |
| Ad02A17668 | Aradu.A02  | 89490173  | 89490286 | GGCCGTAATGTTTAGAAGTCG       | AAAGCACATTCATGGAAGACG     | 1                |                      |
| Ad02A18080 | Aradu.A02  | 90360631  | 90360738 | CCCATCACTCTGGATCTTCAA       | CTGCCTTTCTCTTCATCGCT      | 1                |                      |
| Ad02A18108 | Aradu.A02  | 90435197  | 90435277 | TTGCTGTCTACAACAGTGTGGAT     | TTGTGTGGAGAATGTTTAAGGTTT  | 1                |                      |
| Ad02A18256 | Aradu.A02  | 90815378  | 90815547 | TCGTTCGAACCAAAATACCA        | GCTTCTGCTTCATTATTGTTGCT   | 2                |                      |
| Ad02A19070 | Aradu.A02  | 92685023  | 92685113 | AGAGGAAAGTGGTGGAGGGT        | AAACACCCAAAAGAAAGGGG      | 1                |                      |
| Ad02A19283 | Aradu.A02  | 93057512  | 93057611 | AACAGCAACATCCTGCAATTT       | ACATCGTGCTGAGTGGAAATG     | 1                |                      |
| Ad02A19370 | Aradu.A02  | 93213837  | 93213969 | GGGAATACTGAGAGATCATCAAGG    | GGGAAGAACTGTTGGTGGAA      | 1                |                      |
| Ad02A19420 | Aradu.A02  | 93299024  | 93299111 | AAGAACAACGACGGAGAACG        | TGCAGTCCGTGAAAGTAACG      | 1                |                      |
| Ad02A19426 | Aradu.A02  | 93322702  | 93322784 | ATAAATGGCCACGTTGCTTC        | GATGACGGTGGAGAGACGAT      | 1                |                      |
| Ad02A19543 | Aradu.A02  | 93507836  | 93507929 | TTTGACAGAAGTGATAATGTTTGA    | GTTTTTGCACAGAAAAATTGAA    | 1                |                      |
| Ad03A41    | Aradu.A03  | 118939    | 119063   | ATTCGAGAAAATGGAAGGGG        | TGAAAGATAGGTTTCGGTGGA     | 1                |                      |
| Ad03A562   | Aradu.A03  | 1328208   | 1328288  | CAAATCCCCGACACCTCCTA        | GCGTTTTTGTGTAATTGGGA      | 2                |                      |
| Ad03A963   | Aradu.A03  | 2149018   | 2149121  | GGATCCAAGTGAGGCACATT        | TCACTGAGTTCGTTTCGTTTCG    | 1                |                      |
| Ad03A1878  | Aradu.A03  | 4319448   | 4319542  | TTGGTGTGAGCAAGAAGTGG        | TTGTTGCCCTTAAACAACC       | 0                |                      |
| Ad03A1892  | Aradu.A03  | 4347479   | 4347576  | TCGCAAAATAAGGCTGTTGA        | TTTTTCTTTCCGCCCTCTTT      | 1                |                      |
| Ad03A2070  | Aradu.A03  | 4765967   | 4766048  | CTCCTCTCTCTCGCTGCTGT        | TTATTTTACCCTTCCACCG       | 1                |                      |
| Ad03A2104  | Aradu.A03  | 4819163   | 4819252  | CAGTGGCGACTGAGTGTGTT        | AATGCATCAATCTTCCATGA      | 1                |                      |
| Ad03A2259  | Aradu.A03  | 5224171   | 5224279  | ACGACGCAAGGAGTTTATGC        | ATTCGTCTCCGAAATTGCC       | 2                |                      |
| Ad03A3140  | Aradu.A03  | 7565825   | 7565942  | TCCTCATCAGAACCAGAGC         | GCCCTTGCCCTCTCTAGAAC      | 1                |                      |
| Ad03A3492  | Aradu.A03  | 8635500   | 8635600  | CCAACTCCAAATCCTCCAA         | GGCTGATTTTGACAAGGGAA      | 1                |                      |
| Ad03A3828  | Aradu.A03  | 9690664   | 9690769  | TGGCTTGAGCATGATTATCG        | ATTTCCGTCCATCCATACCA      | 1                |                      |
| Ad03A4482  | Aradu.A03  | 10812434  | 10812525 | CCAACAGGGGAACAGCTAGA        | CCCCATTGGCACTACATTTT      | 1                |                      |
| Ad03A4665  | Aradu.A03  | 11649228  | 11649327 | GACGATGAAAAAGACGCTCC        | GCAATTTTAGATCACGCTTT      | 1                |                      |
| Ad03A5081  | Aradu.A03  | 12864640  | 12864741 | AATGCCCGAGTTAGGCTATG        | TGGTTGGTGTTTAAGTGGTCA     | 1                |                      |
| Ad03A5364  | Aradu.A03  | 13766648  | 13766760 | CTAAGCTCCATAACCGAGCG        | CGCCAACCATCATTTTCAGT      | 1                |                      |
| Ad03A5583  | Aradu.A03  | 14443691  | 14443791 | CGTACAGAGTCGACAGAGAGAGG     | GCTGCATATCCAAGATCAAGC     | 1                |                      |
| Ad03A5767  | Aradu.A03  | 15600355  | 15600443 | GGTTCGTCTGTTGGTGGTCGT       | TTTTTCGCTCCAAAATGGTC      | 1                |                      |

| ID         | Chromosome | SSR_start | SSR_end   | FORWARD PRIMER (5'-3')   | REVERSE PRIMER (5'-3')      | Bands in parents | Polymorphism in RILs |
|------------|------------|-----------|-----------|--------------------------|-----------------------------|------------------|----------------------|
| Ad03A5829  | Aradu.A03  | 15815002  | 15815132  | CTCTCCCCTTCCCCTCTT       | GGAGGGAGAGAGAGCAAAGAA       | 1                |                      |
| Ad03A5941  | Aradu.A03  | 16446064  | 16446239  | TTTCTCCTCATCTTCTGCTGC    | CAAGTGCTACACTCAAACCGG       | 1                |                      |
| Ad03A6363  | Aradu.A03  | 17940338  | 17940429  | CATCCATGATTCAAAACACACA   | TTTGCCAACCTTCTTCTGCT        | 1                |                      |
| Ad03A6716  | Aradu.A03  | 19202841  | 19202941  | TGCTCATGATGTTGAGGAGG     | AACCGGAGATTCAGACATGC        | 1                |                      |
| Ad03A7453  | Aradu.A03  | 22155632  | 22155744  | ACTCTGTTGGTGGGTTCCAA     | GCCGAAACCTCTCTCTCACT        | 1                |                      |
| Ad03A8741  | Aradu.A03  | 27526946  | 27527055  | AGAATGGAAAGGGGAAATGG     | ACCACCCAAACCCTCTTCTT        | 1                |                      |
| Ad03A9257  | Aradu.A03  | 29737406  | 29737485  | GCATGCATACATACGATACCAA   | CAAGAAGTGGACGAGGAAGC        | 2                | Yes                  |
| Ad03A9719  | Aradu.A03  | 31631661  | 31631750  | GATAACGCCAATTGGATAGTCA   | TGTAGCCAACCCACCTAGT         | 1                |                      |
| Ad03A10896 | Aradu.A03  | 37446991  | 37447101  | CTAAAAAGGTCGAACGCTGC     | GAACAGCCCAAATCTCCTGA        | 1                |                      |
| Ad03A10902 | Aradu.A03  | 37503013  | 37503095  | CAACTCCCAACTTGATCTTTGA   | TTGGGTCTGGCCATATTTTT        | 1                |                      |
| Ad03A11035 | Aradu.A03  | 38270609  | 38270701  | CGTCGCTAGATCCCAATAG      | GGAATGCTTGTGTATATCATCCC     | 1                |                      |
| Ad03A11523 | Aradu.A03  | 40019588  | 40019680  | TCAAGTTTCTGCGAGATAAAAGC  | TTTTTAGTTAGGGGTAATTTGGTAAT  | 1                |                      |
| Ad03A12321 | Aradu.A03  | 45133345  | 45133424  | AGAGGAGATGGTGGTGTGG      | TCTTCTTCTCTCGCGCTGTT        | 1                |                      |
| Ad03A13940 | Aradu.A03  | 59832600  | 59832687  | CCAGTGGAGGACAATGAGGT     | CCACACACTCGCCATAACAT        | 2                |                      |
| Ad03A20541 | Aradu.A03  | 112587165 | 112587268 | TCAGATAAATACCAGCACCCTAGA | TTGTCAAAGAAAATAATCATATCACTC | 1                |                      |
| Ad03A20827 | Aradu.A03  | 113819076 | 113819242 | CTCCTAACTCAGCCTGCGAA     | CGTCTGGACTCTTAAAGCGG        | 1                |                      |
| Ad03A21320 | Aradu.A03  | 116104456 | 116104575 | GCATTACACAATGCATGAAAGAA  | CCTCTTTTTAGATGTTATGTTTTCCC  | 1                |                      |
| Ad03A23094 | Aradu.A03  | 122308487 | 122308582 | TTCGTTAGGTGAAAACCACC     | TCGTACGTATATCCAATGCTCG      | 1                |                      |
| Ad03A25225 | Aradu.A03  | 128087042 | 128087132 | AAACAACGAATGAAAAGGCG     | ATGCGTTATTCAACCGCTTC        | 2                |                      |
| Ad03A26250 | Aradu.A03  | 130902805 | 130902907 | CCTCTTGCAAGGAACCAGAC     | GCAGATTCCACGTTCCACAT        | 1                |                      |
| Ad03A27345 | Aradu.A03  | 133757973 | 133758108 | CCGGCTTGCGAAGATAACTA     | CTGGAGACTTCTGAATTTGCG       | 1                |                      |
| Ad03A27468 | Aradu.A03  | 134042521 | 134042644 | TGGTATCGTCGGCTACACAC     | CAGAACGAAACCGAGTGAGA        | 1                |                      |
| Ad03A27581 | Aradu.A03  | 134359041 | 134359127 | GAGCCACAAGTGCTTCTTCC     | TTGAAAGAAGAGGGAACCGA        | 1                |                      |
| Ad04A21    | Aradu.A04  | 103018    | 103113    | GGATGCACGTCATTCAGAAG     | GCTCATCAAGCTGCTGAGAAA       | 2                | Yes                  |
| Ad04A461   | Aradu.A04  | 1341236   | 1341377   | TTAGTGACAAGTTTGGCTTAAAAA | TGTGTGCTGATTCCAAAACCTG      | 0                |                      |
| Ad04A1557  | Aradu.A04  | 4195842   | 4195974   | ATAATGCAGGTAACGTGTAGACC  | CCGGTAACATGGAGTTTAACAA      | 1                |                      |
| Ad04A1757  | Aradu.A04  | 4751607   | 4751729   | ATGGATCTCCCCACCAGAG      | CCTCCTATTCCACCACCGTA        | 1                |                      |
| Ad04A2095  | Aradu.A04  | 5761694   | 5761808   | TCGAAATAGAAACAAAATAGCACG | TATTTATTTGCACGTCCCCC        | 1                |                      |
| Ad04A2230  | Aradu.A04  | 6187406   | 6187579   | GGACTTTCAAATGATCCACC     | GTGCGCAAAGAAGAAAGAGG        | 1                |                      |
| Ad04A2284  | Aradu.A04  | 6339271   | 6339380   | CCAACATACTTGGATTGTGGA    | GAAGCCTCTACCCAAAATGG        | 1                |                      |
| Ad04A2525  | Aradu.A04  | 6975221   | 6975365   | CCGTTAGACATAATAGCCCTCC   | GCAGTCCTTCGTTATGAAATACAA    | 0                |                      |
| Ad04A2797  | Aradu.A04  | 7860995   | 7861152   | CACCCCAATTACCCTAAGCC     | TCCTTCATTGGGCTCCTAGA        | 1                |                      |
| Ad04A2812  | Aradu.A04  | 7914953   | 7915051   | GGATGCATGTCCCTAAATCAG    | TTTGGGGTAGAACTTAGGAACG      | 1                |                      |

| ID         | Chromosome | SSR_start | SSR_end  | FORWARD PRIMER (5'-3')      | REVERSE PRIMER (5'-3')      | Bands in parents | Polymorphism in RILs |
|------------|------------|-----------|----------|-----------------------------|-----------------------------|------------------|----------------------|
| Ad04A3067  | Aradu.A04  | 8906195   | 8906274  | CCCATCCCCTTACATGATTG        | GGGCCATCACAACCTCTGTTT       | 1                |                      |
| Ad04A3269  | Aradu.A04  | 9466735   | 9466861  | TGAGACTGCACCGTTACCAA        | CTTTGTATTGGGCCAGGGTA        | 1                |                      |
| Ad04A4138  | Aradu.A04  | 13332801  | 13333000 | AGGTTGATGGATTCCGGATGA       | AGTGCGCAGGATAAGAATCG        | 1                |                      |
| Ad04A4346  | Aradu.A04  | 14450726  | 14450855 | TCTCGCAAATTGGTCATTCC        | CTGTTTAAAGAGAAATTTTGGTGT    | 2                |                      |
| Ad04A4579  | Aradu.A04  | 15438141  | 15438225 | TTTTAATTTCTCAAACCTGAATTACCA | GCAGAACAAGTCATTTGCCA        | 0                |                      |
| Ad04A5084  | Aradu.A04  | 17620340  | 17620502 | TCTCTCTCCTTTCTCTTCCC        | TTCTCCTCTTTCTTCCCTTCTTC     | 1                |                      |
| Ad04A5923  | Aradu.A04  | 22658627  | 22658741 | GACCCAAATGTGGATGAAATG       | GAACCTGCATTTCCCTTTTTCC      | 1                |                      |
| Ad04A6351  | Aradu.A04  | 25728970  | 25729123 | GCTCTCAAAGCCAACCTTCA        | TGCACATATCTTCTCCACCG        | 1                |                      |
| Ad04A6854  | Aradu.A04  | 28408642  | 28408749 | TGCCACTTCACCATCTTTGA        | GGGTGAATCCATGCTTCAAT        | 1                |                      |
| Ad04A6871  | Aradu.A04  | 28541956  | 28542057 | AAATCTCAAAGGCCACCAAA        | AGAAAAACGCGAACAGAGGA        | 1                |                      |
| Ad04A6890  | Aradu.A04  | 28581819  | 28581905 | ATTTGGCCAATTTTAAGGGC        | AGCTGTGACAGAAGCAGCAA        | 2                |                      |
| Ad04A7863  | Aradu.A04  | 35312406  | 35312495 | CCATTTTCTTGAAAAACATAAAATCC  | TCCTTGTTTTGAAAAGGTACA       | 1                |                      |
| Ad04A8090  | Aradu.A04  | 37588919  | 37588999 | TGCCATTGATGGTAGTGAA         | CACAACACAACCCCTCTTC         | 1                |                      |
| Ad04A8117  | Aradu.A04  | 37890425  | 37890613 | TAGTGCTCACCTCGAGCAA         | TCTTCACCTTGGCTGAAACC        | 1                |                      |
| Ad04A8903  | Aradu.A04  | 43109821  | 43109900 | GGGAAATTGTGGGAACAAAA        | TTCTGAATTCAACATTGGGG        | 1                |                      |
| Ad04A9456  | Aradu.A04  | 48403744  | 48403859 | AACCTTTGCTTTACGGCTAGA       | TGATGCCAAAAAGCGTATGA        | 1                |                      |
| Ad04A9900  | Aradu.A04  | 53171122  | 53171203 | ATCTCTGTACGTGCATCCCC        | AATTCTCCAGATTCCCCCAT        | 1                |                      |
| Ad04A10156 | Aradu.A04  | 55706396  | 55706476 | GCCAAGTTATGGTGTCTTCTCC      | AGTTGATCCATTGATTCCGGG       | 2                | Yes                  |
| Ad04A10818 | Aradu.A04  | 62667038  | 62667138 | CCAACCTCAAACCCACCCTAA       | ATTACTCGCCCTCAAGCAAG        | 1                |                      |
| Ad04A10872 | Aradu.A04  | 63227250  | 63227380 | TTCAAGCGAGCATTGTTTTT        | TTACATTTTTGGATTGAATTTTAGC   | 0                |                      |
| Ad04A10897 | Aradu.A04  | 63559185  | 63559305 | AATATTGGTGGTGGCCGATA        | TTAAATTTGAACCGCGAACC        | 0                |                      |
| Ad04A11052 | Aradu.A04  | 65071089  | 65071265 | AAAACGTTAACGGGTTGGAT        | AGCGGCCTTCTCTCTCTTTT        | 1                |                      |
| Ad04A11387 | Aradu.A04  | 68445087  | 68445168 | CTGCGCCACACAACCTACACT       | CGAAGGGTCAACACCAAACCT       | 1                |                      |
| Ad04A11619 | Aradu.A04  | 70474936  | 70475100 | CCCTTTAGTGCCTTAACACGA       | GGGGTGACAAATGTATTCCAA       | 1                |                      |
| Ad04A12132 | Aradu.A04  | 74597475  | 74597589 | CCATCTCCATCACCCATTCT        | AATCTAGAACCAAAGCCGCC        | 2                |                      |
| Ad04A12402 | Aradu.A04  | 76350205  | 76350330 | CCTGCAACCTCACTTCCTTC        | GCGCATCAAAGCAACATTTA        | 2                | Yes                  |
| Ad04A12498 | Aradu.A04  | 76926950  | 76927048 | GGTTTGCACGTGATGCTAGA        | TGCAAATATCTTGTAATCCCCA      | 1                |                      |
| Ad04A12528 | Aradu.A04  | 77258641  | 77258750 | ATTTTCTTCCCCCTTGCACT        | CGATGATAACGATAACGACGA       | 1                |                      |
| Ad04A13343 | Aradu.A04  | 84079616  | 84079707 | GAGGTGGCGAGGTATTACGA        | CCCACCTTGAAATTGTGACC        | 1                |                      |
| Ad04A13748 | Aradu.A04  | 87160039  | 87160118 | GACAGAGGTTGGCAAGAAGC        | CGTCGTCCTTGTCAGCAATA        | 2                |                      |
| Ad04A14516 | Aradu.A04  | 92251874  | 92252083 | CCAATCCAAAAGCATAAAACTAGG    | TTAGATGTAGTTTTTAGAGAGAGAGGC | 1                |                      |
| Ad04A14650 | Aradu.A04  | 93079659  | 93079780 | TGTTGGGAACAAAATTTAAAACG     | GCAATATGTGATGTTGTTGGG       | 0                |                      |
| Ad04A14906 | Aradu.A04  | 94416671  | 94416761 | CAAATTATTGGCTTGAGCATGA      | CTGTCCATCCTTACCATCGG        | 2                |                      |

| ID         | Chromosome | SSR_start | SSR_end   | FORWARD PRIMER (5'-3')     | REVERSE PRIMER (5'-3')     | Bands in parents | Polymorphism in RILs |
|------------|------------|-----------|-----------|----------------------------|----------------------------|------------------|----------------------|
| Ad04A15591 | Aradu.A04  | 98395455  | 98395608  | TCATCACTCCCCTCCCCT         | GGGAGAGAGAGGGAAAGAAA       | 1                |                      |
| Ad04A15698 | Aradu.A04  | 98814538  | 98814659  | CAGCCCCTTGATTTGATTCT       | AACAACAAGCTCAACCAGCA       | 1                |                      |
| Ad04A15908 | Aradu.A04  | 100024809 | 100024914 | GAGGGATAGGCACTGTATTGGA     | CGCAATACCGATCCCAAAAT       | 1                |                      |
| Ad04A16428 | Aradu.A04  | 102588310 | 102588432 | GTCCCCTGCACCCTTTCTAT       | AGCGAAGTGACAACACCAAA       | 1                |                      |
| Ad04A16643 | Aradu.A04  | 103870932 | 103871017 | GCAATGATAGAAAAACCAACCA     | TTGAAACCTTCAAGTCACGTACA    | 1                |                      |
| Ad04A16899 | Aradu.A04  | 104884143 | 104884257 | AAGGGGTGAGCGTAGAGTGA       | TGAACTGAGAAGCAAATGGG       | 1                |                      |
| Ad04A17826 | Aradu.A04  | 108332214 | 108332331 | TTGTTAAGAGGGTGCAACAAGA     | TTTCGGTGCTATTTTCCTGA       | 0                |                      |
| Ad04A17984 | Aradu.A04  | 108787895 | 108787974 | AAACTTCATTAACACGCGCA       | CGTGCAGAAACGAAAGAAAA       | 1                |                      |
| Ad04A18482 | Aradu.A04  | 110619947 | 110620042 | CATGTCGGAGGAGGTGTTTT       | TTGAAAGAATAATCCAAGAAGCAA   | 1                |                      |
| Ad04A19707 | Aradu.A04  | 114711757 | 114711902 | TGATTTGTTTGTGAAATTTTGG     | GTGTTTTCTCCCACCACCAC       | 2                |                      |
| Ad04A21094 | Aradu.A04  | 118753391 | 118753514 | CTTCACTGTGAGGTGGAGGC       | CCCTCTTAACGCACTGTTATCAA    | 2                | Yes                  |
| Ad04A21449 | Aradu.A04  | 119715357 | 119715476 | AGATGGGCACGTGTTAAAGG       | TGAGAACAAAATCCCATGCC       | 1                |                      |
| Ad04A21670 | Aradu.A04  | 120164301 | 120164442 | TGCAAAGTGGGAGACAGAAA       | CAAAATGACAGCCACCTCCT       | 0                |                      |
| Ad04A21812 | Aradu.A04  | 120575256 | 120575382 | TGGTGATGATGATGGTGTGA       | CACCATACCCTCCTTTCCCT       | 1                |                      |
| Ad04A22108 | Aradu.A04  | 121328083 | 121328215 | TCTGCAATAAATTAGTCATTAGCCTG | GATTTTCTTTCCAAAAACAATAAAA  | 0                |                      |
| Ad04A22784 | Aradu.A04  | 123059422 | 123059555 | CGAGATTAAACTTTGATTTGGATT   | TTGCTGGTCCATTCTTCTGA       | 0                |                      |
| Ad04A22916 | Aradu.A04  | 123424617 | 123424716 | AATGACATCTTCCGCTCTGG       | CGTACCCCTTTTGGAGTCAA       | 1                |                      |
| Ad05A880   | Aradu.A05  | 1948296   | 1948386   | AAATCTTGTAAGTCTAAATTGCCTGC | ATGCTGTCTGCTTTTGGAT        | 0                |                      |
| Ad05A1015  | Aradu.A05  | 2317513   | 2317642   | ACTTCACCTGTTGCCATTCC       | GACAAAAGGATGAGAAGCCAA      | 1                |                      |
| Ad05A1766  | Aradu.A05  | 4215732   | 4215847   | TTCTTCCTTCTTTCTAAGTCAAATCC | TTTTGACCTCCCAAGACAC        | 1                |                      |
| Ad05A3091  | Aradu.A05  | 7983899   | 7983979   | CAACGACCAACGTGTCTATCA      | TGCGTTACTAAAAGAAAGTCAGC    | 2                |                      |
| Ad05A5040  | Aradu.A05  | 14837039  | 14837244  | GCCTCTCGCCAGATCCTAT        | CTCTCATTGTACAGTCGTTCA      | 1                |                      |
| Ad05A5506  | Aradu.A05  | 16983491  | 16983592  | CAAAGCCTTGGATCCTTTTG       | TGAAGCAAGAAAAAGCAGTGAA     | 1                |                      |
| Ad05A5618  | Aradu.A05  | 17480986  | 17481078  | GGGCTAAGATTCAACCTCCC       | TCCAGAATGCACTGAAC TCAA     | 2                | Yes                  |
| Ad05A6083  | Aradu.A05  | 19512930  | 19513010  | CACTCAAATATCTTCGTGTTACACCT | AAAGAAGAAGAAGAAACACATAATGG | 1                |                      |
| Ad05A6457  | Aradu.A05  | 21269703  | 21269789  | CCGATGACAGCTGAAGCAT        | CAACCAACCTGAAATCAAATG      | 2                |                      |
| Ad05A6813  | Aradu.A05  | 22757512  | 22757654  | AAAATGGTCCCAAGGTTTC        | CATGTTGCTTGATTTTGTATTTTC   | 1                |                      |
| Ad05A7087  | Aradu.A05  | 23898961  | 23899046  | CCAGCAAAGCATTTAGACCA       | TGTCGAGGAATAATCAGAAAAGAA   | 1                |                      |
| Ad05A7404  | Aradu.A05  | 25668161  | 25668242  | TGCATTATTATTATTGGCTCCAC    | GGAGTTGATGGGGATT CAGA      | 1                |                      |
| Ad05A7725  | Aradu.A05  | 27287440  | 27287550  | TTTTGGAAAATGGGAGCACT       | ATGCAACCTAACCTCCCATC       | 1                |                      |
| Ad05A7920  | Aradu.A05  | 28222833  | 28222968  | GCCTTGCTTCTGCTTTCTTG       | GCATAATTACCTCCTCCACCA      | 1                |                      |
| Ad05A8309  | Aradu.A05  | 31500819  | 31500972  | TGCAAGAAGACGAAGAACGA       | AAAAACGCGATGCAAAGTCT       | 2                | Yes                  |
| Ad05A10356 | Aradu.A05  | 46835750  | 46835935  | TTTTTGGTCGAAAACCACG        | GATGAGTGCCGGGAAGTAAA       | 2                | Yes                  |

| ID         | Chromosome | SSR_start | SSR_end  | FORWARD PRIMER (5'-3') | REVERSE PRIMER (5'-3')    | Bands in parents | Polymorphism in RILs |
|------------|------------|-----------|----------|------------------------|---------------------------|------------------|----------------------|
| Ad05A10410 | Aradu.A05  | 47283518  | 47283603 | TCACAATTTTCGTCCACCAAG  | AAAGCATGTAATTGACACCAA     | 1                |                      |
| Ad05A10428 | Aradu.A05  | 47385002  | 47385132 | GTAGGAAAAAGGATGCGACG   | AGATTGGTGGTGACAGAGGC      | 1                |                      |
| Ad05A11487 | Aradu.A05  | 56111959  | 56112066 | GAAACAACGGAGGATTTTGC   | TCTTCGTCTTCATCCCCAAG      | 1                |                      |
| Ad05A11997 | Aradu.A05  | 60705572  | 60705697 | AAGAGCAGGAGGAGGAGGAG   | TCACGCGCTTTCTTCTTCTT      | 1                |                      |
| Ad05A13419 | Aradu.A05  | 74295694  | 74295773 | TGCAATTGTGACATCGCTTT   | AAGGAAGCATGGATTGTTGG      | 2                |                      |
| Ad05A14690 | Aradu.A05  | 81322053  | 81322133 | AACACCAAGTCGGACGTTTT   | GGGTTATTAATTCGATGGACG     | 2                | Yes                  |
| Ad05A16397 | Aradu.A05  | 87518253  | 87518354 | CAGAAGCACCAGCAAAAACA   | GTCTCTGATCCCTCCACTGC      | 2                |                      |
| Ad05A16591 | Aradu.A05  | 88171732  | 88171840 | TGGTAGCCAAGATCACTTTTCG | TCAAAGGGTGAGTTCGAGG       | 1                |                      |
| Ad05A16836 | Aradu.A05  | 89011034  | 89011157 | GAAGAAGTGCACCCCATGAT   | TGCTTGCTAAAACACAAGCATT    | 1                |                      |
| Ad05A17280 | Aradu.A05  | 90419102  | 90419206 | TCCATCGAGGAATCACTCAAG  | GCGCTTGATTTTTAGCATGA      | 2                | Yes                  |
| Ad05A17484 | Aradu.A05  | 90948599  | 90948685 | ATGTTGAGAGAGAGGGAGCG   | TCCCCTCTCTTTGTCTTCCT      | 2                |                      |
| Ad05A17799 | Aradu.A05  | 91857791  | 91857916 | GCAGTGAGGCTCTGCTCTTT   | CTATGCCTCAAGCACAAAGGT     | 1                |                      |
| Ad05A18148 | Aradu.A05  | 93040040  | 93040055 | TGAGGGCTACAGCATCACTTT  | CCAAAGGCTACGCTTTTCAG      | 2                |                      |
| Ad05A18149 | Aradu.A05  | 93043329  | 93043344 | CTTGTAGCCGTGGTGACAGA   | TGCAACTATTGCCACCTTCA      | 1                |                      |
| Ad05A18152 | Aradu.A05  | 93055037  | 93055051 | TGCTTGAAAGTTATGGCGAA   | TGTTACGCCCATGACAAAAA      | 1                |                      |
| Ad05A18154 | Aradu.A05  | 93071811  | 93071825 | CGTTTGATTCATGTAGCCGA   | GGAAGATGAAATGAACCGGA      | 1                |                      |
| Ad05A18156 | Aradu.A05  | 93077386  | 93077400 | AAAGAAACCTCAGGGGAGGA   | TGTTAGGTGGAGTTTTGGGG      | 1                |                      |
| Ad05A18158 | Aradu.A05  | 93080504  | 93080519 | CACGTTAAATTTAGGGGCAGA  | CAGTTTATCCAACGTTTAGTGGG   | 2                |                      |
| Ad05A18162 | Aradu.A05  | 93082508  | 93082519 | TGTGCGTTAATTTATGCTCATT | TGCCTTGAGAATAAACACATGA    | 1                |                      |
| Ad05A18164 | Aradu.A05  | 93085460  | 93085471 | TTACCGTCGAATTTATCCGC   | GCTAACGTTGGGTTGCAAAT      | 1                |                      |
| Ad05A18165 | Aradu.A05  | 93098551  | 93098584 | TGGATATCGATTTACAAACCCC | CAATTCATACCCGGGCTTA       | 1                |                      |
| Ad05A18166 | Aradu.A05  | 93100670  | 93100681 | CCAAATGCTAACCTTGGCTC   | TTGGGCTTTTAGTCCCTTTG      | 1                |                      |
| Ad05A18171 | Aradu.A05  | 93115735  | 93115752 | ATGGGCCTAATATGCGAATG   | TGATCATGTTTGGGACGAGA      | 1                |                      |
| Ad05A18173 | Aradu.A05  | 93122484  | 93122591 | CGCGCATTAAATTCATTTTGA  | GAGGAAGAAGAACGTGCAGC      | 1                |                      |
| Ad05A18174 | Aradu.A05  | 93122707  | 93122770 | GCTGCACGTTCTTCTTCCTC   | TTTCTCCTCCTCATCTTCTGC     | 1                |                      |
| Ad05A18175 | Aradu.A05  | 93123353  | 93123407 | GAAGGAGAAAGAGAAGGCAAGA | ATCGTTTGGGTGAATTCCTG      | 1                |                      |
| Ad05A18176 | Aradu.A05  | 93123821  | 93123875 | TTTCTCCTCCTCATCTTCTGC  | CCACATACTGTTACGGCACG      | 1                |                      |
| Ad05A18178 | Aradu.A05  | 93128990  | 93129010 | TTTGATATACGTGAATCGGGT  | CGTTTTCCCTCCAAAATGAA      | 1                |                      |
| Ad05A18180 | Aradu.A05  | 93152882  | 93152899 | TAATCCACCGATCAATTGCC   | CCCATTCCAAATTAACAGCA      | 2                |                      |
| Ad05A18185 | Aradu.A05  | 93175289  | 93175302 | TTTTGACCTCATTTTGAGTTGC | AGCGAATTTGCAGAAGATGG      | 1                |                      |
| Ad05A18194 | Aradu.A05  | 93205487  | 93205512 | CAAATGTGGTAGGGTGAGGG   | AGGTGCATGAATGAAGGAGG      | 2                |                      |
| Ad05A18199 | Aradu.A05  | 93212809  | 93212840 | TTTGATTTTGCCATACAACCTT | TCTCTCCTTTAATTCCTTCTCAAAA | 0                |                      |
| Ad05A18202 | Aradu.A05  | 93222365  | 93222378 | TGGCTCACGACTCAACTCAT   | AAGGCTTGACGAACTTCAA       | 0                |                      |



| ID         | Chromosome | SSR_start | SSR_end  | FORWARD PRIMER (5'-3')   | REVERSE PRIMER (5'-3')     | Bands in parents | Polymorphism in RILs |
|------------|------------|-----------|----------|--------------------------|----------------------------|------------------|----------------------|
| Ad05A18207 | Aradu.A05  | 93231544  | 93231582 | GTGAACTTGCCTATCCGCA      | GCTTTGAAATTATTAATGTGTCAAGT | 1                |                      |
| Ad05A18208 | Aradu.A05  | 93232891  | 93232904 | CGTGCTGATAACGTGTTGTG     | TGAAAAAGAGAATTTTGGGCA      | 1                |                      |
| Ad05A18209 | Aradu.A05  | 93238523  | 93238542 | AACGAGTTCGTTTTTCAAGGA    | TCTCTCCTTGCTTGTTTACG       | 0                |                      |
| Ad05A18210 | Aradu.A05  | 93245280  | 93245291 | AGCCATTTTCGGATAGAGCA     | AAGCAACGCTCTTCTTCCTTC      | 1                |                      |
| Ad05A18211 | Aradu.A05  | 93254222  | 93254233 | ATGCATGCAAGATGAGATGG     | CTAATACCCGATCCAAGCCC       | 1                |                      |
| Ad05A18212 | Aradu.A05  | 93256232  | 93256252 | TTTCTTTTTGTCCATACGTTTCAA | TGTGTTGCTTTGCTTGTGAA       | 2                |                      |
| Ad05A18213 | Aradu.A05  | 93262456  | 93262467 | CAAACGGCTTGTCATCAGA      | ATCACCCACCCTTTTGTTT        | 1                |                      |
| Ad05A18214 | Aradu.A05  | 93266068  | 93266081 | TCAGAGTATGCCAGAAGCA      | TCCCCATTTATTTTTGCGAC       | 1                |                      |
| Ad05A18215 | Aradu.A05  | 93269841  | 93269858 | TGGCAGAGCAATAACAATAAACA  | TTTTCTGCTAAAGCATCTCATTTG   | 1                |                      |
| Ad05A18216 | Aradu.A05  | 93270738  | 93270757 | CCATATCCATTGCGACCTCT     | TTCCATCCGCAAATTAGGTC       | 1                |                      |
| Ad05A18217 | Aradu.A05  | 93271409  | 93271420 | ATCAGCCGCTAAAGTCCTCA     | CTCCCTCTCTCAACGACG         | 1                |                      |
| Ad05A18218 | Aradu.A05  | 93271534  | 93271547 | ATCAGCCGCTAAAGTCCTCA     | CTCCCTCTCTCTCAACGACG       | 1                |                      |
| Ad05A18220 | Aradu.A05  | 93286586  | 93286601 | CCTGTGCAGACCCGTTAAAT     | TCAATCTTCCTTTCATCCCCG      | 1                |                      |
| Ad05A18221 | Aradu.A05  | 93289241  | 93289252 | GCTTCAGCTCACCATTTTCC     | CACAGAGAATGCACAGAAGCA      | 2                |                      |
| Ad05A18225 | Aradu.A05  | 93298325  | 93298339 | CAACAATATCTTTAAAAGCCAACG | TCGGATTGGATTTTGGATCT       | 1                |                      |
| Ad05A18226 | Aradu.A05  | 93300181  | 93300204 | TTGGCAATTTTAGAGCAAGGA    | TGCGATAAAAACTGTAAAAGCA     | 1                |                      |
| Ad05A18228 | Aradu.A05  | 93306164  | 93306184 | GCCTAAAGACACAATTTGGCA    | GCCACCCTTATTACCTGCAA       | 1                |                      |
| Ad05A18229 | Aradu.A05  | 93307326  | 93307346 | CATGTTGAAAAGGTTGGGGT     | GTGGGGTGAGGGGTTACTTT       | 1                |                      |
| Ad05A18233 | Aradu.A05  | 93318764  | 93318797 | TTGGACCTCGTTGTTCTTCA     | GCTCGGTGATCCAAAATAGC       | 1                |                      |
| Ad05A18235 | Aradu.A05  | 93327408  | 93327526 | GTGCCAAAATCATTGTTCC      | ATGTACCCATGCACAACCAA       | 1                |                      |
| Ad05A18236 | Aradu.A05  | 93329194  | 93329223 | TTTGTTCGTGCGTTTGTTC      | CAGGGCGGAAGACAATCTAA       | 2                | Yes                  |
| Ad05A18245 | Aradu.A05  | 93350071  | 93350088 | GGTTTCTCCTCCACCAATGA     | TTGCAGGGATCAGCAGTATG       | 1                |                      |
| Ad05A18247 | Aradu.A05  | 93351716  | 93351757 | CACGTGCAATTGATCAGGAC     | TTCCCTCAGCTAGGGTTCTTT      | 1                |                      |
| Ad05A18249 | Aradu.A05  | 93353834  | 93353847 | AAAGGGGGTACCCGACTGA      | ATGAAAAGCAAGAGAGGGGCA      | 1                |                      |
| Ad05A18250 | Aradu.A05  | 93358571  | 93358584 | TTGCAAGTGCAAGCTGTCAT     | TATGAGCCCATCACTTTCCC       | 2                |                      |
| Ad05A18253 | Aradu.A05  | 93367861  | 93367875 | AACGTGAAAGGTTTTGGTGG     | CGAGGGGGTTGAGTCTATGT       | 1                |                      |
| Ad05A18255 | Aradu.A05  | 93369624  | 93369639 | CATGCATGGTGATCTTTTCAA    | TGCACATTGGGAAATGTTGT       | 1                |                      |
| Ad05A18257 | Aradu.A05  | 93371311  | 93371325 | TCATCCTCCCAACCTGAATC     | ATCACTTGATGGTGGCCAAT       | 1                |                      |
| Ad05A18258 | Aradu.A05  | 93371771  | 93371785 | AAGGCATTGCAGCTTAGGAA     | CCAAAGGGAGTCCAAATTGA       | 1                |                      |
| Ad05A18260 | Aradu.A05  | 93378315  | 93378330 | CAACATCTATTTTACTTCCACCA  | TGAAAAGAGAAGAAGAGGGTGA     | 1                |                      |
| Ad05A18269 | Aradu.A05  | 93424694  | 93424705 | CAGATGAAGGCCCTTGGTAA     | TCATGTTTTGGTGGGTTTCA       | 1                |                      |
| Ad05A18270 | Aradu.A05  | 93425757  | 93425771 | GCCTAACCCATTCCCTTCTC     | AGGGTCACCGAATCTCACAC       | 1                |                      |
| Ad05A18271 | Aradu.A05  | 93426310  | 93426344 | GAGCGTTGAGGAGGAAGATG     | CCTTATCGCCTTTTGTGCT        | 1                |                      |

| ID         | Chromosome | SSR_start | SSR_end  | FORWARD PRIMER (5'-3')      | REVERSE PRIMER (5'-3')     | Bands in parents | Polymorphism in RILs |
|------------|------------|-----------|----------|-----------------------------|----------------------------|------------------|----------------------|
| Ad05A18274 | Aradu.A05  | 93437488  | 93437503 | CCAATTGGGAAATGGAATTG        | GCTCTTCCCACTTTTTGTGG       | 0                |                      |
| Ad05A18275 | Aradu.A05  | 93438851  | 93438874 | CATCCAAATTTCTCACCTGCT       | TTGTGGGTCAACTCGGGTAT       | 2                | Yes                  |
| Ad05A18277 | Aradu.A05  | 93445698  | 93445712 | GCCGGTGAACCTTACTTGG         | CGATTGAAACCGGAGAAAAA       | 1                |                      |
| Ad05A18287 | Aradu.A05  | 93482168  | 93482182 | CCACATTGCCATTCTCTTT         | ATGGAACCCACTTGGCATT        | 1                |                      |
| Ad05A18288 | Aradu.A05  | 93484405  | 93484430 | GGGAGACAGACAGGGATTTTT       | TCTGCAAAAATGCAAAGGC        | 1                |                      |
| Ad05A18289 | Aradu.A05  | 93484691  | 93484702 | CCACACCATTCCAATGAACA        | GCTACAAGCACAAGTGGACAA      | 1                |                      |
| Ad05A18290 | Aradu.A05  | 93485843  | 93485872 | GAACAATGTTTTGCAGGCAC        | GCAAGAAGAGGTCAAGCCAC       | 1                |                      |
| Ad05A18291 | Aradu.A05  | 93486026  | 93486040 | TCACTCTTACCTTTTCCACCA       | TCAACTCCTGCAGCTTCTCA       | 1                |                      |
| Ad05A18292 | Aradu.A05  | 93486439  | 93486515 | TGATGATGCATTGTTGTTGTTG      | TCCAAGCATGGATCTCATCA       | 1                |                      |
| Ad05A18294 | Aradu.A05  | 93489992  | 93490007 | AGGACGGAAAAGGACACAGA        | TTTCTCCTCATCACCGAACC       | 1                |                      |
| Ad05A18304 | Aradu.A05  | 93506846  | 93506860 | TCATGTCTCCGTTTTCCCTC        | ACGTGAATGGGTAACAAAGATT     | 1                |                      |
| Ad05A18305 | Aradu.A05  | 93508481  | 93508492 | TTTCCATTA AAAATTCATATCGTTTG | TTTCCACAACCACCTTGACC       | 2                |                      |
| Ad05A18317 | Aradu.A05  | 93527578  | 93527591 | CAGTAAGTAGATTGCATCCGAAA     | AGCGTGGAAGAAAATTGAGC       | 2                |                      |
| Ad05A18320 | Aradu.A05  | 93532341  | 93532360 | ACCGTATAAACAAAACGAGATATACA  | TGCATATCAATTA AAAACATTTTCG | 1                |                      |
| Ad05A18322 | Aradu.A05  | 93536529  | 93536595 | AAATCATTTGAGAAAGTGAAAGGA    | CCACCATAATTTAAGCCACCA      | 1                |                      |
| Ad05A18329 | Aradu.A05  | 93568056  | 93568106 | TTCCAAATACACAATGATCGAAA     | TCTCTGCTTGACTTGCTCTTT      | 1                |                      |
| Ad05A18332 | Aradu.A05  | 93572702  | 93572743 | TGAGACATTGGTCCAAAAACA       | TTATCATAATAGTTACACGGGAAAAA | 0                |                      |
| Ad05A18334 | Aradu.A05  | 93577419  | 93577541 | GTTGCTACACATACGGGCT         | TTTCTCCTCATCTTCTGCTGC      | 1                |                      |
| Ad05A18335 | Aradu.A05  | 93577983  | 93578097 | TTCTTCAAAAACGATTTACCA       | GCGTTTCGAACCATTTCTCT       | 1                |                      |
| Ad05A18337 | Aradu.A05  | 93583591  | 93583605 | CTCGAGATTGAACTCCGAGC        | CACCACCCATCATTTGTAC        | 2                | Yes                  |
| Ad05A18344 | Aradu.A05  | 93597000  | 93597052 | TTCTTGGGCCACTTAACACA        | TCAAAGATCAAAGAGCCACTCA     | 1                |                      |
| Ad05A18356 | Aradu.A05  | 93633418  | 93633437 | GCACATGAACCGTGAGTGAC        | CATGAACTGCATGTGTACAAAGA    | 1                |                      |
| Ad05A18360 | Aradu.A05  | 93640397  | 93640542 | TGGCTCTTGAAAGAATGATGG       | AGCACATGGTTAGGGACAGC       | 1                |                      |
| Ad05A18372 | Aradu.A05  | 93664301  | 93664324 | TGCAATATCTGCTTGGTTGC        | TCCAGAATTACCTTCAACTCA      | 1                |                      |
| Ad05A18373 | Aradu.A05  | 93671943  | 93671962 | GGGTTTTGGAACAAGCGTAT        | GAACAATTTTGCTGCCATGA       | 1                |                      |
| Ad05A18375 | Aradu.A05  | 93679350  | 93679369 | GGCCATGTAACCTTTTTGCT        | GAGCGTCCAAGATGATGTGTT      | 1                |                      |
| Ad05A18376 | Aradu.A05  | 93684792  | 93684811 | CAGATGCCATGACAAAACCA        | TGAACCATCCATCAATTAGAGGT    | 1                |                      |
| Ad05A18377 | Aradu.A05  | 93686168  | 93686192 | TGGTGCCTTTGTTATGGTGT        | AAACAAAAGCCCAATGCAAC       | 1                |                      |
| Ad05A18383 | Aradu.A05  | 93704280  | 93704300 | TTGAAATAAGGAGATGTGCCG       | TCACAATGCAACACGCCTAT       | 1                |                      |
| Ad05A18384 | Aradu.A05  | 93704534  | 93704548 | TTGCCAAATGACAATGATGAA       | AGCCAAAGCCAAAGACAAGA       | 1                |                      |
| Ad05A18385 | Aradu.A05  | 93704715  | 93704729 | TCTTGCTTTGGCTTTGGCT         | TTGGTGCCTTCAAGAACTCC       | 1                |                      |
| Ad05A18386 | Aradu.A05  | 93705657  | 93705695 | TTGGCAGAAATGTTGTTGGT        | ACGCCAAAGGAGTGCTAAAA       | 1                |                      |
| Ad05A18387 | Aradu.A05  | 93706229  | 93706244 | CAGTTTCAGCCACATATTCACA      | TTGTTGGCATTCAATTTGAAG      | 1                |                      |

| ID         | Chromosome | SSR_start | SSR_end  | FORWARD PRIMER (5'-3')      | REVERSE PRIMER (5'-3')      | Bands in parents | Polymorphism in RILs |
|------------|------------|-----------|----------|-----------------------------|-----------------------------|------------------|----------------------|
| Ad05A18388 | Aradu.A05  | 93707223  | 93707346 | CATTGAACACAAACCCAGCTT       | TGGAGATGGGGAATAATGGA        | 1                |                      |
| Ad05A18393 | Aradu.A05  | 93719797  | 93719811 | TGCTTCTAAAAGAAGAAATAAGAGCA  | GGGGTAGAAGATGAGGAGGAA       | 1                |                      |
| Ad05A18399 | Aradu.A05  | 93751216  | 93751233 | AATAGTATTTACCATGAATGACCAA   | CAATTACGATCACTCTCAACCAA     | 1                |                      |
| Ad05A18403 | Aradu.A05  | 93763724  | 93763738 | CCTTCCATCCTGCCCTATTT        | GCCACAGTACATGCTCAAATG       | 1                |                      |
| Ad05A18404 | Aradu.A05  | 93770428  | 93770439 | CGTGCATCCTTTCTCCTCAT        | ACACTGGGAGAGTGGGAGTG        | 1                |                      |
| Ad05A18407 | Aradu.A05  | 93778574  | 93778587 | CACCAAGATAACACAAGGTGGA      | CCATTACCTTCAACTTGCCA        | 0                |                      |
| Ad05A18410 | Aradu.A05  | 93788915  | 93788932 | TGCTTGGCTGATGTCAAAAA        | CCGATTCAAATTACACCGAAA       | 1                |                      |
| Ad05A18411 | Aradu.A05  | 93792886  | 93792906 | AAAAGTTCGTCATTGGGCAC        | GCCTGAGAAGAGCAGAAGCA        | 1                |                      |
| Ad05A18414 | Aradu.A05  | 93804598  | 93804617 | TCAAATTTTAAATAACCAACAATGTC  | TCAAATCAATCCAATCCAATC       | 0                |                      |
| Ad05A18415 | Aradu.A05  | 93805426  | 93805451 | TGTTCAAGGCTCTCCGAAGT        | CGCAGGATAAAAGGTCAAGG        | 1                |                      |
| Ad05A18417 | Aradu.A05  | 93807466  | 93807479 | TGATATTTTCGAGTATTTCTTTCAAGG | TGCATATTCTTTTCGTCTTATTAATTC | 0                |                      |
| Ad05A18421 | Aradu.A05  | 93854544  | 93854563 | TCATCATCAAATTTTAAATAACCAACA | TCAAATCAATCCAATCCAATC       | 1                |                      |
| Ad05A18422 | Aradu.A05  | 93856830  | 93856844 | GGATTGCAGGATTCAGGTGT        | CATATGCAGGGTAAGCCACA        | 0                |                      |
| Ad05A18423 | Aradu.A05  | 93857390  | 93857401 | TTTTTCAAGGAAGAATTAACTTTTAGA | AAGTGCATTCCATATGCCGT        | 1                |                      |
| Ad05A18425 | Aradu.A05  | 93861994  | 93862031 | AATGATGGCAACAACGTCAA        | ACCAGTGGATTTAGCGATGG        | 2                | Yes                  |
| Ad05A18426 | Aradu.A05  | 93864049  | 93864068 | CTTGGCGGTCATTCTCTCTC        | CAACGAGGGAACCAAAAAGAA       | 1                |                      |
| Ad05A18430 | Aradu.A05  | 93880668  | 93880699 | AACGAGGGAACCGAAAGAAT        | GGTCATTCTCTCTCGCGAAC        | 1                |                      |
| Ad05A18433 | Aradu.A05  | 93885755  | 93885766 | TGTGATGATGATTAAGGCATTG      | CCATTTGGTTAACATTACACGC      | 1                |                      |
| Ad05A18436 | Aradu.A05  | 93903032  | 93903059 | TTGCCATTTTCCAAATACGA        | ATGTGGCGTTATGTGATTGG        | 2                |                      |
| Ad05A18437 | Aradu.A05  | 93909855  | 93909958 | GGATTAGGGTTGGGAAAAGG        | GCAATGTTTGGGTGATCAAA        | 2                |                      |
| Ad05A18442 | Aradu.A05  | 93949675  | 93949686 | AAGTTGCCGCGTATTTTCAC        | GAAAGCTTTTGACATGGTGATG      | 1                |                      |
| Ad05A18443 | Aradu.A05  | 93950554  | 93950571 | TGGAAGTCTAGGCAAACCT         | TCATGCGAAGCTAAACAAAA        | 0                |                      |
| Ad05A18447 | Aradu.A05  | 93967449  | 93967460 | GCTCGAAACGTACCCATGAT        | GCAAGTGTGAGGAAGAAGG         | 1                |                      |
| Ad05A18450 | Aradu.A05  | 93974133  | 93974160 | AAAATCCTTTTACGGTGGGG        | GGAAGACATGAGTTTGTAGCCA      | 1                |                      |
| Ad05A18453 | Aradu.A05  | 94001178  | 94001247 | GACCATTATGATAAAATTTTGCACC   | AAACAAATGCAATTTTCTCTCTC     | 2                | Yes                  |
| Ad05A18456 | Aradu.A05  | 94009900  | 94009914 | TCAGTGCTCACATCTGCTCC        | GTCTGCAGGGTGGAAACAAC        | 1                |                      |
| Ad05A18458 | Aradu.A05  | 94014618  | 94014635 | TTGGATTTGCTTGATTTTTC        | CGTTTGATTCATGTAGCCGA        | 1                |                      |
| Ad05A18460 | Aradu.A05  | 94019209  | 94019223 | GGATACTCGGAAAGGGAAGC        | ATGGGACAAGGTTTGTATGG        | 1                |                      |
| Ad05A18463 | Aradu.A05  | 94039485  | 94039500 | GGTGAACCGAGCTTGAGATT        | CTCCATCCGGTCTGATTGTC        | 0                |                      |
| Ad05A18464 | Aradu.A05  | 94044892  | 94044905 | ACCATACAGAGTCAAGGCCG        | GCCTCATAGCCTTTTCTC          | 2                |                      |
| Ad05A18465 | Aradu.A05  | 94046103  | 94046120 | GTATGCGGTGCACAAATTCA        | GTTGAATCCTCGGGACGTTA        | 0                |                      |
| Ad05A18472 | Aradu.A05  | 94082457  | 94082470 | GGTTGGTTTATTATCGTGGTCA      | CAAATCCAAAACACCATTCTG       | 0                |                      |
| Ad05A18474 | Aradu.A05  | 94087326  | 94087377 | CCTCCTCATCTTCTGCTGCT        | GCTGCACGTTCTTCTCCTC         | 1                |                      |

| ID         | Chromosome | SSR_start | SSR_end  | FORWARD PRIMER (5'-3')     | REVERSE PRIMER (5'-3')     | Bands in parents | Polymorphism in RILs |
|------------|------------|-----------|----------|----------------------------|----------------------------|------------------|----------------------|
| Ad05A18481 | Aradu.A05  | 94133080  | 94133095 | GGA CTTCTGAAGCGAAGTGG      | TGCAATGCTCAGAAAACGAG       | 1                |                      |
| Ad05A18492 | Aradu.A05  | 94157831  | 94157852 | TTTTCCAACCCGTTCTCATC       | TTTCTTGAGTTTGCGTGCAG       | 1                |                      |
| Ad05A18493 | Aradu.A05  | 94158618  | 94158639 | TTACGGCTCTGCTCCTCAAT       | AAGGGATGAGGAAGGAGGAA       | 2                | Yes                  |
| Ad05A18499 | Aradu.A05  | 94178425  | 94178519 | TTGAACAAATGTAAAATGGGAGT    | CCTTGATCTGCGATGGACTT       | 0                |                      |
| Ad05A18500 | Aradu.A05  | 94180230  | 94180269 | GCAGACCTTCGGATTGAAAA       | TCAGGCATGATTGGCTGTAA       | 0                |                      |
| Ad05A18501 | Aradu.A05  | 94183674  | 94183691 | AAAAATTGGTCAAACCAGCG       | CGACGTTGGCTTAGGAGAAG       | 2                | Yes                  |
| Ad05A18503 | Aradu.A05  | 94195949  | 94195964 | AGCTTCAGGATGACCAGCAG       | TGATAGTGCTCCAGCGAATG       | 1                |                      |
| Ad05A18505 | Aradu.A05  | 94200593  | 94200613 | ATACCTGGCTTTTCGGTGATG      | TGCTCTCTCAATTGGCTTGA       | 1                |                      |
| Ad05A18508 | Aradu.A05  | 94209295  | 94209309 | TGATATACGTGAATCGGGTAACA    | CATTTTCCCTCCAAAACGAA       | 1                |                      |
| Ad05A18509 | Aradu.A05  | 94219656  | 94219667 | CCCGATCAATTTTAATATGCC      | AACAAATGCAATTCTCTCTCTTT    | 1                |                      |
| Ad05A18510 | Aradu.A05  | 94224061  | 94224072 | TGTGCGAACTTGC ACTATCC      | TCAAATGCAATTCTCTCTCTTT     | 1                |                      |
| Ad05A18511 | Aradu.A05  | 94229645  | 94229660 | TTGGCATGCACCTTATGTGT       | TTTGGATGCAATGTTAAACCA      | 2                |                      |
| Ad05A18513 | Aradu.A05  | 94234866  | 94234877 | GATGAAAAGAGGGGACATGC       | TCATGCCAAGCAA AACTAAAAA    | 1                |                      |
| Ad05A18521 | Aradu.A05  | 94292134  | 94292178 | TTTTTCAAAGAAAGTCCCGA       | AAATTTCTTATGACGATGGCTT     | 0                |                      |
| Ad05A18523 | Aradu.A05  | 94292776  | 94292856 | AGTGGGTGGGCACAGTAAAC       | ATGACGCCCAATTTTTGGTA       | 1                |                      |
| Ad05A18525 | Aradu.A05  | 94306112  | 94306129 | CAAGACATTCGTTGACCCCT       | TGTGATGTATGCCTGCCCTA       | 1                |                      |
| Ad05A18526 | Aradu.A05  | 94323108  | 94323121 | CGATTTTGGCTATTTTCTCTTATTC  | TCAAATCGTCCCTGAAAGA        | 1                |                      |
| Ad05A18530 | Aradu.A05  | 94326559  | 94326573 | AAGAAGTTGGGCCTAACACG       | ACAGAAGGAAATCGAAGGCA       | 1                |                      |
| Ad05A18531 | Aradu.A05  | 94327191  | 94327208 | CCTCCTCATCTTCTGCTGCT       | CAAGGTACGTTTCTTGCCTTC      | 1                |                      |
| Ad05A18532 | Aradu.A05  | 94327816  | 94327835 | GGTCGATTTGGCTAGGGAAT       | AAATGCTGTTGAAAGTAAACACCT   | 0                |                      |
| Ad05A18535 | Aradu.A05  | 94330387  | 94330398 | CATTTTGC AAGTTGTGAAGAAAA   | TTCAATAAAAATTGCTGGCCC      | 0                |                      |
| Ad05A18536 | Aradu.A05  | 94330573  | 94330586 | GGGCCAGCAATTTTATTGAA       | ACGAGAAATGTTAGGGCCAA       | 1                |                      |
| Ad05A18537 | Aradu.A05  | 94330760  | 94330950 | AAGTTATAAAAATTGTTGGCCCT    | GCAACAAAGTCAATGTTTTAAATAAG | 0                |                      |
| Ad05A18538 | Aradu.A05  | 94331930  | 94331953 | CCCCTTCTCCTCTCTCGTGT       | TCGAAGTAAAAACAAAATAGCACG   | 2                |                      |
| Ad05A18543 | Aradu.A05  | 94342428  | 94342487 | TGTTCAATTGCTTGTGACTGC      | GGAGGTTTGC GTTTGAGAAG      | 2                |                      |
| Ad05A18544 | Aradu.A05  | 94343589  | 94343609 | CGAGTGTTCTAATTTTGTGCTGTAGA | TCAAATCCGAATCCTTCAA        | 1                |                      |
| Ad05A18545 | Aradu.A05  | 94365355  | 94365366 | TGATGAGGATGCGGTGAGTA       | CGGTGCCGTTTTTGTGATTAT      | 1                |                      |
| Ad05A18546 | Aradu.A05  | 94367109  | 94367166 | GTCGATGGCCACTGATACT        | TCGTATATCGGCACCAATGA       | 1                |                      |
| Ad05A18548 | Aradu.A05  | 94372551  | 94372564 | TGGTTTTCGACGAAGATAGGA      | TTGGACAAAGTTGTGAAGCG       | 2                |                      |
| Ad05A18552 | Aradu.A05  | 94391055  | 94391069 | AGAAAGGCATTACACCACGC       | GCTCATCTCATCACTTTTCATCA    | 1                |                      |
| Ad05A18553 | Aradu.A05  | 94393514  | 94393531 | CAAAACAAAACAAAAGACCAA      | TTTTATTGATGCGATTAAAATTCA   | 0                |                      |
| Ad05A18554 | Aradu.A05  | 94402815  | 94402829 | TAGCAGCATTGAGGAAAGGC       | CAGTTTGACCGGATTTTACACA     | 1                |                      |
| Ad05A18556 | Aradu.A05  | 94417562  | 94417573 | TTGAATCATATGCAATACGTAACA   | CATGCAACAATCAAATATCAAAA    | 1                |                      |

| ID         | Chromosome | SSR_start | SSR_end  | FORWARD PRIMER (5'-3')      | REVERSE PRIMER (5'-3')       | Bands in parents | Polymorphism in RILs |
|------------|------------|-----------|----------|-----------------------------|------------------------------|------------------|----------------------|
| Ad05A18558 | Aradu.A05  | 94419684  | 94419790 | TTCAAAGACGCGATGTAAGG        | TGCGTGCAAGAAGAAGAAGA         | 1                |                      |
| Ad05A18559 | Aradu.A05  | 94419899  | 94419913 | TGTTTCTTGCCTTCCCTTTC        | GAGGAAGAAGAACGTGCAGC         | 1                |                      |
| Ad05A18560 | Aradu.A05  | 94421930  | 94421981 | TCAAAAATAACGTTTTACATTTCA    | GCATATAGCCCCATCATACCA        | 1                |                      |
| Ad05A18562 | Aradu.A05  | 94432630  | 94432722 | TGTGAACAGCTTCTTTGGCA        | CCTCAGCACCTTCTAGCACC         | 1                |                      |
| Ad05A18563 | Aradu.A05  | 94434950  | 94434965 | TGTGAAAAGCCTTGAAGCAA        | AAAACACGTACACGCACACC         | 1                |                      |
| Ad05A18567 | Aradu.A05  | 94440402  | 94440425 | TCCCTCCTTTCCGGATATTT        | TCAAAAAGATTTTAATGAGGCCA      | 1                |                      |
| Ad05A18569 | Aradu.A05  | 94449213  | 94449254 | AAGAAGCGGATAACTTCGTTTTG     | CGAAATAATGCTCTGTTGTTGTG      | 2                | Yes                  |
| Ad05A18570 | Aradu.A05  | 94451471  | 94451542 | GAAATACACGCGCCCAATAC        | AACCGGAAGAAGAAGACGAA         | 1                |                      |
| Ad05A18571 | Aradu.A05  | 94452061  | 94452085 | TCTGCAGAAATGAACTGAACACA     | TCGAATTGAGTGGAATGCAA         | 1                |                      |
| Ad05A18573 | Aradu.A05  | 94463865  | 94463892 | CGGTAATTTGACAGTAATCAACG     | TCCAAAATTCATTGCGTTCTT        | 1                |                      |
| Ad05A18575 | Aradu.A05  | 94477122  | 94477133 | ACTCGAAAGCGCAACACTCT        | TTGTGTCCTTTTGGGTTTCC         | 1                |                      |
| Ad05A18576 | Aradu.A05  | 94481576  | 94481595 | TTGGACAAAGTTGTGAAGCG        | TGGTTTTTCGACGAAGATAGGA       | 2                |                      |
| Ad05A18579 | Aradu.A05  | 94484564  | 94484575 | CTTCGAGGCCGTAATACGAA        | TTGATCTGGTAATGAAATATTAACAA   | 1                |                      |
| Ad05A18580 | Aradu.A05  | 94486941  | 94486958 | TCGAGTTTGGACAACACTGACG      | AAAAGATGCAATTGACACCAAA       | 1                |                      |
| Ad05A18584 | Aradu.A05  | 94507063  | 94507080 | TGGAGGTTATGCTTGGAGTTG       | TCTCGGTCATTTCGTTCAACA        | 1                |                      |
| Ad05A18585 | Aradu.A05  | 94513668  | 94513683 | CCGGTCCGAGCATAGAAGTA        | TTTGTGATTTTTCGGATGCAG        | 1                |                      |
| Ad05A18587 | Aradu.A05  | 94521727  | 94521738 | AAAAATCGCAACTCGAAAGC        | TATCTTCGCAACCGGATCTT         | 1                |                      |
| Ad05A18590 | Aradu.A05  | 94544979  | 94544996 | TCGAGTTTGGACAACACTGACG      | TGACTCAAGGCTCAAACAAAAA       | 1                |                      |
| Ad05A18591 | Aradu.A05  | 94546099  | 94546116 | TGAAAATTCCTCACCTTTTTTC      | GGGTTTCGAATTTTGTAGATGAA      | 1                |                      |
| Ad05A18592 | Aradu.A05  | 94549421  | 94549435 | ACCCCTCCATCCTTCTTCAT        | TGACTCAGAGGTGGAAGCAA         | 1                |                      |
| Ad05A18594 | Aradu.A05  | 94577509  | 94577520 | AGTCTTCACCATCGCGTCTT        | CCCTGCGTTCATCATCTTCT         | 2                |                      |
| Ad05A18595 | Aradu.A05  | 94582402  | 94582419 | GCTCTCACACAGCAACGTA         | TTTGAATGCCATTTTCGGAT         | 1                |                      |
| Ad05A18596 | Aradu.A05  | 94591807  | 94591824 | CAAAGCAACGTTCTCTCTCT        | TGAATGCGATATTGCAGAGC         | 2                |                      |
| Ad05A18599 | Aradu.A05  | 94599686  | 94599700 | TGTGCATGTGGACGATAACA        | TTAGAGATAACAGTCTTCTGTCAAAAA  | 1                |                      |
| Ad05A18606 | Aradu.A05  | 94610724  | 94610739 | TCTGTAATTGCCGGGATCA         | CTGCAAAAAGTTTGGACAGAAT       | 1                |                      |
| Ad05A18607 | Aradu.A05  | 94611277  | 94611308 | AAATATGAGGACCGGGGAAC        | TACATGCAGATACCGCGAAG         | 1                |                      |
| Ad05A18608 | Aradu.A05  | 94612764  | 94612783 | GGAGGATAAACATCATGCCAG       | TTACAGGGTGCCAAAAGTCC         | 1                |                      |
| Ad05A18610 | Aradu.A05  | 94615841  | 94615856 | CGCCAACGTGGTTAAGAATC        | GAGGTACGTAAACTTTCACCTTATCATT | 1                |                      |
| Ad05A18614 | Aradu.A05  | 94626423  | 94626434 | TGTGTTAAGTCTGTTGCACAAAT     | TACCGGGAAGACTTTTCGATG        | 0                |                      |
| Ad05A18616 | Aradu.A05  | 94634339  | 94634364 | AAATCACCAATCCCTTTCCC        | GCGGAAAGCAACAAAGAAAG         | 0                |                      |
| Ad05A18617 | Aradu.A05  | 94642960  | 94643007 | TTTGGATGAGACTTTTCATAACCTT   | TTGAGTAGAAAATAAAAATCCATAAGC  | 0                |                      |
| Ad05A18618 | Aradu.A05  | 94644675  | 94644689 | CGTTTTCCCTCCAAAACAAA        | CGTGAATCGGGTAACAAAGA         | 1                |                      |
| Ad05A18619 | Aradu.A05  | 94648054  | 94648065 | TCACTGTTTTGTTATATGAAATTGAAA | TCCTTGTCTTTATTTTCCAAACC      | 1                |                      |

| ID         | Chromosome | SSR_start | SSR_end  | FORWARD PRIMER (5'-3')      | REVERSE PRIMER (5'-3')      | Bands in parents | Polymorphism in RILs |
|------------|------------|-----------|----------|-----------------------------|-----------------------------|------------------|----------------------|
| Ad05A18620 | Aradu.A05  | 94648735  | 94648779 | GATTGGAGAATCAAGCGGAA        | TTTCTTTGAAGCCTGACCG         | 1                |                      |
| Ad05A18622 | Aradu.A05  | 94668490  | 94668504 | ACCACCTCCACCCTACCAG         | CTAGGCCAAATACCCAACCA        | 1                |                      |
| Ad05A18625 | Aradu.A05  | 94675183  | 94675194 | TTTAGAATGTGTCAATTCATAATCA   | TCTGTGGTTAAAATGGGTAAGGA     | 0                |                      |
| Ad05A18631 | Aradu.A05  | 94697984  | 94697995 | TTTTGGAAATTAACCTATTTTCGTGA  | TGTGCAAACTTCCGTGAAT         | 0                |                      |
| Ad05A18633 | Aradu.A05  | 94703603  | 94703638 | AAAAATGACAGGGCGAAATA        | TTTGGGCTTAGTCCCAGTCT        | 0                |                      |
| Ad05A18644 | Aradu.A05  | 94729450  | 94729463 | CTTGAATGCCATTTTCGGAT        | CCCTCTCACTTGCTCTCACC        | 1                |                      |
| Ad05A18648 | Aradu.A05  | 94733670  | 94733684 | GTGGACGGTAAGGAGTCCAA        | TTCTTGTACATCGCGTCCAG        | 1                |                      |
| Ad05A18650 | Aradu.A05  | 94739949  | 94739984 | AGTGGCCCAACAAAAACATT        | CTTTGCACAATGTACAGCCC        | 0                |                      |
| Ad05A18651 | Aradu.A05  | 94740266  | 94740325 | TTCACATGGAGTTAATCTTCAGAAA   | CCGCTACCCATACAACACCT        | 0                |                      |
| Ad05A18652 | Aradu.A05  | 94740726  | 94740778 | GAAACAAGGCGTTGACCATT        | TCTGTGTTACTTTTGGGGTGT       | 1                |                      |
| Ad05A18655 | Aradu.A05  | 94747360  | 94747377 | GTTATAAATATCCACAAACACAGTGAA | AAGAAAAATAACCCAAAAACACC     | 0                |                      |
| Ad05A18656 | Aradu.A05  | 94748986  | 94749003 | CCCTCTCCTCCCTTGTTTTTC       | TCCGTTGGTAAATTTCGAAGG       | 0                |                      |
| Ad05A18658 | Aradu.A05  | 94759044  | 94759089 | TTGTCCATAAATCCGTCGGT        | AGTCGACGCTGAAAGAGGAG        | 2                | Yes                  |
| Ad05A18661 | Aradu.A05  | 94762020  | 94762031 | CCCTTTCCTAATTCCCAAA         | CCAACGCTAAAAGCTAGAAAA       | 2                |                      |
| Ad05A18670 | Aradu.A05  | 94791708  | 94791743 | CTCAGCAAGAAGTTTTGCC         | CACAGACGACAACCACCATC        | 1                |                      |
| Ad05A18671 | Aradu.A05  | 94792175  | 94792188 | GCCCCTAGCATTCCCTCGTAT       | CGTGAAACCATAACAAGATGGA      | 1                |                      |
| Ad05A18672 | Aradu.A05  | 94792455  | 94792466 | AGGCATGCACGTACACTTGA        | AATGACTTGATCTGATCTTGTAGCA   | 2                |                      |
| Ad05A18689 | Aradu.A05  | 94860454  | 94860465 | TCATTCGGCAGATTGTTGAC        | GGTGGGACTAAAAGAAAATAGGAA    | 1                |                      |
| Ad05A18695 | Aradu.A05  | 94870404  | 94870460 | TCATTGTTGGTAATAAGTTGGCA     | CAAATGCAATTCAACCGAGA        | 2                | Yes                  |
| Ad05A18697 | Aradu.A05  | 94875368  | 94875388 | ACATGACAGAGCACAATGGC        | AGCAAATTATCGGGTATGCG        | 2                |                      |
| Ad05A18713 | Aradu.A05  | 94905686  | 94905748 | GCAATTCCTGGAGGATTCAA        | TCATGCCAAGCAAACTAAAAA       | 1                |                      |
| Ad05A18715 | Aradu.A05  | 94914201  | 94914212 | TGAAGTTCTATACGAAAAGGATAAAAT | TTAAAATATAAAACGTCTCTCACCTTT | 0                |                      |
| Ad05A18716 | Aradu.A05  | 94915169  | 94915188 | TCTGCTCTGAATGGAAGCAA        | TCACATTTCCAGCACCAAAA        | 1                |                      |
| Ad05A18717 | Aradu.A05  | 94918723  | 94918734 | AAGCCTTGTTTTGCAGTGAT        | TCTTCCAATTTTCTGCCAT         | 1                |                      |
| Ad05A18723 | Aradu.A05  | 94940994  | 94941026 | CCACCGGATACATAAATGCC        | GCACCAACTTGCGGTTAAAT        | 2                |                      |
| Ad05A18727 | Aradu.A05  | 94954249  | 94954293 | AGTTGTTGATGGCTTTTGCC        | TGAATTGTTGACCATTTTTGGA      | 2                | Yes                  |
| Ad05A18728 | Aradu.A05  | 94954745  | 94954844 | GAGGTTGGAACGGTTTACGA        | TGGAGTCATGGAAGACGAAA        | 0                |                      |
| Ad05A18734 | Aradu.A05  | 94976871  | 94976896 | TTGAGACTTCACGCAAGTGG        | AAGGTTGTGGGCTTCTATGG        | 2                | Yes                  |
| Ad05A18738 | Aradu.A05  | 94987518  | 94987550 | GGCATTTTTGTCCCCTTTTT        | CTTGGGACATTGGTTGAGGT        | 1                |                      |
| Ad05A18742 | Aradu.A05  | 95001994  | 95002051 | GCCCAACACGAGGAAAACT         | TGGAATGGTCGAAAGAAAGG        | 1                |                      |
| Ad05A18747 | Aradu.A05  | 95017604  | 95017625 | GCAGGGTTGACAAACAGGAC        | AACACACAAACCCCATATCCA       | 1                |                      |
| Ad05A18751 | Aradu.A05  | 95032207  | 95032317 | AAAAATTGAGACGCGGGAAT        | GAATGAAAAGTGTCCAATGTGC      | 1                |                      |
| Ad05A18752 | Aradu.A05  | 95034080  | 95034091 | AAATTTGCCTCATGCACACA        | GGCTCGAATGCATGTGATTA        | 1                |                      |

| ID         | Chromosome | SSR_start | SSR_end  | FORWARD PRIMER (5'-3')      | REVERSE PRIMER (5'-3')    | Bands in parents | Polymorphism in RILs |
|------------|------------|-----------|----------|-----------------------------|---------------------------|------------------|----------------------|
| Ad05A18753 | Aradu.A05  | 95034227  | 95034238 | TAATCACATGCATTCGAGCC        | CAAACCTGCACCCAAAAACCT     | 1                |                      |
| Ad05A18754 | Aradu.A05  | 95042943  | 95042982 | GCATTTTAGTGACCCGCAAT        | GGCCGTATTGTTGCTCTGTT      | 1                |                      |
| Ad05A18755 | Aradu.A05  | 95044427  | 95044456 | CACGACAGATAGAGTTGTTGCG      | GACGCAGGGACGTAGTTAGG      | 1                |                      |
| Ad05A18760 | Aradu.A05  | 95050745  | 95050780 | AATCAGCCACCAAAGTCAGC        | TGCAAATTTATTGGAAGAGGA     | 1                |                      |
| Ad05A18761 | Aradu.A05  | 95050973  | 95050987 | TGCAGCTTTATGTGTTCTTCTTC     | CGAAGATATTGGGTGCAAAA      | 1                |                      |
| Ad05A18762 | Aradu.A05  | 95051515  | 95051529 | GCAAAACAAAAACAACTTGAGAA     | CCTTTTTCCCTTCCTCATCC      | 1                |                      |
| Ad05A18763 | Aradu.A05  | 95053244  | 95053255 | CTGTACACACACTGGCCACC        | GAAGGCTTTGGCTTTTACC       | 1                |                      |
| Ad05A18766 | Aradu.A05  | 95057681  | 95057694 | GAGCTCCTGACTCAACCTGC        | GGATACCTGAAGCGAAGTGG      | 1                |                      |
| Ad05A18770 | Aradu.A05  | 95066018  | 95066032 | CAATGTTAATGGTGTTAGTGTTAATGG | CAGCCACTTTGATTTCCAAC      | 1                |                      |
| Ad05A18771 | Aradu.A05  | 95077232  | 95077243 | GGGGCTGAAAAGAAGAAAAAGA      | CCATCCAATTTGTTTGTGGA      | 1                |                      |
| Ad05A18773 | Aradu.A05  | 95097301  | 95097312 | TGCGAGAAAAATTCCATTCC        | TTCGAAGAAGAGCAAATCGAA     | 1                |                      |
| Ad05A18780 | Aradu.A05  | 95103054  | 95103077 | TGAAGAAGAGAGAAAAGGACCG      | TCTATACCCCATATTCGCCG      | 1                |                      |
| Ad05A18783 | Aradu.A05  | 95120872  | 95120891 | AAGCACATTCATCCACCACA        | ATGACAATGGCTTCTTTGCC      | 1                |                      |
| Ad05A18785 | Aradu.A05  | 95121707  | 95121730 | CATGAGATCCACGTCCTCCT        | GTGGCTGGTAAACTTGGCAT      | 1                |                      |
| Ad05A18789 | Aradu.A05  | 95127105  | 95127128 | CATCACAAAGATTTAAACCCAA      | TCATCAAAGCCCTTATTTCCA     | 1                |                      |
| Ad05A18792 | Aradu.A05  | 95145050  | 95145108 | CATACATTTGCCAGCCTTCA        | AGGTCAGCTGGACCAAACC       | 2                |                      |
| Ad05A18797 | Aradu.A05  | 95159897  | 95159911 | TGTGGGTATGGCTATGGGT         | TGCATTCCTGAACAATCTG       | 1                |                      |
| Ad05A18799 | Aradu.A05  | 95165426  | 95165491 | ATGGCAAAAATTCGATGATG        | TGGCTTCTACTTCTCCTCCTCA    | 2                |                      |
| Ad05A18801 | Aradu.A05  | 95173478  | 95173518 | GTGCTGTTGGTGGAGGAAGT        | AGTTTTTCGCCAGAATCGAA      | 1                |                      |
| Ad05A18814 | Aradu.A05  | 95204294  | 95204311 | CAATGGTGTGGTGGTGAGAG        | GAGGGAGGAAATGGTAGAGACC    | 1                |                      |
| Ad05A18820 | Aradu.A05  | 95212728  | 95212751 | CAGCAATTAGTTTTAGAAGATGATGG  | TCTAACAGTGAGAATAAACGATTGG | 2                | Yes                  |
| Ad05A18825 | Aradu.A05  | 95230536  | 95230550 | GCTACCGACCCTAACCTTC         | CCTGGTGCAACCTCATTCTT      | 1                |                      |
| Ad05A18830 | Aradu.A05  | 95236825  | 95236839 | TTGCAGCACTCCAAGAATTG        | GGCAGGTAAACTGGTGGAA       | 1                |                      |
| Ad05A18831 | Aradu.A05  | 95237351  | 95237386 | CCCTCCCCTTTCTTTCTCC         | CCATGCCATAAAATAAATTGGA    | 1                |                      |
| Ad05A18835 | Aradu.A05  | 95256554  | 95256568 | GGGGTTAAGTACGATTTTGGTC      | ACTCCTACGAAGGGGGAAGG      | 1                |                      |
| Ad05A18837 | Aradu.A05  | 95268629  | 95268649 | TGCATATGATCCCAAACCAA        | GACCATTGGTTTTATTGGC       | 1                |                      |
| Ad05A18843 | Aradu.A05  | 95276067  | 95276090 | TCTGCATATGTGTGCGGATT        | TGTCGTGCATTTGATTTGTG      | 2                |                      |
| Ad05A18845 | Aradu.A05  | 95284691  | 95284714 | CAATTGTGGTCCCTCCTTA         | AGAATCAGTGAGCACACCCC      | 2                | Yes                  |
| Ad05A18846 | Aradu.A05  | 95284891  | 95284905 | GGGGTGTGCTCACTGATTCT        | GCATGTGCAGCCTCAAATA       | 1                |                      |
| Ad05A18852 | Aradu.A05  | 95309631  | 95309642 | TCTCGTGCTGATAACGTGTTG       | CAAATGCAATTCTCTCTTTTTG    | 1                |                      |
| Ad05A18854 | Aradu.A05  | 95315833  | 95315844 | ATGGGTATGATGGTTGTGGC        | CAAGGCCTCAATACCTCAA       | 1                |                      |
| Ad05A18860 | Aradu.A05  | 95336974  | 95336988 | GAGCAATCGTGCTGCATTTA        | GCTCTTACAATCAGGTCCGC      | 1                |                      |
| Ad05A18861 | Aradu.A05  | 95337125  | 95337139 | GCGACCTGATTGTAAGAGC         | AATGGTTAGGGATTGGGGAG      | 0                |                      |

| ID         | Chromosome | SSR_start | SSR_end  | FORWARD PRIMER (5'-3')     | REVERSE PRIMER (5'-3')      | Bands in parents | Polymorphism in RILs |
|------------|------------|-----------|----------|----------------------------|-----------------------------|------------------|----------------------|
| Ad05A18862 | Aradu.A05  | 95340551  | 95340564 | TACCACATGTCACTCTTTTATTGTAA | ATTAAGTGCCGAATTGCCTG        | 1                |                      |
| Ad05A18867 | Aradu.A05  | 95367014  | 95367025 | ATGGCCAATTAGCTCTCCCT       | CCAGCTGGCTGATAGGTTGT        | 1                |                      |
| Ad05A18870 | Aradu.A05  | 95388390  | 95388401 | TTTGCCCAAGTCAAAAACCTC      | ATCAGAATAGCGTCGGCTTG        | 1                |                      |
| Ad05A18877 | Aradu.A05  | 95413587  | 95413604 | GCTCATAGCGAAGGCGACTA       | ATCGTTGCTCATCCCCTTAC        | 1                |                      |
| Ad05A18880 | Aradu.A05  | 95422441  | 95422458 | TCTCAGCTGCTCGTGAAATC       | GGGGCCATACTGCTATGTA         | 1                |                      |
| Ad05A18883 | Aradu.A05  | 95429648  | 95429671 | TTGTGCTGTTTATAAACTTGAGC    | TTGGATATGAATAAATGTGTAATTGAA | 2                |                      |
| Ad05A18885 | Aradu.A05  | 95448626  | 95448643 | TGCCAACGACGATAAACAAA       | TCTTTCCACCAACTGCTCCT        | 1                |                      |
| Ad05A18890 | Aradu.A05  | 95459277  | 95459291 | CCACATACTGTTACGGCACG       | TTCTCCTCCTCGTCTTCTGC        | 1                |                      |
| Ad05A18896 | Aradu.A05  | 95466139  | 95466186 | ATTTTGTCCCACGTGAAAGG       | TTGGATATGAATAAATGTGTAATTGAA | 2                |                      |
| Ad05A18898 | Aradu.A05  | 95480989  | 95481000 | AAGCCGATCCAACAGTGAAC       | GGGGGAGATTTGTTGGATT         | 1                |                      |
| Ad05A18904 | Aradu.A05  | 95517385  | 95517400 | TCGTGGTTTACTGTGATTGA       | CGCATCATGTGGTAAACAGG        | 1                |                      |
| Ad05A18908 | Aradu.A05  | 95539114  | 95539131 | TGGCCAGAATGAATAGGGAC       | GGAATCTTGTGTTGCTTTTCCA      | 1                |                      |
| Ad05A18909 | Aradu.A05  | 95543441  | 95543452 | TCCCTTTCAGGATATGAGTGC      | CCGCTCCCAAATACTTTCA         | 1                |                      |
| Ad05A18912 | Aradu.A05  | 95558610  | 95558627 | GAGTCCATTTTGAAGGCAA        | GTGGTGTGTTGGTGGAGGTTGT      | 1                |                      |
| Ad05A18914 | Aradu.A05  | 95572872  | 95572889 | TGTAGCACCTTCTCTGCCT        | CACCCACAGTCACCATCATC        | 1                |                      |
| Ad05A18916 | Aradu.A05  | 95589949  | 95589970 | TGCCGAATTGAGGAGTAACA       | GAACATAAAGGGCCACCAGA        | 1                |                      |
| Ad05A18918 | Aradu.A05  | 95595344  | 95595357 | CTGTGGATCTCCCTCAGAGC       | ACTCAACTCTAAGACGCCGC        | 1                |                      |
| Ad05A18923 | Aradu.A05  | 95613561  | 95613575 | TCATCATTGCTGCTGCTACC       | CAAGAAGACGCTGAAGAAGGA       | 1                |                      |
| Ad05A18924 | Aradu.A05  | 95613890  | 95613917 | TTGACAAATTAATGTGAGTTACCAA  | CATAGCACACAAATTCGCACA       | 2                | Yes                  |
| Ad05A18932 | Aradu.A05  | 95630418  | 95630431 | ACGAAGTCTTCAATGCCAC        | TCCGTGGGTACGGTAATGAT        | 0                |                      |
| Ad05A18937 | Aradu.A05  | 95641272  | 95641299 | AATCCGTAGCAAACACCTTG       | TATTGGTAAAAATTCCGGGCG       | 1                |                      |
| Ad05A18938 | Aradu.A05  | 95641442  | 95641457 | CACATTAAGTCGACTGCGCC       | GGAAGTTTTATGTGCGACCG        | 1                |                      |
| Ad05A18944 | Aradu.A05  | 95656166  | 95656193 | TGGGATTGCTTTTACTTCCC       | ATCATTGCTTGTGCCTTC          | 1                |                      |
| Ad05A18947 | Aradu.A05  | 95676378  | 95676391 | GTTGCTGGGTAAAGACCGAA       | ATCATTGCTTGTGCCTTC          | 1                |                      |
| Ad05A18949 | Aradu.A05  | 95680313  | 95680326 | TTGTCAAAAAGGTAGTGTGACAAG   | TGGGGAGAGAAAGTGGACAT        | 1                |                      |
| Ad05A18961 | Aradu.A05  | 95710113  | 95710139 | TGCTGTTGGACTCAAAGGTG       | TGGTAGGAGGGGACAGAAGA        | 2                | Yes                  |
| Ad05A18964 | Aradu.A05  | 95712335  | 95712346 | GTTTATGTCGCACACACACA       | TGGCAGAGAGAATGATGCAC        | 1                |                      |
| Ad05A18965 | Aradu.A05  | 95713521  | 95713535 | AACGACAATGACGACGAACA       | AAGCTTCCATCAACGACACC        | 1                |                      |
| Ad05A18968 | Aradu.A05  | 95718808  | 95718821 | CACTTGAGAAAATGCAATGTGA     | ACTTGATGAGCTGGACGGTT        | 1                |                      |
| Ad05A18970 | Aradu.A05  | 95725698  | 95725719 | GAGAAGAAGTTAGAAAGGGGTGG    | CATCTCCTGGGGTCACACTT        | 1                |                      |
| Ad05A18971 | Aradu.A05  | 95726986  | 95726999 | GCGTCTGGAGTTTCTGCAT        | TCGTAACAACAAGATGGTGTGG      | 1                |                      |
| Ad05A18976 | Aradu.A05  | 95742950  | 95742973 | ACTACGGTCTTGCCGATGA        | CCATCCAGAGGTGGTCAAAT        | 0                |                      |
| Ad05A18978 | Aradu.A05  | 95745016  | 95745029 | AAGAATATGCGTTTGGGGAA       | TTTGCCTGCATGCTTTATGT        | 0                |                      |



| ID         | Chromosome | SSR_start | SSR_end  | FORWARD PRIMER (5'-3')      | REVERSE PRIMER (5'-3')      | Bands in parents | Polymorphism in RILs |
|------------|------------|-----------|----------|-----------------------------|-----------------------------|------------------|----------------------|
| Ad05A18982 | Aradu.A05  | 95747665  | 95747679 | TGCGTATTTGCTGTAACCTTTCAA    | TCCTCTTTCAAGTAATTTTGTAGCA   | 1                |                      |
| Ad05A18983 | Aradu.A05  | 95748070  | 95748084 | CCTCTTCATCTTCTGCTGCTT       | TCATCTTTCAAATAATTTTGCAGC    | 1                |                      |
| Ad05A18987 | Aradu.A05  | 95752916  | 95752927 | TGAAAAGGGATACTTCATTTTATTTTT | CAAATGGTAGAACCAAGGGC        | 0                |                      |
| Ad05A18989 | Aradu.A05  | 95762848  | 95762953 | CGATCACCGCTTCTTTTTTCT       | CATCCATCACACCAACCAAAA       | 1                |                      |
| Ad05A18990 | Aradu.A05  | 95763098  | 95763150 | TGGATGGTGATAGAGTGGCA        | GGTCCCTAAAGTAGGGGCTG        | 1                |                      |
| Ad05A18991 | Aradu.A05  | 95763616  | 95763635 | TAGCAACTCGAATGGCAGTG        | GCAAATTTGGTCCGGTTAGA        | 1                |                      |
| Ad05A18992 | Aradu.A05  | 95764361  | 95764378 | TGTGCGAAGAAAATACGCAG        | TAGGGCAATAGAAACGTGGG        | 2                |                      |
| Ad05A18993 | Aradu.A05  | 95768400  | 95768415 | AAACCAGTTGAACCCTGGTC        | GATTGGCAGGGAGAGAGAGA        | 2                |                      |
| Ad05A18996 | Aradu.A05  | 95795679  | 95795758 | TCCCGATTAATGCCAATTATAC      | GGTCTCCTTCCAATTCTTTTCG      | 1                |                      |
| Ad05A19006 | Aradu.A05  | 95829254  | 95829269 | TCCCTCTAGTATTTCTCGTTCTGA    | GAAACGGTGAAGAAGCAAG         | 1                |                      |
| Ad05A19010 | Aradu.A05  | 95843377  | 95843403 | CTCCACCATGGCAGTACCT         | GAAGGAGACGTAGCGACGAG        | 1                |                      |
| Ad05A19016 | Aradu.A05  | 95864894  | 95864911 | TCACCTAGTGAATTGAACATCCA     | TGCAAATCGAGAACTTTTAGGA      | 2                |                      |
| Ad05A19019 | Aradu.A05  | 95873437  | 95873458 | TAATTCCTTGTTTGTGGCCG        | GGAAAGAGCTTTGGCATTG         | 1                |                      |
| Ad05A19025 | Aradu.A05  | 95896165  | 95896178 | TTTGAAGCCCGTAAAACAGC        | CCGGCCAAAACTAAACAAA         | 2                |                      |
| Ad05A19029 | Aradu.A05  | 95900582  | 95900595 | AACTGCACCCCTAGTTGGTT        | ATGTGGCGTGACGTAATTGA        | 2                |                      |
| Ad05A19034 | Aradu.A05  | 95903069  | 95903083 | ATTGCATTCAGAGCTCCGTC        | CAAGAAAATCTCCGAGCGAC        | 1                |                      |
| Ad05A19037 | Aradu.A05  | 95912486  | 95912518 | CCTAATTGGCATGAACAAACAA      | TCGAAGCATGGTTATTGAGAAA      | 0                |                      |
| Ad05A19041 | Aradu.A05  | 95942193  | 95942214 | AAAATCAATCACATGCTGGC        | TTCGTCTGATGTTTTGGCTG        | 1                |                      |
| Ad05A19047 | Aradu.A05  | 95958163  | 95958198 | AACACCCCATCACAAACAC         | TTGTTTTGTTGTTTGTCTCTGC      | 1                |                      |
| Ad05A19049 | Aradu.A05  | 95966237  | 95966258 | GGTCAACAGTGGTCAAACCC        | TGATATTCAGGTGAATCCATGC      | 1                |                      |
| Ad05A19053 | Aradu.A05  | 95992235  | 95992252 | CGTTTGATTTCATGTAGCCGA       | TAAAAGAAGAACATTCATTGACTCTAA | 1                |                      |
| Ad05A19058 | Aradu.A05  | 96004485  | 96004496 | TTCACATAAAATCTCTGATTTCTAACA | CGAACACAAATTAGTATTAGCGTGA   | 0                |                      |
| Ad05A19062 | Aradu.A05  | 96014907  | 96014926 | ACTGCTGTAGGGATGGTTGG        | TCAGCCAACTATTTTCAGGACA      | 0                |                      |
| Ad05A19063 | Aradu.A05  | 96023147  | 96023161 | CAACACAACAGATGGTACATGC      | ATGAAGCCTTTTGTCCCT          | 2                |                      |
| Ad05A19065 | Aradu.A05  | 96028450  | 96028537 | CGTCACTTTGTCCCATGTTG        | GGAAGAGGGACCATGAAAAA        | 1                |                      |
| Ad05A19068 | Aradu.A05  | 96029103  | 96029122 | TTGCATCACAACACAAAAGAA       | CTTGGCATGAGAGGCCTTAG        | 1                |                      |
| Ad05A19069 | Aradu.A05  | 96029352  | 96029375 | CTAAGGCCTTCATGCCAAG         | CCCTGATGATGAACAAGGCT        | 1                |                      |
| Ad05A19070 | Aradu.A05  | 96030136  | 96030149 | GTGCAGCAGCAAGTAGGACA        | TCCCAAGTTGAAAAGAACAAA       | 1                |                      |
| Ad05A19071 | Aradu.A05  | 96030306  | 96030317 | TTTTGTTCTTTTCAACTTGGGA      | CAGAAAGGAAGGAATGCAGC        | 1                |                      |
| Ad05A19072 | Aradu.A05  | 96031100  | 96031134 | AAATGTTCCCTCTCCCTACCA       | GGACCCATCCATCTGCTCTA        | 1                |                      |
| Ad05A19073 | Aradu.A05  | 96031433  | 96031518 | CACCACCTGTACACACCTC         | TCTTCATTGCTATGAGTGGTGG      | 1                |                      |
| Ad05A19074 | Aradu.A05  | 96031639  | 96031656 | TTGTCACAAATGCCAATGCT        | TGGAGTTGTTGGGACTAGGG        | 1                |                      |
| Ad05A19075 | Aradu.A05  | 96031896  | 96031913 | CCCAAACCACCATCACTTCT        | TCAACCAACATAGTCCAAATGC      | 1                |                      |

| ID         | Chromosome | SSR_start | SSR_end  | FORWARD PRIMER (5'-3')       | REVERSE PRIMER (5'-3')      | Bands in parents | Polymorphism in RILs |
|------------|------------|-----------|----------|------------------------------|-----------------------------|------------------|----------------------|
| Ad05A19077 | Aradu.A05  | 96036095  | 96036114 | TGTGATTTTCGAAAAATAAAAAGAAACA | TATGTACAAAACCCCACCCG        | 1                |                      |
| Ad05A19080 | Aradu.A05  | 96041845  | 96041874 | ACTGCTGGCCAAGAAAAGGTA        | GGCAAAAAGAAAACAAAAGGG       | 1                |                      |
| Ad05A19083 | Aradu.A05  | 96043771  | 96043790 | AGGAACTGGGATCTCACTGG         | CATATCTTGGACCCGGCTTA        | 1                |                      |
| Ad05A19085 | Aradu.A05  | 96049000  | 96049013 | TGAGGAACTCTTTTAGCTCACCA      | AGCAATCACTTTTGGCCTTG        | 1                |                      |
| Ad05A19088 | Aradu.A05  | 96060604  | 96060615 | ACGAGAGAGAGGGGGAGAGA         | TTTGATTAGACATCTAAATTTACCA   | 0                |                      |
| Ad05A19089 | Aradu.A05  | 96069150  | 96069164 | TAGCGGGGTTTACACAGGTC         | AGGATGAAAACGCGAAGAAA        | 1                |                      |
| Ad05A19091 | Aradu.A05  | 96071802  | 96071813 | TTGGAATCGTTTAAACAAAAGG       | TTCAGCCTTCATAATTATTTTTCTCTC | 0                |                      |
| Ad05A19092 | Aradu.A05  | 96074841  | 96074868 | TGTTGTGCAACTTATTTTTCCG       | CAGGCATTTTAGAAGGTGGG        | 1                |                      |
| Ad05A19093 | Aradu.A05  | 96075413  | 96075432 | GGTGCTTGAGATGGGAATGT         | ATGGCAACAGTGGATGGAGT        | 1                |                      |
| Ad05A19094 | Aradu.A05  | 96079528  | 96079548 | TTCTCATCGAAGCAAGCAAG         | GGCTCATTCGATTTGGTGTT        | 1                |                      |
| Ad05A19096 | Aradu.A05  | 96082262  | 96082324 | TTTGGTTGCAATTGATGACG         | GCCTCATTCGTTTTGGTGTT        | 2                | Yes                  |
| Ad05A19100 | Aradu.A05  | 96095957  | 96095968 | GAGACAATTTCTCCGAGGCA         | AGAAGGGAGAGTGGAGAGGG        | 1                |                      |
| Ad05A19101 | Aradu.A05  | 96097336  | 96097363 | GTTGGGGGAAAATCCAGTT          | CGTTTTTGGTGATTAACCCCT       | 0                |                      |
| Ad05A19111 | Aradu.A05  | 96112362  | 96112373 | GTTGGGTCAGAGGACTTTGG         | TGCATTTTTGAAGGTGGGTT        | 1                |                      |
| Ad05A19114 | Aradu.A05  | 96117514  | 96117534 | TTCTCATCGAAGCAAGCAAG         | GGCTCATTCGATTTGGTGTT        | 1                |                      |
| Ad05A19116 | Aradu.A05  | 96119587  | 96119699 | ACACCAAAAATTCGTTGCAT         | CGTTCCTCTTCCTCTTCCT         | 2                | Yes                  |
| Ad05A19121 | Aradu.A05  | 96130272  | 96130286 | CGATTTTCAATTATCAACTTCACA     | AAGGAAAGGAAAGGGACAAGA       | 1                |                      |
| Ad05A19122 | Aradu.A05  | 96130509  | 96130522 | CAATTTGCAATGGAATCGTT         | TCAATGTGTCAAGCCTTATTCTT     | 2                |                      |
| Ad05A19124 | Aradu.A05  | 96132749  | 96132766 | ACGACACGAAATACGTGCAT         | TTGGACATGACATTCATCCG        | 1                |                      |
| Ad05A19128 | Aradu.A05  | 96138913  | 96138924 | CCATCCATTTTCTTTCTCAGC        | TTGGATTTAGGGGATTCAGG        | 1                |                      |
| Ad05A19129 | Aradu.A05  | 96140655  | 96140699 | AGGTAGAGTTAAATTGAAGAATAACGA  | GGCTATTTGGTTTTTCAAGGC       | 1                |                      |
| Ad05A19133 | Aradu.A05  | 96151451  | 96151464 | TTTGTTTTCGTTGTTTGTGTTTG      | TTTACAACAATCCCCGAGG         | 0                |                      |
| Ad05A19136 | Aradu.A05  | 96157266  | 96157279 | GCAACTTATTTTTCCGCACC         | TTTACAACAATCCCCGAGG         | 1                |                      |
| Ad05A19137 | Aradu.A05  | 96159832  | 96159870 | AATTGCACACACGTGCACAC         | TGTGCGCTTTCTTCAACAAC        | 1                |                      |
| Ad05A19138 | Aradu.A05  | 96168242  | 96168253 | TGTGAACCAGAACATAGCGG         | AAAAATCGAGGAAATGCGTG        | 1                |                      |
| Ad05A19142 | Aradu.A05  | 96175495  | 96175542 | ACGCCGAGTTGATCTTCTA          | CATCCATAAAGCAAGCCGAT        | 2                | Yes                  |
| Ad05A19149 | Aradu.A05  | 96197292  | 96197319 | CCTTGAAGCAAAAAGAAACAGC       | ACGCACTTGGTCTCGACTCT        | 1                |                      |
| Ad05A19150 | Aradu.A05  | 96204163  | 96204200 | ATTGTTGCTGGAAAATTGGC         | AAATCAGTTTCCGTTCAACC        | 2                |                      |
| Ad05A19151 | Aradu.A05  | 96207345  | 96207395 | TGTGAATTCCTTCCCTTA           | GGATTCTCTAATTATCAAACCTCACC  | 2                |                      |
| Ad05A19152 | Aradu.A05  | 96208897  | 96208914 | CGCTAATCCCCGAAATTCTA         | AAGACAGGAGAATGGCGAGA        | 1                |                      |
| Ad05A19154 | Aradu.A05  | 96213939  | 96213952 | ACCGAAATCATAGCCACCAG         | TTGACAATGATACATTAGCAAAAAT   | 0                |                      |
| Ad05A19155 | Aradu.A05  | 96217772  | 96217785 | TCAAGAAAACAAAATTAATCATCACA   | GCCACTTGTGATCCAACAAC        | 1                |                      |
| Ad05A19157 | Aradu.A05  | 96222850  | 96222864 | ATGATTGGCACTCAAGGGAC         | TGCGCCTTTTGATATGTTTG        | 1                |                      |

| ID         | Chromosome | SSR_start | SSR_end  | FORWARD PRIMER (5'-3')      | REVERSE PRIMER (5'-3')      | Bands in parents | Polymorphism in RILs |
|------------|------------|-----------|----------|-----------------------------|-----------------------------|------------------|----------------------|
| Ad05A19158 | Aradu.A05  | 96223669  | 96223684 | TCCCAAATCAATTCAAACCAA       | TTGTTGTGATTTTGAATAATTGGA    | 1                |                      |
| Ad05A19163 | Aradu.A05  | 96230842  | 96230855 | GGGTA AACAAAATCGCCAA        | ACACCTGAAGCGAAGTGGTT        | 1                |                      |
| Ad05A19165 | Aradu.A05  | 96232268  | 96232279 | AAGAAATCGAAGCCGGAAGT        | ATAAAGAAAGCCTACGGCGG        | 0                |                      |
| Ad05A19166 | Aradu.A05  | 96232450  | 96232477 | CCGCCGTAGGCTTTCTTTAT        | CGAAAATTTTGTAAAGGTGGG       | 1                |                      |
| Ad05A19167 | Aradu.A05  | 96234388  | 96234399 | AGGAGCCTTGAAAAATGGGT        | TATGGAGAGGCAGGGTTTTG        | 2                |                      |
| Ad05A19170 | Aradu.A05  | 96241659  | 96241776 | TGATTGATGATGGATTGTTGC       | CTCTGATCTTCCACCCCAA         | 1                |                      |
| Ad05A19174 | Aradu.A05  | 96245018  | 96245031 | CGTCTTCTGCTTCTTCTGGG        | TGCATCACACCAACCAA ACT       | 1                |                      |
| Ad05A19176 | Aradu.A05  | 96252758  | 96252777 | CAAAACGGGAGTACTCTTGGTAA     | CCATGCTCACTGAGAGGTCA        | 1                |                      |
| Ad05A19180 | Aradu.A05  | 96268553  | 96268567 | CCTTCCAGATCCGACAAGAA        | CCTTCCTTCCCCTTAACTGC        | 1                |                      |
| Ad05A19181 | Aradu.A05  | 96269259  | 96269300 | ACCTTCTAGGGAGCAGAGCC        | CAATCCCAATGGAAAAGGAA        | 2                |                      |
| Ad05A19182 | Aradu.A05  | 96270265  | 96270284 | TTTTCAAGGGGATCAAGTTCA       | ATAAGTCCCAATCCCAACC         | 1                |                      |
| Ad05A19186 | Aradu.A05  | 96284130  | 96284191 | GAGCGTAGGTTGAGGAGTGC        | ACCCAAACAAAACCAGCAAG        | 1                |                      |
| Ad05A19188 | Aradu.A05  | 96293571  | 96293585 | TCAGCAAGCAACAGAAGCAT        | TTATAATCTCGCTGGGGTGG        | 1                |                      |
| Ad05A19189 | Aradu.A05  | 96293805  | 96293899 | TTCAAACGTATGCATATACTCATTA   | GGAGAAGATGATGATGAAAACG      | 0                |                      |
| Ad05A19190 | Aradu.A05  | 96296154  | 96296169 | GCATTGGCATTGAAGTGAGA        | AATAACGTTAATGGGCGATCA       | 2                | Yes                  |
| Ad05A19193 | Aradu.A05  | 96302568  | 96302588 | CCCAACATGCACTTTGAACA        | CCCTGGCTCTCTTCTCTCT         | 1                |                      |
| Ad05A19194 | Aradu.A05  | 96302728  | 96302739 | AGAGGAAGAGAGAGCCAGGG        | GGAGATCGTGGAAGCCATTA        | 1                |                      |
| Ad05A19203 | Aradu.A05  | 96325626  | 96325657 | CGGACACTTTTGCCCTTTTA        | ACGGATCTCTCACCATGTCC        | 2                | Yes                  |
| Ad05A19204 | Aradu.A05  | 96339213  | 96339224 | TCGCAGCTCTGTTCTTTTT         | CCCTCAACATACTCAGCCGT        | 1                |                      |
| Ad05A19208 | Aradu.A05  | 96346426  | 96346441 | TACTTCTTTGAATTTGGCGAC       | TGGCTAATTTAATGTGCGAA        | 2                |                      |
| Ad05A19209 | Aradu.A05  | 96348949  | 96348963 | CGTCTCTGTCAGAACCACCA        | GGTGAGACAGAGAAGGCAGG        | 1                |                      |
| Ad05A19212 | Aradu.A05  | 96356750  | 96356767 | TGCAACGTTTCTCAACGTA         | AACGCGAAAAAGGAAAACAA        | 0                |                      |
| Ad05A19217 | Aradu.A05  | 96376422  | 96376435 | TTGGCCAATTGCAGACAATA        | GGAGCTGGTGATGGATTTTC        | 1                |                      |
| Ad05A19220 | Aradu.A05  | 96386734  | 96386745 | TGCCTCTAACTTTTTCGGGA        | TACGAACTAAGGCCGGCTA         | 1                |                      |
| Ad05A19223 | Aradu.A05  | 96399278  | 96399297 | AACTTGTGTGGTTTCGTGCTG       | CCATTGCAGATTGCATAACG        | 1                |                      |
| Ad05A19227 | Aradu.A05  | 96417902  | 96417979 | TGATTTTAGTCGCTTTACATGGG     | TTTTGGTCTATTATCGGAATGG      | 1                |                      |
| Ad05A19232 | Aradu.A05  | 96447117  | 96447128 | GAGAAAGGAGAAAGTGGGGG        | TAGATGATGCGTGGGCATAG        | 0                |                      |
| Ad05A19233 | Aradu.A05  | 96447391  | 96447426 | CGTGAGAAAATCAGTTACCAAAA     | CCATATTTTTAAATTTTTTCGAGAGTT | 1                |                      |
| Ad05A19234 | Aradu.A05  | 96449889  | 96449900 | TTTTAAAACCCACAATCTTAAATGTT  | AGAGTGAGTTGTGCCAATCG        | 1                |                      |
| Ad05A19239 | Aradu.A05  | 96460701  | 96460716 | CCATCTCCCCTCTTTGTTGA        | TCGAATTATGTGCATGTAACGA      | 1                |                      |
| Ad05A19244 | Aradu.A05  | 96479128  | 96479145 | CACAGGGCAAAAAGAAAAGG        | GCCAACTCTCATTGACACCA        | 2                | Yes                  |
| Ad05A19246 | Aradu.A05  | 96479795  | 96479808 | TGATCATCACTAGCTACAAGCCT     | TCGTCCGTTTAAATTAATGTCG      | 2                |                      |
| Ad05A19248 | Aradu.A05  | 96484629  | 96484658 | TCATCCTATCTACTTACACCAAAGTGA | TCCGATCCGTCCATTATCTT        | 1                |                      |

| ID         | Chromosome | SSR_start | SSR_end  | FORWARD PRIMER (5'-3')      | REVERSE PRIMER (5'-3')    | Bands in parents | Polymorphism in RILs |
|------------|------------|-----------|----------|-----------------------------|---------------------------|------------------|----------------------|
| Ad05A19250 | Aradu.A05  | 96497275  | 96497307 | TGTGGTTTATTTTTGCTTTCCTC     | CATCTAGACATCACCTTTGCAG    | 2                |                      |
| Ad05A19255 | Aradu.A05  | 96507317  | 96507328 | CCCTATCTGCGGGTTGTA          | TTAGGTTGAACCCGTCCCTA      | 1                |                      |
| Ad05A19259 | Aradu.A05  | 96509711  | 96509740 | ATGATAACAATTGTGAGACAGAATG   | ACATGACAGAGCACAATGGC      | 0                |                      |
| Ad05A19260 | Aradu.A05  | 96519056  | 96519067 | AAGGAGTTTCTTCTCCGCATC       | TCACTTTTCTTTGAAAAATCGAAA  | 0                |                      |
| Ad05A19274 | Aradu.A05  | 96536625  | 96536648 | AAATCATCCTCACACGCACA        | GAACCACACCTCAGCCACTT      | 2                |                      |
| Ad05A19275 | Aradu.A05  | 96537024  | 96537041 | TGCAAATGTTCGTAGCAGGAG       | TCATCATCGTCCAAGTAATTTTG   | 1                |                      |
| Ad05A19277 | Aradu.A05  | 96540342  | 96540371 | TGTATAAGACGGAATTCAAAAACC    | TTTTTGGCAGGCGTTAGTTT      | 2                |                      |
| Ad05A19284 | Aradu.A05  | 96550586  | 96550597 | TTGCTTCTTGTTAGTCAAGCCA      | TTGAACCTTTCTCAACAGGAAA    | 1                |                      |
| Ad05A19287 | Aradu.A05  | 96555237  | 96555285 | CCAACGGTGAACAACCTGAGA       | GGTGGGTGTTAGTGTGGGT       | 0                |                      |
| Ad05A19289 | Aradu.A05  | 96555812  | 96555841 | CTGGTGGGAAGGGTGA            | TGACACAAAATATAACTTCGTTTAA | 1                |                      |
| Ad05A19294 | Aradu.A05  | 96563258  | 96563275 | GATCAGAAAGAAGCCGTTGC        | CAGATTTGACGGTGACGAGA      | 1                |                      |
| Ad05A19295 | Aradu.A05  | 96563511  | 96563552 | AGAGGCAACGGTAGCAACAC        | TGGAGCATCAACAACAACA       | 2                | Yes                  |
| Ad05A19296 | Aradu.A05  | 96563713  | 96563727 | AGAGGCAACGGTAGCAACAC        | AAGAAGCAATTAATGGAGCATCA   | 2                | Yes                  |
| Ad05A19297 | Aradu.A05  | 96569116  | 96569127 | CCTTTCATACCTTGACCCGA        | TGGTGTGGAAAGTGTGGGA       | 1                |                      |
| Ad05A19301 | Aradu.A05  | 96587124  | 96587135 | AGGGAGAATCCCAAGCAGAT        | CGAATCTCAATTATCAACTTCAGG  | 0                |                      |
| Ad05A19302 | Aradu.A05  | 96587407  | 96587418 | CAACCTCATTAGTTATTGATTCAT    | CGGTCTGGTTGTCGCTCTAC      | 1                |                      |
| Ad05A19305 | Aradu.A05  | 96595537  | 96595548 | ATCCGGTATGGGGTGAATTT        | TCGCCTATTTTTACCCATTTT     | 2                |                      |
| Ad05A19306 | Aradu.A05  | 96596063  | 96596206 | ACTCCCGCTTGTTTTACACG        | CGTGAAAGAGGAGAACAACGA     | 1                |                      |
| Ad05A19307 | Aradu.A05  | 96596369  | 96596383 | TCGTTGTTCTCCTCTTTCACG       | TGCGTTGAATCAATCCAAAT      | 0                |                      |
| Ad05A19308 | Aradu.A05  | 96598237  | 96598317 | CAGCAGCAATAAGCCAACAA        | GCTTCTTTTCCCCTACGCTT      | 1                |                      |
| Ad05A19312 | Aradu.A05  | 96601570  | 96601589 | CAGGTGAGGAAATAATGCGAA       | CTCTGGAAAGCAAATCTCGG      | 1                |                      |
| Ad05A19313 | Aradu.A05  | 96603245  | 96603260 | CGCTATTTATTTGAAAACCTTTCGTG  | TAAAGGGAATGACATTATTTGGG   | 0                |                      |
| Ad05A19314 | Aradu.A05  | 96614008  | 96614022 | GAATCAACCAAAATAAATAATCAAAAC | GCTTGTAGCCTAAGTCCCTTCA    | 1                |                      |
| Ad05A19315 | Aradu.A05  | 96617462  | 96617475 | AACCGTCTTAACAGCTTGCG        | TGACGTTACGAGCTACTGCG      | 2                | Yes                  |
| Ad05A19322 | Aradu.A05  | 96657438  | 96657453 | GCGTTTTATCACCCACTTC         | CAGGGGTAAGCCATTTTGAC      | 2                |                      |
| Ad05A19324 | Aradu.A05  | 96661095  | 96661106 | TGTGGAAAAGAGGGTGAACA        | TTGGAGGAAGTTTCTAAAACGAA   | 1                |                      |
| Ad05A19326 | Aradu.A05  | 96663636  | 96663741 | CACACACATGGTGCACAAAA        | CTTTGAGGACAGAAGGCCAG      | 1                |                      |
| Ad05A19327 | Aradu.A05  | 96665737  | 96665754 | TACACCCTTGGGGTGCTTAG        | GGTCGTGACATTGTTGATGC      | 1                |                      |
| Ad05A19345 | Aradu.A05  | 96710235  | 96710254 | CGCAGATCCGCACAATAAT         | TCGCATAATTGAACCTTCTCTTT   | 1                |                      |
| Ad05A19347 | Aradu.A05  | 96724728  | 96724749 | GGAGATGTGGACAGTGGGTT        | TGCCACGTAAGCACATCTTT      | 1                |                      |
| Ad05A19349 | Aradu.A05  | 96732909  | 96732923 | GGGTGGCGTATAGGTTGCTA        | CGCCCTTCTTCTTATCC         | 2                | Yes                  |
| Ad05A19350 | Aradu.A05  | 96736740  | 96736759 | AGGTACGGCGACAATTTCTG        | AGCCACCAAATCCCTTTTCT      | 1                |                      |
| Ad05A19356 | Aradu.A05  | 96758808  | 96758837 | CAGCCATTCAAAGCAAAAT         | CCCAAGAAATGAGGATATTGATG   | 1                |                      |

| ID         | Chromosome | SSR_start | SSR_end  | FORWARD PRIMER (5'-3')      | REVERSE PRIMER (5'-3')    | Bands in parents | Polymorphism in RILs |
|------------|------------|-----------|----------|-----------------------------|---------------------------|------------------|----------------------|
| Ad05A19357 | Aradu.A05  | 96761429  | 96761446 | AACATGTTTTATAAGGGAGTCATAGAT | TTCATGAACCAAATTTTAAACCAG  | 0                |                      |
| Ad05A19362 | Aradu.A05  | 96765145  | 96765162 | TTTGTGGTGTGGTGTGG           | AGCAAATTC AACAGCACCCCT    | 1                |                      |
| Ad05A19363 | Aradu.A05  | 96765309  | 96765385 | TTGCTGTTGAATTTTGCTGC        | AGTGCCAGAATCGAAATCGT      | 2                |                      |
| Ad05A19364 | Aradu.A05  | 96766877  | 96766897 | GGTTTGTCTCATCCCCTCA         | TCCAAGTGAGCTTCAACCAA      | 1                |                      |
| Ad05A19365 | Aradu.A05  | 96767005  | 96767020 | TTGGTTGAAGCTCACTTGGGA       | TCATGGGAAAGATTTGGTCC      | 1                |                      |
| Ad05A19366 | Aradu.A05  | 96767246  | 96767259 | GGACCAAATCTTTCCCATGA        | CCCAAAGTGAGATGGGTTTT      | 1                |                      |
| Ad05A19369 | Aradu.A05  | 96773799  | 96773825 | GCAGGCGATAACCCAATAAAA       | ATTGGCCTGTTTGTTTTTGC      | 2                |                      |
| Ad05A19378 | Aradu.A05  | 96818086  | 96818206 | TGATGCAATGTTTAGGCCTTT       | GCTAATGGATCCGGTGATTT      | 1                |                      |
| Ad05A19381 | Aradu.A05  | 96821767  | 96821782 | CCGACGATAACGAACCCTAA        | GAGCGACGGAAAGACAAGAG      | 2                |                      |
| Ad05A19382 | Aradu.A05  | 96821939  | 96821950 | CCGACGATAACGAACCCTAA        | GATGGCGAGACACAAACAGA      | 2                | Yes                  |
| Ad05A19383 | Aradu.A05  | 96822302  | 96822315 | TAGTTTGACGTGCGAAGCA         | CAGATGTAGGACGTGAGGCA      | 0                |                      |
| Ad05A19385 | Aradu.A05  | 96841733  | 96841759 | TGCGTCCAAAACAGCTACAC        | GATTGTTCCGGGACATCGAAT     | 1                |                      |
| Ad05A19386 | Aradu.A05  | 96845216  | 96845230 | TGAAACCGCTTTTACCCAAC        | TGCGAAAAAGAAGGAGGAGA      | 1                |                      |
| Ad05A19393 | Aradu.A05  | 96858314  | 96858328 | CCAAAATGATTCCAGAGATGG       | ATATGGAAGGATGAAGGCC       | 1                |                      |
| Ad05A19394 | Aradu.A05  | 96861594  | 96861611 | CATGAGGTGGTCAGACGAGA        | TCATCTTTCAGTGTGGTGATG     | 2                |                      |
| Ad05A19398 | Aradu.A05  | 96868392  | 96868403 | AACGACAAAGAGAAGCCTCC        | TACATGCATTCTTGGTGGGA      | 1                |                      |
| Ad05A19399 | Aradu.A05  | 96869203  | 96869235 | AGCTCAGAGGCAACCAACTC        | TGAACTATTCTGCTGCCTGG      | 1                |                      |
| Ad05A19402 | Aradu.A05  | 96885233  | 96885256 | GCAGTAATCGTGCCCAAAAT        | TTAGAGAAGGTGGCGTTTCG      | 1                |                      |
| Ad05A19405 | Aradu.A05  | 96892314  | 96892328 | CTCTTCTCCTCCAACCCC          | GGAGCTCCAGACGATTAACA      | 1                |                      |
| Ad05A19406 | Aradu.A05  | 96892663  | 96892701 | GAAGGAAGGATTATGGTACATTATGA  | CGTTGGTATCTATTAGTGCCG     | 1                |                      |
| Ad05A19407 | Aradu.A05  | 96896450  | 96896467 | ATGGATTGCTCAACTTGGGT        | TTTTTGGGCGGACTGTTTAG      | 1                |                      |
| Ad05A19412 | Aradu.A05  | 96908738  | 96908779 | GTTTGCATGGCTCGGTATTT        | AAAAGTCTAGGAGGCCAGCA      | 1                |                      |
| Ad05A19413 | Aradu.A05  | 96908953  | 96908967 | TAACAAATTTGCTGGCCTCC        | CATTCAAACACATTTAACATTTCCA | 1                |                      |
| Ad05A19414 | Aradu.A05  | 96909604  | 96909615 | CGAGGACGTTTCTTCATTGC        | TGGTGGTTACCATGGATCAG      | 1                |                      |
| Ad05A19415 | Aradu.A05  | 96914484  | 96914495 | TCAAATGAAGAAGAGTAAGACACA    | TTCAATGGTCAATATTCAAATCA   | 1                |                      |
| Ad05A19422 | Aradu.A05  | 96939528  | 96939542 | GACCGGCTCATTCTTACTGC        | AAACCACGAGGAAGGAGGAT      | 1                |                      |
| Ad05A19424 | Aradu.A05  | 96948208  | 96948219 | CAGAACCCTTGTAGGGAGG         | ATTGGTGGCATGAAAGAAGC      | 1                |                      |
| Ad05A19426 | Aradu.A05  | 96953859  | 96953927 | GGTACACCCTCAAAGGGGAT        | TGCCAACTGAAGCATCTGAC      | 1                |                      |
| Ad05A19427 | Aradu.A05  | 96959383  | 96959396 | GCTGTTCTGAATTACGAGGGA       | TGAACTTACACCAGAGCGT       | 1                |                      |
| Ad05A19428 | Aradu.A05  | 96965535  | 96965548 | GGTTTTCGAAACATGGTGTCT       | CCAGGAGGACGTTTCTATGC      | 1                |                      |
| Ad05A19435 | Aradu.A05  | 96986490  | 96986509 | CAGCAGCTCCAAGAAGACCT        | AACCTTGCATAAACCCCTCCA     | 1                |                      |
| Ad05A19442 | Aradu.A05  | 97035137  | 97035256 | GAGCAGTTTGAGACAAGAAGCA      | TGTGTGGTGTATTCACTTTCCA    | 1                |                      |
| Ad05A19443 | Aradu.A05  | 97036573  | 97036586 | GCACAAGAATAAATTGGACCG       | GGAGGGACCGAGAGAAGAAG      | 1                |                      |

| ID         | Chromosome | SSR_start | SSR_end  | FORWARD PRIMER (5'-3')      | REVERSE PRIMER (5'-3')     | Bands in parents | Polymorphism in RILs |
|------------|------------|-----------|----------|-----------------------------|----------------------------|------------------|----------------------|
| Ad05A19445 | Aradu.A05  | 97039445  | 97039465 | GCCCCATTGAGATTCCTGTA        | GTTGGGCGTATGCTTCTGT        | 1                |                      |
| Ad05A19446 | Aradu.A05  | 97039598  | 97039686 | CCAAAATCAACCAGAAGTCCA       | CGCCAGCTTCTTCTTCTGTG       | 1                |                      |
| Ad05A19447 | Aradu.A05  | 97039929  | 97039961 | CGGCGAAAAAGAAGAAGAAG        | CTACGAAATGGTCCCCAAAA       | 1                |                      |
| Ad05A19449 | Aradu.A05  | 97041807  | 97041833 | TTTGGACCCTACAACGGTTT        | CAATTGCAGAGTACGCCAAA       | 1                |                      |
| Ad05A19450 | Aradu.A05  | 97042330  | 97042368 | TCATGTACTCCTCATCATACTTGTA   | AAGAGAAGGAAGCTATTAGCACTTTT | 1                |                      |
| Ad05A19452 | Aradu.A05  | 97046804  | 97046817 | GGCACAGTGAGGTGTAACGA        | ACCCCATCCCCACTATTCTC       | 1                |                      |
| Ad05A19453 | Aradu.A05  | 97052504  | 97052531 | GCATTCAGAAAGTTCCTCGG        | TGGCTACCTTGGTTGTACCC       | 1                |                      |
| Ad05A19467 | Aradu.A05  | 97103729  | 97103740 | GGACCTTGGGTGTGGTAAGA        | CAAGGCCTCAATACCTCCAA       | 1                |                      |
| Ad05A19468 | Aradu.A05  | 97107555  | 97107569 | GCTTTGCACCTAGAGTCCG         | GTGTAGCACAAACCCCATCC       | 1                |                      |
| Ad05A19470 | Aradu.A05  | 97122459  | 97122486 | GCGAGGCGTTACGAACTTTA        | TGTTTGGGACACTTTTGGGT       | 1                |                      |
| Ad05A19471 | Aradu.A05  | 97123360  | 97123373 | TGCCCTACCACCTTCTCTTG        | ATCCATGTCCCTCCTTTTCC       | 1                |                      |
| Ad05A19473 | Aradu.A05  | 97131688  | 97131699 | ATTCGCCTTGAGAAAAGCAT        | CACAATGCAACAGAACGAAGA      | 2                | Yes                  |
| Ad05A19476 | Aradu.A05  | 97138534  | 97138554 | TTTCTGGGAATTTGTTTGA         | TGCAGCAAATGAATGAAAGG       | 1                |                      |
| Ad05A19478 | Aradu.A05  | 97139267  | 97139287 | CAAGGAGTTGAACAGCGTGA        | CTTCTTCGCCACTTTC AAGG      | 1                |                      |
| Ad05A19479 | Aradu.A05  | 97139441  | 97139455 | ACCCCAATAACCCCAAATA         | TTAGCAGCACCTACAACCCC       | 1                |                      |
| Ad05A19487 | Aradu.A05  | 97154625  | 97154662 | ATGTTGCAAACATGCCAAAA        | AACCACACTCTCTCTCCCA        | 2                | Yes                  |
| Ad05A19488 | Aradu.A05  | 97159873  | 97159899 | GATAAGCGCAACAAAGCGAT        | TTGACAAATGAGAATTGCAACC     | 1                |                      |
| Ad05A19491 | Aradu.A05  | 97171590  | 97171646 | TGTTTGACCAGATTTTACAGAGACA   | CAGGAATATGGAAAAGAATTGG     | 1                |                      |
| Ad05A19492 | Aradu.A05  | 97172013  | 97172026 | GCACATATCTAAATACGAGCACA     | CTTGCGTCTTCTAAAATTTAATC    | 1                |                      |
| Ad05A19495 | Aradu.A05  | 97177948  | 97177961 | GTGTTGGTTGTGGGGA AAAA       | CCCAATTTCTCTTTT CACCGT     | 1                |                      |
| Ad05A19507 | Aradu.A05  | 97198741  | 97198752 | AAATTGGTGCAGGGAATCAA        | TTGACATGGTTCTGCACCTC       | 1                |                      |
| Ad05A19509 | Aradu.A05  | 97202682  | 97202696 | AAGCATAATGGGCAGGTCAC        | CATGTTTGAAGCAA AAGGCA      | 1                |                      |
| Ad05A19512 | Aradu.A05  | 97208620  | 97208640 | TGCAGCACACCACTTACTTGT       | TTGTCCGGACCTAAGTGACTG      | 1                |                      |
| Ad05A19514 | Aradu.A05  | 97214643  | 97214666 | GCATGCTAAGAAAAGGAAGTGA      | GGCTTGATGATAGGTTGGA        | 1                |                      |
| Ad05A19515 | Aradu.A05  | 97221158  | 97221169 | TCACCAAATATGATATAAGAACACAAA | TTTTAGGATCGGACCACGTT       | 1                |                      |
| Ad05A19518 | Aradu.A05  | 97234627  | 97234642 | CTGCAAATAAAGGTCGGCT         | TTGTTTTCAGATGCAGGACG       | 1                |                      |
| Ad05A19519 | Aradu.A05  | 97239299  | 97239316 | ACTTGCCGTTAGTTTGTGG         | GAGGGGAACGAAAGAAAAA        | 1                |                      |
| Ad05A19521 | Aradu.A05  | 97247080  | 97247091 | GCGCGGTGTGACTCTAAATA        | AAATACCACCGTCAAATGC        | 1                |                      |
| Ad05A19523 | Aradu.A05  | 97249075  | 97249086 | GTGCGTGTGCTTGATTGATT        | TCATTGCCATGGAGATCAGA       | 1                |                      |
| Ad05A19525 | Aradu.A05  | 97250068  | 97250088 | TTCGACTTTTGTGCTCAACG        | GCTTTTGGAGTATGTACCGTTTTT   | 1                |                      |
| Ad05A19527 | Aradu.A05  | 97258562  | 97258573 | TTTGTCTGCATCTGTCTGC         | GTCCTAGGAAGCTGTGTCTGC      | 1                |                      |
| Ad05A19529 | Aradu.A05  | 97262191  | 97262214 | ATGTCTGCCAACACACTCA         | GGATAGATGGTGGTGCGTCT       | 1                |                      |
| Ad05A19533 | Aradu.A05  | 97270981  | 97270998 | TGGAAAGCCAACACATTCAA        | AAGCTGCAGCAACAACAATG       | 1                |                      |

| ID         | Chromosome | SSR_start | SSR_end  | FORWARD PRIMER (5'-3')     | REVERSE PRIMER (5'-3')    | Bands in parents | Polymorphism in RILs |
|------------|------------|-----------|----------|----------------------------|---------------------------|------------------|----------------------|
| Ad05A19534 | Aradu.A05  | 97271519  | 97271530 | AGGGGCAATTTTGATTTTGA       | GGATTTGGATGGCAAAAAGA      | 1                |                      |
| Ad05A19540 | Aradu.A05  | 97283118  | 97283243 | AAAGAGCCACACCACAAAC        | GAGCTTCTTGGCTTGGAAATG     | 1                |                      |
| Ad05A19542 | Aradu.A05  | 97291496  | 97291513 | GGGCAATTTAAATGAGAGGC       | CCGCTTGATCGAACATAGAA      | 1                |                      |
| Ad05A19545 | Aradu.A05  | 97312846  | 97312859 | CGATTCGTTTCTCCTGTCGT       | GAGGAATGGGAAGTGACAGC      | 1                |                      |
| Ad05A19548 | Aradu.A05  | 97345800  | 97345815 | TTTGTGACTAAATTTTAAGAGTTTGA | AAAATTTGATGCGTAGATTCTTTT  | 1                |                      |
| Ad05A19551 | Aradu.A05  | 97355811  | 97355834 | AAATGAGTTTGGTTGTGCGC       | ATCTCGATGGACTCACCACC      | 1                |                      |
| Ad05A19554 | Aradu.A05  | 97357836  | 97357850 | GAGTGAGAATGAAAATACAAAGAAAA | GGGATTAAGAAATTTGGTGTGC    | 1                |                      |
| Ad05A19557 | Aradu.A05  | 97358485  | 97358500 | AACGTCTGAATTTTCCGTTG       | GGAGATTTGATGCTGGGAGA      | 1                |                      |
| Ad05A19568 | Aradu.A05  | 97377645  | 97377656 | TCCCTCTCTCCTTCCCTC         | AAGGGGAGAAAGAGCACAA       | 1                |                      |
| Ad05A19569 | Aradu.A05  | 97377849  | 97377860 | TTCTCCCCCTTCTTCTCTC        | TCTCTCTCCCCCTTTCCTTC      | 1                |                      |
| Ad05A19570 | Aradu.A05  | 97378108  | 97378153 | ACAAAAGGGGAAAGAAAGGG       | TTTTCTTTTTCTCCCTCTCCC     | 1                |                      |
| Ad05A19571 | Aradu.A05  | 97378307  | 97378326 | GAGGGGAGGAAAAGGAAAGA       | CCCTCTCCCATCTCTCTTCG      | 1                |                      |
| Ad05A19572 | Aradu.A05  | 97378461  | 97378604 | GAATGGGGAGAGAGAGGGGAG      | AAAACCAGTTTTTATGGTTCAGTTT | 1                |                      |
| Ad05A19573 | Aradu.A05  | 97387616  | 97387635 | AAAGGACTTGGACCCCATCT       | TGTACGTTTCTCAAAAACAGCG    | 1                |                      |
| Ad05A19574 | Aradu.A05  | 97389390  | 97389419 | CCTGCAAAGCTAAGACTGGC       | TTTCTGTTGCAGCGAAGTTG      | 1                |                      |
| Ad05A19577 | Aradu.A05  | 97400014  | 97400028 | TCCTGGTGTATGTTTTTCCTTG     | CCCTATCAATTTCCAACCCA      | 1                |                      |
| Ad05A19583 | Aradu.A05  | 97409349  | 97409360 | TCCTGATTGTGAGGTTGTTCC      | GCGATTTGACAACACTAGGAGTTT  | 1                |                      |
| Ad05A19586 | Aradu.A05  | 97415292  | 97415311 | GCCATTGTCCAAGTCACCTT       | TTTGACCTTTTTAACAAGAGAAAGT | 1                |                      |
| Ad05A19588 | Aradu.A05  | 97417643  | 97417660 | ACAAGCAACGATGCATGAAA       | ATCGACGTGTCCTGTGTCAA      | 1                |                      |
| Ad05A19592 | Aradu.A05  | 97424630  | 97424649 | TTTCGATGTCATTTCTTTTTCTTTC  | TGTTGTCGTCGTTATTATCAGCA   | 1                |                      |
| Ad05A19594 | Aradu.A05  | 97426783  | 97426803 | TTTTCAAAAACCAGTTTTAACTTTC  | AAATTTCTTTCGGTATGCATTTTA  | 1                |                      |
| Ad05A19595 | Aradu.A05  | 97434592  | 97434609 | CTAATCTGCAGCAACCACCA       | CATGAGGTGGTCAGACGAGA      | 1                |                      |
| Ad05A19601 | Aradu.A05  | 97449694  | 97449735 | GCCTTTGTGAATACGAACCA       | GGTGCGAAGACTTAGTACGGA     | 1                |                      |
| Ad05A19606 | Aradu.A05  | 97466616  | 97466633 | TCCTTGGTGAGGTCCCTATAAA     | TCTTTTCCAACACCAATGAATG    | 1                |                      |
| Ad05A19609 | Aradu.A05  | 97470262  | 97470276 | GCTGGTTCTTGGTTCTGCTC       | GCCACTGTTGAAAGGGGTTA      | 1                |                      |
| Ad05A19611 | Aradu.A05  | 97471291  | 97471305 | TACTTTTCTCTCCCCCTCCC       | TCGTCATCTTCATCCACATCA     | 1                |                      |
| Ad05A19612 | Aradu.A05  | 97471415  | 97471514 | GGGTGGTAGTACATGGAAAGATG    | GCTACAGCACCACCAGATGA      | 1                |                      |
| Ad05A19612 | Aradu.A05  | 97471415  | 97471514 | CATCGCAATTGTTACGAGGTT      | GCTCGTTGATAGCAAAAAGTTACAA | 1                |                      |
| Ad05A19613 | Aradu.A05  | 97472148  | 97472171 | CTGTGTTGAATGCTGCTGGT       | AGCAACAACTCCATCACCC       | 1                |                      |
| Ad05A19614 | Aradu.A05  | 97472338  | 97472364 | GGGTGATGGAGTTTGTGCT        | ACCAATTTGAGCACTGCTCC      | 1                |                      |
| Ad05A19615 | Aradu.A05  | 97472860  | 97472874 | TGGGAAAAGGTATCGAGTGG       | TCCGTTGGTTTCGCTTAACCT     | 1                |                      |
| Ad05A19617 | Aradu.A05  | 97473222  | 97473239 | AATAGAGCTGGGCAAGGTCA       | CTGCTGGCTCCTTAGCACTT      | 1                |                      |
| Ad05A19618 | Aradu.A05  | 97474230  | 97474349 | TTTCGGTTTCCCTCAGCTTTC      | GAAGATGAGGGTTGGAAGCA      | 1                |                      |

| ID         | Chromosome | SSR_start | SSR_end  | FORWARD PRIMER (5'-3')      | REVERSE PRIMER (5'-3')      | Bands in parents | Polymorphism in RILs |
|------------|------------|-----------|----------|-----------------------------|-----------------------------|------------------|----------------------|
| Ad05A19619 | Aradu.A05  | 97475048  | 97475062 | CCCGTACTTTCAATCTAATCAATG    | GCGTGTGATGTTGGAGAGAG        | 1                |                      |
| Ad05A19623 | Aradu.A05  | 97478950  | 97478961 | CCGTATATATATGAAGTGCTAATTGTG | TTGTGGTACAAACAAGACTAGAATAAC | 1                |                      |
| Ad05A19627 | Aradu.A05  | 97484447  | 97484461 | CAAAGTTAACAACCAACGCAA       | TCACAACCTTGAGAGCAAGC        | 1                |                      |
| Ad05A19629 | Aradu.A05  | 97490639  | 97490650 | TTTCCAAATCAAAACCCTAATTTT    | ACCCCCTCCCCTCTTATCTT        | 1                |                      |
| Ad05A19635 | Aradu.A05  | 97497075  | 97497110 | TTTACAATTGAATAATCATACTTTTCG | TTGACCTCAATTCACCTTTATTCA    | 1                |                      |
| Ad05A19643 | Aradu.A05  | 97519675  | 97519713 | TCAACGCCAAATTTGATAAAGA      | TCGATCCTTATTATAGACTCAATCTCA | 1                |                      |
| Ad05A19644 | Aradu.A05  | 97520496  | 97520515 | TTTTATGGTATTTTATGTAGAGGGAAG | GATTTCCATGTCGGTATCGC        | 1                |                      |
| Ad05A19648 | Aradu.A05  | 97534976  | 97535025 | CCTCTGCTTCCTCCTCCTCT        | TTTCTCTTCCTCCTCCCAT         | 1                |                      |
| Ad05A19649 | Aradu.A05  | 97535419  | 97535433 | GAGAAGAAGATGATGACGATGATG    | TG TTCATCGTTGATGGTTTGA      | 1                |                      |
| Ad05A19655 | Aradu.A05  | 97547066  | 97547083 | GCCATATTGAATTTTGCATCA       | TTTCTTGGAAGCAATGACAGA       | 1                |                      |
| Ad05A19658 | Aradu.A05  | 97548337  | 97548348 | AATCCCTTTTGGGGCACTAT        | TTTTGAGTTGCGTTTCTCTAACA     | 1                |                      |
| Ad05A19663 | Aradu.A05  | 97550637  | 97550652 | AATGAAATTCTTGTGCTGCCT       | ATATTTGGGGTTACAGGCC         | 1                |                      |
| Ad05A19665 | Aradu.A05  | 97559550  | 97559571 | GATCAATGCATGGAGGACAA        | TCCTCAGCCCAAGCATAACT        | 1                |                      |
| Ad05A19667 | Aradu.A05  | 97561522  | 97561536 | TTTGGGTCCGTCCTGTGTA         | GGATATGTCGTGGAGGGAGA        | 1                |                      |
| Ad05A19668 | Aradu.A05  | 97561761  | 97561774 | TCTCCCTCCACGACATATCC        | GATAACTCAAGGATTTAACCACAAAA  | 1                |                      |
| Ad05A19671 | Aradu.A05  | 97565357  | 97565396 | AGTGGCACTCCCTCCCTTAT        | AGGAAGCGAGTGTGAGGAA         | 1                |                      |
| Ad05A19672 | Aradu.A05  | 97566381  | 97566465 | GTCAGAGTGGGGTTTGGAGA        | ATAGATGCCCTCCGTGTGAC        | 1                |                      |
| Ad05A19673 | Aradu.A05  | 97571178  | 97571198 | TTTTGATTTTATTAGACTTTTGCCA   | TGTCAGAAAATAAACTGGAGACTGA   | 1                |                      |
| Ad05A19674 | Aradu.A05  | 97571558  | 97571608 | AACAGTCCCTCCGTCCAAAAA       | CAAATCAATTTTCAACGCTTTTC     | 1                |                      |
| Ad05A19675 | Aradu.A05  | 97572870  | 97572887 | TGTTTTTGCTCTTGAAAGGA        | AATTGTATGGAGGTGACGGC        | 1                |                      |
| Ad05A19681 | Aradu.A05  | 97588810  | 97588848 | CATTTTTGTACTTGCAGTTGAC      | TATAAGTCGCCAAGTCGGGT        | 1                |                      |
| Ad05A19682 | Aradu.A05  | 97590422  | 97590467 | CCCTCAGATTCCTGCTCAAG        | TTTTCACTTTTCAAATGCATGA      | 1                |                      |
| Ad05A19692 | Aradu.A05  | 97620924  | 97620947 | CGTAAGCAGCGGCTAGATTT        | CACCCAATTACCCTAAGCC         | 1                |                      |
| Ad05A19694 | Aradu.A05  | 97632792  | 97632806 | CAGTCAATAGATGAAGAAGGGGA     | AGCGACTGTTTTCAAGTGCT        | 1                |                      |
| Ad05A19697 | Aradu.A05  | 97643637  | 97643651 | ACAGGCTGCAGAATACACCA        | TTTATAGCAGACGCTCGGGT        | 1                |                      |
| Ad05A19700 | Aradu.A05  | 97647192  | 97647233 | TGGCAATAATTTGGCCTGTT        | ATTTGGTGACGTGCTTCCTT        | 1                |                      |
| Ad05A19706 | Aradu.A05  | 97653892  | 97653906 | GTGATCACTGCAGCCTCTGA        | CGTCCAGGAACAGAGAGGAG        | 1                |                      |
| Ad05A19707 | Aradu.A05  | 97659455  | 97659466 | GAGAGAAGGAGTTGCGGTTG        | CCAATGGTAACGAGCCCTAA        | 1                |                      |
| Ad05A19710 | Aradu.A05  | 97663702  | 97663719 | GGTTTCAACCTCACTGGCAT        | TCCAGCACTCAAGACCACAC        | 2                | Yes                  |
| Ad05A19715 | Aradu.A05  | 97674888  | 97674908 | TTTTTCAAACATTGATCAGGA       | AAAGCCACATTTTACGAGCA        | 1                |                      |
| Ad05A19717 | Aradu.A05  | 97678323  | 97678342 | AAGTTTCATTTTATGGATGTGTGG    | GCCACAAATTGGAGGAAGAC        | 1                |                      |
| Ad05A19722 | Aradu.A05  | 97688451  | 97688465 | TTACAGATTTCAACAAAAATTTCA    | ACCGCATCAACCCACCAC          | 1                |                      |
| Ad05A19725 | Aradu.A05  | 97693189  | 97693203 | GAGCATCTTCATGCTTAGTTTTAATTC | TGGTGACAACAACGACAACA        | 1                |                      |



| ID         | Chromosome | SSR_start | SSR_end  | FORWARD PRIMER (5'-3')     | REVERSE PRIMER (5'-3')     | Bands in parents | Polymorphism in RILs |
|------------|------------|-----------|----------|----------------------------|----------------------------|------------------|----------------------|
| Ad05A19729 | Aradu.A05  | 97698238  | 97698310 | CCTTTAATTCTTCTCAAATCTCTCTT | GGATTTTCTTGAATTTTGACTCTAAG | 1                |                      |
| Ad05A19730 | Aradu.A05  | 97698494  | 97698535 | TTGGTTCAATTTCAAACCTTCACA   | TGTGGAGTAGCCTGTGTTATGC     | 1                |                      |
| Ad05A19731 | Aradu.A05  | 97699933  | 97699948 | ATCGATACGCCATGTTCTCC       | GCCATGAACCCCTACTTCTCT      | 1                |                      |
| Ad05A19737 | Aradu.A05  | 97720806  | 97720817 | GATGACAAATGCTTAGGCGA       | GCAACATGAAAGAGAGGAAGAGA    | 1                |                      |
| Ad05A19738 | Aradu.A05  | 97725185  | 97725196 | TGACGATGGAGAGACATGGA       | AATGTTGAGCCGAGCTGAGT       | 1                |                      |
| Ad05A19739 | Aradu.A05  | 97731096  | 97731125 | ACCTACCGTTACGTCGTTCCG      | TTGGTTTTCTCGGGTAATGC       | 1                |                      |
| Ad05A19741 | Aradu.A05  | 97733828  | 97733841 | TGTCCCATCTTTTTCCATCA       | ATAAAAGCCCAGGAGGAGGA       | 1                |                      |
| Ad05A19743 | Aradu.A05  | 97738068  | 97738083 | TTGCGAAGTTGGGATTTTTTC      | ACCATCACCAACGAATAGGC       | 1                |                      |
| Ad05A19744 | Aradu.A05  | 97738445  | 97738464 | TGCTCTGGATCAAAGGTTTTTC     | TGGATTGCAACTACCTACCCA      | 1                |                      |
| Ad05A19747 | Aradu.A05  | 97755051  | 97755116 | GTGTCACCTCACTCACCCCT       | GCAACAGAAGAGGAAGCAGG       | 1                |                      |
| Ad05A19748 | Aradu.A05  | 97757731  | 97757758 | TGAAATCACTGTCCTTCCCC       | AGCGATGGCAAGAGAGAAAG       | 1                |                      |
| Ad05A19752 | Aradu.A05  | 97764809  | 97764823 | TGAAGACGACGAAGACGATG       | TCTTTTGCACGCCTCTTTCT       | 1                |                      |
| Ad05A19753 | Aradu.A05  | 97765965  | 97765976 | TCCATCACACCTTCAGAAGAGA     | GCTAGACTGCTGGAGGATGC       | 1                |                      |
| Ad05A19755 | Aradu.A05  | 97766743  | 97766763 | TGGTTCTTTGGTTTTGGTGA       | CACTCCATCACCATCTGCAC       | 1                |                      |
| Ad05A19756 | Aradu.A05  | 97766937  | 97766954 | GTGCAGATGGTGATGGAGTG       | CTGAGAGATATCGTCGGGCT       | 1                |                      |
| Ad05A19758 | Aradu.A05  | 97785818  | 97785832 | GCATAAGTGAGACAAGCAGGG      | GCTGTGAAGAATCATTGGCA       | 1                |                      |
| Ad05A19760 | Aradu.A05  | 97787299  | 97787310 | TTCATTAATCTCCCCCTCCC       | TCTCCCCTCTCTAACGGA         | 1                |                      |
| Ad05A19762 | Aradu.A05  | 97789449  | 97789466 | CGTAAATTTTCGTCGCACTCA      | CCCAAACCTTTAGCTTCTTGTT     | 1                |                      |
| Ad05A19764 | Aradu.A05  | 97790160  | 97790189 | GGGTGAGCAAAAATTGATTGA      | TGCAACTGAATTTCCACCTTT      | 1                |                      |
| Ad05A19765 | Aradu.A05  | 97794933  | 97794944 | TTTCTTTGTTTTTCGTGTGAGTAAA  | TGGAAAGAGAGGGTAATAATCAGA   | 1                |                      |
| Ad05A19766 | Aradu.A05  | 97796055  | 97796072 | GCTACCAACTAACGCCACCA       | AATCAAAACTCCACAACCGC       | 1                |                      |
| Ad05A19769 | Aradu.A05  | 97800229  | 97800258 | GCGGAAGATAATAGTCTTTTCAGGT  | TGTTAGGAGAGACTAACACAATTGAA | 1                |                      |
| Ad05A19770 | Aradu.A05  | 97800566  | 97800577 | CAAATGGGATAGCACACCCT       | AAAGAATTCACCAAACGGTCA      | 1                |                      |
| Ad05A19772 | Aradu.A05  | 97801256  | 97801279 | CTGCAATGTCTGATGGCCTA       | TGTCCTGTACCTAATGCCCA       | 1                |                      |
| Ad05A19774 | Aradu.A05  | 97805071  | 97805088 | GAAGAAATTCTCGCTGTCCG       | ATGCTGAAAATGCGAGGAAC       | 1                |                      |
| Ad05A19775 | Aradu.A05  | 97805463  | 97805477 | TTGAGGCTGAAGGAGGTCAT       | CAGCATCCAAAAGCAATTCA       | 1                |                      |
| Ad05A19778 | Aradu.A05  | 97811727  | 97811741 | GCTGGACGCTAAGAATTTGC       | TGAACAGAAGCAAACGATGC       | 1                |                      |
| Ad05A19780 | Aradu.A05  | 97817976  | 97817991 | TTCTTCTCGTCAAGCACT         | CCAGGCCAGGTCATTAATA        | 1                |                      |
| Ad05A19782 | Aradu.A05  | 97821926  | 97821937 | TCAACGCATTGAACAGGAAG       | AGTGGAGCTTCAAATGGTTCG      | 1                |                      |
| Ad05A19783 | Aradu.A05  | 97824805  | 97824816 | ACAGGTTGAACCGACTGACC       | CTGTTGCTGCAGTGTGATTG       | 1                |                      |
| Ad05A19786 | Aradu.A05  | 97831713  | 97831728 | TGAACCGGTAGGTCCAATTC       | TGAATTTTCATAATGTGATTCCAC   | 1                |                      |
| Ad05A19787 | Aradu.A05  | 97832880  | 97832894 | GTGTTTCCAATGTGGGCTTT       | CCTCCCCTTTTCGTTTCTTTC      | 1                |                      |
| Ad05A19794 | Aradu.A05  | 97861144  | 97861164 | GCTCCTTCGTTTTCTCCTCCTC     | TCAAGTTGATTGGATTCCGA       | 1                |                      |

| ID         | Chromosome | SSR_start | SSR_end  | FORWARD PRIMER (5'-3')    | REVERSE PRIMER (5'-3')    | Bands in parents | Polymorphism in RILs |
|------------|------------|-----------|----------|---------------------------|---------------------------|------------------|----------------------|
| Ad05A19795 | Aradu.A05  | 97863035  | 97863049 | TGAAGAAGAAGAAGCAGCAAAA    | TTGGGTGTAATATGAAGACATTTGA | 1                |                      |
| Ad05A19798 | Aradu.A05  | 97873466  | 97873483 | TGCATTATTGTTTGCATGGAT     | ATTTCTTGACGGCATCTCGT      | 1                |                      |
| Ad05A19805 | Aradu.A05  | 97901270  | 97901281 | AAATAAGGCTAGGCACTGCG      | CAGCCCATCTCACTCTCTCC      | 1                |                      |
| Ad05A19806 | Aradu.A05  | 97901397  | 97901410 | GGAGAGAGTGAGATGGGCTG      | ACCCCCAACCTTCATCTTCT      | 1                |                      |
| Ad05A19809 | Aradu.A05  | 97913974  | 97913994 | AATTTCTGTGCTGCCTGATTC     | TCTGAAACAAACACAACCCG      | 1                |                      |
| Ad05A19812 | Aradu.A05  | 97918635  | 97918698 | TCAGCCTGACCAAACATCAA      | TGTTTCAGGCAGTCAATGGAT     | 1                |                      |
| Ad05A19823 | Aradu.A05  | 97947598  | 97947613 | TGGAAGATGAAAATATCGGAAGA   | TGCTTATGGTGGTTATAGTGGC    | 2                | Yes                  |
| Ad05A19826 | Aradu.A05  | 97958771  | 97958794 | TTGGTTGAGAGGGAGTACCG      | CAGGGAACACCGACTTTTGT      | 1                |                      |
| Ad05A19828 | Aradu.A05  | 97967790  | 97967804 | CCCAAGGATTTTAAAAGCGAA     | CATTGTCCACATGCACAAAAC     | 1                |                      |
| Ad05A19829 | Aradu.A05  | 97968043  | 97968057 | TTTGTGCATGTGGACAATGA      | AACAGTCTTCGTAAAAACAAAGT   | 1                |                      |
| Ad05A19834 | Aradu.A05  | 97979665  | 97979680 | TGCAGAGGAATCAGAAACTGAA    | TTCTTGCTGCACCAATTCAA      | 1                |                      |
| Ad05A19835 | Aradu.A05  | 97979924  | 97979941 | GGTGCAGCAAGAAAGCAAAT      | TTCATGTTGCAGTTTAGGTTGG    | 1                |                      |
| Ad05A19836 | Aradu.A05  | 97980687  | 97980700 | TGAGGATACGGAACCTGGAC      | TGGTTCGGTTCTAATAATTGGG    | 1                |                      |
| Ad05A19842 | Aradu.A05  | 97986767  | 97986781 | TTTCTCCTCCTCATCTTCTGC     | CCACATATTGTTACGGCAGC      | 1                |                      |
| Ad05A19843 | Aradu.A05  | 97987498  | 97987512 | TTTCTGACCGCATCAAATCA      | GGCCAAAACCACCACTTTTT      | 1                |                      |
| Ad05A19846 | Aradu.A05  | 97990662  | 97990688 | TGTGCGTAAACTCAAGTTGCT     | GTGCCAAGTGACGAGACAAA      | 1                |                      |
| Ad05A19848 | Aradu.A05  | 98002545  | 98002556 | AAAAACAAATGGCCGAAGG       | ATTCACGGTTCTGCTCACC       | 1                |                      |
| Ad05A19849 | Aradu.A05  | 98004252  | 98004263 | CCCTCTCTCTCCACACACA       | AAGACAAAGAGAGGGGAGGG      | 1                |                      |
| Ad05A19850 | Aradu.A05  | 98004387  | 98004402 | CCCTCTCTCTCCACACACA       | AAGACAAAGAGAGGGGAGGG      | 1                |                      |
| Ad05A19853 | Aradu.A05  | 98007236  | 98007271 | ACGATCATGACGTGCTGAGA      | AAACACATCACACCTGCCAA      | 1                |                      |
| Ad05A19857 | Aradu.A05  | 98015577  | 98015588 | GCTGTGCTATTCTTGTCTTCC     | TTTGTTCAAAAGGATTTGATTCAT  | 1                |                      |
| Ad05A19865 | Aradu.A05  | 98039154  | 98039169 | TGTTGTCTGCTGTTGAAACAAA    | TCGGACTACATACAACAGTGGA    | 1                |                      |
| Ad05A19866 | Aradu.A05  | 98039313  | 98039327 | TCCACTGTTGTATGTAGTCCGA    | GAAAACCAAATCAGCAAAACA     | 1                |                      |
| Ad05A19868 | Aradu.A05  | 98046935  | 98046949 | TGCCATACAATTGAGGACCA      | TTTCTCCTGGACGGAATCAC      | 1                |                      |
| Ad05A19874 | Aradu.A05  | 98066856  | 98066875 | CGAAAATTAAGACAAAATCAAATG  | AAATAACAAAACAAAACGTTCA    | 1                |                      |
| Ad05A19876 | Aradu.A05  | 98074847  | 98074861 | CAAAGGCAGTTGAAGGAAGC      | CAACATCACAGCAACGAACC      | 1                |                      |
| Ad05A19878 | Aradu.A05  | 98079603  | 98079614 | GCGAAGCCAATTTCTCTCAC      | TGGGGATGTATTCTTGACC       | 1                |                      |
| Ad05A19880 | Aradu.A05  | 98092581  | 98092592 | ATTCTGCCACCATCCTCATC      | GCAACGACGGAGTGAGAGAC      | 1                |                      |
| Ad05A19886 | Aradu.A05  | 98112620  | 98112633 | CTTTGGACGCATAGGTGGTT      | TGCCGAAATTATCGTTGGAT      | 1                |                      |
| Ad05A19889 | Aradu.A05  | 98114017  | 98114158 | TGTTGTTGAAATTTGTTGTGGA    | CTGTGTTTTCTCCCACCACC      | 1                |                      |
| Ad05A19891 | Aradu.A05  | 98116221  | 98116242 | CAAAAATCAATAACAAGATTAGGGA | TCCCATCTGTAAACACCCCT      | 1                |                      |
| Ad05A19893 | Aradu.A05  | 98123083  | 98123096 | TGAAGCGTAAATACCTCCACA     | CTTCGGCGATGATGACAAG       | 1                |                      |
| Ad05A19899 | Aradu.A05  | 98169169  | 98169188 | CTGCGCACTTATATGATTGGA     | TCAGATATATCCACAAAACACAAAA | 1                |                      |

| ID         | Chromosome | SSR_start | SSR_end  | FORWARD PRIMER (5'-3')      | REVERSE PRIMER (5'-3')   | Bands in parents | Polymorphism in RILs |
|------------|------------|-----------|----------|-----------------------------|--------------------------|------------------|----------------------|
| Ad05A19900 | Aradu.A05  | 98169806  | 98169817 | TTGAGCCAACCTTCCTCTTGA       | G TTCAGAAGCGAAAAAGGGA    | 1                |                      |
| Ad05A19902 | Aradu.A05  | 98181339  | 98181386 | ATCCGTCCATGCGAGTAAAC        | TGTCACCGTGTTTCGTTGAT     | 1                |                      |
| Ad05A19903 | Aradu.A05  | 98181533  | 98181544 | TCAACGAAACACGGTGACAT        | CAAAAGAAAGGCCTGTTTGC     | 1                |                      |
| Ad05A19905 | Aradu.A05  | 98194837  | 98194856 | CGAAAAGCTTGTGAAATTCTTG      | AGAGTCAACGTTTGGTGCCT     | 1                |                      |
| Ad05A19907 | Aradu.A05  | 98201016  | 98201039 | CGAATTTTGTGTAGGTATCCGC      | AGATCGGATCGGATATTGG      | 1                |                      |
| Ad05A19911 | Aradu.A05  | 98204337  | 98204399 | TACCGTGCTTAAATCCGTCC        | AGAGCCACGTTCTCTAACG      | 1                |                      |
| Ad05A19912 | Aradu.A05  | 98205970  | 98206095 | CAGCCAAACATTGTGATATGC       | GGATATTGCCTTGTTATGAACG   | 2                | Yes                  |
| Ad05A19915 | Aradu.A05  | 98209228  | 98209242 | CAAGACTCATGCATGTCACAAA      | GGCTTATTCCGATGTACGTG     | 1                |                      |
| Ad05A19921 | Aradu.A05  | 98228568  | 98228625 | TCTTTCTCCTCCTCGTCTTCTG      | CCACATACTGTTACGGCACG     | 1                |                      |
| Ad05A19923 | Aradu.A05  | 98236214  | 98236225 | GAAATGGATCTTGGTTCCGA        | TTGTTCAAACCTTACCGCC      | 1                |                      |
| Ad05A19927 | Aradu.A05  | 98245235  | 98245252 | GCCATTTGTGGGTTGTATCC        | CGTGCTTTGGTGTGTGTCT      | 1                |                      |
| Ad05A19928 | Aradu.A05  | 98247980  | 98247991 | CCAGGCCTTGTACACAACATA       | ACCCTCCTGCTCCCAAAA       | 1                |                      |
| Ad05A19935 | Aradu.A05  | 98260607  | 98260621 | TCCTCTTCAAGTAATTTTGCAGC     | TCCTTCTTCTCATCTTCTGTTGC  | 1                |                      |
| Ad05A19936 | Aradu.A05  | 98261067  | 98261081 | TGAATGAATGTAGGTTTCATCCTCT   | CCTCCTCTTCTCCTCCTCTTC    | 1                |                      |
| Ad05A19937 | Aradu.A05  | 98261935  | 98261950 | TGTTTTCACTTCGAGCAACAAA      | CGTAGCATAGTCGATCTTTAACC  | 1                |                      |
| Ad05A19938 | Aradu.A05  | 98266442  | 98266453 | TTGCTTCGTGGAAAGTTTGA        | TCTGCCTAAAAGGCTAGCTCA    | 1                |                      |
| Ad05A19940 | Aradu.A05  | 98267473  | 98267493 | AAGCTTCACATTTTGTATTGGATAAA  | GCAACCATCACTTGCGTATG     | 1                |                      |
| Ad05A19941 | Aradu.A05  | 98268737  | 98268751 | GCAACCTAGTGGAAATCAATGG      | GATGGACAAGGGGTGAAAGA     | 1                |                      |
| Ad05A19944 | Aradu.A05  | 98282660  | 98282679 | GCGATGATATTTCCAGCGAT        | CTCACACCACATTACCGTCG     | 1                |                      |
| Ad05A19949 | Aradu.A05  | 98289134  | 98289148 | TTTTAGAAGAATTATGGGACATTATGA | TTCTTGAGAAAGTTCAAGACTCCA | 1                |                      |
| Ad05A19951 | Aradu.A05  | 98298628  | 98298642 | GTCGTGGTGCACAAAAGTTG        | TCGACCTTCCATAGTGGGAC     | 1                |                      |
| Ad05A19953 | Aradu.A05  | 98307262  | 98307369 | CACCACATAACAACCTTTGGG       | TCACGTCAATCCTTCTCAGTG    | 1                |                      |
| Ad05A19958 | Aradu.A05  | 98328316  | 98328335 | TTTTGAAACCTTAATTGGCTCC      | GTCGAGGGCACAGATTAGGA     | 1                |                      |
| Ad05A19960 | Aradu.A05  | 98340833  | 98340848 | CGTCGAAAATATTCGCCAGT        | GAGGTATAATGGCGGCAGAA     | 1                |                      |
| Ad05A19962 | Aradu.A05  | 98351058  | 98351072 | GAATTAACCGGTTTGCCTCA        | CCTTTGGTTTCGTCATTCTCC    | 1                |                      |
| Ad05A19973 | Aradu.A05  | 98383225  | 98383249 | CGCATTCTTTTCTTTCTCCTCG      | TCTCTTTCTTGTTCACCTTCTCA  | 1                |                      |
| Ad05A19974 | Aradu.A05  | 98383434  | 98383451 | TGAGAAGGTGAAACAAGAAAGAGA    | CCTCGTTGTTATCGTTGTCTG    | 1                |                      |
| Ad05A19975 | Aradu.A05  | 98383651  | 98383668 | CCATGACACCGAAAGTTTCTT       | CGGGAACGACTTAGGGTACA     | 1                |                      |
| Ad05A19976 | Aradu.A05  | 98385913  | 98385936 | TGCTCCTTTAAAGAGGTCTTGTG     | GTCGTCATCGTCGTTGTGTCAT   | 1                |                      |
| Ad05A19979 | Aradu.A05  | 98392557  | 98392568 | GGAATTCGTGCCGATTAATA        | CCCCGAAAAGAATATACGTGA    | 1                |                      |
| Ad05A19981 | Aradu.A05  | 98397882  | 98397896 | ACGTGTGCGCGTCTATGTTA        | ACTTGCCATGAAATCACCAA     | 1                |                      |
| Ad05A19983 | Aradu.A05  | 98400371  | 98400385 | CGTAAGATGATGATAATAATGCCAA   | TTCATTAAGCTCCTCTCAATTTTT | 1                |                      |
| Ad05A19984 | Aradu.A05  | 98401133  | 98401150 | CAGAAACCAGCGAGGTCATT        | GCATTTAGAACGCGGAAAAG     | 1                |                      |

| ID         | Chromosome | SSR_start | SSR_end  | FORWARD PRIMER (5'-3')      | REVERSE PRIMER (5'-3')      | Bands in parents | Polymorphism in RILs |
|------------|------------|-----------|----------|-----------------------------|-----------------------------|------------------|----------------------|
| Ad05A19985 | Aradu.A05  | 98401480  | 98401537 | CAAGAGAGTATTACTGCCGGTG      | AGGTTTTGTGGAGGCAAATG        | 1                |                      |
| Ad05A19986 | Aradu.A05  | 98401858  | 98401877 | CATTTGCCTCCACAAAACCT        | GCTGACACCAGAAACCCATT        | 1                |                      |
| Ad05A19989 | Aradu.A05  | 98405313  | 98405348 | CTTCCTGATAGATGCACCCC        | TCCCTCAACTAACCCCTCT         | 1                |                      |
| Ad05A19991 | Aradu.A05  | 98405867  | 98405884 | AAGAGGGAGTCAAGAACGCA        | ATGCCCCGAACCATACAACAT       | 1                |                      |
| Ad05A19992 | Aradu.A05  | 98407131  | 98407255 | TTTGCCAAAAAGAAAGAATTG       | TCCTTGCTAAAGCTATAAACCAAAA   | 1                |                      |
| Ad05A19996 | Aradu.A05  | 98419003  | 98419032 | CAAGGAATTGCAGGGAGGTA        | AGGATGGGATTTCCAGTTCTC       | 1                |                      |
| Ad05A19999 | Aradu.A05  | 98425589  | 98425606 | CACCAACATTGGTCATTTGC        | TCTCACACCAATTTACATCA        | 2                | Yes                  |
| Ad05A20000 | Aradu.A05  | 98425763  | 98425782 | CAAAATCACATTTCCACACCA       | CTAAATAGTATTATTGATTGGGGAGAA | 1                |                      |
| Ad05A20001 | Aradu.A05  | 98428053  | 98428152 | TTTGGTCTAATATAAAAATGTGATTTG | AATTGACAATAGGCATCGGC        | 1                |                      |
| Ad05A20002 | Aradu.A05  | 98429522  | 98429539 | CATCCATCCAGAGAGCCTTC        | AATTTTTAATTGCCGCAAGC        | 1                |                      |
| Ad05A20004 | Aradu.A05  | 98456145  | 98456158 | TCAAAAGTTCACAAATTAATGGG     | GCAGAGTGGAGGAATCAAGG        | 1                |                      |
| Ad05A20009 | Aradu.A05  | 98468858  | 98468875 | AAAGAGGAACAACAGCGAGC        | CGTACTGGGTTTGTGTCGTCG       | 1                |                      |
| Ad05A20010 | Aradu.A05  | 98470364  | 98470383 | ATGGGGTTGTGTGTCCAAGT        | GGATCTTGGATGTGCCCTTA        | 1                |                      |
| Ad05A20012 | Aradu.A05  | 98478371  | 98478386 | GAGAGTCTGAGAGGGCATCG        | TTATCCGTCCAAACCCAAAC        | 2                | Yes                  |
| Ad05A20016 | Aradu.A05  | 98498843  | 98498854 | CGGAAAAGCACACCAAACTT        | TTTTTCGAAATCTCCTCCCC        | 1                |                      |
| Ad05A20018 | Aradu.A05  | 98526409  | 98526511 | GGAGGAGCAGCAGAAGAAGA        | GTTGCAGCACAACCTCCTCA        | 1                |                      |
| Ad05A20022 | Aradu.A05  | 98541014  | 98541049 | CCATTCAGAACCAAAACCAA        | GGCTTACAGAGGAACCAACC        | 1                |                      |
| Ad05A20026 | Aradu.A05  | 98563783  | 98563794 | TTTGAAGACACTCACCATAGCC      | TCAGAGAACTATTAGACACAAACACTT | 1                |                      |
| Ad05A20027 | Aradu.A05  | 98565420  | 98565434 | AAGTGGGCCACCAGAGACTA        | TGTCCTAACAATTTCCGGGT        | 1                |                      |
| Ad05A20028 | Aradu.A05  | 98567071  | 98567088 | GGTTCTTGACATTGAAGAGCTG      | TTTCATTTTTGATATCTTGCCAAA    | 1                |                      |
| Ad05A20030 | Aradu.A05  | 98568260  | 98568279 | GAAAGCCAAGCTAGCCACTG        | AGCACGCGACAGTGTAAGA         | 1                |                      |
| Ad05A20039 | Aradu.A05  | 98590823  | 98590852 | TCTCGCTGTCACAACTCACC        | CAACGTAGGGAGGAGAGCAG        | 1                |                      |
| Ad05A20042 | Aradu.A05  | 98597044  | 98597058 | TTCATCCCAAATTATCAAATGTTTA   | TGCATGTAACAATGTTGAAATAAAA   | 1                |                      |
| Ad05A20043 | Aradu.A05  | 98599066  | 98599092 | TCATGAGAAGGTAAAACAAGAAGAAA  | TCAAAACAATCACAGGCCAA        | 1                |                      |
| Ad05A20046 | Aradu.A05  | 98606143  | 98606156 | TGATAGAACTGCCGATCCAG        | TCGGACGGTTCGATTTTTAT        | 2                | Yes                  |
| Ad05A20052 | Aradu.A05  | 98620364  | 98620378 | AAAATTCTTGCCGAACCTCAA       | CGGTCAATCTAACGACTCCTTT      | 1                |                      |
| Ad05A20058 | Aradu.A05  | 98634223  | 98634236 | ATCAAGCTCCAGATGCAACC        | TTGGGGTTGTCTGTACGTA         | 1                |                      |
| Ad05A20059 | Aradu.A05  | 98635745  | 98635764 | CCTCAGGTGAGTGAGGATCG        | CATCCGAAAAGACAAAGCAT        | 1                |                      |
| Ad05A20062 | Aradu.A05  | 98641388  | 98641399 | CATGAACTCAGTAGAGCCCC        | CTCAGCCCAAACACTCATCA        | 1                |                      |
| Ad05A20066 | Aradu.A05  | 98651978  | 98651995 | GCCTCTTTCCTATCTTACCC        | TGCAAGTGAATTGTTGAATGC       | 1                |                      |
| Ad05A20067 | Aradu.A05  | 98671006  | 98671047 | CTGAGTCAAGCCTTAGCGTG        | CCAACCTAAGAACTTTGGATCTTG    | 1                |                      |
| Ad05A20070 | Aradu.A05  | 98686262  | 98686279 | ACGTGGTGGTTATGGAGGAG        | CACAGCCGCTTGATACTGAA        | 1                |                      |
| Ad05A20071 | Aradu.A05  | 98688603  | 98688614 | CCTCCACCCTGGGTATTTTT        | CATATCCACTGGCCAACCT         | 1                |                      |

| ID         | Chromosome | SSR_start | SSR_end  | FORWARD PRIMER (5'-3')      | REVERSE PRIMER (5'-3')    | Bands in parents | Polymorphism in RILs |
|------------|------------|-----------|----------|-----------------------------|---------------------------|------------------|----------------------|
| Ad05A20075 | Aradu.A05  | 98705743  | 98705757 | GCAAGTGGTGCAGCATAAAA        | GATTTTTGGGTGACGGAAGA      | 1                |                      |
| Ad05A20076 | Aradu.A05  | 98709860  | 98709920 | TTTTTGCCTCCTCGTTTGA         | TTGTCCCTCTAAGGTAACGTTCT   | 1                |                      |
| Ad05A20080 | Aradu.A05  | 98722709  | 98722722 | ACAACCGAGTGGAGTTGGAG        | AGGGGGAAATCAGTTTTTGG      | 1                |                      |
| Ad05A20083 | Aradu.A05  | 98737532  | 98737553 | AGTTGATTTATGAATTCACCTTTTAGT | CAAAATCTCAAACCTCCAGATTCAA | 1                |                      |
| Ad05A20084 | Aradu.A05  | 98738228  | 98738251 | GGTGCATGGTAAAATGGCTT        | CGACCCTATGTGTACGATGG      | 2                | Yes                  |
| Ad05A20089 | Aradu.A05  | 98795119  | 98795138 | GGATGGTCCGAGTTGATTGT        | CGAAAGGAGAGAAATACAAGAGC   | 1                |                      |
| Ad05A20098 | Aradu.A05  | 98836382  | 98836488 | TAGGGCTGGGAAATGAATGA        | TGCTTTAACTACCCAAAAACTGC   | 1                |                      |
| Ad05A20099 | Aradu.A05  | 98849715  | 98849730 | GACACTTGTGGCAGCTTGAA        | GAGGGAGAGGAAAATCGGAG      | 1                |                      |
| Ad05A20101 | Aradu.A05  | 98860700  | 98860711 | CCAATTCATGCTCAAACCAA        | GTGACATTCCGGGTTTTACG      | 1                |                      |
| Ad05A20102 | Aradu.A05  | 98864701  | 98864712 | AAGCCCTTTCCAAGCTTTTC        | TGTTTCGAAATCTCAGCCCTT     | 1                |                      |
| Ad05A20103 | Aradu.A05  | 98868900  | 98868914 | GCACCTGTTTCTGCCCTCTC        | TGCACCTAGAGGTCCGTCTT      | 1                |                      |
| Ad05A20106 | Aradu.A05  | 98896363  | 98896374 | CGAAGTTGGTTATTTCGGGA        | TAAAGCTGAGGTGGCAAGGT      | 1                |                      |
| Ad05A20107 | Aradu.A05  | 98902122  | 98902136 | TTTTCGTGACCCATGCATTA        | GGCCGAATTACTCTTCTCCC      | 1                |                      |
| Ad05A20109 | Aradu.A05  | 98910711  | 98910728 | CAGGGAAAAAGGCACTCTTG        | CTTTGTGAAGTTGCCAAGCA      | 1                |                      |
| Ad05A20110 | Aradu.A05  | 98913829  | 98913846 | CATCAACCTCCTCTTTCCCA        | CTCCCAAGACTCAGAGGTGG      | 1                |                      |
| Ad05A20112 | Aradu.A05  | 98930390  | 98930436 | GGTTTCGCGCATTTAACATT        | CAACCATGTCTTTACATTGCCA    | 2                | Yes                  |
| Ad05A20113 | Aradu.A05  | 98958538  | 98958562 | GTCCTGGAGGGTGGAGGTA         | CCCAACAGAGGAACATGACC      | 1                |                      |
| Ad05A20116 | Aradu.A05  | 98993934  | 98993949 | AGGAGCCTTGAAAATGGGT         | CTCCGGTTCTCATCCCATAC      | 1                |                      |
| Ad05A20117 | Aradu.A05  | 98995416  | 98995445 | GATTGCAAGAAATCGAAGCC        | AGCATGAAAGTAAAAGGCGG      | 1                |                      |
| Ad05A20118 | Aradu.A05  | 98995582  | 98995638 | CCGCCTTTTACTTTTCATGCT       | GGTGGATAGAATGTAGCGATCC    | 1                |                      |
| Ad05A20119 | Aradu.A05  | 98997157  | 98997168 | GGATCCACGAGACGACATT         | GCGTGAGGTTCTGTGTGGTA      | 1                |                      |
| Ad05A20120 | Aradu.A05  | 98999109  | 98999214 | TGGTGGGGTTTAGGTTCCCTT       | AGCATGAAAGTAAAAGGCGG      | 1                |                      |
| Ad05A20121 | Aradu.A05  | 98999351  | 98999386 | CCGCCTTTTACTTTTCATGCT       | AGTGCAACTTGTAGCGACCC      | 1                |                      |
| Ad05A20122 | Aradu.A05  | 99001485  | 99001496 | TATGGTTTAGGCTTCACGCA        | CATCATGAAATCCTTCAACCC     | 1                |                      |
| Ad05A20123 | Aradu.A05  | 99013978  | 99013992 | CTACTACGCGAGTGATGCCA        | AAACATCCGCAAACGAAAG       | 1                |                      |
| Ad05A20125 | Aradu.A05  | 99015905  | 99015922 | GAGTGAGAAATGGGCAAAGG        | TCCAGCAACATAAATTCACAGC    | 1                |                      |
| Ad05A20126 | Aradu.A05  | 99017361  | 99017375 | TTGAAACTTATTGAAAACGTTAAGGA  | TCACATGCAATTGCCTTCAT      | 1                |                      |
| Ad05A20130 | Aradu.A05  | 99023872  | 99023911 | TGAAGCACGACGATAGCAAC        | ATCACGGCTACCATGACCTC      | 1                |                      |
| Ad05A20133 | Aradu.A05  | 99031843  | 99031854 | ACTCCGGAACGAGTTTTCTT        | CGGTTTCGAATTAGTGGGAGA     | 1                |                      |
| Ad05A20134 | Aradu.A05  | 99035918  | 99035935 | TACAGTGGAGAGGGAGTGGG        | GTCTGGGGTCGAAATCAAAA      | 1                |                      |
| Ad05A20135 | Aradu.A05  | 99037422  | 99037436 | GCTAATGTGGCATCCTCTCC        | ACTGGTCGACTTCCACAACC      | 1                |                      |
| Ad05A20137 | Aradu.A05  | 99041013  | 99041105 | GGAATGTTTTGGTTTGCTGC        | TATTGACAAGCACAACCCCC      | 1                |                      |
| Ad05A20139 | Aradu.A05  | 99049493  | 99049507 | GCTAATGTGGCATACTCTCCA       | ACTGGTCGACTTCCACAACC      | 1                |                      |

| ID         | Chromosome | SSR_start | SSR_end  | FORWARD PRIMER (5'-3')  | REVERSE PRIMER (5'-3')    | Bands in parents | Polymorphism in RILs |
|------------|------------|-----------|----------|-------------------------|---------------------------|------------------|----------------------|
| Ad05A20141 | Aradu.A05  | 99053011  | 99053103 | TTGTTTGGTGCCCTTGATAA    | TCCAATACACCAGCAAACCA      | 1                |                      |
| Ad05A20143 | Aradu.A05  | 99103095  | 99103109 | TTGATGACGGTGGAAAGATG    | TCCGTCAACTTTTCAATCCA      | 1                |                      |
| Ad05A20144 | Aradu.A05  | 99107990  | 99108001 | AGATGCTCACGCATCAAGAA    | AGGAGCCTTGAAGAATGGGT      | 1                |                      |
| Ad05A20147 | Aradu.A05  | 99115381  | 99115398 | GGATCATTCCACATAACCG     | CTTGATCATTCTGGGGCTGT      | 1                |                      |
| Ad05A20149 | Aradu.A05  | 99131221  | 99131235 | CAGCCTTCCCCACATACCT     | TGGCTTTTCTTCCCCCTAAT      | 1                |                      |
| Ad05A20150 | Aradu.A05  | 99131421  | 99131442 | CACGTTGGTGTGGTGAAG      | GTCATTTGCATCACCTCCT       | 1                |                      |
| Ad05A20155 | Aradu.A05  | 99154376  | 99154393 | AAATGGAGTTCTAATCCGCAA   | AATGGAAATTCACCGCAAAA      | 1                |                      |
| Ad05A20156 | Aradu.A05  | 99154883  | 99154921 | GCAAGGAGCTAGGTCAACGA    | AAAATTTACGCATGAATCAATAAAA | 1                |                      |
| Ad05A20166 | Aradu.A05  | 99188061  | 99188080 | TCCACCCTCATTTGAGATCC    | TGAAGTTCAGATTTGCGACG      | 1                |                      |
| Ad05A20169 | Aradu.A05  | 99198741  | 99198775 | CTCTCTCAACTCCCGTGGAC    | TGCATGCACAATATTCTTGAAA    | 1                |                      |
| Ad05A20171 | Aradu.A05  | 99202187  | 99202200 | TGGATTGGTCTTGTGTGGA     | ATCTTGGGGAGAGGGAGAGA      | 1                |                      |
| Ad05A20175 | Aradu.A05  | 99215571  | 99215600 | AGGGTTTGACATACAAGGG     | TTTTTGAATAAAAATTTCGAGCTG  | 1                |                      |
| Ad05A20182 | Aradu.A05  | 99240371  | 99240382 | GATCAGACATGCCGAAAGGT    | TCCAACATCTAAACCCCAAAA     | 1                |                      |
| Ad05A20185 | Aradu.A05  | 99246452  | 99246504 | CAGGGTATCCTTCACAGTTCAA  | CATGATTTTGTCTGGCTCC       | 2                | Yes                  |
| Ad05A20189 | Aradu.A05  | 99259805  | 99259819 | GCTTCATGGGAAGATTTGGA    | AGATCACAAGCAGTTTCGGC      | 1                |                      |
| Ad05A20190 | Aradu.A05  | 99270374  | 99270385 | TCAATAAATTCATCACGTGAAA  | TGATCGTGCAAGTTTTTCAGA     | 1                |                      |
| Ad05A20201 | Aradu.A05  | 99292503  | 99292516 | CTCGAGGACGAGCAAAATTC    | CTTGGAGGTGGAAGCTTTTG      | 1                |                      |
| Ad05A20202 | Aradu.A05  | 99292989  | 99293004 | GTGCTAGGTGGGAGACAACC    | CCATGCTTTCGCGTAACTTT      | 1                |                      |
| Ad05A20204 | Aradu.A05  | 99300676  | 99300747 | AAGCCACACAACACAACACAA   | CTCAGCGGTCAATAATGCAA      | 1                |                      |
| Ad05A20210 | Aradu.A05  | 99329290  | 99329303 | TAAGACAACAGACCCAGCC     | TCTAACCCGACCCTAAACCC      | 1                |                      |
| Ad05A20211 | Aradu.A05  | 99330636  | 99330653 | AATCTGCGTAACAAAATCTTTCA | GTGTGGAGCATTGCAACAAG      | 1                |                      |
| Ad05A20212 | Aradu.A05  | 99331118  | 99331141 | TCATTGCCTCACATCTCATCA   | GCACCACTCACCACATCATC      | 1                |                      |
| Ad05A20213 | Aradu.A05  | 99333529  | 99333543 | CCACCACTGTTTCAGACCCT    | CACTTTTCCAATGATGGGCT      | 1                |                      |
| Ad05A20214 | Aradu.A05  | 99334961  | 99334981 | GCATTGGGCTTGTAACACCT    | CACATCAAGTCCTGCCAATG      | 1                |                      |
| Ad05A20222 | Aradu.A05  | 99357818  | 99357868 | TTGTCCAGCTTGAGGAGTTGA   | TTCAGATCCCCTCAGGTTTG      | 2                | Yes                  |
| Ad05A20224 | Aradu.A05  | 99371834  | 99371851 | GCAAGAGCATCCGCTTTAAC    | TCAGAGGGTCAAGGAGGCTA      | 1                |                      |
| Ad05A20225 | Aradu.A05  | 99373934  | 99373951 | TACCACCCCTCTCTCCT       | CGTGCCTTACATTTACAAGC      | 1                |                      |
| Ad05A20243 | Aradu.A05  | 99419066  | 99419083 | ATGATTCATCAGGCTTTGGC    | CGTTGGTGATGTGATGGTGT      | 1                |                      |
| Ad05A20244 | Aradu.A05  | 99427771  | 99427788 | AGAGTGTGAGAGAGAGCGCC    | CTCGCTTACAAACACCAAAA      | 1                |                      |
| Ad05A20248 | Aradu.A05  | 99441737  | 99441750 | TTGCAGAAAAGGAAAAACGAA   | CGCGGGTGTGATTTAACTT       | 1                |                      |
| Ad05A20253 | Aradu.A05  | 99449036  | 99449086 | GCCTCGGGAATTTAGATCAC    | GAAATTTCACTTGAGAGTTGAGAGA | 1                |                      |
| Ad05A20254 | Aradu.A05  | 99449645  | 99449664 | CAAAGTCTTCTTAGCCGCCA    | TGAGAGAGCGTGTGATGGAG      | 1                |                      |
| Ad05A20257 | Aradu.A05  | 99482029  | 99482040 | CCTACCCACCTCCAACAATC    | CCTCTTCTCGTGTGAAGC        | 1                |                      |

| ID         | Chromosome | SSR_start | SSR_end  | FORWARD PRIMER (5'-3')     | REVERSE PRIMER (5'-3')      | Bands in parents | Polymorphism in RILs |
|------------|------------|-----------|----------|----------------------------|-----------------------------|------------------|----------------------|
| Ad05A20259 | Aradu.A05  | 99492268  | 99492291 | TGATTGAAAAACGGAATTTGG      | CAACTCAATCCCAACCGAAC        | 1                |                      |
| Ad05A20262 | Aradu.A05  | 99503915  | 99503936 | CTGCAAAGAGCCAAGGTTGT       | GGGTTCGAACATTGGTGAAT        | 2                | Yes                  |
| Ad05A20268 | Aradu.A05  | 99517473  | 99517507 | TGGCCAAATTCAAAAGAGAAGA     | ACAAAACAAGCCAAACGTGG        | 1                |                      |
| Ad05A20270 | Aradu.A05  | 99520772  | 99520786 | TTTACAATGAACACACACATCA     | ATATTCAGGGGAAGCCAACC        | 1                |                      |
| Ad05A20276 | Aradu.A05  | 99533306  | 99533365 | TTTGCTTGTGAATTTTGCATT      | AAAGACAAATTTGGTATTATTCGTAAA | 1                |                      |
| Ad05A20281 | Aradu.A05  | 99563742  | 99563755 | AGGGCATATTTCCACTTCCC       | GTCTAATGGCGAGTTAGCGG        | 1                |                      |
| Ad05A20290 | Aradu.A05  | 99581951  | 99581981 | CGCATACAAGCGATTAAGGC       | AGGAAGAAGAACGTGCACCA        | 1                |                      |
| Ad05A20291 | Aradu.A05  | 99582582  | 99582596 | ATCGTTTGGGTGAATTCCTG       | CCGTTTCCTGTTTTTAAAGCG       | 1                |                      |
| Ad05A20293 | Aradu.A05  | 99583660  | 99583675 | TGATTAGCAGCAGGGAAAGC       | CCAAACCTAGCCGCCTCTAT        | 1                |                      |
| Ad05A20300 | Aradu.A05  | 99599577  | 99599588 | CCACCACTTCGAATGGATTT       | ATGGTGCAGTGTGGACAAA         | 1                |                      |
| Ad05A20301 | Aradu.A05  | 99601617  | 99601656 | TCGGGTTAAGTACGATTTTGG      | CCGACGACAACGAAGCAC          | 1                |                      |
| Ad05A20302 | Aradu.A05  | 99603920  | 99603934 | TTCAAGTATATGCATCAAACTCTTC  | TAAGAGGGCCCTTGGACTTT        | 1                |                      |
| Ad05A20304 | Aradu.A05  | 99604814  | 99604828 | TCAAATGATTGCAAACCAAAA      | GCAGTAGCATCTCCCTTTCG        | 1                |                      |
| Ad05A20307 | Aradu.A05  | 99607772  | 99607783 | ATCATTTGCCTTGTGCCTTC       | GTTGCTGGGTAAAGACCGAA        | 1                |                      |
| Ad05A20308 | Aradu.A05  | 99613231  | 99613248 | CACCACTCAAGCTCAAACCA       | TGGGCATGTGTTGAGGAATA        | 1                |                      |
| Ad05A20309 | Aradu.A05  | 99613600  | 99613611 | AGCCCCACAAGTTTCAAAA        | CCATTTTGACGGCCCTACTA        | 1                |                      |
| Ad05A20312 | Aradu.A05  | 99625358  | 99625381 | ACAACCCACCATGCAAAAAT       | ACGGACTTGAGAGGCAAGAA        | 1                |                      |
| Ad05A20314 | Aradu.A05  | 99639579  | 99639590 | TGAATCATGGACATTTTTCTTTTT   | TTGACATGTTTGTCTGAATGAA      | 1                |                      |
| Ad05A20316 | Aradu.A05  | 99652354  | 99652367 | CATGGCATGCATATTATCATCA     | AGACTTAACTCATTATCTCGTGAGC   | 1                |                      |
| Ad05A20317 | Aradu.A05  | 99653939  | 99653998 | TCTTTCTATCACAAAACATAACATGC | TGTGATCATATGAATTTTACTTGAA   | 1                |                      |
| Ad05A20323 | Aradu.A05  | 99659883  | 99659897 | GCACAAGTCAGCATCGAAAA       | TTTCCTTAGCTTCTTCTCCCA       | 1                |                      |
| Ad05A20327 | Aradu.A05  | 99698482  | 99698493 | AAATTCGGTTCATCCCTTCC       | GCCATCTTGCTCTTTGCTCT        | 1                |                      |
| Ad05A20330 | Aradu.A05  | 99705890  | 99705913 | CGGTAACAAGGCCTCAAAA        | TGAGTTTTGAGTGTGCGTCC        | 1                |                      |
| Ad05A20333 | Aradu.A05  | 99717583  | 99717594 | AACCGAAGCGAAGAAACAAA       | TGGGAAAGAGAGAGTGTGGC        | 1                |                      |
| Ad05A20336 | Aradu.A05  | 99727541  | 99727567 | TCTTAAGGGGAAAGGGGAGA       | TGGCATTGATAGAAGAGTTGGTT     | 1                |                      |
| Ad05A20339 | Aradu.A05  | 99732867  | 99732888 | TGGGTCAGAAAACACACGTC       | GCAGTGTTCCTTGTGGGT          | 1                |                      |
| Ad05A20340 | Aradu.A05  | 99733332  | 99733355 | CGGGTGTGTTGTGATTCTTG       | GGAAGGGTCAATCTCCATT         | 1                |                      |
| Ad05A20342 | Aradu.A05  | 99734569  | 99734599 | TTGTTTGTCTGATATGCACC       | GGCCATTACCATCCACAAGT        | 1                |                      |
| Ad05A20343 | Aradu.A05  | 99737313  | 99737330 | CTATCGACACCTCGAAAGGC       | GATGCAATGAGGAGAGCACA        | 1                |                      |
| Ad05A20344 | Aradu.A05  | 99738525  | 99738554 | TTTTTGTCTGCTTTAGACCGA      | CGGAAGTTAAAAGGCCCAAT        | 1                |                      |
| Ad05A20349 | Aradu.A05  | 99784298  | 99784319 | TTTGGCTGATTCCTGAAACC       | TCTTCACAAATTCGGAGC          | 1                |                      |
| Ad05A20355 | Aradu.A05  | 99796158  | 99796169 | CGCTCACCATCCTTCTTCTT       | TTCAATTTAGTGGATGATCG        | 1                |                      |
| Ad05A20362 | Aradu.A05  | 99813266  | 99813307 | TGCATGAAAGAGAAAGGAAAA      | GGTTTGTTCCTCATGAAAG         | 1                |                      |

| ID         | Chromosome | SSR_start | SSR_end   | FORWARD PRIMER (5'-3')     | REVERSE PRIMER (5'-3')    | Bands in parents | Polymorphism in RILs |
|------------|------------|-----------|-----------|----------------------------|---------------------------|------------------|----------------------|
| Ad05A20363 | Aradu.A05  | 99815350  | 99815363  | GAGAGTTTTACGCCGGTGAG       | GAGAAGATGGTAAGCGCTGC      | 1                |                      |
| Ad05A20364 | Aradu.A05  | 99822932  | 99822958  | AATCACAATGGGCTGAGAGG       | TTCAGGAGGCTAAGGCAAAA      | 1                |                      |
| Ad05A20365 | Aradu.A05  | 99831889  | 99831918  | TGCCAGAAAGGAATTGATCC       | TGCTTTGTGTTGCATAACTGG     | 1                |                      |
| Ad05A20369 | Aradu.A05  | 99838768  | 99838785  | CGGATGGTACACAAATCGG        | GACCGGATCGACTAGGTGAC      | 1                |                      |
| Ad05A20371 | Aradu.A05  | 99839795  | 99839809  | CGCTCCTTCACCGTTACTTT       | GAAACACGCGAAGAAAAAGG      | 1                |                      |
| Ad05A20374 | Aradu.A05  | 99854852  | 99854866  | AGAAAATGAATTTAGGCATAGACTG  | CAACAAAAAGCAAATTACGATCA   | 1                |                      |
| Ad05A20381 | Aradu.A05  | 99866568  | 99866579  | GTAACCACACGTCCCCTGTC       | GGACTCGTAGTGGCCATTTG      | 1                |                      |
| Ad05A20387 | Aradu.A05  | 99872349  | 99872363  | GCGTGGGTTGAAAGTCTTAA       | TGACTGAGGGAATACGGAGG      | 1                |                      |
| Ad05A20394 | Aradu.A05  | 99887781  | 99887794  | CAGGAACGAAGTCTTTGGT        | AATCACGTTTCTGAGCGTT       | 1                |                      |
| Ad05A20396 | Aradu.A05  | 99898866  | 99898917  | GCCGTGGCATTCAATTTTATT      | TGGTTATTTTGGATAGTATGAGCG  | 2                | Yes                  |
| Ad05A20402 | Aradu.A05  | 99904319  | 99904330  | AAGTATAAAAATCCCTCCCC       | GATTAATTAGAAGAGTTTGTAGGCA | 1                |                      |
| Ad05A20403 | Aradu.A05  | 99909880  | 99909900  | TGAGTGTTTTGCAGAGAATGAAA    | TCCGAATCACTATTGTCCCA      | 1                |                      |
| Ad05A20405 | Aradu.A05  | 99914008  | 99914025  | TGCAAATCTAATATCTTCACCGA    | TGGTGAAATATGGGCAAACA      | 1                |                      |
| Ad05A20407 | Aradu.A05  | 99915947  | 99915976  | CGGTACTGCGTGTGAGAAAA       | TCGAAGAGGAGGACGAGGTA      | 1                |                      |
| Ad05A20408 | Aradu.A05  | 99920942  | 99920956  | CGGATTAGCACACCTATCG        | CTTGCCGGTAAGTTGTGGAT      | 1                |                      |
| Ad05A20412 | Aradu.A05  | 99942362  | 99942376  | CCTCCCTCAACACCACAACCT      | AGAGAGAAAGGCTGGGAAGC      | 1                |                      |
| Ad05A20413 | Aradu.A05  | 99942591  | 99942606  | ACACCATCAAGGACTACCGC       | CCTAACCTTGCTTGTTCCTCC     | 1                |                      |
| Ad05A20414 | Aradu.A05  | 99947088  | 99947099  | CTAGACTCGGCTTGCGAAAC       | CTTATCGATGGAGGAGCCAA      | 1                |                      |
| Ad05A20418 | Aradu.A05  | 99951992  | 99952007  | TTCAATTCACTAAGTATGCAGATGG  | TTTGACATCCATTACCTAAACGG   | 1                |                      |
| Ad05A20419 | Aradu.A05  | 99953435  | 99953449  | AGGTCTGATGGGTTCAATGG       | TTGTGTTTCTTATTTTCTTCCCTC  | 1                |                      |
| Ad05A20421 | Aradu.A05  | 99957978  | 99958072  | AGGTTGCTTTGGACAACCAG       | GGATCAAAGAAAAGCCTCCC      | 1                |                      |
| Ad05A20422 | Aradu.A05  | 99961750  | 99961770  | GGTAAATGCCACTTCTCGCT       | AGCTGACCTGCTAACCAGCA      | 1                |                      |
| Ad05A20424 | Aradu.A05  | 99973187  | 99973200  | CCGGAATCTGTGAGTTCCAT       | TGATACGGATACGGTCCCAT      | 1                |                      |
| Ad05A20427 | Aradu.A05  | 99979890  | 99979903  | TCAACTCCTCTCGCACATGA       | CGCCATTTTCATTCTCCTTC      | 1                |                      |
| Ad05A20428 | Aradu.A05  | 99994490  | 99994503  | GAGATTCTTTCTTTGATTTTCCAA   | ATGCAATCCCCATTTCAATGT     | 1                |                      |
| Ad05A20431 | Aradu.A05  | 99999972  | 100000019 | TGAAATTGTTTGTATGTTAAAAGTGT | TCCGAGAACCCTACAAAACG      | 1                |                      |
| Ad05A20432 | Aradu.A05  | 100003384 | 100003395 | TATACGGCGTCGTTTAAGCC       | AGAATTCAATGGCGTTGTCC      | 1                |                      |
| Ad05A20433 | Aradu.A05  | 100003518 | 100003535 | TATACGGCGTCGTTTAAGCC       | AGAATTCAATGGCGTTGTCC      | 1                |                      |
| Ad05A20434 | Aradu.A05  | 100007572 | 100007589 | TTCATCTGATTGACCCACCA       | TCTCAATATCCCGTGCTTGT      | 1                |                      |
| Ad05A20436 | Aradu.A05  | 100014533 | 100014574 | TTTCGAAATGACTAAATGTGTCAAG  | ACTATCCGCAAAGCAAGCAT      | 1                |                      |
| Ad05A20437 | Aradu.A05  | 100017589 | 100017600 | CATTGGTCCCGAAGTACCAT       | TGGATCAGACAAGTATGCCG      | 1                |                      |
| Ad05A20438 | Aradu.A05  | 100022317 | 100022331 | ACCTGCTATTATTGGTGGCG       | CGACTTGTTTCTCTGCTTCC      | 1                |                      |
| Ad05A20440 | Aradu.A05  | 100025799 | 100025818 | TTAACCTTTGTGTAACACTCCGA    | GATGAAGCCCGGTTCAATTA      | 1                |                      |



| ID         | Chromosome | SSR_start | SSR_end   | FORWARD PRIMER (5'-3')     | REVERSE PRIMER (5'-3')   | Bands in parents | Polymorphism in RILs |
|------------|------------|-----------|-----------|----------------------------|--------------------------|------------------|----------------------|
| Ad05A20441 | Aradu.A05  | 100031680 | 100031704 | GAAGATCCAGGCATTTAAGAGG     | TTGGCATCAGCAAATACAGTG    | 1                |                      |
| Ad05A20444 | Aradu.A05  | 100036767 | 100036778 | AAATGGGACCACAAATTCAGA      | TGAAGGGATGGCTCAAATTC     | 1                |                      |
| Ad05A20454 | Aradu.A05  | 100069430 | 100069444 | GAAAAAGGATCTTGCGTTGAA      | TTGAGATCCTCACATGACGC     | 1                |                      |
| Ad05A20456 | Aradu.A05  | 100078247 | 100078290 | CACACAAACACACCCACACA       | GCTTTTTCTTCGTTTTTCCCC    | 1                |                      |
| Ad05A20457 | Aradu.A05  | 100078652 | 100078679 | GGAAAACGAAGAAAAAGCCC       | ATTGTTGAGCGGCTACTCGT     | 1                |                      |
| Ad05A20461 | Aradu.A05  | 100083751 | 100083764 | CATCCACCTCCATGAGATCC       | AGCGTAGTGGCTACGAAGGA     | 1                |                      |
| Ad05A20462 | Aradu.A05  | 100085814 | 100085829 | GCTCCTAACCCAACCTGTGA       | AGTTCTGCAGCGAAGTGGAT     | 1                |                      |
| Ad05A20464 | Aradu.A05  | 100100060 | 100100085 | ACCATTTTAAAAGCGCGACA       | GCAAAGCAAAACAATGCAGA     | 1                |                      |
| Ad05A20472 | Aradu.A05  | 100132057 | 100132072 | GGTTCCATCACACTCACACG       | TGCCAAGTATGCAGGACAGA     | 1                |                      |
| Ad05A20478 | Aradu.A05  | 100146628 | 100146677 | CCGGTGTGTGCTCTCTCTTT       | ACAATTGCATTCAACCCCAT     | 2                | Yes                  |
| Ad05A20495 | Aradu.A05  | 100187040 | 100187060 | GGGGATCCCAAGTACAGTCA       | GGACTTGTGTCTCCCTTTTCG    | 1                |                      |
| Ad05A20498 | Aradu.A05  | 100194421 | 100194479 | CGTCATCTTTTTCTCTTCTTTT     | TGATGATCATGATGACGAAGG    | 1                |                      |
| Ad05A20499 | Aradu.A05  | 100196163 | 100196186 | ACCAAGGAGAGGAGGAGGAA       | CGCGGGGCTTTACATTATT      | 2                | Yes                  |
| Ad05A20506 | Aradu.A05  | 100215948 | 100215962 | TGAATCCATGCCATCTTCAA       | AAAGCTGCAAGCTCGTTAGG     | 1                |                      |
| Ad05A20508 | Aradu.A05  | 100219511 | 100219528 | TGACTCAAGATGGTGTGGGA       | AGATGGCAATCCGGTAGATG     | 1                |                      |
| Ad05A20509 | Aradu.A05  | 100221309 | 100221356 | ACGAGGAGCTGAGCAACAAT       | CCCTACCTTAGCCAAACCCT     | 2                | Yes                  |
| Ad05A20510 | Aradu.A05  | 100227408 | 100227422 | TCTGCGTGATGTTTGTGTTGT      | GCGTCATATTGGCAAGGACT     | 1                |                      |
| Ad05A20511 | Aradu.A05  | 100228169 | 100228198 | AAAATACCTGTGCGATATTTGC     | GAGTTATCCTTGCGCCCAT      | 1                |                      |
| Ad05A20512 | Aradu.A05  | 100231202 | 100231216 | AAATATTCGCGTGATGTTTGC      | GTTATCCCTGCGCTCACATT     | 1                |                      |
| Ad05A20517 | Aradu.A05  | 100236479 | 100236498 | AACTGCTGGTTGCACTTTAGAA     | CACATCACCATCAAATCCA      | 1                |                      |
| Ad05A20518 | Aradu.A05  | 100237286 | 100237300 | TTCTCTTCCTCATCTTCTGC       | CAAAAATGTTTCCTTTAATGCTG  | 1                |                      |
| Ad05A20521 | Aradu.A05  | 100254193 | 100254243 | AAAACCTGTCTTGAAATTGATTTTGT | CCCAATTCATTGTTTTTCTGG    | 1                |                      |
| Ad05A20526 | Aradu.A05  | 100266792 | 100266803 | CACACGCAATAGCTCCTTGA       | GTTGCACCACGGTATCACAG     | 1                |                      |
| Ad05A20527 | Aradu.A05  | 100269727 | 100269744 | TGACTAAGTTTTAATTTTCGCTTC   | TCGCTGTAAGAATTATATCCATGA | 1                |                      |
| Ad05A20530 | Aradu.A05  | 100276496 | 100276519 | GCTCAAGTATCCCATCCAACC      | GGTGACATTCATGTATCCGT     | 1                |                      |
| Ad05A20531 | Aradu.A05  | 100277279 | 100277292 | AGTGAGCAAGGGAAACAAATG      | AAGCAGCATGATTTTGACACA    | 1                |                      |
| Ad05A20532 | Aradu.A05  | 100277892 | 100277905 | GGCCTTCATCCTTTTTTCA        | GGCCAAAAGGAGTGGTGATA     | 1                |                      |
| Ad05A20533 | Aradu.A05  | 100279312 | 100279326 | CGGGTAATTTGTTGACTGGG       | TACCGCCACTGTCGTTATCA     | 2                | Yes                  |
| Ad05A20534 | Aradu.A05  | 100280129 | 100280146 | AAAATTTTTCTTAAGGGCCAAAA    | CAAGTGAACCAAAATTAACACACA | 1                |                      |
| Ad05A20535 | Aradu.A05  | 100280441 | 100280455 | CCGAAATTATTTAATGATGGCA     | TTCCAACGAAGCACACGTAG     | 1                |                      |
| Ad05A20549 | Aradu.A05  | 100299892 | 100299930 | CAATTCATTTCTCCAATAACCA     | TTTCCCCTCTTGTGTTGAGGT    | 1                |                      |
| Ad05A20552 | Aradu.A05  | 100308564 | 100308578 | CCAGAACCATAATCAAGCCAA      | TCATGTAGCCAACCCCATTT     | 1                |                      |
| Ad05A20558 | Aradu.A05  | 100316590 | 100316610 | AAACATTAACCTCCTCTTCTCC     | GGTGCCAAATCCCTAACTTG     | 1                |                      |

| ID         | Chromosome | SSR_start | SSR_end   | FORWARD PRIMER (5'-3')    | REVERSE PRIMER (5'-3')   | Bands in parents | Polymorphism in RILs |
|------------|------------|-----------|-----------|---------------------------|--------------------------|------------------|----------------------|
| Ad05A20560 | Aradu.A05  | 100323417 | 100323444 | AACACCCACTTTTCCTCACG      | GGGTAACGAGGTGCTCAAAA     | 1                |                      |
| Ad05A20568 | Aradu.A05  | 100340859 | 100340894 | CCACTCCTGGACCCAATAAA      | CTTGGTGCCCCATTGATACT     | 1                |                      |
| Ad05A20570 | Aradu.A05  | 100343797 | 100343850 | TGCCAAAAACTCCTTTTCGTT     | AAGCCAGGTAGCACCCCTCTT    | 2                | Yes                  |
| Ad05A20571 | Aradu.A05  | 100352718 | 100352729 | ATAGGGAGCTCTTGGGCATT      | GGGGATGAGGTTAGGACGAT     | 1                |                      |
| Ad05A20572 | Aradu.A05  | 100352834 | 100352943 | GCGCGCACATTGTACTTCT       | AGAGAAAAGCAGGGTGCAAA     | 1                |                      |
| Ad05A20577 | Aradu.A05  | 100359388 | 100359403 | GATTCGGTTCGGGTAATTGA      | ATATCGATTCTGGAGGTGCG     | 1                |                      |
| Ad05A20581 | Aradu.A05  | 100362260 | 100362274 | TTCTCACCCCCTAAATCCCC      | AATCAGCGAATGAATCCAGG     | 1                |                      |
| Ad05A20585 | Aradu.A05  | 100378859 | 100378876 | CATGTTATTTTAGAAGGAGTTTGGT | TCATCATTTCGTCACGGAAAA    | 1                |                      |
| Ad05A20586 | Aradu.A05  | 100379167 | 100379182 | TTTTCCGTGACGAATGATGA      | CCGAACCGGACCATATACAC     | 1                |                      |
| Ad05A20590 | Aradu.A05  | 100385684 | 100385695 | CTCTCCATCAAACGCTACCC      | CGTATCCACGAGTTCCCACT     | 1                |                      |
| Ad05A20591 | Aradu.A05  | 100386444 | 100386492 | TGTTTCGTTGCGACACAAGAT     | ATGGAGCTTGTTTGTGGG       | 1                |                      |
| Ad05A20592 | Aradu.A05  | 100386903 | 100386922 | GGTCGAGAAATGATAGGATAACCA  | TGAGTCTCAATCTCCAAATCTCT  | 1                |                      |
| Ad05A20593 | Aradu.A05  | 100387420 | 100387431 | TCTACCAAACGCTACCCAATG     | TGAAAAGTGGTGCTTTGCAG     | 1                |                      |
| Ad05A20594 | Aradu.A05  | 100390150 | 100390167 | TGCATAGACCCTTGAAATCCA     | ATGCACAATTGTTGCTGAGG     | 1                |                      |
| Ad05A20598 | Aradu.A05  | 100404014 | 100404029 | CATACACTTCCAAGCCAGTCAA    | CCGAGCCGAACCATATACAC     | 1                |                      |
| Ad05A20601 | Aradu.A05  | 100408938 | 100408949 | TTCGTTGTTTGATTGCTTAGATT   | GCAGAGAAGTCCCTGTGAGG     | 1                |                      |
| Ad05A20602 | Aradu.A05  | 100411036 | 100411084 | TGTTTCGTTGCGACACAAGAT     | ATGGAGCTTGTTTGTGGG       | 1                |                      |
| Ad05A20603 | Aradu.A05  | 100411495 | 100411514 | GGTCGAGAAATGATAGGATAACCA  | TGAGTCTCAATCTCCAAATCTCT  | 1                |                      |
| Ad05A20604 | Aradu.A05  | 100412012 | 100412023 | TCTACCAAACGCTACCCAATG     | TGAAAAGTGGTGCTTTGCAG     | 1                |                      |
| Ad05A20605 | Aradu.A05  | 100413815 | 100413829 | AACGTTTCGTTACACTCCC       | CATGCATGGCTAAAGGCTAA     | 1                |                      |
| Ad05A20606 | Aradu.A05  | 100419744 | 100419758 | TCAAGGTTCTGTGAGTCCC       | TTGCCTGCAAAATTTCTTGA     | 1                |                      |
| Ad05A20614 | Aradu.A05  | 100447565 | 100447579 | ACCAAGGAAAGGAGGAGGAA      | GTTCCCAGTTAATCCGGTCA     | 1                |                      |
| Ad05A20617 | Aradu.A05  | 100451047 | 100451079 | TTCCAACACCAATTCATCCA      | GTGCCTCCTAATCCCCAGAT     | 2                | Yes                  |
| Ad05A20619 | Aradu.A05  | 100456887 | 100456928 | ACTCCTGGCCCCAATAAATC      | CTTGGTGCCCCATTGATACT     | 1                |                      |
| Ad05A20622 | Aradu.A05  | 100462687 | 100462701 | GAGGTGAGGGAGAAAGAGGC      | CCTTACCCTCTCTGCGTTGT     | 1                |                      |
| Ad05A20623 | Aradu.A05  | 100467379 | 100467436 | ACAGAGAGCTCCGCATTGTT      | TATTACCATCCTGCCTTCGG     | 1                |                      |
| Ad05A20624 | Aradu.A05  | 100470102 | 100470113 | CGATGGCGTAACCGTATTCT      | CCGGGATCTGAAGAAATGAA     | 1                |                      |
| Ad05A20627 | Aradu.A05  | 100476939 | 100476953 | ATGGCCATAGCAGCTCAAAC      | TGATTTGAATAACACAAATGCTGA | 1                |                      |
| Ad05A20630 | Aradu.A05  | 100480052 | 100480083 | TGATTTCTTGGGAAATGCGT      | TTTCTCGCTTGCACTTCCTT     | 1                |                      |
| Ad05A20637 | Aradu.A05  | 100505886 | 100505919 | TTAATCGGAATAATCGGCG       | AAGCGCATCGAGTCTCTCTC     | 1                |                      |
| Ad05A20639 | Aradu.A05  | 100507695 | 100507708 | GGCTCAAGATCTCAGCAAGC      | AATCGAATTCGTCTTGTGC      | 1                |                      |
| Ad05A20643 | Aradu.A05  | 100516682 | 100516737 | TGCATTCAACAGCAAGGAAC      | ACAGGTTAGCCGTATGGTC      | 2                | Yes                  |
| Ad05A20646 | Aradu.A05  | 100524382 | 100524439 | CGACGATGAGAGAGAAAGGG      | GAAAAAGCAAACGGTGTCTGT    | 1                |                      |

| ID         | Chromosome | SSR_start | SSR_end   | FORWARD PRIMER (5'-3')    | REVERSE PRIMER (5'-3')       | Bands in parents | Polymorphism in RILs |
|------------|------------|-----------|-----------|---------------------------|------------------------------|------------------|----------------------|
| Ad05A20648 | Aradu.A05  | 100526481 | 100526498 | TTCGTCGTTGATGGTTTGAA      | ACGGAAGCGGGATAAGACTA         | 1                |                      |
| Ad05A20649 | Aradu.A05  | 100531727 | 100531750 | CAAGATAAACCTCTTGGTCCG     | TAGCGTCGTTTGATCCATGT         | 1                |                      |
| Ad05A20650 | Aradu.A05  | 100538453 | 100538530 | TTGCCCTATATTCTGCTC        | AAGGTGGTGTGGGATTACGA         | 2                | Yes                  |
| Ad05A20653 | Aradu.A05  | 100553322 | 100553336 | CCGCCATCTCGATGTTAGAT      | CCTCAGACCTTAGGGACGAA         | 1                |                      |
| Ad05A20655 | Aradu.A05  | 100560029 | 100560085 | TCGTTAGAAACAAGCAAAATGAA   | CACACACGAGTCGTAAGTCCA        | 1                |                      |
| Ad05A20656 | Aradu.A05  | 100560207 | 100560226 | CTGATGGGTCTGCTTCCAAT      | ATTCTTGGACGGTTCCTCT          | 1                |                      |
| Ad05A20659 | Aradu.A05  | 100561762 | 100561798 | AGCTCAGTACCGCAGCAGAT      | GTCACAGCATTGCGTTTAGC         | 1                |                      |
| Ad05A20661 | Aradu.A05  | 100569631 | 100569644 | TCTGTGAATTTGTCCACCA       | TTTCGCTTTCAAACACCTCC         | 1                |                      |
| Ad05A20670 | Aradu.A05  | 100595099 | 100595110 | AGTGAAAATGGAAAGCCCCT      | AAACGGTCAATCCCCTGAA          | 1                |                      |
| Ad05A20675 | Aradu.A05  | 100616059 | 100616092 | TAATAACGACGACGGCTTCA      | TCACTAACGACTAATAAAAAGTGTGGG  | 1                |                      |
| Ad05A20677 | Aradu.A05  | 100625606 | 100625659 | TTTGGTCATTGTCAAATCCTT     | TGCTGTCAGTCATTTTACAGGAA      | 2                | Yes                  |
| Ad05A20694 | Aradu.A05  | 100669515 | 100669532 | AGTGCCAGTGGCAAATAAC       | GTTGTTGGTGTGTTGCAGG          | 1                |                      |
| Ad05A20699 | Aradu.A05  | 100699839 | 100699850 | TGACTCACAAATTATGATCCGAAC  | TTTATTATTTTTATTTCGAGTAATTGCC | 1                |                      |
| Ad05A20700 | Aradu.A05  | 100700320 | 100700331 | TCCGCTTCTCTGGAAATGG       | AATGCACAAGAACCAAGAACA        | 1                |                      |
| Ad05A20701 | Aradu.A05  | 100700649 | 100700678 | TCCTGTGTGGTGTAAATACGCT    | GCAAAGGAAATTCGGTGAAG         | 1                |                      |
| Ad05A20704 | Aradu.A05  | 100710658 | 100710673 | GAGCACTGTGGGTACAGCAA      | GGGAGACACACAAGGAAGGA         | 1                |                      |
| Ad05A20709 | Aradu.A05  | 100726088 | 100726101 | CGTCGATTTGTGGCTCTTG       | GTGAGGTGTTGGTGGTGATG         | 1                |                      |
| Ad05A20710 | Aradu.A05  | 100730679 | 100730693 | TGACCCACTATCTCTCCCTCA     | AGCATCAACCATGCACCATA         | 1                |                      |
| Ad05A20711 | Aradu.A05  | 100738429 | 100738443 | TGGTTGAGAGATAAAAACTTGCT   | GGCGCTAGATGAGGAGTACG         | 1                |                      |
| Ad05A20715 | Aradu.A05  | 100756211 | 100756231 | CGATCCCTATCGTAATTATTCGT   | TATGGGACATGGAAAAAGGG         | 1                |                      |
| Ad05A20716 | Aradu.A05  | 100758226 | 100758243 | CGAATCTTCTGGTTGTCAGG      | GGCATGGGATGCTATTATCAA        | 1                |                      |
| Ad05A20717 | Aradu.A05  | 100758750 | 100758761 | TCCTTGCCTAGCAATTCTTCA     | CCTATGGGGTTCATACACTAACGA     | 1                |                      |
| Ad05A20718 | Aradu.A05  | 100759500 | 100759511 | CCATAGGGTGTAGGTGTCCA      | TCGTAGAATCACTAAAAATGGGA      | 1                |                      |
| Ad05A20719 | Aradu.A05  | 100759687 | 100759704 | TCCCATTTTTAGTGATTCTACGA   | CCAACATCCATGGGAGTTTAGT       | 1                |                      |
| Ad05A20721 | Aradu.A05  | 100771286 | 100771300 | AGAAGAGAGGAACGAAGCCC      | CAGAAACAGCAGCAACCAAAA        | 1                |                      |
| Ad05A20723 | Aradu.A05  | 100774678 | 100774697 | TGCTGGAGGTGTAGATGCAG      | TGGGAGGTTTGAGCCAATAG         | 1                |                      |
| Ad05A20724 | Aradu.A05  | 100776851 | 100776875 | CGCCCAATTCCATTACTTGT      | AGAGAGATGGGGAATGGAGC         | 1                |                      |
| Ad05A20728 | Aradu.A05  | 100792689 | 100792706 | AAGAAATCACAATGGGCTGG      | AGATGGCGAAGACAAATGCT         | 1                |                      |
| Ad05A20729 | Aradu.A05  | 100801819 | 100801833 | TCCATGAGGTGGTCAAACAA      | CCTGTCAAAAATAAAAACCTCG       | 1                |                      |
| Ad05A20733 | Aradu.A05  | 100810654 | 100810665 | AAAGGTATGAGGCAAGAACTCAA   | CACGCCTTAGTTTGAGGGAA         | 1                |                      |
| Ad05A20734 | Aradu.A05  | 100815130 | 100815187 | GCAGTACTGAGTGATGCGGA      | AAGGAGGTTAGCGTGTGGTG         | 2                | Yes                  |
| Ad05A20744 | Aradu.A05  | 100846337 | 100846408 | GATCTGCTACAATCTTCTCAAGACA | CATGCAATCAAAACAGAGGC         | 1                |                      |
| Ad05A20745 | Aradu.A05  | 100850723 | 100850758 | AATTTTGTGAGTTGGCGCT       | ATGGCCAATCAGAGAGAACG         | 1                |                      |

| ID         | Chromosome | SSR_start | SSR_end   | FORWARD PRIMER (5'-3')      | REVERSE PRIMER (5'-3')      | Bands in parents | Polymorphism in RILs |
|------------|------------|-----------|-----------|-----------------------------|-----------------------------|------------------|----------------------|
| Ad05A20750 | Aradu.A05  | 100853450 | 100853498 | TCTGTCGTCCAAACGCTAAG        | TGTTGATGAGGTGATTGATGC       | 1                |                      |
| Ad05A20753 | Aradu.A05  | 100860260 | 100860275 | TTTTTCCTTCATCGGGTTTC        | TGCAGTTTTGCAGCCACTTA        | 1                |                      |
| Ad05A20754 | Aradu.A05  | 100862102 | 100862115 | TGTCATTCTTAAATTATGGGTTTTT   | GCAACAAGGGTTGCAAACAA        | 1                |                      |
| Ad05A20755 | Aradu.A05  | 100868457 | 100868468 | CGACCCTCTGTGATGTACCA        | GGTTGAATGTCCACATAATTTCG     | 1                |                      |
| Ad05A20756 | Aradu.A05  | 100869456 | 100869470 | TTGAAAGTGAAGTACCAAAAATTGA   | TATGTGTGTGATTGTGGGGG        | 1                |                      |
| Ad05A20757 | Aradu.A05  | 100871700 | 100871717 | TGGTTGATTCTAAAATTGTGCC      | TATTGATGCCGTGTGTCCAT        | 1                |                      |
| Ad05A20763 | Aradu.A05  | 100922406 | 100922417 | GTCAGCAAACGAGAAGGAGG        | AATTGATTTGGGTGGAGCAC        | 1                |                      |
| Ad05A20767 | Aradu.A05  | 100935607 | 100935645 | GGGATCGTCTTCAACATTGC        | TCATGAAAAGTGAACCCGGG        | 1                |                      |
| Ad05A20769 | Aradu.A05  | 100945292 | 100945327 | AGTCCCTGTCACCAAAATCG        | CCGCTCTCTTCACTCCTCAC        | 2                | Yes                  |
| Ad05A20777 | Aradu.A05  | 100976576 | 100976590 | TGGCAACAATTAGTTGACCTTT      | TGTCATTTCCCCCAACTATCA       | 1                |                      |
| Ad05A20778 | Aradu.A05  | 100978831 | 100978881 | CCTTTTAAAATATAATGCATGTACCG  | TGAAATCAATATTCAATGCGTTA     | 1                |                      |
| Ad05A20781 | Aradu.A05  | 100992474 | 100992488 | CCTTCGGGCTCTTCTTTTCT        | TGAAGAACGAAAACAATTCTCTG     | 1                |                      |
| Ad05A20782 | Aradu.A05  | 100995011 | 100995022 | CCATGTACTTATGTATGTCGGATCT   | TGAGCAATTAATCTCCACTGTT      | 2                | Yes                  |
| Ad05A20785 | Aradu.A05  | 101001213 | 101001278 | CCACACAATGCGTGTTTTCT        | GTTGTGAGTGTGTCAGTGGG        | 2                | Yes                  |
| Ad05A20787 | Aradu.A05  | 101005914 | 101005955 | TTTCGTTAGAAACAAGTAATAAGGTGA | TTTCAACATTTTTCTTCATCAGACA   | 1                |                      |
| Ad05A20789 | Aradu.A05  | 101010707 | 101010720 | AACCGAAAAATTAGTGAATCAAA     | TTCTAACATTTTACTTCTCTGCCA    | 1                |                      |
| Ad05A20793 | Aradu.A05  | 101016116 | 101016127 | GTCCCTCAATTTTCAGCCAGA       | TCATTAAGAGTTTTAGATAAAGGCTCC | 1                |                      |
| Ad05A20794 | Aradu.A05  | 101016346 | 101016360 | TTCCTCAAATTTTCGATTTGC       | ATGGTGGTGATGGAGATGGT        | 1                |                      |
| Ad05A20796 | Aradu.A05  | 101022170 | 101022190 | TGTGTTTGGATGGAAAGAAAA       | TTTTATCAAATTAGAACACGCTAACT  | 1                |                      |
| Ad05A20801 | Aradu.A05  | 101039817 | 101039838 | GCCCTCTCCCCTTATTTTG         | TTTGGCAAACAGTGATAGCG        | 2                | Yes                  |
| Ad05A20806 | Aradu.A05  | 101055740 | 101055806 | TGTAGGTTTCATCCTCTTCCAA      | GAATTTTCGGTGCATGTGTG        | 1                |                      |
| Ad05A20823 | Aradu.A05  | 101118206 | 101118230 | ATTGAAAAGGAAGCTGGTGC        | AGTTCCAAGCGGTGCTTTTA        | 1                |                      |
| Ad05A20830 | Aradu.A05  | 101125151 | 101125183 | TGGCACTCTTCTTTCTTTTACG      | AAATTTGAGTCTTCCTATCTTCGG    | 1                |                      |
| Ad05A20835 | Aradu.A05  | 101157814 | 101157827 | CATGTAAGAGATCGCGGGTT        | TCACCGTTTTCTCTGCTCT         | 1                |                      |
| Ad05A20839 | Aradu.A05  | 101161001 | 101161015 | TTTGCATTTGCACCATTACA        | GGCATGTTTGAGCTTTGTGA        | 1                |                      |
| Ad05A20854 | Aradu.A05  | 101192615 | 101192626 | GGACCTTGGGTGTGGTAAGA        | GGGAAACCGAAACCATACT         | 1                |                      |
| Ad05A20856 | Aradu.A05  | 101219712 | 101219726 | TACCGATGCAATGATGGAAA        | TTATCATCAGGGCGAAGAGG        | 1                |                      |
| Ad05A20858 | Aradu.A05  | 101229012 | 101229092 | GTGAGGGCAAATTTTGGAGA        | TTATGCCAAAACATAAAAAGATCAA   | 1                |                      |
| Ad05A20863 | Aradu.A05  | 101239357 | 101239413 | CCTTTTTAAAATATAATGCATGTACCG | TGCACACATTAATAGTGACCCAT     | 1                |                      |
| Ad05A20869 | Aradu.A05  | 101259696 | 101259722 | ACAGGGAGTTTGCTGTAGCG        | ATCCCTCCTCCTTCATTTTCG       | 1                |                      |
| Ad05A20873 | Aradu.A05  | 101289456 | 101289469 | AGCATGAACAGTTGGAAAGGA       | CACAGAACGCCAGAAAACAA        | 1                |                      |
| Ad05A20875 | Aradu.A05  | 101290587 | 101290612 | CAAGTTCATGCATATTCAAGGC      | AATTTTCATTGATGCCGTGGT       | 2                | Yes                  |
| Ad05A20877 | Aradu.A05  | 101294965 | 101294980 | AGAGGTGGGTGGAGTTAGG         | AACCGTAGTCGCTGCAATT         | 1                |                      |

| ID         | Chromosome | SSR_start | SSR_end   | FORWARD PRIMER (5'-3')      | REVERSE PRIMER (5'-3')      | Bands in parents | Polymorphism in RILs |
|------------|------------|-----------|-----------|-----------------------------|-----------------------------|------------------|----------------------|
| Ad05A20879 | Aradu.A05  | 101299223 | 101299236 | TATTCTATCCATGGGGCCTG        | GGATGATTATGAATTTAACTCACTT   | 1                |                      |
| Ad05A20881 | Aradu.A05  | 101306840 | 101306857 | AGCTTCGTGCTGATAACGTG        | AAATAGAAGGGGTTTGAGGCA       | 1                |                      |
| Ad05A20886 | Aradu.A05  | 101321237 | 101321318 | TCGAAAAATATCGACGGAAGA       | TGCGTAGGATAATAATAATAAATCGTT | 1                |                      |
| Ad05A20887 | Aradu.A05  | 101321472 | 101321525 | TTTTTCAACAGACTTAATAAGCATCA  | ATTTGGATCATCCTCAATGG        | 1                |                      |
| Ad05A20891 | Aradu.A05  | 101327367 | 101327381 | CATCTTCCAAGTAATTTTGCAGG     | TGCGTGCTGATAAGTTCTGC        | 1                |                      |
| Ad05A20892 | Aradu.A05  | 101327764 | 101327778 | CAAGAAGAACTTGAGAAGATAAAAACA | TCGCAACAAATTTGGGTGTA        | 1                |                      |
| Ad05A20893 | Aradu.A05  | 101328311 | 101328388 | GAGGAAGAAAAGCAGCAGGA        | TATTCATGCACGCACGTTTTT       | 1                |                      |
| Ad05A20898 | Aradu.A05  | 101358857 | 101358871 | CCATGAGAAGCAAAGAGGTTG       | TGATGGTGCATGTTTATTGTTT      | 1                |                      |
| Ad05A20899 | Aradu.A05  | 101359306 | 101359329 | GAGCAATGTTAGGGGACAGC        | GGCATTATTGGGGTCAATG         | 1                |                      |
| Ad05A20902 | Aradu.A05  | 101367257 | 101367270 | CAGCAAGTCTCCAGCACTCA        | CCAAGTGTTTTCTGTGGGG         | 1                |                      |
| Ad05A20907 | Aradu.A05  | 101386203 | 101386216 | GCCAAAGGATACGTGCAAAT        | AACGAGGATGCACTTCTGAG        | 1                |                      |
| Ad05A20908 | Aradu.A05  | 101392714 | 101392734 | CTTCCCCAAAATCAACCAGA        | TTGCTAAAAGTTGCTGCTGAA       | 1                |                      |
| Ad05A20913 | Aradu.A05  | 101416100 | 101416111 | GGACAATTGGCACTCAATCA        | TGCCGCAGAATGATACAAAA        | 1                |                      |
| Ad05A20916 | Aradu.A05  | 101423270 | 101423371 | CAGCAACAATAGCAGAGATTGC      | TTTTGCAACACAAAAATGGC        | 1                |                      |
| Ad05A20921 | Aradu.A05  | 101438644 | 101438658 | ACCAATGTGTCAGGCTCCTC        | TTCCAGCCATTATTAGGCG         | 1                |                      |
| Ad05A20924 | Aradu.A05  | 101459824 | 101459841 | CACACTCGCATGGTTAATCG        | TGTTTGTCTTCTTAGTGGTTG       | 1                |                      |
| Ad05A20930 | Aradu.A05  | 101481449 | 101481477 | CCTTTTATTCGCAGGTCGAG        | GAGGTGGGGAGGTATTACGA        | 1                |                      |
| Ad05A20931 | Aradu.A05  | 101483592 | 101483609 | TCTGACAATCATAACATGCAACA     | TGCTTGTTTCTTTATTTCTGTTT     | 1                |                      |
| Ad05A20933 | Aradu.A05  | 101504652 | 101504665 | CGTCCAGCATTTCTTCATT         | CTCGGAGATTACTTCAGCCG        | 1                |                      |
| Ad05A20935 | Aradu.A05  | 101507071 | 101507088 | AAGGGTCAATTTCCCACTCC        | AAGCAGAAGCAAGGTGGAGA        | 1                |                      |
| Ad05A20937 | Aradu.A05  | 101514378 | 101514389 | TCAACTCCACTCAATGCCAC        | TATTGTTGGCTTGGGCCTTA        | 1                |                      |
| Ad05A20941 | Aradu.A05  | 101537006 | 101537043 | ATGGCCATTATCTTTTCGGT        | ACGATTTTGGGAACCTTGTG        | 1                |                      |
| Ad05A21131 | Aradu.A05  | 102133670 | 102133777 | CGGAATGGAATTTGGCTCTA        | GCGCGACGGTATTGTACTTT        | 1                |                      |
| Ad05A22286 | Aradu.A05  | 105703457 | 105703600 | AAAATTCGAACTTCCGATACTGA     | AAACTAATAAAACGCACTCTCGC     | 1                |                      |
| Ad05A22322 | Aradu.A05  | 105752345 | 105752469 | CGTGCAGAAACGAAAGAAAA        | TCCCACTCAAACGGTTCTTC        | 1                |                      |
| Ad05A23198 | Aradu.A05  | 107902859 | 107902943 | CACGCATTGCTTATGCTTTC        | CACCAGCACCACCATCAATA        | 1                |                      |
| Ad05A23286 | Aradu.A05  | 108099687 | 108099783 | CGTTTCTGTGTTTCAAAGCG        | TTTCTCCTCATCTTCTGCTGC       | 1                |                      |
| Ad06A96    | Aradu.A06  | 308951    | 309032    | CGGTATTGGTGGTTATTCCG        | AACAACACCGGTGCCAGTA         | 1                |                      |
| Ad06A384   | Aradu.A06  | 999235    | 999318    | ACTGCCGTTACCAACACCTC        | TGAATCGATAACGATAACAATGA     | 1                |                      |
| Ad06A656   | Aradu.A06  | 1720345   | 1720459   | TCTGAAAAGTCCGCCAAATC        | ATGGTGGAGAATAAGGCACG        | 1                |                      |
| Ad06A1523  | Aradu.A06  | 4283297   | 4283393   | CGCGCATTAACTCATTTTGA        | GAGGAAGAAGAACGTGCAGC        | 1                |                      |
| Ad06A2118  | Aradu.A06  | 6090935   | 6091106   | TATGTTGGGCATTTTGGGTT        | GAGGAGCCTTTGAAGGAAAGA       | 1                |                      |
| Ad06A2553  | Aradu.A06  | 7397403   | 7397482   | TGATCCTATCCCCAACAAACA       | ATCCGGTTTTGACGTAATGG        | 1                |                      |

| ID         | Chromosome | SSR_start | SSR_end   | FORWARD PRIMER (5'-3')  | REVERSE PRIMER (5'-3')   | Bands in parents | Polymorphism in RILs |
|------------|------------|-----------|-----------|-------------------------|--------------------------|------------------|----------------------|
| Ad06A2830  | Aradu.A06  | 8263616   | 8263717   | ACCAGGAGTACATGCAAGGC    | TGAAGGCAAAAGTTAAGGGG     | 1                |                      |
| Ad06A3468  | Aradu.A06  | 9968367   | 9968478   | GAGGAAAAGAACGTGCAGC     | AAACGCGATGCAAGGTTTAC     | 1                |                      |
| Ad06A3852  | Aradu.A06  | 11089077  | 11089182  | CTGGCTCCGAGGAGAGTATG    | ACTCCATAACCCCGTTCTC      | 1                |                      |
| Ad06A3979  | Aradu.A06  | 11414505  | 11414662  | GAGCTTGGATTTGTGGGTTT    | GCTTCACTCTTCATGTTCTTCG   | 1                |                      |
| Ad06A4135  | Aradu.A06  | 11915833  | 11915964  | TTCTGGTGATTTTGATGAAGGA  | TACACGCGCTATATTCACGC     | 1                |                      |
| Ad06A4196  | Aradu.A06  | 12101070  | 12101181  | CCCAATATAAAGGCCAGGT     | AAAACTCCGTTTGCTGAACA     | 2                | Yes                  |
| Ad06A4451  | Aradu.A06  | 12898974  | 12899109  | CGTGCAGAAACGAAAGAAAA    | AACGTAACACACGTGCCCC      | 1                |                      |
| Ad06A4890  | Aradu.A06  | 14778673  | 14778849  | GCTTCGAACCGTTCTTCTTC    | TGAAATCGAGAATAACAAAGAAA  | 1                |                      |
| Ad06A5393  | Aradu.A06  | 16534135  | 16534289  | CCCAGCATAAAACCAATTCAA   | TGTATGTATGCTGCTGTCTGAA   | 2                | Yes                  |
| Ad06A6447  | Aradu.A06  | 21364246  | 21364395  | TTTGATCCTTTTCCATTCTTT   | GGGGGATACCATTTGGGTAA     | 2                |                      |
| Ad06A7140  | Aradu.A06  | 26595256  | 26595352  | CCTACCCCTTCTTCTCCAC     | CTAGAGTTTCTCCGGCCTT      | 1                |                      |
| Ad06A7676  | Aradu.A06  | 30867684  | 30867789  | CACGCGTCCCTTCTATTTA     | GAGCGGAGGTGGTGGTTAT      | 2                |                      |
| Ad06A7821  | Aradu.A06  | 32246619  | 32246699  | TTGGTTTGAGAATTAGGCATTGT | TTCATGCATCCCAAATTCAA     | 1                |                      |
| Ad06A7936  | Aradu.A06  | 33013262  | 33013377  | CAGCACTAGCTTGTCCGAGA    | CCCTCTGAGAACCACACACC     | 1                |                      |
| Ad06A8185  | Aradu.A06  | 35337353  | 35337476  | CCTCATGCTCTACAGGAACGA   | TCGCAGGCTTAGATAGGAGC     | 1                |                      |
| Ad06A9949  | Aradu.A06  | 54045073  | 54045204  | CTCATCACCACCGTTGACAC    | TCATTTCTCCTCCCTCCTC      | 1                |                      |
| Ad06A10214 | Aradu.A06  | 56350866  | 56350949  | GGAGAAAATGGGGGAGAGAG    | GCTCCAGGTGGAGACTTGAT     | 1                |                      |
| Ad06A10649 | Aradu.A06  | 60452381  | 60452480  | CCTTTTCAATCAAAGCACGA    | TGCCTTTATTTTGGTTGATGC    | 2                | Yes                  |
| Ad06A10668 | Aradu.A06  | 60685560  | 60685697  | TGCTTTGACCACACCAAACCT   | ACACACTACCCCTCTCCCT      | 1                |                      |
| Ad06A11725 | Aradu.A06  | 69462950  | 69463079  | TGTGAGTACTCCAACAGGCTAGG | TGGAAAGGAAAAGCGAAGA      | 1                |                      |
| Ad06A11924 | Aradu.A06  | 70849086  | 70849207  | TCACCAAAGATTCTGTGACAT   | CCTCCCCTTCTTCTCATTTG     | 2                |                      |
| Ad06A12584 | Aradu.A06  | 76264355  | 76264532  | AAACATACCCTCGAAAATTCG   | TCACCTTATGTGGTAAAAATGTGC | 2                |                      |
| Ad06A13507 | Aradu.A06  | 82424464  | 82424547  | TCCCAATTAGAGGTGTCCA     | GGCTCTTGAAAGAATGAGGG     | 1                |                      |
| Ad06A13701 | Aradu.A06  | 83382918  | 83383058  | GCCGCTACTGCTGAGAGATAA   | GCACACATGGAGGGAGAGTT     | 1                |                      |
| Ad06A14432 | Aradu.A06  | 87141029  | 87141143  | TGTCGGAATTTTTCGATGGT    | AGATGTTGCAGTGGTGGTCA     | 1                |                      |
| Ad06A14770 | Aradu.A06  | 88762128  | 88762228  | TGATTTGCGTTTTGAACAGG    | CGTACGTTGAGTCTCACTCA     | 2                |                      |
| Ad06A15098 | Aradu.A06  | 90261859  | 90261947  | ATTTCCCTCCAAAAGCCAAT    | CTCCAACCACTCACTCCGTT     | 1                |                      |
| Ad06A16982 | Aradu.A06  | 98497851  | 98497939  | GGAACCTCGAGTTGGTGACT    | ATCCTTCTGAGTGTGCG        | 2                | Yes                  |
| Ad06A17247 | Aradu.A06  | 99455061  | 99455198  | TCTGAATTGAAAATTTCTGCATC | AAATGGTGGCTTGCAATACG     | 2                | Yes                  |
| Ad06A17637 | Aradu.A06  | 100886483 | 100886653 | TTCTGCTGCTTCTTCTTCTCA   | CTCAAATGCGCTTCAAACC      | 1                |                      |
| Ad06A18300 | Aradu.A06  | 103006436 | 103006516 | TCCCAACGTTGTATTTGGT     | CTTCACTCTCTCCCCTTCC      | 1                |                      |
| Ad06A18417 | Aradu.A06  | 103390478 | 103390566 | GGCCTAACTCCACAAGCTG     | CTTAAGTTTTATTGCGCCG      | 1                |                      |
| Ad06A19035 | Aradu.A06  | 105118254 | 105118334 | CATCCATTGCTATCAACCC     | GGGAATATCAATTTAGGAATGG   | 1                |                      |

| ID         | Chromosome | SSR_start | SSR_end   | FORWARD PRIMER (5'-3')     | REVERSE PRIMER (5'-3')      | Bands in parents | Polymorphism in RILs |
|------------|------------|-----------|-----------|----------------------------|-----------------------------|------------------|----------------------|
| Ad06A20472 | Aradu.A06  | 108679224 | 108679364 | GGGGGTATGGCTAGAAATTGA      | TGAGTTTGTGAGTGAGTGAGTGAG    | 1                |                      |
| Ad06A20587 | Aradu.A06  | 108927575 | 108927734 | GAAGGAGAAAGAGAAGGCAAGA     | TTTTTCTTTTTCCGTGCCTC        | 1                |                      |
| Ad06A21007 | Aradu.A06  | 109779119 | 109779206 | TCAGCTAGCCCTCGCTTACT       | TGCTTGCCCTTTTACCATTT        | 1                |                      |
| Ad06A21851 | Aradu.A06  | 111639669 | 111639786 | TGTTAGGTTCCGAGCTTTGC       | AAAATTTGATTGAGAAATAAACTCCA  | 0                |                      |
| Ad07A14    | Aradu.A07  | 67161     | 67184     | CCTTTATAAACACTAGCACCTGGA   | GGCTCATTGGCAAGCAGTAT        | 1                |                      |
| Ad07A16    | Aradu.A07  | 68861     | 68875     | TACCATTTTTCTCTGGGGGAA      | GCATCTCACATAGAAGGGGAA       | 2                |                      |
| Ad07A17    | Aradu.A07  | 76015     | 76053     | ATTTACAGGGGAGGGGAAGT       | GGCTAGGTGTGACTGAGAACC       | 2                |                      |
| Ad07A19    | Aradu.A07  | 85129     | 85156     | TTCCTCCTTAATTTTTGTTTGTGTTG | TGGTAAGTTCGCAATAAAGATTGA    | 0                |                      |
| Ad07A28    | Aradu.A07  | 97016     | 97048     | TAGCTACGTCCGTGTCGTTG       | TAGGACGACGACGATGATGA        | 1                |                      |
| Ad07A32    | Aradu.A07  | 106282    | 106386    | AAAGGGAAAGCCCAGAAAAA       | TGTGTTGGCGAAACAAGAAA        | 1                |                      |
| Ad07A36    | Aradu.A07  | 153452    | 153471    | CACACACTTTCACCCCTCCCT      | TTCTGCCTAGCACCCATTCT        | 1                |                      |
| Ad07A53    | Aradu.A07  | 251568    | 251609    | TGCACCGAATACAATGGAGA       | TCGTTCTTAAAGTGAGCGGC        | 1                |                      |
| Ad07A55    | Aradu.A07  | 255271    | 255285    | ATGGGAGTTGCTTTTTGGTG       | CGTCACTAGCTTGACGGTTG        | 1                |                      |
| Ad07A57    | Aradu.A07  | 269375    | 269395    | CTGGCTCAGAAAGAAGTCGG       | TTCAGGAGGCTAAGGCAAGA        | 1                |                      |
| Ad07A63    | Aradu.A07  | 313709    | 313726    | AGAGGGTCCAGGAGGCTAAA       | ATCATCCATGCCTATACGGG        | 1                |                      |
| Ad07A64    | Aradu.A07  | 321907    | 321921    | TCTTGTGTCATAGCTGCTG        | CATGGCCACGATTAGACCTT        | 1                |                      |
| Ad07A69    | Aradu.A07  | 346625    | 346642    | TTTGTGGATGTGCTTTCTCG       | TACAATCAGCCACGCGATAC        | 1                |                      |
| Ad07A71    | Aradu.A07  | 348306    | 348332    | TCAGGCTCAAACCTCAAGGGT      | TGAATCCTACGTACCTCCGC        | 1                |                      |
| Ad07A78    | Aradu.A07  | 366825    | 366842    | TTCATGCACCATTTCTTGA        | ACCAGGTTCAATCCTTGTGC        | 1                |                      |
| Ad07A107   | Aradu.A07  | 464220    | 464237    | TGTTTAAAATTTTCGTAGTTCGC    | TTCCATTTCTGCTTTCACC         | 1                |                      |
| Ad07A108   | Aradu.A07  | 471440    | 471459    | TCGTTGTGTTTTTGTGCGAGC      | TACCAAACACGCGGATAATG        | 0                |                      |
| Ad07A115   | Aradu.A07  | 484248    | 484274    | CTTGCTTAGCTCCATCGCTT       | TGGCACATGACACATGAAAA        | 1                |                      |
| Ad07A120   | Aradu.A07  | 509201    | 509218    | TGCAAATGAAAAATTTCTGGA      | AACACACAAATAGATCTTCAAAGCA   | 0                |                      |
| Ad07A123   | Aradu.A07  | 511555    | 511569    | GAACCATTCCCATCCATGAC       | GAAAAGCAAGAGCACGTAGAAA      | 1                |                      |
| Ad07A133   | Aradu.A07  | 553466    | 553480    | TTTTGTCAACTCAAACCGTAATAA   | ATCACAAATATTGCTGGCCC        | 0                |                      |
| Ad07A141   | Aradu.A07  | 573950    | 573964    | AGAGGGAAGGGTGAAAGGAA       | TGCAAGTAGACTGGCTAGGGA       | 1                |                      |
| Ad07A150   | Aradu.A07  | 601944    | 601958    | TTTAAAGCACTGGAGGAAGATG     | TGTTTCGCTTTCTTTATTATTGC     | 1                |                      |
| Ad07A162   | Aradu.A07  | 646025    | 646039    | ACTGAGCAGGTAAGCCACA        | GGATTTGGCACTCAAAGCTC        | 1                |                      |
| Ad07A165   | Aradu.A07  | 647284    | 647319    | TTGCTTTAATAAACTGAATTGGA    | AACACTCAATCTGTCAATCATACATTT | 1                |                      |
| Ad07A167   | Aradu.A07  | 655534    | 655548    | TGAGACCCAAATCCAAAAGG       | TTGGTGCCATTGCTTTGTAA        | 1                |                      |
| Ad07A169   | Aradu.A07  | 657018    | 657032    | CAATGGGTAGAGCCTTGCTT       | TGAGGAAATTCGAAAAAGGAAA      | 1                |                      |
| Ad07A194   | Aradu.A07  | 900283    | 900297    | GAGACTTACGCCCTAGCCAA       | ACGACATTTGGGATCGCTAC        | 1                |                      |
| Ad07A201   | Aradu.A07  | 923304    | 923324    | AGCTAAGATTGTGCGATGCC       | TGGTATACGCGCTGTTATCG        | 1                |                      |

| ID       | Chromosome | SSR_start | SSR_end | FORWARD PRIMER (5'-3')     | REVERSE PRIMER (5'-3')    | Bands in parents | Polymorphism in RILs |
|----------|------------|-----------|---------|----------------------------|---------------------------|------------------|----------------------|
| Ad07A206 | Aradu.A07  | 934748    | 934762  | ACGCTTTGGCAGCACTCTAT       | TCTTTCCCCAACTTGCTCTT      | 1                |                      |
| Ad07A207 | Aradu.A07  | 935049    | 935072  | TGGGGACCCTAGATGGGTAT       | TCCCCTTCTTCTCTTTGTGG      | 1                |                      |
| Ad07A216 | Aradu.A07  | 949920    | 949934  | TCCCTAAAATTGAATGCGCT       | TGAGAGGATCCATTTCCAACA     | 1                |                      |
| Ad07A222 | Aradu.A07  | 960219    | 960233  | TTGCTGCCTTTTACCAAACC       | TCTAAACTAGGTCAAATAGCAGAGC | 1                |                      |
| Ad07A225 | Aradu.A07  | 969763    | 969777  | TGACCGTTTTTAAAGAAAACAAA    | TTAGGGTTTTGTGCAATGGA      | 1                |                      |
| Ad07A235 | Aradu.A07  | 996024    | 996038  | TGCAACTCAGTGACCAGACA       | AGCTAGCAGGGGTGTTGCTA      | 1                |                      |
| Ad07A241 | Aradu.A07  | 1007653   | 1007667 | TGCAACTCAGTGACCAGACA       | AGCTAGCAGGGGTGTTGCTA      | 1                |                      |
| Ad07A251 | Aradu.A07  | 1041849   | 1041902 | GTTGGGCCAGTTATTCAGA        | CATGTTCCAAATATCATGCCA     | 0                |                      |
| Ad07A259 | Aradu.A07  | 1064442   | 1064474 | ACCCGTCAAATCCACAAGTC       | AGGGATCAATATCCTTCGCA      | 0                |                      |
| Ad07A266 | Aradu.A07  | 1083980   | 1083994 | GATGACGATGATGCACCTTG       | CCAACAAGCATCACAGAGGA      | 1                |                      |
| Ad07A267 | Aradu.A07  | 1084200   | 1084217 | TCCTCTGTGATGCTTGTGG        | GTCATTGCCAAATGGGTAGG      | 0                |                      |
| Ad07A269 | Aradu.A07  | 1086324   | 1086362 | TTGGATATAGAATGGCAAGACAA    | TCGCGTTAATCTCAATGACG      | 1                |                      |
| Ad07A290 | Aradu.A07  | 1133680   | 1133694 | ATTCAAATGTTTGCCGGTGT       | CGTCTAATGTGGCAGTCAGG      | 1                |                      |
| Ad07A299 | Aradu.A07  | 1158604   | 1158618 | ACAGAGATTTGCGCTCCATT       | GGCCTTGTTAATTAGGGGGA      | 0                |                      |
| Ad07A300 | Aradu.A07  | 1159043   | 1159072 | TAGCCGGCACATTGATACAG       | TAACAACAACGCTGCAGGAG      | 1                |                      |
| Ad07A307 | Aradu.A07  | 1166573   | 1166690 | TCACTTAGAGATTGTAAGTTCGAGTC | AGTCACGTGCATCTGTCCAA      | 1                |                      |
| Ad07A313 | Aradu.A07  | 1191594   | 1191626 | AAAGTTCCTAGCCGTCCGAT       | CAAACACCCTGTATGCTTGG      | 1                |                      |
| Ad07A315 | Aradu.A07  | 1194040   | 1194054 | TTACAACCCGTGATGATGGA       | AAGTTGCCATTGATGCTTCC      | 1                |                      |
| Ad07A318 | Aradu.A07  | 1205818   | 1205835 | GAGAAGAAATCTTGTCGCCG       | GCCACACACTCACTCACACA      | 1                |                      |
| Ad07A335 | Aradu.A07  | 1240063   | 1240080 | TGAAAATGGCTCCTTCTGGA       | GGGCATGTTGAAATCTCTGG      | 1                |                      |
| Ad07A351 | Aradu.A07  | 1285507   | 1285521 | GCTGCTTACTTGAACCTCGG       | CAAGAATATTGGCCCCTTGA      | 2                |                      |
| Ad07A358 | Aradu.A07  | 1292248   | 1292277 | CGAATAAAAAGCGTCAAACG       | AATCACCACAAGAACCAGGC      | 1                |                      |
| Ad07A371 | Aradu.A07  | 1324882   | 1324896 | TGCCATCGCATGAGAATAAA       | CCATCATCGTCGTCATCATC      | 1                |                      |
| Ad07A374 | Aradu.A07  | 1333982   | 1333999 | GCCGTCAAGTAAATAGGACCC      | GCGAGAAATCCTCAATTCCA      | 1                |                      |
| Ad07A391 | Aradu.A07  | 1374616   | 1374635 | TTTCTTCCAACCACATGCAA       | TTGCATGCATGAGTTCCATT      | 1                |                      |
| Ad07A394 | Aradu.A07  | 1376431   | 1376448 | CAATTTAATGGCGCCAA          | AGGGTTCGAATTCGTCTTG       | 0                |                      |
| Ad07A395 | Aradu.A07  | 1376631   | 1376645 | CAAGACGAAATTCGAACCT        | GTATCTCTCAGGGGAGGGGA      | 0                |                      |
| Ad07A397 | Aradu.A07  | 1377521   | 1377535 | CTCAGGGGAGAGGAATGACA       | CACCTGCCAGTTGAGTCACA      | 1                |                      |
| Ad07A402 | Aradu.A07  | 1384642   | 1384730 | GCATGGCTAAGTGGTGGTTT       | TTGGGTCCCTATATAATTAAGTCAA | 0                |                      |
| Ad07A403 | Aradu.A07  | 1384865   | 1384942 | TGCAGAACTCAAATAAAAGAAAAA   | AAATAAGGAGGGGCCACACT      | 0                |                      |
| Ad07A418 | Aradu.A07  | 1444007   | 1444069 | CTTAAAGTTTTCCACGGCCA       | AATCTTGTCGTTTTGGCACA      | 0                |                      |
| Ad07A419 | Aradu.A07  | 1446949   | 1446966 | TGGAGAAGAAACGAAAGGGA       | CCCCAAGACCCAAAATAAT       | 1                |                      |
| Ad07A427 | Aradu.A07  | 1500143   | 1500157 | AAGCAAGCCCAATCAACATC       | AAAGGCAAAGAGAGAACGCA      | 1                |                      |



| ID       | Chromosome | SSR_start | SSR_end | FORWARD PRIMER (5'-3')      | REVERSE PRIMER (5'-3')       | Bands in parents | Polymorphism in RILs |
|----------|------------|-----------|---------|-----------------------------|------------------------------|------------------|----------------------|
| Ad07A429 | Aradu.A07  | 1505996   | 1506096 | TTGATTCATGTAGCCGACCC        | TGAAACCCGAAAGAGATGGT         | 1                |                      |
| Ad07A432 | Aradu.A07  | 1510697   | 1510819 | GATTTAGAACACCTGCGTCCA       | TTCTTCTTCTTCGCTCCTGC         | 1                |                      |
| Ad07A436 | Aradu.A07  | 1511891   | 1512020 | AAAGTGTTTGCTTTCATTATTATCA   | GAAAAAGTAAAATGATTATCCCAAAA   | 0                |                      |
| Ad07A437 | Aradu.A07  | 1512258   | 1512275 | GGCGTGATGAGGACAAAAAT        | CCCTCTCAACTCTCAAAAGATTGT     | 0                |                      |
| Ad07A482 | Aradu.A07  | 1619215   | 1619235 | GCCTTTGTTGCCTCTTCTTG        | CATCATCACTCCTCTTTACAACCA     | 1                |                      |
| Ad07A484 | Aradu.A07  | 1620427   | 1620458 | TTGGAGGCTTCTCTCTTTGC        | AAACTAATTTACCATCCACCC        | 2                |                      |
| Ad07A487 | Aradu.A07  | 1628528   | 1628554 | CGAAAGAACGAAGCGAAAAC        | CTTCTGGGTTTTGAGCAAGC         | 2                |                      |
| Ad07A491 | Aradu.A07  | 1643150   | 1643170 | ACCGCAACAGCAATACCAAT        | TTCAAGAGCTTCGGTTTTCGT        | 1                |                      |
| Ad07A492 | Aradu.A07  | 1644209   | 1644223 | TGGGAACAGAAAACAGAGGG        | GCTTTTTGGCCATGTTTGTT         | 1                |                      |
| Ad07A495 | Aradu.A07  | 1648874   | 1648888 | GAAGGTGGTCAAGGTCAAGG        | TTGGATCAAATTTGGAGTGGG        | 1                |                      |
| Ad07A497 | Aradu.A07  | 1649857   | 1649877 | TGCTAGTCATATCTGATTTTTGTTATC | GAAGCTCAGATCCAAGCCAG         | 0                |                      |
| Ad07A500 | Aradu.A07  | 1668886   | 1668933 | CAGCACATGTCGTTGCTTCT        | CTTTTTGGACCGCGAAATAA         | 1                |                      |
| Ad07A507 | Aradu.A07  | 1691549   | 1691581 | GATGAATCCCTTTGGAAGCA        | TCTCTTCCAAATTCGTTGGC         | 1                |                      |
| Ad07A508 | Aradu.A07  | 1691687   | 1691731 | AAACCGCCTTTTATTTCCGT        | ATGTTTTGGCTGATCCCTTG         | 1                |                      |
| Ad07A515 | Aradu.A07  | 1710389   | 1710403 | ACACCCAAAATTCGTTGAAG        | ACTGCACGTTTTCACTGCAC         | 1                |                      |
| Ad07A516 | Aradu.A07  | 1710524   | 1710538 | CCTCCTCATCTTCTGCTGCT        | ACTGCACGTTTTCACTGCAC         | 1                |                      |
| Ad07A517 | Aradu.A07  | 1710663   | 1710754 | AAACGTGCAGTAACGGTTGA        | CGCACGTTCTTCTTCCTCTT         | 1                |                      |
| Ad07A520 | Aradu.A07  | 1713552   | 1713569 | TCCCGTGATTTGATTTGTCA        | TGTTCCACCAGGCCACTAAT         | 1                |                      |
| Ad07A524 | Aradu.A07  | 1721119   | 1721147 | AAGACACCATTGCATTCATCA       | GGTCTTTGTTTTTGGGAAGGA        | 1                |                      |
| Ad07A529 | Aradu.A07  | 1734275   | 1734289 | ACCATTATACCCTCCTCCGC        | GTTGCCATTTTATTTGGCCT         | 1                |                      |
| Ad07A537 | Aradu.A07  | 1740782   | 1740802 | TGCCTCCCTTGAAAAGAAAA        | TGATCAATTTCTGAGTGAAGGAAA     | 1                |                      |
| Ad07A538 | Aradu.A07  | 1741002   | 1741133 | CCACAATGATCTGCTCAACAA       | TTTCTTCTTTGCAATGGGCT         | 1                |                      |
| Ad07A541 | Aradu.A07  | 1744332   | 1744385 | CCACATACTGTTACGGCACG        | TGAAGAAAGAGAAAGAGAAGGCA      | 1                |                      |
| Ad07A543 | Aradu.A07  | 1745212   | 1745403 | CGTGCAGAAACGAAAGAAAAG       | ACTCAAACGGTTCCTCTTCG         | 1                |                      |
| Ad07A544 | Aradu.A07  | 1746624   | 1746668 | AAAAATACGGCCCAATACCC        | TGAGTGTGTGTTGAAGTGTTC        | 1                |                      |
| Ad07A546 | Aradu.A07  | 1748628   | 1748642 | TCCAAACTCTCCTCACCCAC        | TGATCATGGGGTTGTTTCCT         | 1                |                      |
| Ad07A548 | Aradu.A07  | 1752562   | 1752608 | TTTTTCGCATATTCAAGGCA        | TGACTTTATTTTTGGTGTAAATGTCTCA | 1                |                      |
| Ad07A553 | Aradu.A07  | 1766891   | 1766908 | GCCTCTGCTTTCTGCTTCTG        | CAAAAATACCCTCCACGAGC         | 1                |                      |
| Ad07A554 | Aradu.A07  | 1769990   | 1770013 | AGGAAGCTAAGCCAAGTCC         | GTCGAGCCAAACTTGAGGAG         | 1                |                      |
| Ad07A571 | Aradu.A07  | 1813251   | 1813372 | TGAAGTGAAAGAGATAGGGGAAA     | GGCGTGCAAGAACAACCTAAT        | 1                |                      |
| Ad07A572 | Aradu.A07  | 1816274   | 1816303 | TCCCATCTCCCACGTACTC         | GCATGTTTGTCTTCTTCGCA         | 1                |                      |
| Ad07A579 | Aradu.A07  | 1875262   | 1875306 | TTCCATTAACCTTCTCGTACTTTTCC  | GGGGCAAATTTGGTAATATCC        | 1                |                      |
| Ad07A580 | Aradu.A07  | 1875890   | 1875919 | TTAGCACCAAAGCGTGTTCA        | CAGTGGCTTCCCTAGGATTTT        | 1                |                      |

| ID         | Chromosome | SSR_start | SSR_end  | FORWARD PRIMER (5'-3')    | REVERSE PRIMER (5'-3')       | Bands in parents | Polymorphism in RILs |
|------------|------------|-----------|----------|---------------------------|------------------------------|------------------|----------------------|
| Ad07A582   | Aradu.A07  | 1883995   | 1884009  | TCATTTATTTGGGATTGATTAGCTT | ACAACCGCTGAGGATGTTTC         | 1                |                      |
| Ad07A597   | Aradu.A07  | 1935548   | 1935625  | TGAAGTTGATAAATGAGAGCCG    | CACCACAAAATTAACACTATTACGATGA | 1                |                      |
| Ad07A602   | Aradu.A07  | 1941110   | 1941124  | CAGCAAAGCGTGTTCATCT       | TCTCCTCTATTTGCAATGCT         | 1                |                      |
| Ad07A603   | Aradu.A07  | 1942653   | 1942716  | GCGTGAGAAAATTAAGGAGTGA    | CAACCTCAACGTTAGGAACCA        | 1                |                      |
| Ad07A605   | Aradu.A07  | 1943106   | 1943202  | TTTTGTTACCGTCGTCACCA      | CAGAAACACCTGCATCTCCA         | 1                |                      |
| Ad07A606   | Aradu.A07  | 1943832   | 1943864  | TTTGGGTTTCATTCAATCGCT     | TTTACGCTGTGGGACTTTGTC        | 1                |                      |
| Ad07A607   | Aradu.A07  | 1944147   | 1944242  | TAGGTCACGCGTCTTTTTT       | GGAGGAGAATGAGGAGGAGG         | 1                |                      |
| Ad07A797   | Aradu.A07  | 2425045   | 2425145  | TTCGACATCGTTGTGAGAGC      | ATTCTGGTTGTAGCTTGGGC         | 1                |                      |
| Ad07A808   | Aradu.A07  | 2444517   | 2444675  | TTCGGTGACGTTCAACTCTG      | ATGCAACACCTTCCAAATCC         | 1                |                      |
| Ad07A926   | Aradu.A07  | 2663561   | 2663693  | TGTTTTGAGTTTTGGAGGGG      | AATTCAAACCCCGACACTT          | 0                |                      |
| Ad07A978   | Aradu.A07  | 2829348   | 2829515  | GGTGAGCTCTTGTTCGAGGA      | CATGGACACCTGAGGAGGAT         | 0                |                      |
| Ad07A1112  | Aradu.A07  | 3215858   | 3215993  | CAGCGATAAACCAACAGCAA      | TTCCCATTAATCCCTTCTGC         | 0                |                      |
| Ad07A1818  | Aradu.A07  | 4907309   | 4907414  | GGCATGTAGCACATTAAGTGAATC  | TGGACATCAAATTTGTTACATC       | 1                |                      |
| Ad07A1926  | Aradu.A07  | 5196305   | 5196424  | TGGTTGATGGTCTTCTGATTTT    | GAAGCCTAAGCCCAGAATCC         | 1                |                      |
| Ad07A2116  | Aradu.A07  | 5698696   | 5698805  | TGATCGATGTAGCTTCGCTG      | TGGAGCATCCAAAAGAGGAC         | 2                |                      |
| Ad07A2224  | Aradu.A07  | 5927722   | 5927871  | CCCCTGAATTCGCTACTATCC     | CTGCTTCGTTGAACCCTAGC         | 1                |                      |
| Ad07A2897  | Aradu.A07  | 8039995   | 8040079  | TAATGCCGTTGCAATCATTC      | CATGTACGCCGCTAAATCAA         | 1                |                      |
| Ad07A3267  | Aradu.A07  | 9166276   | 9166493  | TCATCAGTATTCACCACAAGTGC   | CAATGTTGAATCCACCACGA         | 1                |                      |
| Ad07A3763  | Aradu.A07  | 10690300  | 10690380 | GAACGCGACCAGAAGAGAAC      | CTGCTGCAACGTAAACCTCA         | 1                |                      |
| Ad07A4529  | Aradu.A07  | 13136577  | 13136681 | TCCCGATTCATCAACTCAA       | ACATGACAGAGCACAAATGGC        | 1                |                      |
| Ad07A4990  | Aradu.A07  | 14716640  | 14716745 | GACATGTACATTAAGACCAAATCG  | ATGGCGTGAAAAGCAAGTTC         | 2                | Yes                  |
| Ad07A5292  | Aradu.A07  | 15913792  | 15913888 | AACGAGAGAGAGCAACGAGC      | GTTTGCGATTCCCCTCTACA         | 1                |                      |
| Ad07A5319  | Aradu.A07  | 16008745  | 16008833 | TTCGTCTTAACGTCTTGGG       | GAGGGAGAAGTTGCAGGTTG         | 1                |                      |
| Ad07A5481  | Aradu.A07  | 16682319  | 16682437 | GTGTGATGGATGGTGATGGA      | CCCTTCTTCCCCAAAATCAT         | 1                |                      |
| Ad07A5666  | Aradu.A07  | 17279519  | 17279650 | AAAAAGAAGACAACGATAATGACAA | TGCACCAAAACTAAACGCAA         | 1                |                      |
| Ad07A6822  | Aradu.A07  | 23065419  | 23065504 | GCCTCTTCCACCAACTCAAC      | CACAACTTTCCGTGACCCTT         | 1                |                      |
| Ad07A7294  | Aradu.A07  | 24886314  | 24886393 | GAGGTCGTCATTTCTCTCG       | CGCATCACAATTTTCTCACG         | 2                |                      |
| Ad07A7483  | Aradu.A07  | 26237090  | 26237274 | AGAGAGAAAGAACAAGAAAAGAAA  | TCCTCCTCCTCTCTTCCC           | 2                |                      |
| Ad07A7854  | Aradu.A07  | 28173857  | 28173937 | GATAATGCTGAGGGCACGTT      | TAGAAGGATGGGGACACAA          | 0                |                      |
| Ad07A8335  | Aradu.A07  | 30796007  | 30796157 | TTTACAATCTGTACCAGAACTT    | TTTCCCACATTTTTATCC           | 0                |                      |
| Ad07A8878  | Aradu.A07  | 34916293  | 34916385 | CCAGGTGCAGTATTTTATGGC     | GAGTAAAGTGCAGCCATCGTT        | 0                |                      |
| Ad07A9745  | Aradu.A07  | 40477501  | 40477658 | GGATCGGGTCCGTAACATTAT     | CTCTCAAATCATCATCCAACA        | 2                | Yes                  |
| Ad07A10125 | Aradu.A07  | 43528148  | 43528234 | ATGATCAGGATTCGTGAGGC      | CAAAACAGCACAAATGAGGC         | 1                |                      |

| ID         | Chromosome | SSR_start | SSR_end  | FORWARD PRIMER (5'-3')     | REVERSE PRIMER (5'-3')  | Bands in parents | Polymorphism in RILs |
|------------|------------|-----------|----------|----------------------------|-------------------------|------------------|----------------------|
| Ad07A11249 | Aradu.A07  | 52304312  | 52304508 | GGGAGAACCTGATTCCAACA       | CATCTTCTGCTCCAACCTTCATC | 1                |                      |
| Ad07A11412 | Aradu.A07  | 53597871  | 53597960 | GCTTACGCATGGATGAGCTT       | ATAGGGAGCTCTTGGGCATT    | 1                |                      |
| Ad07A12825 | Aradu.A07  | 61786597  | 61786691 | TCCTTGAGGTGTCAGCAGAA       | CACTTTTTCACTTCCAATTTTCG | 1                |                      |
| Ad07A13140 | Aradu.A07  | 63825387  | 63825583 | TACCTTCTCCTTTCACCCC        | TGTTGCTGAAATTTGTTGTGG   | 1                |                      |
| Ad07A14672 | Aradu.A07  | 71109729  | 71109854 | TCCTTCATTTCTTTCTTTTTGTTTTT | GAATATTGCTTGACTTGCTTTCG | 0                |                      |
| Ad07A15154 | Aradu.A07  | 72380611  | 72380736 | TGCTGCTTATTTCGTTTCATGC     | TTTTGGACAAGAACCTCATCC   | 1                |                      |
| Ad07A15468 | Aradu.A07  | 73413555  | 73413688 | TTGCCATCTCACCTCTCTT        | AACGGAACCAAATGCAAAAG    | 1                |                      |
| Ad07A15701 | Aradu.A07  | 74262398  | 74262493 | TTGTTCTCTGCCTACCAGCA       | TCGATGGATTTAGCTAGGACG   | 1                |                      |
| Ad07A15861 | Aradu.A07  | 74819096  | 74819197 | TCTTCCCCAAAATCAAGCAC       | TTGCTTCTGGTTGTTTCTGCT   | 2                |                      |
| Ad08A811   | Aradu.A08  | 3184171   | 3184253  | CTGACTGCGATGCTGTTCAT       | AAGGATAGCGGATGGTGTTG    | 1                |                      |
| Ad08A1071  | Aradu.A08  | 4248950   | 4249046  | AAAAAACTTCCCCCTGCTT        | TTCTTCTTCTTACCGCCA      | 1                |                      |
| Ad08A1156  | Aradu.A08  | 4507083   | 4507184  | TGAACCAGAGAGAATGTGAAGG     | AACTTAAGCAAGTCCCTCCTG   | 1                |                      |
| Ad08A1796  | Aradu.A08  | 6988638   | 6988720  | TTACAGACCGACCCTCTTCG       | CGAAGAGAACCAGGCAACTC    | 1                |                      |
| Ad08A1820  | Aradu.A08  | 7079004   | 7079119  | GGTCGCAGGAATCACTACTGT      | TGTATGACTCGGTGGTGATGA   | 1                |                      |
| Ad08A2112  | Aradu.A08  | 7891486   | 7891569  | CAGGCTCACGAGGACAAACT       | CGTTCGGATGCACAATTTTA    | 1                |                      |
| Ad08A2362  | Aradu.A08  | 8712586   | 8712690  | TCCACAAAACCTAAGCCTCAA      | AACCCCAAACCCATTCAAGT    | 2                |                      |
| Ad08A2732  | Aradu.A08  | 9848313   | 9848441  | TGCTTCTTCACCAAAGAGAGAA     | GAAATACACGCGCCCAATAC    | 1                |                      |
| Ad08A3286  | Aradu.A08  | 11497472  | 11497576 | TCAGCAACAACAATCCTCCA       | CTCCTTCTTCTTCTTCCCGC    | 1                |                      |
| Ad08A3438  | Aradu.A08  | 11919864  | 11919947 | CGTGAAGAAGAAGGAACGTGA      | CGTCCAACACACACGAAATC    | 1                |                      |
| Ad08A3453  | Aradu.A08  | 11970935  | 11971018 | CGTGGATAAAGTCAATCACCA      | AGAGGGATCAAGTGTGGACG    | 2                | Yes                  |
| Ad08A3459  | Aradu.A08  | 11990406  | 11990513 | AAAGGATGGTTGGTTGGTTG       | CCTCCCTTCTTCCATTCCAT    | 1                |                      |
| Ad08A4387  | Aradu.A08  | 15003893  | 15004027 | CATGCCCATACATGAAATGC       | AAGCTGCGGCTTCAGTAATC    | 2                | Yes                  |
| Ad08A4940  | Aradu.A08  | 16589752  | 16589892 | TCCCTTCTTCTTCCACGA         | AGTGTGTGTCTGCGTTGGAG    | 2                | Yes                  |
| Ad08A5185  | Aradu.A08  | 17385245  | 17385340 | GCAGCACTCAACAAGGAACA       | TCCTGTCTGAGAGGGAGCAT    | 1                |                      |
| Ad08A6032  | Aradu.A08  | 21593818  | 21593937 | TCCTTTTCCGTTATTGCCTC       | GAAAGGGACGAATGAACCAA    | 1                |                      |
| Ad08A6126  | Aradu.A08  | 22643076  | 22643164 | TTGAATGCAAAAGCCTGATG       | GTGCATGGACTTCACGTTTG    | 1                |                      |
| Ad08A6679  | Aradu.A08  | 24548345  | 24548460 | ACATGACAGAGACAATGGC        | GGGTCATAGCCTCCCGTTAT    | 1                |                      |
| Ad08A7006  | Aradu.A08  | 25608666  | 25608829 | TTTCAGAGCTTGATGTCAAAAA     | GCTGCACGTTCTTCTTCCCTC   | 1                |                      |
| Ad08A7218  | Aradu.A08  | 26258248  | 26258350 | TGACACCAAGTCCAACCTCCA      | TCCTTAAGGTGAATTTTGCCA   | 1                |                      |
| Ad08A7227  | Aradu.A08  | 26265579  | 26265744 | CCTTACTTCTCCCTTCATCCC      | TTTCTGATGATGATGCCCTG    | 1                |                      |
| Ad08A8078  | Aradu.A08  | 28812263  | 28812355 | AGGAACGCTTTTGACGAGAA       | TGAGCATGATAGTAATCCGCAC  | 1                |                      |
| Ad08A8326  | Aradu.A08  | 29418097  | 29418222 | CGTTGTCCTGCACAATTCAA       | CAGTTCGAAAACAAGCACACA   | 1                |                      |
| Ad08A8579  | Aradu.A08  | 30059661  | 30059759 | TGGGAGTATGACAAAACATAAAAG   | TCCACGGTTATTTCGTTACCC   | 1                |                      |

| ID         | Chromosome | SSR_start | SSR_end  | FORWARD PRIMER (5'-3')    | REVERSE PRIMER (5'-3')     | Bands in parents | Polymorphism in RILs |
|------------|------------|-----------|----------|---------------------------|----------------------------|------------------|----------------------|
| Ad08A8871  | Aradu.A08  | 31065834  | 31065957 | CTGATGATGACGACGACGAT      | GCATCACACCAACCACAACACT     | 1                |                      |
| Ad08A9165  | Aradu.A08  | 31859118  | 31859209 | TTGCCTTTAGAAATTGGACGG     | CAAAAGAAGGTTTTGTCAGTCA     | 1                |                      |
| Ad08A10782 | Aradu.A08  | 36622804  | 36622946 | TCAATGGCCAATAACAATAAACTC  | CCGCAAATCATGCACTTTAG       | 1                |                      |
| Ad08A10918 | Aradu.A08  | 36978305  | 36978427 | CCCTTGCACCATCATAGTAGAG    | GCTGAGAGTGAGTGAGATTCCA     | 1                |                      |
| Ad08A12248 | Aradu.A08  | 40709572  | 40709672 | TGACACTATTTGGGTGTACCG     | CCCAAATTGCGTGCTTACAT       | 1                |                      |
| Ad08A12438 | Aradu.A08  | 41282047  | 41282136 | AGCGCTACACTCAGAACGGT      | TCAGAAACCATGAAAATCGAAA     | 1                |                      |
| Ad08A13210 | Aradu.A08  | 43528610  | 43528711 | GGGGTTCGAGTTGGTACTTCA     | GAGGAGGAGGAGAAAAGAGGAA     | 1                |                      |
| Ad08A13316 | Aradu.A08  | 43741970  | 43742088 | GGTGACGACGGTAACGAAAT      | TCCAAGTGATTTGAATTACGC      | 1                |                      |
| Ad08A13889 | Aradu.A08  | 45251884  | 45251980 | GGCCAAATTAACACTCATTGG     | CGCTGTTTCGTGTGGTTCTTA      | 1                |                      |
| Ad08A14487 | Aradu.A08  | 46666959  | 46667080 | TCGAAATAGAAAACAAAATAGCACG | TATTTATTTGCACGTCACCC       | 1                |                      |
| Ad08A14984 | Aradu.A08  | 47748305  | 47748433 | ACATGACAGAGCACAATGGC      | AAAAATGATCTAAACCTATCACACCC | 1                |                      |
| Ad08A15328 | Aradu.A08  | 48352183  | 48352265 | TCCGTTTAACCGAACGAAAC      | CCCCGTGACTCACACATACA       | 1                |                      |
| Ad08A15421 | Aradu.A08  | 48524382  | 48524490 | CAACTCCACCATGGATTCTCT     | CAACAACAAAGTCTTGTCCCA      | 1                |                      |
| Ad09A239   | Aradu.A09  | 620135    | 620301   | GCATGCCCGTTATCATCATT      | CTTTGAAATGTGGTGGATGCT      | 1                |                      |
| Ad09A1202  | Aradu.A09  | 2737299   | 2737499  | TGACTCCACCTACGCACAAG      | GCGCGACGGTATTGTACTTT       | 2                |                      |
| Ad09A1309  | Aradu.A09  | 3002896   | 3003030  | AATGCAAAAATTGAAGCAAAA     | TCATGACCACTCATGCCTTT       | 1                |                      |
| Ad09A1515  | Aradu.A09  | 3496158   | 3496298  | CAATGGGTTGGTGACCGTAT      | TTCTCTGTTGGTAAATGATTATCTCA | 1                |                      |
| Ad09A1716  | Aradu.A09  | 4114902   | 4114982  | TAACCACCTAAGCACAGGGC      | CACGTTACCCCAACCAGAGT       | 1                |                      |
| Ad09A2251  | Aradu.A09  | 5767850   | 5767957  | AAATGTGAAATACACGCGCC      | CCTTCTGCTGCTTCTTACC        | 1                |                      |
| Ad09A2638  | Aradu.A09  | 7040191   | 7040344  | TGGTGATGACGATAACGGAA      | CTCCTTCTCCTCCTCCTCGT       | 1                |                      |
| Ad09A3077  | Aradu.A09  | 8202950   | 8203084  | TGAAAAAGTGAAAAGGGAGCA     | CTATTTGGAGAGGTGGGCCT       | 1                |                      |
| Ad09A3779  | Aradu.A09  | 10766109  | 10766221 | TATCAACCGTTAACCGGAGC      | TGGCATGGAACCTAGAGTGA       | 2                | Yes                  |
| Ad09A3850  | Aradu.A09  | 11087170  | 11087308 | CAGTGCACCACCCTTTCATT      | ATATCACATAGCCATCGGGG       | 1                |                      |
| Ad09A4409  | Aradu.A09  | 12939523  | 12939610 | TTCCATGTGTTGCAGGAGAG      | ACACAGGCAACTCCTCCCTA       | 1                |                      |
| Ad09A4517  | Aradu.A09  | 13191823  | 13192038 | CTCCTTTGTTATCCCCCTCA      | AAGGAAAGAAAAGAGAGAGGAGC    | 1                |                      |
| Ad09A4697  | Aradu.A09  | 13912632  | 13912725 | ACCTACCCAGCCCTCTCATT      | CCACCTCCTCTATCATCGGT       | 1                |                      |
| Ad09A5968  | Aradu.A09  | 19633655  | 19633694 | CGGACTAGCAGAGAGTTGGG      | TCGTTCACTTTTGTGTGTTGG      | 1                |                      |
| Ad09A5971  | Aradu.A09  | 19654010  | 19654055 | CGGACTAGCAGAGAGTTGGG      | CACATCACAAGCAACGTTCA       | 1                |                      |
| Ad09A5979  | Aradu.A09  | 19680607  | 19680636 | GGAGAAAGAGGGAAAAGGAAAA    | CTCCCCCTCTCCCCACTCT        | 2                | Yes                  |
| Ad09A5985  | Aradu.A09  | 19695540  | 19695571 | CCACAATGGCAAAATTACCC      | GAAAGCTTCGCAGAACCAAC       | 2                |                      |
| Ad09A5990  | Aradu.A09  | 19741858  | 19741875 | AGGGTTTAATGCTGGTCAATG     | CCCAAATTTCTTGGGCTTTT       | 1                |                      |
| Ad09A5998  | Aradu.A09  | 19767710  | 19767751 | ATGCCATGCTTCTTTCACCT      | CATCCCAGCACGAAAGAGTT       | 1                |                      |
| Ad09A6009  | Aradu.A09  | 19796659  | 19796706 | ACGATGATGTGCGAACAATG      | CAGGATCTTCAATACGAAGCAA     | 2                | Yes                  |

| ID        | Chromosome | SSR_start | SSR_end  | FORWARD PRIMER (5'-3')      | REVERSE PRIMER (5'-3')    | Bands in parents | Polymorphism in RILs |
|-----------|------------|-----------|----------|-----------------------------|---------------------------|------------------|----------------------|
| Ad09A6014 | Aradu.A09  | 19811640  | 19811660 | TCTTTTTGTTACCGTTGGGC        | GAGGCATAGCAGAGCAAAGG      | 1                |                      |
| Ad09A6026 | Aradu.A09  | 19863205  | 19863218 | ATTCAAAACCGTGGCAAGAC        | TTTTCAAATGAGTTGCACACATAA  | 1                |                      |
| Ad09A6037 | Aradu.A09  | 19896695  | 19896724 | CTTGCCTATAAATCCGCCAA        | TAGATCTACATGCGCAACGC      | 1                |                      |
| Ad09A6046 | Aradu.A09  | 19934724  | 19934738 | TTGGTTTACTTTTCCGTGCC        | TGCTTAATGCTGCACGCTAC      | 1                |                      |
| Ad09A6050 | Aradu.A09  | 19981986  | 19982003 | GGGTGTTCTACAAAATGCAGC       | GGCCAAGCCTTCTTCAGTAA      | 1                |                      |
| Ad09A6058 | Aradu.A09  | 20012896  | 20012925 | TCGCTCTTGCCTGTAGTAGTTT      | GGTTGTGGGTTTCGAGTCTCA     | 2                |                      |
| Ad09A6069 | Aradu.A09  | 20047838  | 20047861 | CGTTCACACACAACAAAGG         | CCATTGTGCGACTGCCTCTTT     | 1                |                      |
| Ad09A6072 | Aradu.A09  | 20052807  | 20052834 | GGGTCAAGTTCTGAAACCA         | TTTTGTCTGAAGGTGTTTCTTGA   | 2                | Yes                  |
| Ad09A6083 | Aradu.A09  | 20115210  | 20115227 | GCGTCTGGAGTTTCCTATGC        | ACTCGACCTGCGAAGCTAAG      | 1                |                      |
| Ad09A6095 | Aradu.A09  | 20184597  | 20184636 | CATTTTAAAAAGTATGCGTACAAAAAG | CGATCCATAAGCATCATATCGT    | 1                |                      |
| Ad09A6105 | Aradu.A09  | 20207343  | 20207374 | AGGGCTGCTTTGAGAAGGTT        | GTGGGCTCCTACTCATTGGA      | 1                |                      |
| Ad09A6114 | Aradu.A09  | 20258806  | 20258826 | AGCATGTACGCACACGTTTC        | TGCGAAGAAGAAGAAGGAGAA     | 1                |                      |
| Ad09A6128 | Aradu.A09  | 20318641  | 20318652 | TTGGGCTATTTTTGACCCAG        | TGAGTAAAGAAACATTGAACCTGAA | 1                |                      |
| Ad09A6146 | Aradu.A09  | 20357297  | 20357311 | ATGTTCCCACACCCACAAGT        | CGCAGTTGTGATGCGTTAGT      | 1                |                      |
| Ad09A6154 | Aradu.A09  | 20424204  | 20424219 | ATGCTTGATGATGGTTGGGA        | CAAACATCAACACCCACCAC      | 2                | Yes                  |
| Ad09A6158 | Aradu.A09  | 20440376  | 20440395 | TCCCCTCCTAATAAAAATTTTTGC    | CAGCCGAAGGCTAGAGAGAA      | 1                |                      |
| Ad09A6164 | Aradu.A09  | 20474979  | 20474990 | GCAGAATTTGCCCTAGTGA         | GGAACATTGAAACTGAAATTGAGA  | 1                |                      |
| Ad09A6171 | Aradu.A09  | 20515632  | 20515671 | TTTGCAGCATTATGTGTTTCTTC     | TTTTCGGTGTATGTGTGCTGA     | 1                |                      |
| Ad09A6183 | Aradu.A09  | 20551676  | 20551695 | TTTTCGAACAATACGCAAATC       | TGTGTTATCGCCGAAAATGA      | 1                |                      |
| Ad09A6200 | Aradu.A09  | 20645025  | 20645042 | CAAGTTTGGTGTATGGGGG         | AATAAGCAAGTGCCTGCTGC      | 2                |                      |
| Ad09A6209 | Aradu.A09  | 20669115  | 20669130 | GAATGTCCAACTCGAGGGA         | AATGCGTCTTGGGAATTTGT      | 1                |                      |
| Ad09A6224 | Aradu.A09  | 20750736  | 20750777 | TCACGAAAAACATACAGTACCACC    | AAACTCCTGCACGACAATTTTT    | 2                |                      |
| Ad09A6233 | Aradu.A09  | 20785957  | 20785968 | AAGATGCGAGGGGTTGTATG        | ATTGCAATGTTGACTGACG       | 2                | Yes                  |
| Ad09A6250 | Aradu.A09  | 20840916  | 20840972 | TGCATTCAGTGTTAAAAGAAATCA    | CATTGAGCAAACCAAACCTCAA    | 1                |                      |
| Ad09A6258 | Aradu.A09  | 20862656  | 20862688 | AGAGGGAGGAAGATGTGGTG        | AGTCTTGAATCGCTTTCCGA      | 1                |                      |
| Ad09A6265 | Aradu.A09  | 20892616  | 20892651 | GGCTCGCTGATGAAGATAGG        | GGCGAGGCACTAAGGTATCA      | 1                |                      |
| Ad09A6270 | Aradu.A09  | 20910230  | 20910262 | CATGAGGTGGTCAAACGAGA        | AAATGTCACATGGTTGCTGC      | 1                |                      |
| Ad09A6278 | Aradu.A09  | 20924771  | 20924889 | TCCCCTTCTCACACTCTCTCA       | GCAGTCTGCAGGTGCTTTTT      | 1                |                      |
| Ad09A6287 | Aradu.A09  | 20946658  | 20946720 | CGCTATCCTGAGGAGGACAC        | GGACATTTACAACGACCCTGA     | 1                |                      |
| Ad09A6297 | Aradu.A09  | 20968814  | 20968829 | CATCTCCATCATTCCGCTT         | TTATAAAATCCGCGTGAGGC      | 0                |                      |
| Ad09A6306 | Aradu.A09  | 20991898  | 20991915 | TCGTCTCAAACCTTTCTTTTGATTT   | AAAAAGAATTTGCGCATAAAATA   | 1                |                      |
| Ad09A6323 | Aradu.A09  | 21039589  | 21039604 | TTAACACCAAATCCTAAACACTCA    | TTTCTGTTCCAAATCCTGGG      | 0                |                      |
| Ad09A6333 | Aradu.A09  | 21082209  | 21082283 | TGTTGCATTTATGACAGCCA        | CAAAAATGATCGTGAACCACA     | 1                |                      |

| ID        | Chromosome | SSR_start | SSR_end  | FORWARD PRIMER (5'-3')      | REVERSE PRIMER (5'-3')     | Bands in parents | Polymorphism in RILs |
|-----------|------------|-----------|----------|-----------------------------|----------------------------|------------------|----------------------|
| Ad09A6338 | Aradu.A09  | 21095181  | 21095207 | TGGACGAAAATACCCTTCTCC       | TTCTTGTTCACTTGGGCTT        | 1                |                      |
| Ad09A6343 | Aradu.A09  | 21098562  | 21098579 | CTTTCGATCCAGTGGGAAAA        | TTTTATGAAACCTCAATGCAAAAA   | 1                |                      |
| Ad09A6351 | Aradu.A09  | 21108054  | 21108083 | ACCACATCCTTGACCACTCC        | GGGACCAACTCGAACTGAAA       | 2                |                      |
| Ad09A6355 | Aradu.A09  | 21134975  | 21134996 | TTGCCATTGCTTGAGAGTTG        | CACCCAATTTTGCAAAGGAT       | 1                |                      |
| Ad09A6363 | Aradu.A09  | 21169082  | 21169114 | GCACCCACTCCTGATCCTAA        | AAACTTCTTAGTGCAAACCAACC    | 1                |                      |
| Ad09A6371 | Aradu.A09  | 21193566  | 21193593 | TTTTCCCTCGCCATTTATTG        | TTAGCACCTCATGATCGCAC       | 1                |                      |
| Ad09A6379 | Aradu.A09  | 21215385  | 21215447 | TGCTCTTATTGGTCAAGGATTTT     | AGGCTTATGCCTGTTCCAAT       | 1                |                      |
| Ad09A6395 | Aradu.A09  | 21265305  | 21265338 | ATCCCTGGTGCTGGTTAGTG        | ACTTGCTTGGCCAACACTCT       | 1                |                      |
| Ad09A6407 | Aradu.A09  | 21300978  | 21300989 | TTCCATCCACTTGGCTTCTC        | TGTTGGAATTGGTGTGGGT        | 2                |                      |
| Ad09A6411 | Aradu.A09  | 21319286  | 21319305 | TCCATCCAACACTTCCACAA        | TCCCCATACCCTTGTGATTC       | 1                |                      |
| Ad09A6416 | Aradu.A09  | 21382945  | 21382998 | GCTAGCCAAGTCAAGTGAGC        | TTGCAAGCAGCAAACAAATC       | 1                |                      |
| Ad09A6420 | Aradu.A09  | 21419608  | 21419625 | GTAGTCACTCGGCCACACCT        | AAGACCAAATCCAAGGCTCA       | 1                |                      |
| Ad09A6425 | Aradu.A09  | 21472232  | 21472324 | TTGGGTGCCTTGAATTGTAA        | TATAACCCCACTGACCGAG        | 2                | Yes                  |
| Ad09A6431 | Aradu.A09  | 21505097  | 21505114 | CACGCAGGTTCTTCTTCTCC        | TCGGTGATGACGATAACGAA       | 0                |                      |
| Ad09A6444 | Aradu.A09  | 21540874  | 21540887 | AATCAAGAAAGGGAAGAGGGA       | CGCCGTAAATCAACGGTAA        | 1                |                      |
| Ad09A6451 | Aradu.A09  | 21585064  | 21585084 | CCCTGCAGCTTTATTTGCTT        | TCATCTCCTGTTTGGTCCTTC      | 1                |                      |
| Ad09A6458 | Aradu.A09  | 21606313  | 21606333 | TGATTTTCTTATACTTTGAAATTTTGC | TTGAAAAACAAAACACACTCTCG    | 1                |                      |
| Ad09A6463 | Aradu.A09  | 21618354  | 21618429 | CAATACAATGCCATCACACCA       | CATGTAAGTGACGATTTGCCA      | 1                |                      |
| Ad09A6470 | Aradu.A09  | 21631549  | 21631584 | GGAGAAGAGGGGGAGAGAAA        | TCGTTGACAGAGATTCGACG       | 1                |                      |
| Ad09A6477 | Aradu.A09  | 21656683  | 21656696 | AGTGCTTGGTGGGAGACAAC        | ATTTTCTCCCCTCTCCTTGC       | 1                |                      |
| Ad09A6492 | Aradu.A09  | 21709342  | 21709367 | CACATATGGGAATAAGCCGC        | AAAAGATGCTCACGCATCAA       | 0                |                      |
| Ad09A6499 | Aradu.A09  | 21770206  | 21770220 | AAGGAGTTTTTGTCTCGGAGAATTT   | CTGCAGCGGAATTTTGACTT       | 1                |                      |
| Ad09A6503 | Aradu.A09  | 21782393  | 21782404 | TCGTTGTTTTGAATAAAGAGAGAAAA  | GAACAATTCAAAGCGGTCGT       | 1                |                      |
| Ad09A6509 | Aradu.A09  | 21819798  | 21819819 | AGTGTGGCCTTTTGTCTCTCA       | TGAAAGACGATGTATGGTTGATG    | 1                |                      |
| Ad09A6514 | Aradu.A09  | 21839408  | 21839440 | AGCCCCTTTTCTTTTTTCAA        | ATGTGCATGTCACCACCACT       | 1                |                      |
| Ad09A6528 | Aradu.A09  | 21877452  | 21877472 | CGACATAACAATCTCCCTCCA       | TGGTTTCAACCTTGTGTTTCTTG    | 1                |                      |
| Ad09A6530 | Aradu.A09  | 21878024  | 21878039 | TTGTCAACAAGAATCCGACAA       | TTTTTCCGTGTATCCCATTCA      | 1                |                      |
| Ad09A6539 | Aradu.A09  | 21892445  | 21892458 | TGAGTTGGTTGATTATTGCTGC      | GGAGCACGATAGACCTCCAG       | 1                |                      |
| Ad09A6547 | Aradu.A09  | 21932063  | 21932082 | CATTTTTCGAATTAGATTCGTGTCA   | TGATAAGTGAAATGATAAGAGAGGGA | 1                |                      |
| Ad09A6551 | Aradu.A09  | 21942070  | 21942081 | ACAAGCAGGCAATTGATGAC        | GGGAGATGGAGTCATGGAGA       | 1                |                      |
| Ad09A6562 | Aradu.A09  | 21974050  | 21974061 | GAGTCTTCGCTTCGTACGCT        | GCTTGAATGGAAGATGACTGAA     | 1                |                      |
| Ad09A6578 | Aradu.A09  | 22051236  | 22051274 | AACACAGCAGACTTGACCA         | GGATCAGAGCGATCATGTCA       | 1                |                      |
| Ad09A6584 | Aradu.A09  | 22097325  | 22097338 | TGGGTACACATGGAGAATGC        | TTTGGTCCGAAGGACAATTT       | 1                |                      |

| ID        | Chromosome | SSR_start | SSR_end  | FORWARD PRIMER (5'-3')     | REVERSE PRIMER (5'-3')      | Bands in parents | Polymorphism in RILs |
|-----------|------------|-----------|----------|----------------------------|-----------------------------|------------------|----------------------|
| Ad09A6587 | Aradu.A09  | 22106125  | 22106180 | GCGAGAGATGAAGGGAGAGA       | CCTCTTATTTGCTCATCCCCG       | 1                |                      |
| Ad09A6594 | Aradu.A09  | 22157062  | 22157083 | TTCCATGAGAAAGGAGACGG       | CGACGACAGAGTTGTGGAAA        | 2                | Yes                  |
| Ad09A6617 | Aradu.A09  | 22289637  | 22289662 | TCTTCTTCTCTTCCCCCAT        | AGAGAGAGACTGGCTGGCTG        | 2                | Yes                  |
| Ad09A6624 | Aradu.A09  | 22323816  | 22323829 | TTGTTGGCTCTTGAAAGAATGA     | AGGCCCTCCTATCCACTGAT        | 1                |                      |
| Ad09A6630 | Aradu.A09  | 22355713  | 22355728 | CACACACACACAGTCACCCA       | ATGGATGACGGAAACTCAGG        | 1                |                      |
| Ad09A6639 | Aradu.A09  | 22384597  | 22384608 | TCCAGCCCCAGAAAACATAG       | GCCAGTTTGGAAACATAAATCA      | 1                |                      |
| Ad09A6642 | Aradu.A09  | 22399906  | 22399921 | AAAGTGGGGAAATCCATTCA       | CATAAGCCAGTTTGGCAACA        | 1                |                      |
| Ad09A6655 | Aradu.A09  | 22436924  | 22436977 | AGGAGGCACGATAGTCCACA       | CAAAGAATTATTAGGCTTCGGA      | 1                |                      |
| Ad09A6669 | Aradu.A09  | 22459059  | 22459076 | TCTCAAGCTTCATAACGTCCAA     | AATCAAGTTTGTTCCCGCAC        | 1                |                      |
| Ad09A6680 | Aradu.A09  | 22547808  | 22547825 | GGGTGGAATGTAAGACCCAG       | CAAATTGCTATACTATTTTCACTCACA | 2                | Yes                  |
| Ad09A6690 | Aradu.A09  | 22589655  | 22589674 | TCCTGCCTCTCCATACACCT       | GGGCATTCCCAGGAACTTAT        | 1                |                      |
| Ad09A6707 | Aradu.A09  | 22703347  | 22703358 | GGGCGCAGAAGTTATGAAGA       | TTAAATCGCAAATCGCTCC         | 1                |                      |
| Ad09A6713 | Aradu.A09  | 22715018  | 22715029 | TCCTCAACGTGTACGTAATAGAATG  | TCGTTGGCAAAGAAAGAAAT        | 1                |                      |
| Ad09A6734 | Aradu.A09  | 22844209  | 22844268 | GAGAAACGACAAAATAAACCTGC    | GCTTGTTCATCAATGAAGG         | 2                |                      |
| Ad09A6745 | Aradu.A09  | 22904553  | 22904570 | TTCACAAACTCGTGAACCAAA      | TTGTGTTGGATCGTTTTCCA        | 1                |                      |
| Ad09A6752 | Aradu.A09  | 22940957  | 22941025 | CCTAATTATCACTTTACTCTTTGGGA | GATTTCAATTGACGAGTCGGA       | 1                |                      |
| Ad09A6764 | Aradu.A09  | 23021269  | 23021288 | AAAATACAAAGCTTGCGGGA       | AGCCACTTAGGCCAGGATTT        | 1                |                      |
| Ad09A6775 | Aradu.A09  | 23049925  | 23049978 | GCATGAACGGCTTTAGGATT       | CGTTTAATCACCCCCAAAAA        | 1                |                      |
| Ad09A6778 | Aradu.A09  | 23075173  | 23075186 | GCGTGTCTTCTTCTTGCTT        | TGAAGTGCATGTTTTCTTTTGTG     | 1                |                      |
| Ad09A6780 | Aradu.A09  | 23090945  | 23090968 | GGGCCGAAAATGATAACTGA       | ACATCCAGTCAGGAAGGTGG        | 1                |                      |
| Ad09A6793 | Aradu.A09  | 23225193  | 23225204 | AAGAACCTGGGATTGAGAGTCA     | TCTCCAGCGATTTCTGGTCT        | 1                |                      |
| Ad09A6804 | Aradu.A09  | 23285838  | 23285855 | TCACTCTCCTTTAATCTTCTCAAAA  | TTTTGATTTTGAGCATATAACTTTGTT | 1                |                      |
| Ad09A6813 | Aradu.A09  | 23332462  | 23332503 | GCATCTGAGTTTCCACCGTT       | CACCAAGCATCTAACCTACATCA     | 1                |                      |
| Ad09A6819 | Aradu.A09  | 23364001  | 23364014 | TCTTATGGACCAGCATGCAA       | TTTCAATGGTTAAACTAAACGA      | 1                |                      |
| Ad09A6843 | Aradu.A09  | 23504638  | 23504652 | CACGAACAACAATTTTGGTGAC     | TGCCCAACGAATATTTCAAG        | 1                |                      |
| Ad09A6851 | Aradu.A09  | 23538848  | 23538873 | AGCCTGCGAAGCTAAGACTG       | GCTAGGCGTCTGGATCTTTG        | 1                |                      |
| Ad09A6855 | Aradu.A09  | 23564283  | 23564321 | CGGTCACAAATCACAATACCA      | ATGCAATTGGCTTGCTTCTT        | 1                |                      |
| Ad09A6862 | Aradu.A09  | 23628043  | 23628060 | ACAACCCCTCTTCCATACC        | CTCGAAGGTGGAAGCTTTTG        | 1                |                      |
| Ad09A6867 | Aradu.A09  | 23648826  | 23648867 | AATGTGTGCTGGACATTGGA       | TGAGTCGGCTGCATCATAAA        | 2                |                      |
| Ad09A6882 | Aradu.A09  | 23724335  | 23724346 | CCAAAACCTATAAACATGACCA     | TGCGTGTATTGGGTGAAATG        | 1                |                      |
| Ad09A6891 | Aradu.A09  | 23767555  | 23767569 | AGTCCATCTCCCATGACTCG       | TCCATCTCCCATCACTCTCC        | 1                |                      |
| Ad09A6902 | Aradu.A09  | 23819243  | 23819264 | TGCAAAGGTGTCAGCACTTC       | TGATTCATATGCATGACACTTCTCT   | 1                |                      |
| Ad09A6911 | Aradu.A09  | 23911515  | 23911526 | AGAATCCTCCTCCAGGGAAA       | TTTGTGCAACTCGAACTGG         | 1                |                      |

| ID        | Chromosome | SSR_start | SSR_end  | FORWARD PRIMER (5'-3')   | REVERSE PRIMER (5'-3')     | Bands in parents | Polymorphism in RILs |
|-----------|------------|-----------|----------|--------------------------|----------------------------|------------------|----------------------|
| Ad09A6921 | Aradu.A09  | 24008759  | 24008774 | GACGACGTTCCACCTCCTTA     | TGCAAGATTGGAGTGTTTGG       | 1                |                      |
| Ad09A6926 | Aradu.A09  | 24016692  | 24016733 | TCGAACAAATGGGCAAAAA      | TGAGGGGGAAAATAGGGAAC       | 2                |                      |
| Ad09A6940 | Aradu.A09  | 24111258  | 24111273 | TGCGTTTTGATGATCCGTAA     | GATGGGAGAATGTTGCTGGT       | 1                |                      |
| Ad09A6950 | Aradu.A09  | 24157977  | 24157991 | ATGCGTGGTTCTTTTTGTCC     | CCATCTTCGACAAAGCTTCC       | 1                |                      |
| Ad09A6958 | Aradu.A09  | 24304315  | 24304329 | TAAAATATTGCTCGCCCTCG     | CCTACCTCGCCCTCTCTCTT       | 1                |                      |
| Ad09A6964 | Aradu.A09  | 24401879  | 24401896 | GAAGAGGGAGGAGAAGAGCAA    | CGAAAATCACCCACCCTTT        | 1                |                      |
| Ad09A6973 | Aradu.A09  | 24497646  | 24497714 | AAGAGGCAACCGACTATGGA     | TTCAACAATGAAACCATCGTG      | 1                |                      |
| Ad09A6979 | Aradu.A09  | 24588614  | 24588641 | AGCCGTTGAGAGGAAGTGAA     | CAGATCTACAGCGACGGTGA       | 1                |                      |
| Ad09A6980 | Aradu.A09  | 24590042  | 24590121 | TTGAGACAAATTGTTGACCTC    | CTGACATGTCCTGGCAGCTA       | 1                |                      |
| Ad09A6989 | Aradu.A09  | 24668103  | 24668114 | TCCGTTAAGGATGAGCTGTT     | TCCCTTATGATCTGGCATCC       | 1                |                      |
| Ad09A6998 | Aradu.A09  | 24771364  | 24771381 | TTTTGTTGTTTTTCTCTCTCCTCA | CGTTAAACGCCCAGAATGAT       | 1                |                      |
| Ad09A7008 | Aradu.A09  | 24908325  | 24908344 | GATTCAGTTCTCAATTTGCTTTGA | TTGCTTGCTTTAATGGGAGG       | 1                |                      |
| Ad09A7017 | Aradu.A09  | 24984926  | 24984943 | CACATACACTATGGCGGTGC     | GAGTTTTGGCGGAAGATTTG       | 0                |                      |
| Ad09A7019 | Aradu.A09  | 24986152  | 24986179 | CAAGCAGCAAACACGATGTC     | ATCCAGGCCTAGCCACACTA       | 1                |                      |
| Ad09A7027 | Aradu.A09  | 25037125  | 25037172 | ACTGAAGGATCATTCCCTCG     | TGTTACAAATCCTTATATGCAAATCT | 0                |                      |
| Ad09A7037 | Aradu.A09  | 25067809  | 25067859 | GCTCAAATTCACACACCCAG     | GAATGCACCCAAGTTTTCTGA      | 0                |                      |
| Ad09A7045 | Aradu.A09  | 25125015  | 25125028 | GCTCTTGTGGTGAGCATGA      | CAACCCACCAATCTTCCAT        | 0                |                      |
| Ad09A7054 | Aradu.A09  | 25168436  | 25168455 | GCCATTCCTTCAAGTCAA       | TCCCTCAGAAGCCCAACTTA       | 1                |                      |
| Ad09A7068 | Aradu.A09  | 25285677  | 25285697 | CACCTCGAGCAAAGAAAAG      | AATTCCTTTCCACCCAAAC        | 1                |                      |
| Ad09A7077 | Aradu.A09  | 25312281  | 25312292 | GTGACCAAAGGGGAGTACGA     | TCCCTTTCATTCTTGTCCA        | 1                |                      |
| Ad09A7080 | Aradu.A09  | 25321480  | 25321499 | CTCGACCTGCGAAGTTAAGG     | GATGTAGGTCGAGAGGCACC       | 1                |                      |
| Ad09A7086 | Aradu.A09  | 25387653  | 25387668 | CATGTGGTTTTAAGTGGGCA     | TCCACTTCGAGAAGGATTGG       | 1                |                      |
| Ad09A7091 | Aradu.A09  | 25450225  | 25450273 | GATGGGAAGGCATCATTAT      | CTCAGGTGCTAGAGTGATGGAA     | 1                |                      |
| Ad09A7094 | Aradu.A09  | 25499324  | 25499545 | TTTCACAGCAACGCATTAGG     | CGTCTTCTCAGTACGACGATCA     | 1                |                      |
| Ad09A7096 | Aradu.A09  | 25508864  | 25508890 | ATTTGTGCGTGGGAAGACTC     | TGTCAGACACCACCCTTTCA       | 1                |                      |
| Ad09A7105 | Aradu.A09  | 25529511  | 25529540 | CTTTTTCTTTCACACCCAA      | AACGCAAGCAACAACAACAG       | 1                |                      |
| Ad09A7111 | Aradu.A09  | 25588352  | 25588363 | CCCCGGATATCTCATGTTTG     | GGATATTTGGTGAAGGGGCT       | 1                |                      |
| Ad09A7115 | Aradu.A09  | 25612095  | 25612108 | ATGCCACAAGCACATGGTTA     | TGAAGCAAGAAAAAGCAGTGAA     | 1                |                      |
| Ad09A7117 | Aradu.A09  | 25645361  | 25645372 | TGAATGAGGGATTGGAGGAG     | GCGCCACTCTCGAAATAAAC       | 1                |                      |
| Ad09A7120 | Aradu.A09  | 25665310  | 25665321 | CGCTCCTATTGTCCATTTT      | TGTTGGTACTGGCACCATTG       | 1                |                      |
| Ad09A7129 | Aradu.A09  | 25690325  | 25690339 | CAACATGGAAGAATAGAAAAGCC  | CTGAATCCAAACATAGACGATCA    | 1                |                      |
| Ad09A7135 | Aradu.A09  | 25731162  | 25731173 | CCGAGTTGCATGTATGAGGA     | GGTTTCAGAAAAGCAAATCCC      | 1                |                      |
| Ad09A7140 | Aradu.A09  | 25752347  | 25752391 | AAAGAGCAACAAAGAGACAAAA   | TGGGGTAGGATGTAAGACCTCA     | 1                |                      |



| ID        | Chromosome | SSR_start | SSR_end  | FORWARD PRIMER (5'-3')  | REVERSE PRIMER (5'-3')      | Bands in parents | Polymorphism in RILs |
|-----------|------------|-----------|----------|-------------------------|-----------------------------|------------------|----------------------|
| Ad09A7147 | Aradu.A09  | 25807176  | 25807187 | AACTGCATGTGAGTTTTTACCA  | ATTTGGATGAATTGCCCTTT        | 1                |                      |
| Ad09A7151 | Aradu.A09  | 25831371  | 25831382 | GAAATGCCTCGAATTGCATTA   | TGCATCCATTCATCAGACAA        | 1                |                      |
| Ad09A7164 | Aradu.A09  | 25911386  | 25911397 | ATGGGGCTTAGGTAAGGGTG    | ATGGAAGCACCCCAATGATA        | 1                |                      |
| Ad09A7171 | Aradu.A09  | 25963160  | 25963177 | CCCTTTCCTTTTCTTGAGG     | CTCCCATATAGCCGAAACCA        | 0                |                      |
| Ad09A7179 | Aradu.A09  | 26099260  | 26099271 | TTATTTGGATTTGGGCCTTG    | TTGGGTGTATAATTAATCAGTTGTT   | 1                |                      |
| Ad09A7186 | Aradu.A09  | 26130617  | 26130628 | GGACCATTGTTACATGGCAA    | TGTGAAGTGATGGTGAGGGA        | 1                |                      |
| Ad09A7191 | Aradu.A09  | 26195633  | 26195650 | GACGGGAACTCCTCAGATCA    | GCGTCTTGGGGATTTGTAGA        | 1                |                      |
| Ad09A7196 | Aradu.A09  | 26233708  | 26233725 | TAGAATATTGCTCGCCCTCG    | CCCATAAACCCACCTACCT         | 1                |                      |
| Ad09A7201 | Aradu.A09  | 26270504  | 26270523 | TCCATCAAACACAGAGGCAA    | GCCACTGCCTCACACAATTA        | 1                |                      |
| Ad09A7211 | Aradu.A09  | 26301886  | 26301948 | CCGTTGATCATTTAGGACAGAA  | TGATTTTTAAAGGAAGGCGG        | 1                |                      |
| Ad09A7223 | Aradu.A09  | 26374861  | 26374887 | AAGTGCTGGCCAAAAATGAT    | CATCTAAGGTGTAATGTTTCATTCAT  | 1                |                      |
| Ad09A7227 | Aradu.A09  | 26383583  | 26383608 | AACAAAATAATCACGGCAGACA  | GGCACCAAGTTATAGGCACC        | 1                |                      |
| Ad09A7231 | Aradu.A09  | 26398155  | 26398172 | TACCTTGGCCGAACCTACAC    | CTCGAAGGTGGAAGCTTTTG        | 1                |                      |
| Ad09A7233 | Aradu.A09  | 26442873  | 26443031 | CCCTCTCGTAACGGAACCTA    | CCTCTTGTGCGATCTCCTTC        | 1                |                      |
| Ad09A7236 | Aradu.A09  | 26459120  | 26459175 | ATTTTGGGGACTGAAACCTT    | AACTATGGACCCGAAAAGGC        | 1                |                      |
| Ad09A7238 | Aradu.A09  | 26460806  | 26460817 | CGAGCATGCGTTATTCAACT    | AAACCCATGTTTCTCCCTCC        | 1                |                      |
| Ad09A7241 | Aradu.A09  | 26503722  | 26503745 | AACACAGAGGGAGAGAGAGGG   | TCGAAAATCACCTTCTCTTTT       | 1                |                      |
| Ad09A7251 | Aradu.A09  | 26605230  | 26605301 | TTGGCCCTAGAAATCAAAGTTC  | TTGCAAAAGCTAAGTGCCAA        | 2                |                      |
| Ad09A7259 | Aradu.A09  | 26629284  | 26629301 | TTCCGCAGAGTTGTCAAATG    | CCTAATCAAAACACGCTATCCA      | 1                |                      |
| Ad09A7269 | Aradu.A09  | 26684941  | 26684958 | AGGGAGACGATGAGAGACCA    | ATTTCCAACCATTTTTTCGCA       | 1                |                      |
| Ad09A7274 | Aradu.A09  | 26700682  | 26700696 | CACTGTCAATGCCACACCTC    | TTCTTTGGTTAAATCGGCA         | 1                |                      |
| Ad09A7280 | Aradu.A09  | 26725106  | 26725120 | TTGAACGAGACCCAATGTGA    | TCTCATCTCCACCTCCATCC        | 1                |                      |
| Ad09A7285 | Aradu.A09  | 26741519  | 26741533 | GGGGTTTTGGGTTTCATCTTC   | GCAACAACCAAATTCAGCAA        | 1                |                      |
| Ad09A7289 | Aradu.A09  | 26752628  | 26752693 | TACCTCCAGCTTCATGACC     | ACTTCTGGGAAGCCAAGGTT        | 1                |                      |
| Ad09A7300 | Aradu.A09  | 26825212  | 26825251 | AAGGGGTTCTCTTGTTAACCTGT | AATGTGAAGGGTATCGCACC        | 1                |                      |
| Ad09A7306 | Aradu.A09  | 26853022  | 26853035 | TGATAATTAATGATGGCCAAAAA | TGCCGATAGATGTGGAGTCA        | 2                |                      |
| Ad09A7320 | Aradu.A09  | 27137235  | 27137291 | CGAACCTACCCTCTCCCTC     | TAAAATATTGCTCGCCCTCG        | 2                |                      |
| Ad09A7328 | Aradu.A09  | 27174947  | 27174991 | ACAGTCATCCATGGCAAAGC    | TGTAAACCCTCACGTTACATGG      | 2                | Yes                  |
| Ad09A7337 | Aradu.A09  | 27322637  | 27322656 | TTGAAAATTGGAAGCCAAC     | CCAATCATTACCAGCTGCAC        | 1                |                      |
| Ad09A7344 | Aradu.A09  | 27342494  | 27342508 | ACTAAAATTGGCATGCGGTC    | ACATGAAAGCTGCTGTCGAA        | 1                |                      |
| Ad09A7347 | Aradu.A09  | 27348636  | 27348683 | AACTGATCCCACTATTTTCTTG  | ACATTAATTTATTTATCTTGAACGAGG | 1                |                      |
| Ad09A7355 | Aradu.A09  | 27383290  | 27383303 | ACCAAAGCAACGTTCACTT     | CGGACTAGCAGAGAGTTGGG        | 1                |                      |
| Ad09A7367 | Aradu.A09  | 27450316  | 27450329 | AGACACCCACCATGGTAAT     | CGAGGCTAAAATGCAGTGTG        | 1                |                      |

| ID        | Chromosome | SSR_start | SSR_end  | FORWARD PRIMER (5'-3')       | REVERSE PRIMER (5'-3')     | Bands in parents | Polymorphism in RILs |
|-----------|------------|-----------|----------|------------------------------|----------------------------|------------------|----------------------|
| Ad09A7373 | Aradu.A09  | 27484786  | 27484800 | GAGCAAAGCAAGCAGTGACA         | GATGCCCTTCTTTCCCTTC        | 1                |                      |
| Ad09A7375 | Aradu.A09  | 27488446  | 27488457 | TTGGTGATCCAACCCTTTTT         | CCACATCACCACATCTCCTG       | 1                |                      |
| Ad09A7382 | Aradu.A09  | 27587623  | 27587634 | GAATGATAAAAACCTTCACGGAGG     | AGAGGCTGCATAGTGGAGGA       | 1                |                      |
| Ad09A7385 | Aradu.A09  | 27597330  | 27597343 | CACTCTTTCTCCCCCTTCCT         | CCCCTTCCCTTGTTTCTCTT       | 1                |                      |
| Ad09A7394 | Aradu.A09  | 27657627  | 27657642 | CCAAGATCAGAATGCACAGG         | GTGTTTGGAGGAATGGCAGT       | 1                |                      |
| Ad09A7401 | Aradu.A09  | 27690231  | 27690244 | CGTATGGCATAAATACATATGTTAAAAA | CCCACCTTAGTTCATTTCGCAA     | 0                |                      |
| Ad09A7408 | Aradu.A09  | 27763076  | 27763087 | TTGAAGGGTGAGGTAGGTGG         | ACGCCAGAAATGGCTAAAAA       | 1                |                      |
| Ad09A7422 | Aradu.A09  | 27894273  | 27894292 | CATCGTGATTATCAGCGCAC         | CATGGAACCACATGGTCGTA       | 1                |                      |
| Ad09A7432 | Aradu.A09  | 27920035  | 27920073 | TGCATTGACTCAGGTGCTTC         | CGAAACCAACTCCACCACTT       | 1                |                      |
| Ad09A7437 | Aradu.A09  | 27965327  | 27965341 | CGTCCTCGAGCAAAAAGAAA         | TAATTTCCCATGCACCATT        | 0                |                      |
| Ad09A7440 | Aradu.A09  | 27984986  | 27985001 | CATCAATCTGGCGTTGAATG         | AAGGTAGGTGGGGTTTTTGG       | 1                |                      |
| Ad09A7447 | Aradu.A09  | 28037925  | 28037936 | TCTTCCCCCATTTCTCTCT          | GGCCCTTGACCCAAAATAAC       | 1                |                      |
| Ad09A7449 | Aradu.A09  | 28040761  | 28040775 | CCAACAAAAGAGGTTCCGT          | GGTCCTCTCCAACATAAGCC       | 1                |                      |
| Ad09A7462 | Aradu.A09  | 28140813  | 28140848 | AAACCTCCATGTTTGTGGC          | CAGCGTCACCCTCATCTACA       | 1                |                      |
| Ad09A7467 | Aradu.A09  | 28176663  | 28176680 | CAGGAAAAAGGCACTCTTG          | TGAAGTCACCAAGCATTCTCC      | 1                |                      |
| Ad09A7472 | Aradu.A09  | 28193318  | 28193329 | CCAAGACTCACTTGTGACCG         | TCCCTCCAATTTGCTCTCAC       | 1                |                      |
| Ad09A7474 | Aradu.A09  | 28199794  | 28199805 | CCCAAACATAAGGGTGAGGA         | TTTCTTATCTTTTTCAAAACCACC   | 1                |                      |
| Ad09A7480 | Aradu.A09  | 28240896  | 28240922 | TGTTGGTGATGGTTAAGGCA         | AGCCAAACAGGAACACAACA       | 1                |                      |
| Ad09A7483 | Aradu.A09  | 28246396  | 28246443 | CAAACCAATCTAGCCCTAAGAGG      | TGGGCATGCATGAAAATATC       | 2                | Yes                  |
| Ad09A7494 | Aradu.A09  | 28340150  | 28340169 | AGGGCAGATGAAATCAGTGG         | CTGCCGTTTCGTCGTTATCTT      | 1                |                      |
| Ad09A7505 | Aradu.A09  | 28394420  | 28394437 | TGTTGAGCCACCACTTTTCA         | TGCTAGAAGGGAACCTGGAA       | 1                |                      |
| Ad09A7517 | Aradu.A09  | 28467585  | 28467604 | GTGCGGGTTGAGCTTTAACT         | TACACCCTAGGCCAACATT        | 1                |                      |
| Ad09A7520 | Aradu.A09  | 28472047  | 28472060 | CATTAGGCGTTAATGTGCCA         | CCCTAGCGTAGTGCCATGTT       | 1                |                      |
| Ad09A7529 | Aradu.A09  | 28578763  | 28578818 | ATGACAGCAGCAGCTCAGTG         | CCCAACTCCCTTTCACACTC       | 1                |                      |
| Ad09A7532 | Aradu.A09  | 28598260  | 28598322 | TGGTCATCACTTTTAAACCATCAA     | TGAAATTTAAAAAGTGGTTGGTACAC | 2                | Yes                  |
| Ad09A7543 | Aradu.A09  | 28625052  | 28625063 | GAAATGGAAAACCGGGAGTT         | GCAAATTTGGAGCACCGTAAC      | 1                |                      |
| Ad09A7545 | Aradu.A09  | 28628957  | 28628992 | CACGTGCTAAATGAGCGAAA         | CTTGCTTTGCACGTTTGTGT       | 1                |                      |
| Ad09A7548 | Aradu.A09  | 28631594  | 28631605 | GAAACAAGCGAAAAACTCGC         | CGTTTCTCACGTGTGTGCTT       | 1                |                      |
| Ad09A7551 | Aradu.A09  | 28632272  | 28632301 | CACACACACCCACATACACG         | GTATTTTTCGCTCGTTTCGC       | 1                |                      |
| Ad09A7553 | Aradu.A09  | 28635671  | 28635682 | ACGAAACGAGCGAAAAACAT         | CGTTTCTCACGTGTGTGCTT       | 1                |                      |
| Ad09A7560 | Aradu.A09  | 28652532  | 28652563 | CTCTGTAAGCCTCGTCGG           | AGGACCTGACATTGGTGGAG       | 2                |                      |
| Ad09A7567 | Aradu.A09  | 28711232  | 28711245 | GGCTCACGTTTCTGAAGACC         | CGATAAGCGAAAACATTCCAA      | 1                |                      |
| Ad09A7577 | Aradu.A09  | 28752604  | 28752619 | CATCATGGAGGGCTTCCTTA         | TTCAATCCCTTTTCAGGTGC       | 2                | Yes                  |

| ID         | Chromosome | SSR_start | SSR_end   | FORWARD PRIMER (5'-3')     | REVERSE PRIMER (5'-3')   | Bands in parents | Polymorphism in RILs |
|------------|------------|-----------|-----------|----------------------------|--------------------------|------------------|----------------------|
| Ad09A7742  | Aradu.A09  | 29926299  | 29926385  | TGCTGTTTAAGTGGATTCATGC     | CCCGAACTTGTACTTCGAGA     | 1                |                      |
| Ad09A8429  | Aradu.A09  | 35277638  | 35277727  | CTCTTTCGGTGTTCTTGTCTCA     | AAGGCGTTAAATTCCTTCCTG    | 1                |                      |
| Ad09A9337  | Aradu.A09  | 42264576  | 42264662  | GGAGGAGAAGAAGCAGAAGGA      | TACGTGCCTCCTCCAATCTC     | 1                |                      |
| Ad09A9806  | Aradu.A09  | 46912466  | 46912615  | CAAGCGCCTTCTATTCTACTCC     | AAGGGCATCAGTTTCATTTCA    | 1                |                      |
| Ad09A10442 | Aradu.A09  | 52956563  | 52956669  | ACGCAAAAAGGGAGGAGAAT       | ACATACGCGTGGAGCTTCTT     | 2                | Yes                  |
| Ad09A11056 | Aradu.A09  | 58273948  | 58274120  | TTTTGCACGTGTCTGTGGTT       | ATGCAAAACGAGCGAAAAAC     | 0                |                      |
| Ad09A11275 | Aradu.A09  | 59537796  | 59537882  | GCTTTTGTCTTCCCTTTCCC       | TTCTTCACCTTGGCCTAACC     | 1                |                      |
| Ad09A12809 | Aradu.A09  | 72781534  | 72781656  | GAACTCTCTCCCATGGCTCC       | CGAAGAAAGAAGAAAGGGGG     | 1                |                      |
| Ad09A13461 | Aradu.A09  | 78584028  | 78584167  | ACTATGCCCATGGTGAAAAA       | CGACGTGATGGAGGTTAGGA     | 2                |                      |
| Ad09A16310 | Aradu.A09  | 98066192  | 98066274  | CCCAACACTTTTGCATTTCA       | GCTCAAAAATTCATGTTCCACA   | 1                |                      |
| Ad09A16382 | Aradu.A09  | 98520771  | 98520850  | CCCAACACTTTTGCATTTCA       | TCTTAGCTCAAAAATCATGTTCCA | 1                |                      |
| Ad09A17943 | Aradu.A09  | 106132860 | 106132953 | GTTGGTTGGTGTGGTGTG         | CGAATCCGTCCCTCATCTAA     | 2                |                      |
| Ad09A18059 | Aradu.A09  | 106694964 | 106695068 | CGAGAAGATGGCACAAATCA       | TCTTCGTCTTCATCCCCAAG     | 2                | Yes                  |
| Ad09A19214 | Aradu.A09  | 111804894 | 111804976 | CCACAAAAGGGTTTCAGAGC       | GGAATTGGAATATCCACTTTCGTA | 1                |                      |
| Ad09A20111 | Aradu.A09  | 114307256 | 114307363 | ACTGAAATGGTGACTTGCGA       | CTTCATCGCTCACTTGCTCA     | 1                |                      |
| Ad09A20520 | Aradu.A09  | 115381631 | 115381730 | CGAAGGAAGCTCATCCAGAC       | CTTCATGCCATTGCAACATT     | 1                |                      |
| Ad09A20810 | Aradu.A09  | 116091910 | 116092046 | TCGCTAGAAAAGAAAATGTTGATGA  | CAAGAAGGAGAAACACATTTTGG  | 1                |                      |
| Ad09A21168 | Aradu.A09  | 117134636 | 117134754 | TCCCATCTCTAAGGAGGAAACA     | AGCTGACCACTCGACCAACT     | 2                |                      |
| Ad09A21954 | Aradu.A09  | 118984140 | 118984273 | TTGGAATTCAAATTGGTGAAGT     | CCCACACCTTGCAAATTACC     | 1                |                      |
| Ad09A22067 | Aradu.A09  | 119216891 | 119217021 | GGTGTGAGAGGTGGCATT         | GTCTTTGGTTCGGCAAGTGAG    | 1                |                      |
| Ad09A22399 | Aradu.A09  | 119991196 | 119991385 | CTGCGAGGAGGAAGAGAGG        | CGTCAATGGCTGAATGTCAA     | 1                |                      |
| Ad09A22583 | Aradu.A09  | 120376994 | 120377100 | CTTTGGAGGAGGAAGAGGCT       | TGGAAGATGACGATGATGGA     | 2                |                      |
| Ad10A707   | Aradu.A10  | 2188004   | 2188105   | TTAATTATGCGCTGCCACA        | TCATGAACGCTGCCAAATAG     | 2                |                      |
| Ad10A778   | Aradu.A10  | 2344409   | 2344512   | TTGTTTAGGTTGATTGGTACTTGC   | CCTTGAGACATTTTCCGCTC     | 0                |                      |
| Ad10A1454  | Aradu.A10  | 4284971   | 4285051   | GTTGTCTCTCGTTCCTTCGC       | AGCGAACCCAACAAATTGAG     | 2                |                      |
| Ad10A1537  | Aradu.A10  | 4602523   | 4602638   | CTATCCAGCTGTTTCGGTCTGT     | TGCAAGATCTTTCTTCTTGGA    | 1                |                      |
| Ad10A1855  | Aradu.A10  | 5601171   | 5601252   | GCCATTGTCTTGCTTCTTC        | AAGAATCTGCGGTACAAAAGAGG  | 2                |                      |
| Ad10A1964  | Aradu.A10  | 5988399   | 5988527   | TCCCCATCCAAAAATAAAA        | CTCTTCACCCAGTCACCACC     | 1                |                      |
| Ad10A2278  | Aradu.A10  | 7056672   | 7056831   | TGTAAGCTTCCAAACGAACAAA     | TTTATTGTGTTGAGCTCCTTTTT  | 0                |                      |
| Ad10A2434  | Aradu.A10  | 7621021   | 7621102   | AGGGGACAAAATTACCCCAA       | TTTCAAGGTTGTAATGGGGC     | 1                |                      |
| Ad10A2722  | Aradu.A10  | 8646182   | 8646329   | CGTGCAAGAAGAAGAAGAACG      | AAACGCGATGCAAGGTCTAC     | 1                |                      |
| Ad10A3834  | Aradu.A10  | 13208739  | 13208870  | TGTTTTATCAAATATTTTTACCCCTT | TCTCTCGCTCCTCTCTCTCG     | 2                |                      |
| Ad10A3961  | Aradu.A10  | 13962788  | 13962936  | GGTCCCAAGGTTTCAATTT        | TTCCACAACAAATTTCAAAAA    | 1                |                      |

| ID         | Chromosome | SSR_start | SSR_end   | FORWARD PRIMER (5'-3')  | REVERSE PRIMER (5'-3')    | Bands in parents | Polymorphism in RILs |
|------------|------------|-----------|-----------|-------------------------|---------------------------|------------------|----------------------|
| Ad10A3962  | Aradu.A10  | 13963232  | 13963320  | GTGATGATGGAGTGGCAGTG    | TTTTTCGCTCCAAAATGGTC      | 2                | Yes                  |
| Ad10A4326  | Aradu.A10  | 15899716  | 15899850  | CGCGAATTCGAATCTCCTAT    | TTGATGCACAAAACAAAAGC      | 2                | Yes                  |
| Ad10A4577  | Aradu.A10  | 17134425  | 17134506  | GCGAATAAAGGAGAGCAACG    | ACCTGAGAGTCGTACCACCG      | 1                |                      |
| Ad10A4720  | Aradu.A10  | 17678478  | 17678599  | AACGGGCTAAAACCGCTAAT    | TCACGGAAGGTGATGATGAA      | 2                | Yes                  |
| Ad10A4830  | Aradu.A10  | 18187975  | 18188075  | TCCCTCGTGATTTTCGTTTTTC  | TCACTTCCATTAGTTGGGGG      | 1                |                      |
| Ad10A5091  | Aradu.A10  | 19975224  | 19975334  | AAACTTTTTGTCCACCGTCCTTC | TGACAATGAAACTTTATAACCGACA | 0                |                      |
| Ad10A5444  | Aradu.A10  | 22122832  | 22122955  | TGATGGACGAGAACGATGAA    | CAAATCTCTACGCGTCCAAG      | 1                |                      |
| Ad10A6122  | Aradu.A10  | 26269988  | 26270068  | TCTGGGTAAAGTACCGTGGC    | CGCGTATCCCCAAGAGTCTA      | 1                |                      |
| Ad10A6382  | Aradu.A10  | 27850632  | 27850774  | AAAATAAAAGCGCAACGCTC    | TCTCGTTAGGCGTCTGGACT      | 1                |                      |
| Ad10A6773  | Aradu.A10  | 30648463  | 30648588  | TCTCTCCTCCTGATCTTCTGCT  | TGTTTTCTTCTTCTTTTGTAAATTT | 0                |                      |
| Ad10A8566  | Aradu.A10  | 46053220  | 46053317  | CCCCACAAAGGGAGAAAAAT    | CAGCTTCCCCAGCTACCTC       | 1                |                      |
| Ad10A9006  | Aradu.A10  | 50018114  | 50018196  | CCCAACACTTTTGCATTTCA    | GCTCAAAAATTCATGTTCCACA    | 1                |                      |
| Ad10A9098  | Aradu.A10  | 50720163  | 50720249  | GGGTTAGGAATCGTGATGGTT   | CCTTTGTAAACTCGAAACCG      | 1                |                      |
| Ad10A10356 | Aradu.A10  | 63732451  | 63732537  | GCCATTGTTTCCGCTGTAGT    | CGTGAGTCGCTACTGAATCAAA    | 1                |                      |
| Ad10A10685 | Aradu.A10  | 66003438  | 66003536  | CTAAGTGTGCACGTTTTCCC    | CATGCATCTTCTTTCCAATTCA    | 2                | Yes                  |
| Ad10A10900 | Aradu.A10  | 67344729  | 67344809  | GAGGAAGAAGAACGTGCAGC    | CGCGCATTAACTCATTTTGA      | 1                |                      |
| Ad10A11120 | Aradu.A10  | 68614671  | 68614752  | CCGTACGATGGTACACCTGA    | AAGTGAATAGCAAGGATGGATGA   | 1                |                      |
| Ad10A11890 | Aradu.A10  | 74375862  | 74375960  | ATGCCGTGTGTGTGTGCTTC    | AAGTGGGTGAAGACGGTGAC      | 1                |                      |
| Ad10A12567 | Aradu.A10  | 79393677  | 79393829  | GTTGCTCACCTCGAGAAAA     | GCCAAAACCCACACATCTCT      | 1                |                      |
| Ad10A12887 | Aradu.A10  | 82018237  | 82018320  | CCTTGGCCGAAACTACACAT    | GCTTTTGTCTTCCCTTTCCC      | 1                |                      |
| Ad10A13573 | Aradu.A10  | 86395465  | 86395563  | GCATGGGGAGAGAGAAAGAAA   | TTCTCCCCTTCCCCTCTTT       | 2                |                      |
| Ad10A14091 | Aradu.A10  | 88840171  | 88840299  | AGAATATCAAGCTCCTGGCG    | TCCTATGGCAAGCGAAGTTT      | 2                |                      |
| Ad10A14183 | Aradu.A10  | 89243288  | 89243392  | TCAATCCCCAACGTTTTTCT    | TCCGTTTGTTAAAGTCGGAGA     | 1                |                      |
| Ad10A14563 | Aradu.A10  | 90987051  | 90987192  | TTGTTGTTGCTGAATTTGTTGA  | GAACATAAGCCTACGCCCAA      | 1                |                      |
| Ad10A14670 | Aradu.A10  | 91476961  | 91477042  | CTCCTCCTCATCTCCTGCTG    | ACTGCACATTTTCACTGCAC      | 1                |                      |
| Ad10A15279 | Aradu.A10  | 94486547  | 94486627  | ATTCACGCCATTTTCACGTT    | TCATTTTCGCGTGTTCATC       | 1                |                      |
| Ad10A15580 | Aradu.A10  | 95536559  | 95536695  | CGCGACTAACTCATTTTGA     | GAGGAAGAAGAACGTGCAGC      | 2                |                      |
| Ad10A15608 | Aradu.A10  | 95622983  | 95623091  | GTTGGTGTGGTTGGTGTGG     | TTCGTCCCTAATGTCTTGGG      | 1                |                      |
| Ad10A15687 | Aradu.A10  | 95992824  | 95992910  | TGCCCTATCCATGCTTCAAT    | GTAGGACTGCCCGGTGTATC      | 2                | Yes                  |
| Ad10A16640 | Aradu.A10  | 99402880  | 99402959  | TCAACGTTGGATCAATGAA     | CATAGTGCTGATGCTGCTGAA     | 1                |                      |
| Ad10A18171 | Aradu.A10  | 103886955 | 103887054 | TGAGGGTTGAATCGAGTAAATTG | CGGAAAATTGTTAATCCGAAGA    | 1                |                      |
| Ad10A18338 | Aradu.A10  | 104320484 | 104320653 | AAGGGGCCCACTTTGTATTT    | GGAATTACAAGCTGAAAATCACTC  | 2                | Yes                  |
| Ad10A18566 | Aradu.A10  | 104823722 | 104823847 | CACACGCTCAACACATACGA    | CAAAAGAAGAAGACGCTCCG      | 1                |                      |

| ID         | Chromosome | SSR_start | SSR_end   | FORWARD PRIMER (5'-3')      | REVERSE PRIMER (5'-3')      | Bands in parents | Polymorphism in RILs |
|------------|------------|-----------|-----------|-----------------------------|-----------------------------|------------------|----------------------|
| Ad10A19369 | Aradu.A10  | 107107303 | 107107414 | TGGAGAAAGAGAAGGCAAGAA       | TTCTCCACGTACAAGCGTTTT       | 1                |                      |
| Ad10A19546 | Aradu.A10  | 107544391 | 107544504 | CACCATCACCACCACCACTA        | CAAAAATGAAGGATAGGTCAACAA    | 1                |                      |
| Ad10A19710 | Aradu.A10  | 107890608 | 107890722 | GTGAAACGCACACCATCAAC        | TCGACCCCATCTCATAACACA       | 1                |                      |
| Ad10A19712 | Aradu.A10  | 107896034 | 107896138 | CAGTTTGCAAGTTTCAGGCA        | ACCAGTTTTCGTCCAATCCTC       | 1                |                      |
| Ad10A19801 | Aradu.A10  | 108103731 | 108103821 | GTGCAATTTGGGAAGCAAGT        | TGATCAATCACCAATAAAGCCA      | 1                |                      |
| Ad10A19968 | Aradu.A10  | 108473506 | 108473613 | GGCACTCAAGTTTGATTGAAAA      | GGCACTCAAGTTTGATTGAAAA      | 0                |                      |
| Ai01B3449  | Araip.B01  | 8336815   | 8336955   | TCCATTAGGTGACACTTTTCTTTG    | CACAAATTTTGCTTCAATTCCA      | 0                |                      |
| Ai01B3535  | Araip.B01  | 8604177   | 8604393   | CAGTCATAGCCCTATCTGTGAGA     | CGCCTATTCACGTGCTGAAC        | 1                |                      |
| Ai01B5245  | Araip.B01  | 14534488  | 14534594  | CCCTCTGATCACTGATGCTTT       | TTTTTGTGTGACATAATTTAAGAGTGA | 1                |                      |
| Ai01B5367  | Araip.B01  | 15002822  | 15002951  | CCAATCATTGCCCATGTTTAC       | ACAATAAGCCAAAACCATGT        | 0                |                      |
| Ai01B5607  | Araip.B01  | 15889664  | 15889848  | AAAAAGACGAATTA AAAAGCATAAAA | ACGACGGTTGATGCTTGAG         | 0                |                      |
| Ai01B5852  | Araip.B01  | 16657378  | 16657500  | TCTCCATTGAATGATGATAAATGAC   | TCTTGCTCTACTCCTTCGCC        | 1                |                      |
| Ai01B7136  | Araip.B01  | 21940707  | 21940862  | TCTTTGGAGGTTTTTGGTGG        | TCCTCTTTATTTTGAAACATTCTCTTT | 2                | Yes                  |
| Ai01B7542  | Araip.B01  | 23694767  | 23694881  | CTTGCGGTTGTTGTTGTTGT        | GGGTACAAGTCAAGGAAAGCC       | 2                | Yes                  |
| Ai01B7608  | Araip.B01  | 23948832  | 23948933  | AGCCAGAAGCGTGACATTTT        | GGGTGCGGTGAGTTTACAAG        | 2                |                      |
| Ai01B7788  | Araip.B01  | 24847018  | 24847195  | TCTAGCTGCCCTGTTTCGAT        | ATGCTCCACTTTATTGTGTTGA      | 1                |                      |
| Ai01B7963  | Araip.B01  | 25571278  | 25571400  | TCAATCCCAAACGTTTCTCTC       | TCCTCCGTCCAAAATAAAA         | 1                |                      |
| Ai01B8018  | Araip.B01  | 25723222  | 25723357  | TGTCCCTTAGCCAAAGATTCA       | GGTATGGTCGGCAAGTCAGT        | 2                | Yes                  |
| Ai01B8434  | Araip.B01  | 27673941  | 27674050  | AAACCGTATGCATTGATGCTC       | ACTTTGCTTTGGGGCATTTT        | 1                |                      |
| Ai01B9610  | Araip.B01  | 33820698  | 33820804  | TGCCGATCCATTTTCTTCTC        | TGGGCTATTGAGACGAGCTT        | 1                |                      |
| Ai01B9867  | Araip.B01  | 34991624  | 34991748  | GCTTCACCACCGCCATAC          | CCCAGAATCAGCAACAACAA        | 2                | Yes                  |
| Ai01B10318 | Araip.B01  | 37301046  | 37301160  | CTCACGGTGACAAAGCTTCA        | GGGACGAGGGGATACAAAAGG       | 1                |                      |
| Ai01B10857 | Araip.B01  | 40300802  | 40300929  | ACTGGACGGAACGCATAAAC        | TCAAAGCTCCTCCCTTCGTA        | 1                |                      |
| Ai01B11045 | Araip.B01  | 41439842  | 41440034  | TCGCATTTTCATTTT TAGGTCA     | TCCTTGAAAATTTTCATTATTTTG    | 2                |                      |
| Ai01B11162 | Araip.B01  | 41926681  | 41926807  | CAACCCAATATCCCAAATAACA      | GGGATGCTGGACTTTTGATG        | 2                |                      |
| Ai01B11694 | Araip.B01  | 44474383  | 44474490  | GACCCTGCATGAACAGGATT        | AAAAACTGCTGAATGGTCCG        | 2                | Yes                  |
| Ai01B15952 | Araip.B01  | 69119283  | 69119465  | TTAGAATGTTGCTCGCCCTC        | CACACATCCCTCCATCTCCT        | 1                |                      |
| Ai01B16294 | Araip.B01  | 71122737  | 71122885  | TGCTTTTGGAGAAACAAGTGC       | GCCAGATAAACGCAATCAAC        | 1                |                      |
| Ai01B16894 | Araip.B01  | 74072797  | 74072897  | TTCCTTTATGTGTTAGAGGAACAGA   | TTTCAATTTGCTTTTATTCCTTTTC   | 0                |                      |
| Ai01B18099 | Araip.B01  | 81569866  | 81570026  | CAAGAATTCTCTCTATAGGGCATCA   | GGCTCAAATCTCACTTGCCT        | 1                |                      |
| Ai01B19054 | Araip.B01  | 87275020  | 87275190  | AAAGGGGAGGTGGAGAAAGA        | CTCTCCCCCTTGCTTCCC          | 1                |                      |
| Ai01B19390 | Araip.B01  | 89755614  | 89755784  | TTGTAAGACCCCAAGTTTTCG       | ACCATAACATGCCACGTTTTT       | 1                |                      |
| Ai01B20288 | Araip.B01  | 95603358  | 95603498  | TTTCAAGGTTGTAATGGGGC        | TGGGTAGCTAGGCATGATTC        | 1                |                      |

| ID         | Chromosome | SSR_start | SSR_end   | FORWARD PRIMER (5'-3')    | REVERSE PRIMER (5'-3')      | Bands in parents | Polymorphism in RILs |
|------------|------------|-----------|-----------|---------------------------|-----------------------------|------------------|----------------------|
| Ai01B21120 | Araip.B01  | 101007835 | 101007994 | CCATGCCTGGACCTTCATC       | TGGAATTTTATGCAACGCAG        | 1                |                      |
| Ai01B22102 | Araip.B01  | 106506737 | 106506894 | CCCTTTTACCCTTCTGCCTC      | TCCAAAATTGTACACACACATTCA    | 2                |                      |
| Ai01B22109 | Araip.B01  | 106539177 | 106539330 | AAAATTTGGAAATTGGGAACA     | TTTCCACACACTCATGCATTC       | 1                |                      |
| Ai01B22325 | Araip.B01  | 107659075 | 107659212 | TTGAGGAATTATTGACTTTGGACA  | CGAAACCATGGGTTATTTCAA       | 2                |                      |
| Ai01B23042 | Araip.B01  | 111416789 | 111416924 | TGAAGCAAAGAAACAGCAAAA     | AACCATTGATGCTCAAAGCC        | 1                |                      |
| Ai01B23569 | Araip.B01  | 113865036 | 113865141 | TTCTTCCGAACAAAGATGGA      | AAAAACAATGCCAAAAAGCG        | 1                |                      |
| Ai01B23998 | Araip.B01  | 115437488 | 115437602 | AATTGGGAACCCCAAGAAAG      | TGTAATGGGGCCAAGGTAAG        | 1                |                      |
| Ai01B24617 | Araip.B01  | 118165174 | 118165332 | CGTATCGGAGAACAAGCACA      | CACAAACACATCAACCTCCG        | 2                |                      |
| Ai01B26086 | Araip.B01  | 123957586 | 123957724 | CCCTTTTGTTAATTTTCTCCGTT   | CCAACTAAAATTCTTTGAAAATTGA   | 2                |                      |
| Ai01B26917 | Araip.B01  | 126818368 | 126818471 | AGACATAACAGTCTTTCGTCCAA   | CCATTGTTTGGTGCCATCTT        | 2                |                      |
| Ai01B28343 | Araip.B01  | 131563616 | 131563733 | TGACCTAGACTCGACTCACGA     | AATTTTGAAGGATTAGAATTGAGTAAA | 0                |                      |
| Ai01B29003 | Araip.B01  | 133754288 | 133754410 | GAAGAAGAAGCTCGTGGTGG      | TTTCAATTTGTTTTAAAATCGTCC    | 1                |                      |
| Ai01B29350 | Araip.B01  | 134632644 | 134632756 | TTCTTCTTTTTCCGTGCCTC      | CAATGGAAATCGAAAATAACGA      | 1                |                      |
| Ai02B51    | Araip.B02  | 150586    | 150770    | GTTTTAAACGCCAACCTGG       | TCCATTGTTTCTTTTCAGTCACC     | 1                |                      |
| Ai02B685   | Araip.B02  | 1663450   | 1663552   | GAAAGAGAGAGAAGCGAGAGAGA   | CCCCCTTTTCCCTTTTTTCTA       | 1                |                      |
| Ai02B757   | Araip.B02  | 1804282   | 1804384   | TTTACAATGTCAACCCCT        | AAATGGTATTTTGCTAACCATTAAG   | 1                |                      |
| Ai02B2350  | Araip.B02  | 5950694   | 5950822   | GGTTACATGCTGCCGAAAT       | TTCTCGTCGTCATTGCTGAT        | 2                | Yes                  |
| Ai02B2356  | Araip.B02  | 5954408   | 5954543   | CTCTAGGCTTGGGAGCTTCA      | ATCTCTGGCGACGGAGGTAG        | 2                | Yes                  |
| Ai02B2534  | Araip.B02  | 6367106   | 6367218   | GAGAGAGCATGGGGAGAGAA      | TCCATTGCTTTCGTTCCCTT        | 2                | Yes                  |
| Ai02B2634  | Araip.B02  | 6596579   | 6596679   | CTGCGAAGTTAAGGCAGACC      | TGGTTCATTTTGAGGCCCTA        | 2                | Yes                  |
| Ai02B4199  | Araip.B02  | 11170675  | 11170798  | GCTTATATAAAGGAAACGTGGCA   | AGGGGTAAGCTTCGTTTCAA        | 2                | Yes                  |
| Ai02B4457  | Araip.B02  | 11995589  | 11995738  | TTGAGGTAAATCTTCCCAACC     | CAATTTGCACTAAGCCACAAA       | 2                | Yes                  |
| Ai02B4975  | Araip.B02  | 13491227  | 13491356  | CAACTTCTCCTGCCGAGTC       | TGAAACTGAACTGCAACGG         | 1                |                      |
| Ai02B5334  | Araip.B02  | 14444960  | 14445087  | CACAAGCTTCTTTTCTGCAC      | CGAAAACAAGCACACAAACAA       | 1                |                      |
| Ai02B5372  | Araip.B02  | 14662693  | 14662802  | TTCTTATCTTTTTCAAACCACCT   | GGGTTCGAATTTGGTGAGTG        | 1                |                      |
| Ai02B6055  | Araip.B02  | 17017965  | 17018117  | GCAAGAGAAAAGGAAAGAGAAA    | CCTTCCCCCTCTCCCTCT          | 1                |                      |
| Ai02B6072  | Araip.B02  | 17044259  | 17044414  | TGTGCGTGTGTGTTGCAT        | CACACAGTTTTAAAATATGAACAGAAA | 2                |                      |
| Ai02B6565  | Araip.B02  | 18825907  | 18826026  | GGAGGAAATGATGGTGTGG       | TATATTCACGCGCTTTCAGC        | 2                |                      |
| Ai02B6837  | Araip.B02  | 19749179  | 19749351  | TGAAGAACAAGACGATCATTAAACA | GCTTGATTTCAAAAACCATGAA      | 2                | Yes                  |
| Ai02B7219  | Araip.B02  | 21625481  | 21625614  | TCTCTCTGAACACTTGTCAATTT   | TGCAATACTAGATGTAAGTAGAAGCAA | 1                |                      |
| Ai02B7519  | Araip.B02  | 22997068  | 22997210  | CTTCTCCGATGAACTAGCGG      | GAGAAGCGATGCGAAGAGAG        | 2                | Yes                  |
| Ai02B7671  | Araip.B02  | 23681996  | 23682133  | CGCCTCCTTCTCCATTTTCT      | AAAAGAAGAAGACGCAATACTGG     | 2                |                      |
| Ai02B7672  | Araip.B02  | 23691457  | 23691624  | TTGGTGATGACAATAACGAAAGA   | GCCCACCATTTCATAACACC        | 2                |                      |

| ID         | Chromosome | SSR_start | SSR_end  | FORWARD PRIMER (5'-3')      | REVERSE PRIMER (5'-3')     | Bands in parents | Polymorphism in RILs |
|------------|------------|-----------|----------|-----------------------------|----------------------------|------------------|----------------------|
| Ai02B7886  | Araip.B02  | 24574199  | 24574310 | GCAAGCCCGTATGCATTTAT        | CATGCAACTCACCCATTCTC       | 2                | Yes                  |
| Ai02B8092  | Araip.B02  | 25636283  | 25636396 | GGAAGCATGCTCATGTGAAA        | TCCCATGTTTCATTGATTCTTTTT   | 0                |                      |
| Ai02B8213  | Araip.B02  | 26193488  | 26193594 | GGGGAGAGAGAGGGGAGAGAA       | CCAGTTAATCAAACCAAAACCA     | 2                | Yes                  |
| Ai02B8571  | Araip.B02  | 27687240  | 27687344 | AAAAGAACATTCAAATGCAAGTAA    | CGATCCCTATCGTAATTATTCGT    | 0                |                      |
| Ai02B8654  | Araip.B02  | 28165852  | 28165953 | TCTGAGCTACATCGCCACTG        | AGCCAACCCCATCTAGTACG       | 2                | Yes                  |
| Ai02B9273  | Araip.B02  | 31316386  | 31316485 | AAGAGAGAACGGGGAAGAGC        | TTCGAGCTCTCCTTCTCAGC       | 1                |                      |
| Ai02B10195 | Araip.B02  | 36251743  | 36251855 | GGGACGAAGAGTAATGAAAAAGG     | GAAAAGGAACATGATCAAACCA     | 1                |                      |
| Ai02B11229 | Araip.B02  | 43346672  | 43346835 | TCCCTTTTTATTTCTTTTTCTTTTT   | GGGCATTTTTGTTCCTTTTT       | 1                |                      |
| Ai02B11533 | Araip.B02  | 45269405  | 45269565 | AAACTCAGTTCGTCATCGCA        | TCAGCAACAACAATATCCACA      | 2                | Yes                  |
| Ai02B11709 | Araip.B02  | 46122296  | 46122428 | TTGATTTTCAAATCTTTTTCAACTAAC | GGGTGAGGAGAGCAGAGATG       | 1                |                      |
| Ai02B12974 | Araip.B02  | 53818891  | 53818990 | CAGTGGCAGAAGAGTCCACA        | TGAACTCGTCGTTGAGCATC       | 2                |                      |
| Ai02B13410 | Araip.B02  | 56173911  | 56174086 | AGAGGTTATTTTGGAGAAACAGG     | GGTGGTAAGGTATTACGACCTCTAAA | 1                |                      |
| Ai02B13600 | Araip.B02  | 57294505  | 57294621 | GCCAGGTTCCAACATATCTCA       | TCATCTTGTTGCATAGATTGGG     | 2                |                      |
| Ai02B13762 | Araip.B02  | 58325105  | 58325274 | ATCGAGAGGGGGAGAGAGAG        | GCACCAGTTTAAACCAGTTCAT     | 1                |                      |
| Ai02B14963 | Araip.B02  | 64856428  | 64856538 | AATAAAACAATGCATGCCCC        | TGGAAGACTATTTTGGACTTGC     | 1                |                      |
| Ai02B15581 | Araip.B02  | 68625059  | 68625210 | TGAAACCAGGGTGTGTGCTA        | CCCATCATCTTGCCCTATGT       | 1                |                      |
| Ai02B16100 | Araip.B02  | 71523300  | 71523447 | AAGAGGGATAGGAAATTGATTATGT   | CCTGTTTGAAACTTAAACCGAA     | 0                |                      |
| Ai02B16596 | Araip.B02  | 74236397  | 74236504 | TTTTCTACGTTCTCTTTCTGATT     | CCATGAGCTCACGTGTCAGT       | 1                |                      |
| Ai02B16698 | Araip.B02  | 74698067  | 74698225 | AAAGAAAGGGCAAAAAGAGGA       | TTTTCTCCCCTCTCCCCTC        | 2                |                      |
| Ai02B17331 | Araip.B02  | 77422793  | 77422948 | GAGGAGGAGGGAAGGGAAG         | TCAGAAATTCTACAACAAAATCCA   | 0                |                      |
| Ai02B17702 | Araip.B02  | 79096090  | 79096209 | ACTTTTGGCACCAGAACCTG        | GCCATTCACCATATACCATGC      | 1                |                      |
| Ai02B17732 | Araip.B02  | 79245272  | 79245478 | CACTCTCTTATCATTCCACTTATCAT  | TGATAAATGACTTAACAAAACAGAAA | 1                |                      |
| Ai02B17748 | Araip.B02  | 79307580  | 79307718 | TTGCCATCGGATGTATTTGA        | TCACAACGGCACCTGTTTTA       | 2                | Yes                  |
| Ai02B18230 | Araip.B02  | 81418267  | 81418422 | AGGGGGAGCAAGATGAAAA         | CCCATTCTCTCCCTCTCTTTC      | 1                |                      |
| Ai02B18857 | Araip.B02  | 83865502  | 83865622 | TGCACCATTTTAACCAATTCA       | TAGAGAGGGAGAAAAGGGGG       | 2                | Yes                  |
| Ai02B19680 | Araip.B02  | 86968158  | 86968312 | ACTAACAACGAAAGGGCCAA        | CATATTGAATTGAACATCCGACA    | 2                | Yes                  |
| Ai02B20354 | Araip.B02  | 89424776  | 89424887 | TAGAGTTCCAAATCCGGACG        | GAGGAACATAAAAAGTGCACGA     | 2                | Yes                  |
| Ai02B20363 | Araip.B02  | 89461067  | 89461278 | TTTTTATGACGCCTGAAACAAG      | TTTGTTATAATGAGTAAATATTGCC  | 2                |                      |
| Ai02B20508 | Araip.B02  | 89993038  | 89993143 | CCCGGATTTGATGAGTTAGC        | CTGCTTCAACGAAGACGATG       | 2                | Yes                  |
| Ai02B20641 | Araip.B02  | 90529672  | 90529780 | TTTTCTCCATTTATTTCAATTACG    | AGCGCGTGTACATGCTTTTT       | 2                | Yes                  |
| Ai02B20920 | Araip.B02  | 91536337  | 91536473 | CCACAAACACCTCTCAACC         | CGATGTTGCCATGTCTTTTT       | 1                |                      |
| Ai02B21252 | Araip.B02  | 92635211  | 92635330 | GAGAGAGAGGAAGGGGGAGA        | CCACATTTTGGTTAACCTGTTT     | 0                |                      |
| Ai02B21379 | Araip.B02  | 93088601  | 93088741 | AACGTCCAATCAATAAACCAA       | GGTTGGTCCAAGCTCAAGAA       | 2                | Yes                  |

| ID         | Chromosome | SSR_start | SSR_end   | FORWARD PRIMER (5'-3')  | REVERSE PRIMER (5'-3')     | Bands in parents | Polymorphism in RILs |
|------------|------------|-----------|-----------|-------------------------|----------------------------|------------------|----------------------|
| Ai02B21536 | Araip.B02  | 93571581  | 93571713  | TGCGCATTAAATGAGAGTGAAA  | GAAGAAGAAGGAACGCGAAA       | 2                | Yes                  |
| Ai02B21538 | Araip.B02  | 93573643  | 93573775  | TATCAGGCGCGTTACACATC    | GAAGAAGAAGGAACGCGAAA       | 2                | Yes                  |
| Ai02B21744 | Araip.B02  | 94098826  | 94098941  | GGATTACGCCCAAACGTAAG    | TGTTGGCATACAGGTTGCAT       | 0                |                      |
| Ai02B21859 | Araip.B02  | 94600519  | 94600656  | TGGGATCGAGGAAGAAAATG    | TGGAAGGATGGAAGACACC        | 1                |                      |
| Ai02B22025 | Araip.B02  | 95015394  | 95015525  | TTCCTTCGCCTTTGTTATGG    | AGATAGAAGTGTGTTAAATGTGGGT  | 2                |                      |
| Ai02B22379 | Araip.B02  | 95977247  | 95977360  | CTCCGTACGATTTTGATCCC    | GAAGAAGAAGATGAAAAAGATGTGAA | 1                |                      |
| Ai02B22681 | Araip.B02  | 96841409  | 96841510  | ATTCCCAACGTTTCTCTCCA    | CACAGGAGCAAAAATGTCCA       | 2                |                      |
| Ai02B22742 | Araip.B02  | 96989358  | 96989483  | ACCTTTCCATGCAACTGGAG    | TATGAATGAACCACATGGCA       | 1                |                      |
| Ai02B23003 | Araip.B02  | 97717005  | 97717160  | TCGTCCTCAGCACTTTCGTA    | ACTTGTGCCTGCGACAAAAT       | 1                |                      |
| Ai02B23178 | Araip.B02  | 98309901  | 98310005  | TTTTCTCTGCAAATTTAGGCAT  | GCATTGTGTACGGCGAGTATT      | 1                |                      |
| Ai02B23281 | Araip.B02  | 98575352  | 98575468  | TTGCACATGAGACAAAATGAAA  | ATAGAGAAGCTCGGCCTCAA       | 2                | Yes                  |
| Ai02B24043 | Araip.B02  | 100653063 | 100653240 | GTCGGGTTGAGAGATACCGT    | TTGGCCAAAACCTTAGCTTAC      | 1                |                      |
| Ai02B24181 | Araip.B02  | 101074300 | 101074456 | TTTCTCACCTCTCCCTCACC    | GAGAGAAAGAAGGGAAGGGG       | 0                |                      |
| Ai02B24182 | Araip.B02  | 101074760 | 101074903 | AGATCGGAGGAGGAGGAGAG    | TCATTCTCTCTCCCATATCCCT     | 0                |                      |
| Ai02B24289 | Araip.B02  | 101334387 | 101334493 | GGATACACCCACCATGGTCTA   | GGAGTGAGACCCACCCTTTT       | 1                |                      |
| Ai02B24445 | Araip.B02  | 101857948 | 101858074 | GAGTGAGTCTTGGTGTAAGGCA  | TGAACGAGAGAGAGCAGAACA      | 1                |                      |
| Ai02B24516 | Araip.B02  | 102037715 | 102037829 | CAACAGCATGGTCATCCATT    | TTCAACGTTTTTATCACGACAGA    | 1                |                      |
| Ai02B24599 | Araip.B02  | 102269863 | 102269993 | TGCAGAAACATTGAGAAGCAG   | CCATTGAAGAATCTCGCCAT       | 1                |                      |
| Ai02B24624 | Araip.B02  | 102317872 | 102317981 | CCAAACTGGTTTGCTTGAAA    | ATTCGGTGTTCCTCATCACA       | 1                |                      |
| Ai02B25013 | Araip.B02  | 103239963 | 103240075 | GGGGAACTAATGATTGGTGTG   | TCCCTATTTTCCCCAAAACC       | 2                | Yes                  |
| Ai02B25046 | Araip.B02  | 103280778 | 103280879 | TGAGTGTGTGTGGAATGAAGG   | TGTTGATCAATACTGTGTATCTTT   | 1                |                      |
| Ai02B25100 | Araip.B02  | 103451101 | 103451224 | TGTTTTTCAGATGCAGGTCTG   | CAAGCTCCAGAAAGGTCTGAG      | 2                | Yes                  |
| Ai02B26210 | Araip.B02  | 106171310 | 106171420 | AGCGTAACTACACGCGCC      | GAGGAAGAAGAACGTGCAGC       | 1                |                      |
| Ai02B27181 | Araip.B02  | 107928583 | 107928691 | CCACCGCGTACTAATAGGGA    | CTTGGTTTTCGCAGGTTGAGT      | 2                |                      |
| Ai02B27634 | Araip.B02  | 108725072 | 108725179 | CACGTTGAAATTGTTAGGTTTGA | GTTGTCAAATTTGCGAGCCT       | 2                |                      |
| Ai03B1163  | Araip.B03  | 2683684   | 2683807   | TGAGGATGCAATTCCTTAGTG   | GGCGGTGAAGATATTGGAAC       | 1                |                      |
| Ai03B1991  | Araip.B03  | 4155636   | 4155747   | GGATCCAAGTGAGGCACATT    | TCACTGAGTTCGTTTCGTTTCG     | 1                |                      |
| Ai03B3140  | Araip.B03  | 6587997   | 6588099   | CACAGTTTCAACGGCAATGT    | CCAAAAATTCGTACATGTATCA     | 1                |                      |
| Ai03B3342  | Araip.B03  | 7020603   | 7020775   | CAAATCAATCCCCAACTTTCTC  | CATAATAGTCCCCCGTCCAA       | 1                |                      |
| Ai03B4381  | Araip.B03  | 9503066   | 9503248   | AGATGGGTTGCTGCTGTAGG    | CGCATCGCTTCTCTCTCTTT       | 1                |                      |
| Ai03B6104  | Araip.B03  | 14034441  | 14034625  | GCTCTCCCTCTCTCTCACTCA   | GGTTCGAGTCTCCTATCTTTTCG    | 1                |                      |
| Ai03B6119  | Araip.B03  | 14091298  | 14091405  | GCAACAGAGAGGAGAATGTGTG  | GGCCAATTTTAAGGGCTAGG       | 1                |                      |
| Ai03B6448  | Araip.B03  | 15016298  | 15016398  | CATTGAAACAAGAGATTGGATTT | TGATTACATTTGACACAGG        | 1                |                      |



| ID         | Chromosome | SSR_start | SSR_end   | FORWARD PRIMER (5'-3')      | REVERSE PRIMER (5'-3')      | Bands in parents | Polymorphism in RILs |
|------------|------------|-----------|-----------|-----------------------------|-----------------------------|------------------|----------------------|
| Ai03B8833  | Araip.B03  | 22185519  | 22185732  | AGACAAGGGATAGAGAAAGAAAGAC   | CAAAACCTAATTTCAAAACCAAA     | 1                |                      |
| Ai03B9630  | Araip.B03  | 25032569  | 25032680  | TTTCTCCCCTCTCCCTCG          | GAGAAAAGAGAAAAAGAAAGGGAA    | 1                |                      |
| Ai03B10088 | Araip.B03  | 26590789  | 26590914  | TGACAATCGCAATTTCAAGG        | AAATACAAAAACAATGCACAAAAA    | 0                |                      |
| Ai03B10105 | Araip.B03  | 26631151  | 26631352  | GCACGTAAATGAAGAAGGAGAAA     | ACTGCACGTTTTCACTGCAC        | 1                |                      |
| Ai03B10865 | Araip.B03  | 29429667  | 29429774  | TTTCACTTTCATACACACAATCAA    | TGGTTGGTTCTCGTAATAATTTCT    | 1                |                      |
| Ai03B11430 | Araip.B03  | 31731107  | 31731250  | TCGGCCAAAGGGAAATAAAT        | GGGTAGGATGTAAGACCCCAA       | 2                |                      |
| Ai03B12091 | Araip.B03  | 34651698  | 34651835  | CGTGCAAGAAGAAGAAGAACG       | ACGAATAAACCCCAAAAACG        | 1                |                      |
| Ai03B15214 | Araip.B03  | 48140478  | 48140617  | CCTTTGTAAAACCTCGAAACCG      | TGTCTGTGTCTGTGTGTGTGC       | 1                |                      |
| Ai03B18080 | Araip.B03  | 56260118  | 56260263  | GAGAGAGAATGGAAGGGGAGA       | GGTTAACCAAAACCAAAACCAA      | 1                |                      |
| Ai03B20724 | Araip.B03  | 72473375  | 72473490  | CTAAAATTCACGGCCTCCAG        | TGGTATTTGAGGGTTTGGATG       | 1                |                      |
| Ai03B20837 | Araip.B03  | 73091893  | 73092025  | TTTTTATCATCATCATCATTCATCA   | AAAACACGTGCGCAACAAT         | 2                |                      |
| Ai03B22384 | Araip.B03  | 81966072  | 81966206  | TTTGGTTAGATTGAACTTTATTTTGAA | GATACGGAGGAAGACGACGA        | 0                |                      |
| Ai03B22494 | Araip.B03  | 82599625  | 82599735  | AGAGGGATCAAGTGTGGACG        | TGCAAATATCTTGTAATCCCA       | 1                |                      |
| Ai03B23146 | Araip.B03  | 86061602  | 86061712  | TAACATGGATAGCCCAACGC        | TGAACTATTAATAATGGACAAAAGTG  | 1                |                      |
| Ai03B23157 | Araip.B03  | 86100397  | 86100499  | CGAATCTGGATAGGCAGAGC        | ATCCTTCGACGTCCTTACGA        | 1                |                      |
| Ai03B26132 | Araip.B03  | 103345661 | 103345791 | GAAGTCGCGTCACACTCGTA        | CGCATGTATATTTTGTATTTTCCC    | 1                |                      |
| Ai03B26555 | Araip.B03  | 105401636 | 105401740 | TGTCAATTTTTAAGGACGAAAAT     | TGTTCTCAAATGTTTTCGTTGG      | 1                |                      |
| Ai03B27046 | Araip.B03  | 107790866 | 107791088 | CGTCATGGAGGAGGGAGTCT        | ATTGCCATGGCCAAGAAC          | 1                |                      |
| Ai03B27999 | Araip.B03  | 111679332 | 111679451 | CATGCTAAATTGTGGCACATAG      | GCGGACGAGCTACATACCAG        | 0                |                      |
| Ai03B28258 | Araip.B03  | 112775636 | 112775774 | TATACACATGCAGGACCCCA        | AGGAAAAGACACAACCACTGTCT     | 1                |                      |
| Ai03B28386 | Araip.B03  | 113419730 | 113419869 | TTCTTTTTCTTCTTCCCGCC        | CCAAAAATTTACAAACAAATCA      | 1                |                      |
| Ai03B28927 | Araip.B03  | 115761914 | 115762019 | TTGTTGCAGACAACATAAGAGTAGC   | TCTTTCTAAATGAAGTAGGTCGCA    | 1                |                      |
| Ai03B29470 | Araip.B03  | 117806690 | 117806791 | TTTTTCGCTCCAAAATGGTC        | CACAACAAATTTCAACAAAAGCA     | 0                |                      |
| Ai03B30116 | Araip.B03  | 120028313 | 120028414 | GCCAGCTCTAAGCGAGGTAA        | ACGAAATCAATTCTGGCACA        | 1                |                      |
| Ai03B30551 | Araip.B03  | 121403666 | 121403792 | TGGTAAAGGAATGAGTTTGGGT      | AAAGGTCATGAGTTCAAATTTTATT   | 1                |                      |
| Ai03B30911 | Araip.B03  | 122397341 | 122397455 | CCGGAGTAGAGGAGCAGAAG        | GCTTAACGCCTCACCCATAA        | 1                |                      |
| Ai03B32338 | Araip.B03  | 126266952 | 126267116 | TGCATTGCATTATTTTGTGAA       | CATCAGGGTCGATTTTCGATT       | 2                | Yes                  |
| Ai03B33186 | Araip.B03  | 128224874 | 128225080 | TTCATGCGGCTATTATTTTCTC      | TAGCGACGATGACGACTGAC        | 2                |                      |
| Ai03B33341 | Araip.B03  | 128754974 | 128755099 | CCCACCCAAATCCCCTATAC        | TTTTATGGTAAAATTGTTAGAACGTCA | 2                | Yes                  |
| Ai03B34328 | Araip.B03  | 131271231 | 131271353 | TGTTGAAGATGATGATAACGAAAGA   | TATACACGCGCACACGTTTT        | 1                |                      |
| Ai03B34812 | Araip.B03  | 132692883 | 132693020 | GCTCTTGGTATTTATTGCTCGC      | GCAGCATATTGCCCTATTCC        | 1                |                      |
| Ai03B34889 | Araip.B03  | 132856920 | 132857036 | TGCTTTTAATTTGGTGCGTG        | TGTGCAGAGAAGAGTAGACCCA      | 1                |                      |
| Ai04B16    | Araip.B04  | 66229     | 66445     | ATGACCATCACTGCTCCACA        | GGACTGGGATTGCATAGAA         | 2                | Yes                  |

| ID         | Chromosome | SSR_start | SSR_end   | FORWARD PRIMER (5'-3')     | REVERSE PRIMER (5'-3')      | Bands in parents | Polymorphism in RILs |
|------------|------------|-----------|-----------|----------------------------|-----------------------------|------------------|----------------------|
| Ai04B1445  | Araip.B04  | 3763755   | 3763872   | AGCCAAACAACACAAGAGGG       | TTCCTTTGAGCCTTTGCACT        | 0                |                      |
| Ai04B2241  | Araip.B04  | 5799828   | 5799928   | TTCGACCATGTGAATGAAGC       | GCCCGGGCTCTAACCTTAAT        | 2                | Yes                  |
| Ai04B2635  | Araip.B04  | 6905276   | 6905423   | CGAAGGACTTCCTTTTGTGC       | GCTTCAATTTTCAGATTTCTGCTG    | 0                |                      |
| Ai04B3132  | Araip.B04  | 8194033   | 8194199   | GCCTAATAGTCCAACACAGCC      | CGAAAAAGTGGAACCTGGGA        | 1                |                      |
| Ai04B3484  | Araip.B04  | 9226523   | 9226692   | AAACGATTTTCAGAGCTTGATG     | CCACATACTGTTACGGCACG        | 1                |                      |
| Ai04B4849  | Araip.B04  | 13502425  | 13502530  | GTGCTTTTTGCAGGTTCTCC       | TTGAGATGGCAAGGTATTACGA      | 2                | Yes                  |
| Ai04B5273  | Araip.B04  | 15012262  | 15012408  | GCGAATGCAATAAAGGAAAA       | GACGCTTATGTGTGGATTGC        | 2                |                      |
| Ai04B5526  | Araip.B04  | 15902137  | 15902251  | CACGCGCCTCATATAACGTA       | AACGCAAACAGAGGAGAACAA       | 2                | Yes                  |
| Ai04B5942  | Araip.B04  | 17349539  | 17349652  | TTTTCTGCTGCGGAAGCTAT       | CCTCACCCCTGTATGTGAC         | 1                |                      |
| Ai04B7769  | Araip.B04  | 25638706  | 25638815  | GCATGAACCTTTTTCATCTGG      | TTTGTGCATACTGGGCTTCA        | 2                |                      |
| Ai04B8073  | Araip.B04  | 26841348  | 26841463  | TCTGCCACTCCTTCTCTGGT       | AACACAACCTTTATTCGGCCA       | 0                |                      |
| Ai04B9397  | Araip.B04  | 33208563  | 33208728  | CCAAAGAAGTTGCAATGACG       | CTCCGCTTAAGAGCAGAGC         | 2                | Yes                  |
| Ai04B9499  | Araip.B04  | 33748747  | 33748878  | AAAACATGAAGATCAATCAAGAAGG  | AAATATAATGCATGTATCGTGTAGACC | 2                |                      |
| Ai04B9972  | Araip.B04  | 36640947  | 36641085  | CCGGTTAACCAAAAACCAAAA      | ATGAGAGAGAGAGGGGAGGG        | 1                |                      |
| Ai04B10462 | Araip.B04  | 39325861  | 39325964  | CGTGTGGGTTATGTTATTTTGAA    | CCCCTCTGTTCTAGAACCTT        | 1                |                      |
| Ai04B12760 | Araip.B04  | 52113951  | 52114105  | TTTCTCTCCCCCTCCTCTTC       | AGGGGAGAAATATGGGAAGG        | 1                |                      |
| Ai04B12763 | Araip.B04  | 52115149  | 52115273  | AAGGGAGAGAGGGGGAAGA        | CCTCCAATCTCTTTTTCCCTA       | 2                | Yes                  |
| Ai04B13474 | Araip.B04  | 57075528  | 57075645  | ACAGAAGCTCTGGGTTGCAT       | CAGAGAAAAGAAAAACCAGAACA     | 2                |                      |
| Ai04B15745 | Araip.B04  | 72870571  | 72870679  | AAAATAATGGAGAATCCATGTGC    | TGCCTAGCTATCCATAATTCCC      | 1                |                      |
| Ai04B16305 | Araip.B04  | 76412897  | 76413009  | TGTTTCTTAACCTTTTCAAACTACCT | GGGCAGAGATGTGAGATGAGA       | 1                |                      |
| Ai04B17014 | Araip.B04  | 80204142  | 80204288  | GAAAGGAGGGGGAGAGAAAA       | CCCTCCTTCCCCTCTCAC          | 0                |                      |
| Ai04B17746 | Araip.B04  | 83859814  | 83859925  | GAAGAAAACCTGCGTGTGC        | TTAAATCACGCGCTCCTTCT        | 2                | Yes                  |
| Ai04B18016 | Araip.B04  | 85608832  | 85608933  | TGGAAACTTTGGTTGATGAGG      | AACATTGGGGTAATTTTGTCC       | 1                |                      |
| Ai04B18107 | Araip.B04  | 86386158  | 86386273  | TGAAATATATGCGCCCAACA       | GCAAAGAAGAAGGCCAAGAA        | 1                |                      |
| Ai04B18767 | Araip.B04  | 90378765  | 90378876  | CTTTTTGCCCAAGTGGAGAG       | TTTCGAAAATTAACCTTTTTTCA     | 1                |                      |
| Ai04B19238 | Araip.B04  | 93246956  | 93247070  | CATTTTGGGGTTTACTTTTGG      | ACTAGGGCTGTCCGGAGAAT        | 2                | Yes                  |
| Ai04B19908 | Araip.B04  | 96497885  | 96498012  | AATGAACTGCAACGCAATG        | CCCGTATCCACCTTTCTCCT        | 2                |                      |
| Ai04B20539 | Araip.B04  | 99203646  | 99203783  | AACAGCAAATCCTGCCTCAT       | CCATTTTCGTTACAAAAGTGCAA     | 2                | Yes                  |
| Ai04B20695 | Araip.B04  | 100015080 | 100015190 | TTTGGGGTATTTTGTCCCCT       | TGGTTGGGATAAAAAGGGTGT       | 1                |                      |
| Ai04B23475 | Araip.B04  | 111621458 | 111621601 | TGGGCTTTC AACCCAAATAA      | GTCCCTTTTTCACTGGTTCG        | 2                |                      |
| Ai04B23931 | Araip.B04  | 113027725 | 113027843 | TCTCTTCTTCCACTCTCTTTCA     | AAAAGGGGAAAAGCAAAGG         | 1                |                      |
| Ai04B24958 | Araip.B04  | 116693175 | 116693305 | TTGTGCACGTAATAATGGAGC      | TTTAATCAAATCCAACCAAATTGT    | 0                |                      |
| Ai04B25623 | Araip.B04  | 119169187 | 119169330 | CTCCTAACTCAGCCCTCGAA       | GGACTTCTGAAGCGAAGTGG        | 1                |                      |

| ID         | Chromosome | SSR_start | SSR_end   | FORWARD PRIMER (5'-3')      | REVERSE PRIMER (5'-3')      | Bands in parents | Polymorphism in RILs |
|------------|------------|-----------|-----------|-----------------------------|-----------------------------|------------------|----------------------|
| Ai04B27696 | Araip.B04  | 125353243 | 125353351 | GAGGGCTAACACTACAAAAATCG     | GTTTAGTGCGGATTGGATCG        | 1                |                      |
| Ai04B28049 | Araip.B04  | 126309018 | 126309165 | AATTGGTGGTGTGGTGGTG         | AAATGGTCCCCAAAGTTTCA        | 1                |                      |
| Ai04B28641 | Araip.B04  | 127883491 | 127883664 | AAACTCATATTTTGAAATTTTGACC   | TCGATCTATTAACGAGTGATTGC     | 2                |                      |
| Ai04B30470 | Araip.B04  | 132244886 | 132244985 | TTGAAACAATCGAAGAATCCG       | TAAGTTTTAGCGCATGCCAG        | 1                |                      |
| Ai04B30796 | Araip.B04  | 132924612 | 132924764 | GGATCAAGAGGAGACAGGGA        | TTTCCTTCTTATCCTACGCACC      | 1                |                      |
| Ai04B30953 | Araip.B04  | 133269112 | 133269221 | AAAAAGTGTGTCTTCAGTCATGTA    | ATCACAGGTTCAATCAGGGC        | 1                |                      |
| Ai05B1430  | Araip.B05  | 2961936   | 2962041   | TTTTAATTGTCCTGTTTTAACAACTTT | TCTTGGACAGCCATCATAACG       | 0                |                      |
| Ai05B2659  | Araip.B05  | 6021286   | 6021444   | GCGTAAACTCTATGTGGTAGGATG    | TTTTGGATATAGCGTCACAAAAA     | 0                |                      |
| Ai05B4675  | Araip.B05  | 12019265  | 12019487  | TTTTCAAAGCGCTACACTCA        | TTCAGAACTATGAAAATCGAAAAA    | 1                |                      |
| Ai05B4933  | Araip.B05  | 12754807  | 12754933  | GGGAAGAGAAACAACAAAGCA       | GAGGTGCGATTTATCGGAGA        | 1                |                      |
| Ai05B5265  | Araip.B05  | 13802774  | 13802995  | CACGCACTAGATCTTCTTCTCC      | TGTTGGTGATGATGATAATGGAA     | 2                | Yes                  |
| Ai05B5809  | Araip.B05  | 15475405  | 15475531  | AAAGGAGCGAAAAATACGCA        | CTCGTTTTGCACGTGTGTCT        | 1                |                      |
| Ai05B6490  | Araip.B05  | 17760885  | 17761014  | AAATCCTTCAATCATATTCATTACCTT | TTGGACATTCAAATTATGTAAGTTTTT | 0                |                      |
| Ai05B8601  | Araip.B05  | 25547746  | 25547851  | TCGCAGAACTAAAACAGACGTT      | ATGCCAAGAAGAAGAAGCGA        | 1                |                      |
| Ai05B8834  | Araip.B05  | 26466006  | 26466106  | CTGATCGCCTGCCAAAAA          | TTGGATCATCCTCAATGGGT        | 1                |                      |
| Ai05B9660  | Araip.B05  | 29550263  | 29550374  | GACGAGAAACCTTCCCATGA        | GACGAACTTGCCCAAATACC        | 2                | Yes                  |
| Ai05B10202 | Araip.B05  | 31763287  | 31763472  | TTCTTCAAAAACGATTTTCAGAGC    | CCACATACTGTTACGGCACG        | 1                |                      |
| Ai05B12077 | Araip.B05  | 42226478  | 42226595  | CAATGGATCGCCCTAAAAGA        | TTTTTGCATCGTACCTTGTTT       | 2                | Yes                  |
| Ai05B12424 | Araip.B05  | 44197871  | 44198029  | GAAGGAGAAAGAGAAGGCAAGA      | TCACGATTCTTATCCCTCTTACAA    | 1                |                      |
| Ai05B12488 | Araip.B05  | 44473244  | 44473398  | GGGACGATTTTTGGTGTGAT        | TGCAAATAAAATGTGATCCACG      | 2                |                      |
| Ai05B12998 | Araip.B05  | 47302166  | 47302276  | TCGAGTCCTCGCCTAAAATG        | GGCGATGTTGGTATTCCACT        | 1                |                      |
| Ai05B15046 | Araip.B05  | 62061041  | 62061171  | CGCCCACTGACTTCCAAATA        | TATTGACGGCGATTACGGTT        | 2                | Yes                  |
| Ai05B15820 | Araip.B05  | 67083675  | 67083811  | TCTCCCCCTCCTCTCTCTTC        | AAGAGGGAGAGAAACAAAGACA      | 2                |                      |
| Ai05B16037 | Araip.B05  | 68458664  | 68458825  | CCTTGTCTCTTCTCGCATTTT       | TCGTTCAACTGATTTGGAGTT       | 1                |                      |
| Ai05B16421 | Araip.B05  | 71469775  | 71469890  | CAAAAACCGTCATGAACAA         | TGTTTGCATATATTTGGTTTTGC     | 0                |                      |
| Ai05B16553 | Araip.B05  | 72466510  | 72466618  | TTTCATGCCCAATAAACGAG        | TCTCTGTATTGTTAGTGACGTTGTT   | 0                |                      |
| Ai05B17996 | Araip.B05  | 83079063  | 83079236  | AGAGGGATCAAGTGTGGACG        | TGCAAATATCTTGTGATCCCC       | 1                |                      |
| Ai05B18121 | Araip.B05  | 83963084  | 83963196  | TGTTTCCCTCGCCTTTATCTT       | AACCGCATAATCTTTCAAAAACA     | 1                |                      |
| Ai05B18201 | Araip.B05  | 84625128  | 84625229  | GCTTTATTTTGCATTTGGGG        | TGGGAAACCTATTGGGAACA        | 1                |                      |
| Ai05B19112 | Araip.B05  | 91071913  | 91072027  | GGATTTGGGAACGTATTCATGT      | CGTCTTGGGGTTTCTTTGTC        | 1                |                      |
| Ai05B19615 | Araip.B05  | 94540034  | 94540213  | TTCCACAACAAATTTACAAAAA      | TTTGCTACAAAATGGTCCCC        | 1                |                      |
| Ai05B19811 | Araip.B05  | 95636365  | 95636515  | GGGAAATGTAGGAGGGAGA         | TACCTTACCCCAACCCCTTC        | 2                | Yes                  |
| Ai05B20237 | Araip.B05  | 98304893  | 98305098  | GAATTTCAAAGGGGTAGGACTTG     | CAAACCTAAGGCTGACCGGA        | 0                |                      |

| ID         | Chromosome | SSR_start | SSR_end   | FORWARD PRIMER (5'-3')      | REVERSE PRIMER (5'-3')      | Bands in parents | Polymorphism in RILs |
|------------|------------|-----------|-----------|-----------------------------|-----------------------------|------------------|----------------------|
| Ai05B21629 | Araip.B05  | 106899075 | 106899181 | AGAGGAGGGGGAGAAGAATG        | TCCCCTCACCTCTCTTTGTC        | 0                |                      |
| Ai05B21706 | Araip.B05  | 107241755 | 107241856 | AAGAGGGATAGGAAATTGATTATGT   | CTCAGCTATAGCACAAGCGG        | 1                |                      |
| Ai05B22435 | Araip.B05  | 111734740 | 111734882 | CACAAATTCAGCCCAACAGA        | TTTTATTGATTGTTGATTGATTGAA   | 1                |                      |
| Ai05B22619 | Araip.B05  | 112483731 | 112483874 | CAAGCTGAAGGCTTCCAAAG        | TGAAATGAGCAAGATGAACGA       | 2                |                      |
| Ai05B25638 | Araip.B05  | 125704397 | 125704513 | GGATTGAAGGCTTGAAGCTG        | CCGCTAGTTTCTCTGTGCTGCT      | 2                | Yes                  |
| Ai05B25831 | Araip.B05  | 126380630 | 126380734 | CGCATGAGAGGGGAGTAAAA        | TGATCAATTTCCATGGCTGA        | 0                |                      |
| Ai05B26240 | Araip.B05  | 127639989 | 127640177 | TCAAGAATACTTTCATGATATGAGGTT | TGCTAATGTCTCCTTATCTAACGATTT | 1                |                      |
| Ai05B26922 | Araip.B05  | 130005159 | 130005329 | GTGTTGGTGCATGATAACG         | AAGTCCAACAAGTCATTTACTCA     | 2                | Yes                  |
| Ai05B27169 | Araip.B05  | 130691293 | 130691424 | CATGGAGGAAGAGGAAGTCG        | CCAAAGCACTACTCACCG          | 2                |                      |
| Ai05B27759 | Araip.B05  | 132542299 | 132542440 | CACACTCAAACACTCTAAATCC      | GAAAAAGAAAATCTGTTGCTAAAAA   | 0                |                      |
| Ai05B28050 | Araip.B05  | 133533188 | 133533290 | AAATATCCGCCGGTAAATCC        | AATGGTGGCAGAGGCAATAG        | 2                | Yes                  |
| Ai05B28771 | Araip.B05  | 136054612 | 136054722 | ACTGCACGTTTTACTGCAC         | GAGAAAGAGAATGCAAGAAACGA     | 1                |                      |
| Ai05B28787 | Araip.B05  | 136106424 | 136106555 | TCAAAAAGTCGAACAATTTGTGAT    | CAAGAAAGAGGATTATGGATAGCAA   | 2                |                      |
| Ai05B32361 | Araip.B05  | 145894732 | 145894839 | AGGGACGGAAGATGGGTATC        | AGAGTGTGTGGGGAGTGAGG        | 2                | Yes                  |
| Ai05B32370 | Araip.B05  | 145909762 | 145909887 | GCTGGCTCATTGTTGTTGAA        | GGCCATTTGATTTGCAGAGT        | 1                |                      |
| Ai06B357   | Araip.B06  | 776402    | 776546    | TCATTTTGTTCCTTATTTTGGGA     | GATTGCCAGCGTGGATAAGT        | 1                |                      |
| Ai06B632   | Araip.B06  | 1247546   | 1247730   | CCTCTTTCAGTAATTTTGCAGC      | CTCTTCTTCTCCCTCTCCC         | 1                |                      |
| Ai06B739   | Araip.B06  | 1487910   | 1488013   | TTTTTAATGTTTGTGCGATAATAA    | CCGACATGATGATTAAATTTGAG     | 1                |                      |
| Ai06B935   | Araip.B06  | 1979928   | 1980089   | AACCAGATCCAATTCGTGTTT       | GTGCAACTTCACGAATCACC        | 1                |                      |
| Ai06B3856  | Araip.B06  | 9691939   | 9692045   | CCTTTTTGTTTTACCTTTTCAAGTG   | GGTGCCTGATTTTAGTGGTTG       | 1                |                      |
| Ai06B4862  | Araip.B06  | 13155036  | 13155236  | AAAAAGCCGACACCACCG          | TCAAACAATAATACTCAGAATCAGAAA | 1                |                      |
| Ai06B5104  | Araip.B06  | 13912038  | 13912169  | AGCTCAAAAACATGATCCACAA      | ATCGGCATTTTTGGGTGAC         | 1                |                      |
| Ai06B6024  | Araip.B06  | 17022586  | 17022746  | GCACGTTCTTCTTCATGCTG        | GGAGGAAAAGGAAGGAGGAG        | 1                |                      |
| Ai06B6479  | Araip.B06  | 18613379  | 18613495  | GGACTAACAGAGCGACAGGG        | AATTTTCAAGCGCAAACACT        | 1                |                      |
| Ai06B6657  | Araip.B06  | 19283774  | 19283904  | TTTCTTCTTTGAGAGACGTG        | TCAATCACCAACCCACAC          | 1                |                      |
| Ai06B6681  | Araip.B06  | 19371494  | 19371594  | GTCCGATGGTAAATTCGACG        | GTAGTGAAGGCGACACCGAC        | 1                |                      |
| Ai06B7451  | Araip.B06  | 22278964  | 22279132  | CATCAACATAGCAAAAATTCAACA    | ATCGTTACTGTTGTGCGCCAT       | 2                | Yes                  |
| Ai06B8399  | Araip.B06  | 26191497  | 26191601  | TTCACTTTGGGGCATTTTGT        | TGGGTAAACACTCATGCATTCT      | 0                |                      |
| Ai06B8780  | Araip.B06  | 27913230  | 27913333  | TCATCCGTTTTGGAGGAAAG        | TCGAAAATCTTCACCCATTTTT      | 1                |                      |
| Ai06B9021  | Araip.B06  | 28985373  | 28985532  | GGGAGGCAATCTGATGTTTT        | TTTTTAACATTCTGCATGACCAA     | 0                |                      |
| Ai06B9106  | Araip.B06  | 29417919  | 29418090  | TTCTCTTCAGGCTTCTGTTT        | AAGGTGGTACGACTCTCAGGT       | 1                |                      |
| Ai06B9693  | Araip.B06  | 32141773  | 32141877  | TTGAAAATATTGGGAATTGGG       | GGCATTTTTGTCCCCTTTTT        | 1                |                      |
| Ai06B10201 | Araip.B06  | 35317173  | 35317396  | AATATCCTTCGGCCATTTTT        | GTTCTTTTTCTCTTCTTCAC        | 1                |                      |

| ID         | Chromosome | SSR_start | SSR_end   | FORWARD PRIMER (5'-3')      | REVERSE PRIMER (5'-3')     | Bands in parents | Polymorphism in RILs |
|------------|------------|-----------|-----------|-----------------------------|----------------------------|------------------|----------------------|
| Ai06B10907 | Araip.B06  | 38741300  | 38741401  | AGTCGATGTGGCGAGGTATT        | GTGATGCGATTTCAATTTTCG      | 1                |                      |
| Ai06B11788 | Araip.B06  | 43810546  | 43810687  | CAGAAAGCTCAAACGCACAG        | GGATTTTGAGCTCCTTTTGG       | 1                |                      |
| Ai06B13545 | Araip.B06  | 55862832  | 55862937  | AGCCAATGCCAGTAGCTTGT        | CGTAATTAGTCTGGCCCCAT       | 2                | Yes                  |
| Ai06B15732 | Araip.B06  | 65481970  | 65482069  | ATTAAGCGGTGATGTGGAGG        | CATGAAATGCAATGCAAACC       | 1                |                      |
| Ai06B15782 | Araip.B06  | 65855058  | 65855167  | TCGAGAGGCACCTCACTAGG        | TCCTAGACCTCCATCAAGCC       | 1                |                      |
| Ai06B16693 | Araip.B06  | 71767262  | 71767433  | AAACCTAATGTGTGAATAAATGAATGA | AAAAGCAGGTGTTACTTTGTGC     | 1                |                      |
| Ai06B18381 | Araip.B06  | 82405381  | 82405508  | TTTGTCCCATGTGCATTGAT        | TCCCAAGTTGAATCCTTGGT       | 1                |                      |
| Ai06B18690 | Araip.B06  | 84504597  | 84504731  | GCTATTATGCTCCCCTCTGC        | TGAAATTGGGAGTGGTTGGT       | 2                |                      |
| Ai06B19288 | Araip.B06  | 87663816  | 87663957  | TTGAAAATAAAAAGGAAAGGAGGA    | TTCCGACAGAACGAGAGGTT       | 2                | Yes                  |
| Ai06B19579 | Araip.B06  | 89103959  | 89104146  | TTTATGAGTCAAATCAAATTTTCAA   | TTGAAAAGAGGGAGATATTTTCG    | 1                |                      |
| Ai06B19719 | Araip.B06  | 89761713  | 89761821  | CGAATCTGGATAGGCAGAGC        | ATCCTTCGACGTCCTTACGA       | 1                |                      |
| Ai06B20094 | Araip.B06  | 91720879  | 91721010  | GTGCTTTGGGTGCTCATTG         | CATTTTCTTTTCAATTCAACCACA   | 1                |                      |
| Ai06B20411 | Araip.B06  | 93371428  | 93371538  | AGCCACCTTTGGCTTTTCTT        | AGGCAATACTTGCAACGAGA       | 1                |                      |
| Ai06B21393 | Araip.B06  | 98898478  | 98898591  | TGGAGTTATACAAAGGCTTGTGC     | TTTCAATTATTATACATTTCTTGCTT | 1                |                      |
| Ai06B21543 | Araip.B06  | 99741561  | 99741692  | TTTCTCCAACCTTTTGGTGC        | ATGATGAATCATGGACGACG       | 1                |                      |
| Ai06B21949 | Araip.B06  | 101792114 | 101792253 | TTCCACTTAGATCCATGACGG       | TCCTTACCCTTTCTCTCCCC       | 1                |                      |
| Ai06B22126 | Araip.B06  | 102631128 | 102631259 | CACCAACATCAACCACAACC        | GTTTCCTGCTTTCTTGGTGG       | 1                |                      |
| Ai06B22307 | Araip.B06  | 103402903 | 103403003 | CGAAAATCACTAACCATTTTCAA     | GCCCAGGTATAGAGGTTCCC       | 1                |                      |
| Ai06B22668 | Araip.B06  | 104907584 | 104907695 | TGAAACCATAATTTTTATGAAACCA   | GGAGGAGAAAGAGAGGAAGGG      | 1                |                      |
| Ai06B22767 | Araip.B06  | 105373994 | 105374108 | AAATCGCGAAGACGTACCAC        | GTACCCTAGCCGGCCTAAAC       | 1                |                      |
| Ai06B23277 | Araip.B06  | 107693694 | 107693806 | CTCGCTATTGCTCAGTCCCT        | TGAAATGGTCGCTTGCAATA       | 1                |                      |
| Ai06B23527 | Araip.B06  | 108822360 | 108822495 | TGGAGATAGTTCAGCTTAGGAACA    | TCGGGTATTTTCATCGAGTCTTT    | 1                |                      |
| Ai06B24038 | Araip.B06  | 111051024 | 111051151 | AAAAACCAATTTCAAAGCCC        | ACCAAATCACAAAGGCCAC        | 1                |                      |
| Ai06B24686 | Araip.B06  | 113419536 | 113419659 | TCCCTTTACCACTAACCCCC        | TAATGGCGATGGTGTATGAGA      | 1                |                      |
| Ai06B24907 | Araip.B06  | 114347867 | 114347974 | CCGATCACTTTAGATCGGCT        | TTCTCTGGTTTATTATCCTCC      | 1                |                      |
| Ai06B25262 | Araip.B06  | 115667509 | 115667608 | AAAGGAAAACCAAAAATGATAAAAA   | TGCCATTCCAAAACATACA        | 1                |                      |
| Ai06B25720 | Araip.B06  | 117226047 | 117226191 | TGAGTGTGAGAGGAAGAGCAC       | AGAGAACCGGCGGATTTG         | 1                |                      |
| Ai06B25796 | Araip.B06  | 117500334 | 117500450 | CATGCTGGAGCAACTAACGA        | ATGGTTAAACCCAGCACAGC       | 1                |                      |
| Ai06B25918 | Araip.B06  | 117978633 | 117978764 | TCAATTTTCTCGATCATGCTG       | TCCTTTTTCGGTTAAGAGTCCA     | 1                |                      |
| Ai06B25928 | Araip.B06  | 117997856 | 117998062 | CCCCTCTCCCTCCTATCAAC        | CGAAAATTACAATGCAAATCG      | 1                |                      |
| Ai06B26745 | Araip.B06  | 120947923 | 120948048 | CTGGAGGAGCTCACATCCCT        | TGGAAGGAATCGGTTGAAAG       | 1                |                      |
| Ai06B27039 | Araip.B06  | 121912180 | 121912282 | AATTGTGGGTTTCGAGTCTCC       | TTAAGAAAAATGTGCGTGCG       | 2                |                      |
| Ai06B27348 | Araip.B06  | 123012639 | 123012809 | AAAAAGAGGAGAAACGCAAAGA      | GTGTCAACACGTGCGCTACT       | 2                |                      |

| ID         | Chromosome | SSR_start | SSR_end   | FORWARD PRIMER (5'-3')      | REVERSE PRIMER (5'-3')      | Bands in parents | Polymorphism in RILs |
|------------|------------|-----------|-----------|-----------------------------|-----------------------------|------------------|----------------------|
| Ai06B27638 | Araip.B06  | 124107889 | 124108027 | GGAGAAAGAGAGAGAAGAGGGC      | TGAACCAAACCTGCTTTGTCAT      | 2                | Yes                  |
| Ai06B29285 | Araip.B06  | 129091619 | 129091766 | TCAACCACACAACCTTTTCGAT      | CCACCTACTTGTCAATTAGGCAA     | 1                |                      |
| Ai06B29452 | Araip.B06  | 129552041 | 129552144 | GGGTCGTA CTCTCTTGCGTC       | GAAGAGAGCTTTGACGGTGG        | 1                |                      |
| Ai06B29531 | Araip.B06  | 129751769 | 129751891 | CATGGATGCCAATACCTTCC        | AATCAAACATCTCTAAACCCCC      | 1                |                      |
| Ai06B29598 | Araip.B06  | 129899861 | 129899975 | TGCTTTCTTGCTTTCTGCT         | CCACCAACATTACCACCACA        | 2                | Yes                  |
| Ai06B29716 | Araip.B06  | 130299166 | 130299324 | ATGCACTAAGCCACGTTTCC        | GTGAGATAAAATTGTAAGACTCCAAA  | 2                | Yes                  |
| Ai06B30789 | Araip.B06  | 132702877 | 132703002 | GCATTTGTTTTGAATGAACAAAGA    | AAGATCTGCCCTCATTTTG         | 2                | Yes                  |
| Ai06B31304 | Araip.B06  | 133809775 | 133809948 | CGCATACAAGCGATTAAGGC        | GAGGAAGAAGAACGTGCAGC        | 2                | Yes                  |
| Ai06B32416 | Araip.B06  | 135916057 | 135916209 | CAAGCCAAAACTCAGTCCA         | GCTCCATTTTGAAATCTCCG        | 2                | Yes                  |
| Ai07B99    | Araip.B07  | 258756    | 258855    | GCCAGTTGCCACCAAAGTTA        | AGATGGCATGCATAAACCGT        | 1                |                      |
| Ai07B1340  | Araip.B07  | 3236887   | 3237020   | GGGAGAGAGAGGGAGAGAA         | TCCTTCCATTGCTTTCGTTT        | 1                |                      |
| Ai07B1456  | Araip.B07  | 3560903   | 3561033   | ACCACACTCAAACACACCCA        | TTGTGTATTCCCTGCAACCA        | 1                |                      |
| Ai07B2047  | Araip.B07  | 4886239   | 4886365   | CTCCTTCTCCTTCCCCCTT         | GAGGAGAGAGGACAGAGAAACAA     | 1                |                      |
| Ai07B3006  | Araip.B07  | 7501433   | 7501562   | TTAATCGTGCCTCTGTGGTG        | TGTTTCGAATTAGTTTGGGTTTG     | 2                |                      |
| Ai07B3210  | Araip.B07  | 8138095   | 8138214   | ACAGAAGGAGATCGAAGGCA        | CAAGTTGGGCCTAACACGC         | 1                |                      |
| Ai07B3591  | Araip.B07  | 9119264   | 9119368   | CAGGTAATTAATGTGAAAATCAACCA  | AACAATTTAGATGCCCGCAC        | 1                |                      |
| Ai07B4496  | Araip.B07  | 11665650  | 11665791  | TTGTGATAGGGACCATAATATTGAGA  | CAAACGTTATACTGACGGTAGGG     | 1                |                      |
| Ai07B4966  | Araip.B07  | 13247897  | 13248073  | TCCTGCTGGATTTGAATAAGTATC    | CAACCCCTTTCTCTAAACCA        | 2                |                      |
| Ai07B5643  | Araip.B07  | 15893570  | 15893686  | TGTGAATGTTCTTATCATAATTCTTGT | GGTCCAGTGAACCTCAGAAAAAG     | 1                |                      |
| Ai07B5769  | Araip.B07  | 16216461  | 16216561  | TGGTCCACAGAAACAAAATCA       | TCATCCCTTCGGATCTGTTC        | 1                |                      |
| Ai07B5845  | Araip.B07  | 16475382  | 16475486  | GCAGCAACAACAACAGCAAT        | CGTTCCTTTCTTCTCCTCC         | 1                |                      |
| Ai07B6384  | Araip.B07  | 18536622  | 18536781  | GGGAGGGGAGAGAAATAAAGAA      | CTCCCTTCCCTCTCTC            | 1                |                      |
| Ai07B6696  | Araip.B07  | 19731006  | 19731133  | TCTTTCTCGGATCTCCCTCA        | CTTTTACACCCTCACCCACG        | 1                |                      |
| Ai07B6722  | Araip.B07  | 19838656  | 19838784  | ACTCCCATGTTGTCGAGTCC        | TTGGTATTCCACTTGACCGA        | 0                |                      |
| Ai07B6996  | Araip.B07  | 20817518  | 20817628  | TTTGGCTTGCTAGTTTTTCAA       | TACCTTCCCTCTTTTGCTGC        | 1                |                      |
| Ai07B7279  | Araip.B07  | 21979677  | 21979842  | AACAAGCAGACATAGATTCATATACAA | TGAGAACTTTTTGCCTTTTCTTT     | 0                |                      |
| Ai07B8626  | Araip.B07  | 27522975  | 27523082  | TCAATGAGGCACAAGAGCTAAA      | TGTAGGTGAGAGACACCCC         | 1                |                      |
| Ai07B8981  | Araip.B07  | 29181073  | 29181224  | GGAGGAGAGAGAGAAGGGAGA       | TGAAACAATTTAAAAACCATATCCA   | 1                |                      |
| Ai07B9112  | Araip.B07  | 29687975  | 29688079  | GACTTCCAACGCTTAATGGG        | TCCACCATCAATGTTTTCTCC       | 1                |                      |
| Ai07B9137  | Araip.B07  | 29785081  | 29785198  | TAATGCTGAGGGCACGTTTT        | CATCATCAGAATAAAGGGTCTTGA    | 1                |                      |
| Ai07B9654  | Araip.B07  | 31927297  | 31927441  | GGGAAGGAGAGAGAGGAATAGG      | AAAACCTGGTTTTATTTAAACTCCAAA | 1                |                      |
| Ai07B10001 | Araip.B07  | 33311850  | 33311957  | CGATCCTTATCGTAATTATTCGTTT   | TGCTTGTCTCACATCTGTTCG       | 1                |                      |
| Ai07B10177 | Araip.B07  | 34014395  | 34014546  | GCCCCATTACTATAGGATTTTT      | TTTTGTGTACCTTATCCCAAATC     | 1                |                      |

| ID         | Chromosome | SSR_start | SSR_end   | FORWARD PRIMER (5'-3')    | REVERSE PRIMER (5'-3')   | Bands in parents | Polymorphism in RILs |
|------------|------------|-----------|-----------|---------------------------|--------------------------|------------------|----------------------|
| Ai07B10449 | Araip.B07  | 35228912  | 35229040  | CCTCTTCCTGGTGATTTTGC      | TGCAAAACTCAAACTCCTCC     | 1                |                      |
| Ai07B10890 | Araip.B07  | 37212338  | 37212451  | TTCCCTTTTCTTTGGGATGA      | AAAAATGGGTGCACATTCA      | 0                |                      |
| Ai07B11008 | Araip.B07  | 37853656  | 37853781  | ATTATTGCATGCACAGGGCT      | TTGATTCTAATATTTTTGTGACGG | 1                |                      |
| Ai07B11610 | Araip.B07  | 40844474  | 40844690  | TGTTGGTGTGTTGGTGTATG      | TTATCTTCTTCTCCTCCCCCA    | 1                |                      |
| Ai07B11969 | Araip.B07  | 42625920  | 42626120  | TGCATTCTTTTCAATCACAACA    | GGACAAAATGTCCCAAAGAA     | 0                |                      |
| Ai07B12303 | Araip.B07  | 44567063  | 44567200  | TGGAGGCCAGGTAAACACAT      | CTTCTTCCTCCGTGAGCTTG     | 0                |                      |
| Ai07B12343 | Araip.B07  | 44711334  | 44711450  | GAAAAGGGAGAAGACTGCCG      | GCAACAACAATATTTACAACAAA  | 2                |                      |
| Ai07B12485 | Araip.B07  | 45489746  | 45489899  | TTTGTCAATTGAAGGAAAAGGAGA  | TAGGCAGATTGCACCTGTGT     | 2                | Yes                  |
| Ai07B12703 | Araip.B07  | 46754370  | 46754505  | TTGTTTAACCACCTCTTGGCTT    | CCCTTTCAAAACCTCCTAACCA   | 1                |                      |
| Ai07B12808 | Araip.B07  | 47252751  | 47252865  | TCCCACGAATTGGGACTATC      | TGAACGCCATTTTATGGAAC     | 1                |                      |
| Ai07B12987 | Araip.B07  | 48256804  | 48256904  | CGTTCCCGAGCAAAAATAAA      | ACCCCTCACCATAACCCTTC     | 1                |                      |
| Ai07B13466 | Araip.B07  | 51630231  | 51630419  | TGGGGTGATTTTATCCCCT       | TGCATTGGTTTACTATGCTTTCA  | 1                |                      |
| Ai07B14965 | Araip.B07  | 61065047  | 61065188  | AAATCAACAACATTCCATTTATGTG | AGGGGGTACACGCTTAAGGA     | 1                |                      |
| Ai07B15156 | Araip.B07  | 62463327  | 62463437  | TTCTCCTATTGTGGAACGAAA     | TTTGAATGGTTCTTTGTCTTTT   | 2                |                      |
| Ai07B15170 | Araip.B07  | 62516949  | 62517056  | TGTAATGTCCTGGGAAAGCC      | GAGGTTTGCAGGATTTGGAA     | 1                |                      |
| Ai07B15442 | Araip.B07  | 64172984  | 64173121  | TACGGACAAAAGCAACACCA      | GGGAATGGTATGCATGTAACG    | 1                |                      |
| Ai07B16352 | Araip.B07  | 69796613  | 69796734  | TTTGTGTTTGTCTTATCTTTTCAA  | GTGAGTGGGGGAGAGATGTT     | 1                |                      |
| Ai07B16615 | Araip.B07  | 71526411  | 71526510  | TTTTCAGGGTTGTAATGGGG      | CAAAAGTGGGAAAATTTGGG     | 1                |                      |
| Ai07B17094 | Araip.B07  | 74809105  | 74809235  | TGCTCAGGTCCCTCAATTC       | TCACTTTCTCTTTCCCCTTCC    | 1                |                      |
| Ai07B18406 | Araip.B07  | 78615768  | 78615917  | TCAAGCAATTTTGGTCACG       | TGCTTCTTCATCAGGGAGAGA    | 1                |                      |
| Ai07B18410 | Araip.B07  | 78628062  | 78628171  | AATCCCCACTTTTGCATCAC      | TGTGAATATTGGGAATTTGGG    | 1                |                      |
| Ai07B20570 | Araip.B07  | 93861652  | 93861783  | TGGGGTAACTTTTGTCCCCT      | TTTGAAAATGGGTGCATTC      | 1                |                      |
| Ai07B21222 | Araip.B07  | 97450873  | 97451034  | AAAACAGAAGTGGCGAGGTG      | CGATTTTGTTTGCCCATTC      | 1                |                      |
| Ai07B21230 | Araip.B07  | 97465991  | 97466104  | GGCTAGTCGGCCTAAACTCC      | CGTTCACGCACGGTAACTAA     | 1                |                      |
| Ai07B21428 | Araip.B07  | 98380128  | 98380316  | GCTACATCACCATCGTCCG       | CGAAAGGGTAGAAGAAGAAGGA   | 1                |                      |
| Ai07B22560 | Araip.B07  | 104067576 | 104067680 | AACCCGTCTCTGGGCTTACT      | TCGTGTTATGTTCCATGTTCCG   | 1                |                      |
| Ai07B22606 | Araip.B07  | 104257260 | 104257396 | TTATCACTCTCCCCTGGCTC      | ACCATTTGGTTTCCCTTTCC     | 1                |                      |
| Ai07B22805 | Araip.B07  | 105160201 | 105160356 | TCTCGTGCTGATAACGTGTTG     | CAAATGCGATTCTCTCTCTTTT   | 1                |                      |
| Ai07B23662 | Araip.B07  | 108883922 | 108884089 | AGAGGGATCAAGTGTGGACG      | TGCAAAATATCTTGTAATCCCCA  | 2                | Yes                  |
| Ai07B24086 | Araip.B07  | 110897713 | 110897832 | TGGGATTTATCGGAGGCTAA      | TCCCCAATTTGAGTTCCATC     | 1                |                      |
| Ai07B24806 | Araip.B07  | 113469277 | 113469393 | TTTGGGCCATTTTATTTCAA      | AAGAATTTGAATTCGGGGTT     | 1                |                      |
| Ai07B24856 | Araip.B07  | 113664273 | 113664394 | GGAAGGATCTGCCATGAAAA      | TTTGGTTTTCCCTATCTGGC     | 1                |                      |
| Ai07B26726 | Araip.B07  | 119647662 | 119647813 | ATGATTAACCCCCACACGAA      | TCGCCATACATGTGTGTAAAGA   | 2                | Yes                  |

| ID         | Chromosome | SSR_start | SSR_end   | FORWARD PRIMER (5'-3')      | REVERSE PRIMER (5'-3')     | Bands in parents | Polymorphism in RILs |
|------------|------------|-----------|-----------|-----------------------------|----------------------------|------------------|----------------------|
| Ai07B26973 | Araip.B07  | 120202957 | 120203093 | AAGGATGGTTTGTGTTGG          | CCTCCCTTCTTCCATTCCAT       | 1                |                      |
| Ai07B28513 | Araip.B07  | 124027904 | 124028045 | CCGTTTTTCAAGACTCCTCG        | CACCTGACCACACTGAATCTT      | 2                |                      |
| Ai07B28858 | Araip.B07  | 124906789 | 124906930 | TGTGACCAGAATCCCCACAA        | CCAGATCCCTAGCACTACCC       | 2                |                      |
| Ai08B1164  | Araip.B08  | 2684699   | 2684826   | TGCTCCACCTCAGACCAAC         | TTGACACGCACAATTATTTTATGA   | 1                |                      |
| Ai08B1264  | Araip.B08  | 2920573   | 2920707   | GAGAAAGAGAAGGCAAGAAACG      | CCTTCTTCTCCTGCTGCAC        | 0                |                      |
| Ai08B1584  | Araip.B08  | 3780072   | 3780171   | TGCGTGTCTTTGTACGAATC        | CCTTCTTGCCTGGGTTATCA       | 2                |                      |
| Ai08B2682  | Araip.B08  | 6446355   | 6446482   | TGGATGCCTATGCTGCTAAA        | GCTCTCGTTTTGGTTTCTTCG      | 2                | Yes                  |
| Ai08B2811  | Araip.B08  | 6889133   | 6889267   | TCATTTTGCATTGTTCCA          | AAGCGACAGGTCAAGCATAAC      | 1                |                      |
| Ai08B3313  | Araip.B08  | 8407549   | 8407650   | GAGCTAGGAACAGGGCTCT         | CAATAAATCCGACGGCAACT       | 1                |                      |
| Ai08B3700  | Araip.B08  | 9650167   | 9650305   | TTACCAGCCTCTTTATGCCA        | TGGGTAACGGATTCTACTTATGC    | 1                |                      |
| Ai08B4590  | Araip.B08  | 12912035  | 12912220  | AGAGGGATCAAGTGTGGACG        | TGCAAATATCTTGTGATCCCC      | 1                |                      |
| Ai08B5046  | Araip.B08  | 14508942  | 14509085  | CGGGGACAATTTTGATTTTG        | GGTGGTGGAGATGTGACTGA       | 1                |                      |
| Ai08B5110  | Araip.B08  | 14733283  | 14733397  | CGAGATAACGAAACAACCGA        | CGTTGGGATGTTACCGT          | 1                |                      |
| Ai08B5504  | Araip.B08  | 16096508  | 16096612  | CACATGTGGAAGAGGCACTG        | TGCAGCTCGTTCTTCTTTGA       | 1                |                      |
| Ai08B5650  | Araip.B08  | 16535153  | 16535324  | GGCTTCTTTCTCTGCGGATT        | TGGAATTTTGGTGCATTTTG       | 2                |                      |
| Ai08B5890  | Araip.B08  | 17435942  | 17436087  | CATTGTCGTCGTACAGTCA         | AAAAAGGATGATGAGAAAAGAAGAAA | 1                |                      |
| Ai08B6358  | Araip.B08  | 19245667  | 19245811  | TGTTAACGTTATGTTTTGTAAATGAAA | CGGAAGAGTACCAAGGCTCA       | 1                |                      |
| Ai08B6392  | Araip.B08  | 19354677  | 19354810  | AGTGCAGCTTTGACATCCCT        | GTCATCCTTGTACGAAGCC        | 1                |                      |
| Ai08B6402  | Araip.B08  | 19374229  | 19374334  | GCAGTCGCAACAACAAAAGA        | AAGCAATTTTAGGTACACGCG      | 1                |                      |
| Ai08B6600  | Araip.B08  | 20008270  | 20008371  | TGCCCTGTTTCTTAACTGGC        | TAAGCAAATCCCCATCGAAC       | 1                |                      |
| Ai08B7309  | Araip.B08  | 22579223  | 22579334  | GAGGTTGACTTGGAGAACTGG       | CTCGACCTGCGAAGTAAAGG       | 1                |                      |
| Ai08B8719  | Araip.B08  | 27913737  | 27913838  | TGCAGAAATTAGGGGATTAGTG      | CACGTTGATCTATTAGTGCCG      | 2                | Yes                  |
| Ai08B9423  | Araip.B08  | 31598363  | 31598539  | TGAGCTTATTTCTTCATTGGGC      | CATGCCGTAAAGCAAAGGAT       | 1                |                      |
| Ai08B9636  | Araip.B08  | 32536487  | 32536591  | GAAAAACTGTGGAACTTGGG        | GCATTGGGGTAATTTTGTCC       | 1                |                      |
| Ai08B9789  | Araip.B08  | 33426382  | 33426507  | CATTGGGGTGATTTTGTCTT        | AAATCCATGTGCATTGATAAGC     | 1                |                      |
| Ai08B9945  | Araip.B08  | 34064180  | 34064320  | TGCAAACATGGTATGGAGG         | TGAGTCCGGATATTTTCTATTGG    | 2                |                      |
| Ai08B10055 | Araip.B08  | 34548420  | 34548549  | GATCTCTTTTGTGTATTTGGGC      | TGCTTGCCTACGAAGAAAAC       | 1                |                      |
| Ai08B10317 | Araip.B08  | 35840233  | 35840339  | GAATGTCATGCAATGCAACC        | TGCTTTTTCTCCCATCTCAA       | 1                |                      |
| Ai08B10774 | Araip.B08  | 38342993  | 38343101  | TCCATATGTCACAGGCAGGA        | TCAACAATAAACATCCATTCCA     | 1                |                      |
| Ai08B11147 | Araip.B08  | 40464242  | 40464349  | TTTGTTTTATCCAGCAGCCC        | AGCATCCCACCGAATCCTAT       | 2                | Yes                  |
| Ai08B11284 | Araip.B08  | 41241868  | 41242032  | AGGAGAGAGAGGAAATCACGC       | GGGCTTAGCCAATGAACAAA       | 2                |                      |
| Ai08B11983 | Araip.B08  | 45108958  | 45109125  | CTCCCTTCCCCCTTCACT          | GGAAGAGGGAGAGAGAAATAGG     | 1                |                      |
| Ai08B12206 | Araip.B08  | 46272914  | 46273053  | GCATCCAAACTAAATGCAGG        | TTGAATTTTGGTATATTGAATTTGC  | 1                |                      |



| ID         | Chromosome | SSR_start | SSR_end   | FORWARD PRIMER (5'-3')  | REVERSE PRIMER (5'-3')    | Bands in parents | Polymorphism in RILs |
|------------|------------|-----------|-----------|-------------------------|---------------------------|------------------|----------------------|
| Ai08B12332 | Araip.B08  | 47001609  | 47001722  | GTGCACAATTTGGTGGGAATG   | TCCATCTAATTGACCCCACC      | 1                |                      |
| Ai08B12334 | Araip.B08  | 47008052  | 47008213  | GCACTCTTCAAGGTCCTCCA    | CAAAGACATCTTGATACCTTGTGTG | 1                |                      |
| Ai08B12408 | Araip.B08  | 47444565  | 47444747  | AGATGCCGTTACTAATGCCG    | TGGTCAAAATTCAAATGCAAA     | 1                |                      |
| Ai08B12844 | Araip.B08  | 50320257  | 50320383  | TGGGGTAATTTTGTCCCCTT    | TTTTGAATATTGAGAAATTTGGG   | 2                |                      |
| Ai08B12917 | Araip.B08  | 50725214  | 50725323  | AAATCACGACGTTTGGGTTT    | GGCAGCTCCTCTCTTTTCTTC     | 1                |                      |
| Ai08B13358 | Araip.B08  | 53520207  | 53520314  | TGCTAGCTCCAAGCAATCAG    | GGTGGGTGAACACCAAACCTT     | 1                |                      |
| Ai08B15928 | Araip.B08  | 70116821  | 70116930  | CATGTAATGCACACAATGCAA   | CCACCATTGCCTCATTATA       | 1                |                      |
| Ai08B16184 | Araip.B08  | 71500431  | 71500544  | TCACTCTGCACAACCAAACC    | TGACGGTGAGAGTGAGTGATG     | 1                |                      |
| Ai08B16530 | Araip.B08  | 73595610  | 73595720  | TTCAACCTGATCCTCAACCTTT  | GGCTAGCATGGGTTCTAGCTT     | 1                |                      |
| Ai08B16802 | Araip.B08  | 75373888  | 75373991  | ATGCATACATGCCACGTTTC    | GAGCTTTCTCTGTAAGACTCCAAA  | 2                | Yes                  |
| Ai08B16954 | Araip.B08  | 76105544  | 76105645  | CTGTTCGTGGTTCTCCTCCTC   | TTCATGCAAAATGGGATGTTT     | 1                |                      |
| Ai08B17086 | Araip.B08  | 76913567  | 76913686  | GCCATGTGTTGGCTTTTCTT    | TCTCACCCACTTAATCATTGTTG   | 1                |                      |
| Ai08B17435 | Araip.B08  | 78028511  | 78028685  | GCGATAAATGTAAACCAGACAGG | TGGCTGAATAGGAATTTTCTTG    | 0                |                      |
| Ai08B17761 | Araip.B08  | 79738631  | 79738782  | GGAGGGGGAGAGAGAGGG      | TCCTTCCCCCTTCTTCTT        | 1                |                      |
| Ai08B18824 | Araip.B08  | 87106785  | 87106887  | GATCCTTGTTCTCGAGACTTT   | CACGAAGCACCAAAATAATTCA    | 1                |                      |
| Ai08B18992 | Araip.B08  | 88291825  | 88291957  | GATGAGCGAGAGAGAGAAAGAGA | CTCTCCCCTTCTCCTCCCC       | 0                |                      |
| Ai08B20545 | Araip.B08  | 97265190  | 97265333  | GCAGCGACATTCCCTCATTTA   | TCCCTCTAACCTAGCCACCA      | 1                |                      |
| Ai08B21495 | Araip.B08  | 102521374 | 102521477 | GGGAGAAGAAAGAGAGAAAAGG  | TTTTTCTCCCCTCTCCCTTG      | 0                |                      |
| Ai08B22626 | Araip.B08  | 107561821 | 107561970 | CTCAAACCATCATAACGTTGAGT | TTTTTATATGTGCCCGTACAGTG   | 1                |                      |
| Ai08B22632 | Araip.B08  | 107574624 | 107574746 | CAACACCAAATCTCTTGCTCTAA | GCAGAGTAAAGTGTAAGAGTGGA   | 2                |                      |
| Ai08B22677 | Araip.B08  | 107731797 | 107731911 | TCTCCGCATGTATAACGGGT    | TCGGAAAAAGGCTAAAGACG      | 1                |                      |
| Ai08B22875 | Araip.B08  | 108619059 | 108619214 | CACGTGTGAAACCAAGGAAA    | TTATGCGTGTTTTTCGCTCA      | 1                |                      |
| Ai08B23399 | Araip.B08  | 110817640 | 110817779 | ATCCTACCCGTTTACGTCC     | TCATGAAACTGAGGTGGTAAGG    | 1                |                      |
| Ai08B23571 | Araip.B08  | 111465344 | 111465451 | TACCATCACTCATCCGCATC    | TCACTCATACTTGCACCTCTCG    | 1                |                      |
| Ai08B23999 | Araip.B08  | 113125436 | 113125645 | TGTTCCACAACAAATTCACAA   | CTTACCACCCGCCATACC        | 2                | Yes                  |
| Ai08B24261 | Araip.B08  | 114076453 | 114076578 | GGCCAGGTTACACATTCAT     | TGTGAGCTGGCCTCAATGTA      | 1                |                      |
| Ai08B25768 | Araip.B08  | 119564998 | 119565108 | GAATTCGATTTGCGTGGACT    | GCTTTCTCGCTCCACTGTTT      | 1                |                      |
| Ai08B28815 | Araip.B08  | 128128539 | 128128665 | TTGGAAGAACCAACAAAAAGG   | TTGTCCAAATTATCTTTCACCAA   | 0                |                      |
| Ai08B29061 | Araip.B08  | 128596411 | 128596556 | TTTTTCCCTTCTCTCCCAT     | ACAATTGGGAAACGCTTCAA      | 1                |                      |
| Ai08B29551 | Araip.B08  | 129486910 | 129487019 | GCCAATGATTGAAAGAGCGT    | CCGTCAAATTTGTACCAGTCA     | 2                |                      |
| Ai09B1095  | Araip.B09  | 2476857   | 2477017   | TTTCAACTCTGCGGCTAACA    | TGGGTTAGGAAGTGAGAGAGC     | 1                |                      |
| Ai09B1399  | Araip.B09  | 3143308   | 3143439   | GGAGTCAAACCTCAAACCTCAA  | GAAGGGTGGCAGAAATTCAA      | 1                |                      |
| Ai09B1486  | Araip.B09  | 3428351   | 3428533   | TTTTCTTCTCCATGCCTCC     | GAGGAAGAAGAACGTGCAGC      | 1                |                      |

| ID         | Chromosome | SSR_start | SSR_end   | FORWARD PRIMER (5'-3')      | REVERSE PRIMER (5'-3')     | Bands in parents | Polymorphism in RILs |
|------------|------------|-----------|-----------|-----------------------------|----------------------------|------------------|----------------------|
| Ai09B2631  | Araip.B09  | 6358820   | 6358977   | TCTACATAGGTTCCCACATTGA      | ATCGGAGATGACAACGGATT       | 0                |                      |
| Ai09B3105  | Araip.B09  | 7755023   | 7755162   | ATTGTTGTGTTTGGGTCCGT        | AGAAGAGGAATTGGTGGTGC       | 2                |                      |
| Ai09B3164  | Araip.B09  | 7942108   | 7942236   | CAGTGTAACAAGATAAGAGAAGGG    | CTCCTTCGATGAGGCTGTGT       | 1                |                      |
| Ai09B3657  | Araip.B09  | 9363457   | 9363573   | GAAGGGGTTAGGAGGGTGAG        | AGCTTTCGAAACGGACTTCA       | 1                |                      |
| Ai09B4318  | Araip.B09  | 11183697  | 11183798  | AAAATGTTTGCTCGTCCTCG        | CTCCAAACCCAACCCTAAT        | 1                |                      |
| Ai09B5213  | Araip.B09  | 14080427  | 14080554  | GCGATAATGATAAACTTGAGTGGA    | TGCCAAACTTCAAAGACAGAAA     | 2                | Yes                  |
| Ai09B5343  | Araip.B09  | 14428068  | 14428204  | GCAGGTATCACTCTATTCTTATCTTCC | GCATGATCCTCCAATTTAAGC      | 1                |                      |
| Ai09B5522  | Araip.B09  | 14864561  | 14864712  | TCGTACCGTCCCATTCTACC        | GGAATATTCATCATACACAGCCAA   | 2                |                      |
| Ai09B5626  | Araip.B09  | 15203036  | 15203152  | AAGCTGCAGAATGGTTTTATTT      | GAGAAGTCTCTGTGAGATAACCTGTG | 1                |                      |
| Ai09B6076  | Araip.B09  | 16666782  | 16666925  | CATGGTAAAAATTATCACATACACAA  | TGGTCTTGATGGATAAGCAGG      | 1                |                      |
| Ai09B6253  | Araip.B09  | 17133876  | 17133992  | TGGTTAAACCCAACACAGCA        | TGTAACCCAATGTGGTCCCT       | 1                |                      |
| Ai09B6579  | Araip.B09  | 18319557  | 18319720  | AATGGATGATAAGGTTGGCG        | CAAAGATTCAATTCATCAATCACC   | 2                |                      |
| Ai09B7201  | Araip.B09  | 20709491  | 20709644  | TTTGGCTCTTAGAAGGTCTAAACA    | AATCCGCAACCTATTGGAAA       | 1                |                      |
| Ai09B7988  | Araip.B09  | 23979964  | 23980107  | AAAGTGTTACCAAGTGTTTGA       | TCTTCAAGCCCAGAAAAATGA      | 1                |                      |
| Ai09B8041  | Araip.B09  | 24247941  | 24248042  | ATTTTACACGCGCCACTTAT        | CGTTGAATCAATCCAGATCCA      | 1                |                      |
| Ai09B8102  | Araip.B09  | 24404440  | 24404595  | TGATTATGGGTGGGCGTAAT        | TCCAAAATTTTACAGTCTCA       | 1                |                      |
| Ai09B9921  | Araip.B09  | 32112396  | 32112529  | AGAGTTGCTAAAACCTCCATCAAA    | CCAAGAATGAAGCATGCAAT       | 0                |                      |
| Ai09B10252 | Araip.B09  | 33889491  | 33889638  | CTGGCAAAAATCCTAACGTC        | AATTAATTCACATTCTCAAGGAGTC  | 1                |                      |
| Ai09B10389 | Araip.B09  | 34693224  | 34693373  | TCTTCTTCTTCTTTGTTTGATTTTT   | TTCTTCTCCCTCCTCCTCATC      | 1                |                      |
| Ai09B12502 | Araip.B09  | 45887167  | 45887272  | AAACTTCCAATCCCAACAA         | CTTCGAGAGAACACGGAAGG       | 1                |                      |
| Ai09B13479 | Araip.B09  | 51123184  | 51123307  | GCTGAAGTCAATCCAGATCCA       | CAACGTAAACCTGCTGTTGC       | 1                |                      |
| Ai09B13628 | Araip.B09  | 52186547  | 52186646  | CCATGATGGAGAAAGGGAGA        | CGGCATGAGTCTCTAAACCC       | 1                |                      |
| Ai09B14054 | Araip.B09  | 54610599  | 54610736  | TGTTTCATTTAAGTGTGGGAGAA     | GGCATATGCTATTCAAATCATCC    | 1                |                      |
| Ai09B14094 | Araip.B09  | 54831079  | 54831222  | AACCATTTTCTCCCAACCC         | TAGTGTTGGTTTCGGCCAAG       | 1                |                      |
| Ai09B16024 | Araip.B09  | 69545785  | 69545893  | AATCGGTGTTTTTGGGATGA        | GCTCAAAAATCATGTTCCACAA     | 1                |                      |
| Ai09B17576 | Araip.B09  | 81368520  | 81368642  | AAACCGTATAACCGCTCCAA        | TTGTACCATCGCCTTTATCTTT     | 1                |                      |
| Ai09B17640 | Araip.B09  | 81769690  | 81769841  | TCAGTGGCTTGTGTGTGTGTT       | TGGTTCACAACCTTTCGTCACA     | 1                |                      |
| Ai09B19910 | Araip.B09  | 96543683  | 96543792  | TGGGATGCAACCTACCTACC        | TGAAGGGTTTGAAGCTCGAT       | 1                |                      |
| Ai09B20243 | Araip.B09  | 98607203  | 98607336  | CCAAACGTGTAAAGGCACAA        | TAAACTCCGCGAGTTGCAG        | 1                |                      |
| Ai09B20643 | Araip.B09  | 101287236 | 101287400 | GATGCAGCAGAGAGCTTCAA        | TGTTTCAATGACAGGAAAAGCA     | 1                |                      |
| Ai09B20935 | Araip.B09  | 102708444 | 102708545 | CAATCCAGATCCATAATGCAGA      | TTTTTCCCACCCACACACTT       | 1                |                      |
| Ai09B21904 | Araip.B09  | 107865081 | 107865239 | TCTTTGCCTATGTTATTCATCATTG   | TTCACTTTTGGCTACACTTTTCA    | 1                |                      |
| Ai09B22054 | Araip.B09  | 108767606 | 108767763 | AACCATATGGATTGATGGTGTAT     | CCTAGCTACCCATTTCATTGC      | 1                |                      |

| ID         | Chromosome | SSR_start | SSR_end   | FORWARD PRIMER (5'-3')      | REVERSE PRIMER (5'-3')      | Bands in parents | Polymorphism in RILs |
|------------|------------|-----------|-----------|-----------------------------|-----------------------------|------------------|----------------------|
| Ai09B23112 | Araip.B09  | 113878319 | 113878474 | CTGCAGCGAAGTGGATTTTT        | TCAAGCTCCAAACTCAGCCT        | 1                |                      |
| Ai09B23472 | Araip.B09  | 115356176 | 115356303 | TTTGGACAATTGACGGTTCA        | AAAAAGATGCAATTGACACCAA      | 1                |                      |
| Ai09B24635 | Araip.B09  | 120829803 | 120829954 | AACATCTTCGCTCCTTCCT         | CATCACCATTGAACCAACCA        | 1                |                      |
| Ai09B24954 | Araip.B09  | 122145891 | 122146024 | CGCCCAGGCTTATAGTGAAG        | CCTTTCTCCTGTGCGAGTCCA       | 1                |                      |
| Ai09B25734 | Araip.B09  | 125214306 | 125214439 | CGTTTGAACATTTTCCCAAGA       | CCTTTCTCCGTAAGGGTTCT        | 1                |                      |
| Ai09B26364 | Araip.B09  | 127935132 | 127935239 | CAATAATGTTTTTCAGAGTAAAACACC | AAGCAACACACAAATCCACCT       | 1                |                      |
| Ai09B27069 | Araip.B09  | 130654843 | 130654961 | CTACATCACGCAACCATTTCG       | CCCATATTATCATCTGCATCATC     | 1                |                      |
| Ai09B27970 | Araip.B09  | 133715662 | 133715855 | CGAAGAGGGAGGAGAGAAAGA       | GAGGAAGTAGAAGAAGCTTTAGGTTT  | 1                |                      |
| Ai09B28003 | Araip.B09  | 133820067 | 133820180 | TTCTTTTTGGTACATAATATTTGGATT | CGCGGACAATTTGTATGAAA        | 1                |                      |
| Ai09B28300 | Araip.B09  | 135031749 | 135031901 | AATCTTGCCAACTGCCTCAC        | TTCTTAATTATGTTCCATGCCA      | 1                |                      |
| Ai09B28487 | Araip.B09  | 135580521 | 135580755 | GGCAGTTTTGGGTGGCTC          | AGAAGCAGCAGCAGGACG          | 1                |                      |
| Ai09B28756 | Araip.B09  | 136357001 | 136357150 | AGCCGAAGATATCGGTTAGG        | AGGTTTGTAAATTAACAATCAATAGCA | 1                |                      |
| Ai09B28929 | Araip.B09  | 136866584 | 136866721 | TCACATCCCTCTCTCCCTCT        | TGGATGAGGATGTATGGCAA        | 1                |                      |
| Ai09B30090 | Araip.B09  | 140254168 | 140254308 | TGCTTCGTTTTATTCTGTCC        | TTGTGTGAATTGAAAGCAAAAAC     | 1                |                      |
| Ai09B31536 | Araip.B09  | 144130889 | 144130997 | CCACTTCTTTCTTCTGCCTTTC      | TTGCAGCAGAGTCACGGTAG        | 1                |                      |
| Ai09B31714 | Araip.B09  | 144540619 | 144540738 | TCAGTTTCCAAAGCGCTACA        | TTCTGTAAATCGTTTGGGTG        | 1                |                      |
| Ai09B31870 | Araip.B09  | 144835693 | 144835815 | CGGTGGTGAGTGTTTGAGTG        | AATTAATGGCACGGCAACTG        | 1                |                      |
| Ai09B32075 | Araip.B09  | 145325108 | 145325229 | CATTTCTCTCGCTCTCTCC         | GAGAAAGAAGGGAAGGGGG         | 0                |                      |
| Ai09B32212 | Araip.B09  | 145606209 | 145606313 | TGCCAACTCAAATCCAACAA        | TGGAGGATGAAGAAGAAAAGGA      | 1                |                      |
| Ai09B32544 | Araip.B09  | 146330590 | 146330709 | TCTGGGCTTCCTTCTTTTAGG       | AAAAAGTGTGTCACTTCAAATCCA    | 1                |                      |
| Ai09B32593 | Araip.B09  | 146453284 | 146453402 | GAAAGACATAGATTCAACCCCC      | AAATGAAGGAGCGAGGGATT        | 1                |                      |
| Ai10B47    | Araip.B10  | 212039    | 212145    | GCGAAATTGGGTTGTCAGAT        | TCGGATCCTCTTGTCTTCCA        | 2                |                      |
| Ai10B252   | Araip.B10  | 593793    | 593943    | AAAGCGCGTGCATTTACTG         | AAACCATGACAAGAGGCAGAA       | 2                |                      |
| Ai10B1190  | Araip.B10  | 3035159   | 3035281   | GCAACGCTGACTCACACACT        | TGTTTTGGGTGATTCAAGTAGG      | 2                |                      |
| Ai10B1259  | Araip.B10  | 3228965   | 3229129   | TTTCTTCTTTGTTCTGCCGC        | GTCCCAGGAGCTTCCAGTTC        | 2                |                      |
| Ai10B2613  | Araip.B10  | 7077291   | 7077430   | AACAAGTAGAAATTGGTCCATAAAA   | GGATAGGATTATAGGAATTGTTCCA   | 0                |                      |
| Ai10B2736  | Araip.B10  | 7593230   | 7593334   | TGCCAAACTTCAAGAACAAAAA      | AAGTTGCACCCACTCGTGAT        | 1                |                      |
| Ai10B3187  | Araip.B10  | 9225984   | 9226085   | GGCAGTAGGACGAAGACGAA        | GAGTCACTGGCTCACTGCTG        | 1                |                      |
| Ai10B3700  | Araip.B10  | 10791144  | 10791246  | TCTCGTGCTGATAACGTGTTG       | GAGGCTTGATCAGAGGCAAT        | 2                |                      |
| Ai10B6238  | Araip.B10  | 20030716  | 20030846  | TTTTTGGTGTTTCACTTCAAGG      | TGTACATATATGCATTCAAGCCC     | 1                |                      |
| Ai10B6334  | Araip.B10  | 20437003  | 20437169  | TGAAATGGTGGCTTGCAATA        | CCTCTCTCCATCGCTCAC          | 2                | Yes                  |
| Ai10B6684  | Araip.B10  | 21879436  | 21879554  | ATCACTCACGTCCGGGTAAG        | CCCTCATAGAGGTTGACTTGG       | 1                |                      |
| Ai10B7011  | Araip.B10  | 23087409  | 23087563  | GAGAAGCCATATCAATTCACCTCA    | GAGAGGGAGGGAGAGAAGGA        | 1                |                      |

| ID         | Chromosome | SSR_start | SSR_end   | FORWARD PRIMER (5'-3')     | REVERSE PRIMER (5'-3')      | Bands in parents | Polymorphism in RILs |
|------------|------------|-----------|-----------|----------------------------|-----------------------------|------------------|----------------------|
| Ai10B7757  | Araip.B10  | 26243290  | 26243409  | GGTGGTAAGACGCTACGACCT      | TTTCTGCATAAGCTTTCCACC       | 0                |                      |
| Ai10B8533  | Araip.B10  | 29838391  | 29838578  | GAGAGGAGGGGGAGATGAAC       | TCCCTCTTCTTTCTTTTCTTTT      | 2                |                      |
| Ai10B9706  | Araip.B10  | 35251915  | 35252052  | TCCTTGTTGGTTGATCGCATA      | TCAGAAGTAGCGCAGCACAT        | 2                | Yes                  |
| Ai10B9899  | Araip.B10  | 36200952  | 36201058  | TTCTTTCTCCCAACGCAATC       | CTCACCAGTAATGCCAAGTAGA      | 1                |                      |
| Ai10B10082 | Araip.B10  | 37201979  | 37202080  | GTGTGTTGGTGGGTTTTCAA       | CCCTTTCTCCCAATTTTTTC        | 2                | Yes                  |
| Ai10B12455 | Araip.B10  | 50409494  | 50409606  | TCAAGCCTCATGTCAAGCAC       | CTGGTAAGAGCACTGGCACA        | 2                | Yes                  |
| Ai10B13195 | Araip.B10  | 54880258  | 54880397  | GGAATCGGGTGCATACTCAT       | TCACTTTTTACACACTCATGC       | 1                |                      |
| Ai10B13765 | Araip.B10  | 58252643  | 58252804  | CTGAACCTCGCAGGTTGTGA       | CCCAAATACATGTTTAAAACCC      | 1                |                      |
| Ai10B14520 | Araip.B10  | 64274968  | 64275089  | TTAGAATGTTGCTCGCCCTC       | CCACAGGATCACCTCAGGAT        | 1                |                      |
| Ai10B15315 | Araip.B10  | 69338032  | 69338143  | GAGGAAGAGAGAAGGGAGGG       | CCAGTTTTTATGGTTAAGTTTAGTTTT | 1                |                      |
| Ai10B16055 | Araip.B10  | 73664183  | 73664293  | CCCTCAGGCTTACAAGAACG       | TTTTCGGGCTTCTCGTTAAA        | 2                |                      |
| Ai10B16530 | Araip.B10  | 77104218  | 77104391  | GAATCCTCTTCCCCATTTC        | GGTTAGCGACAACAAGGGAG        | 2                |                      |
| Ai10B16551 | Araip.B10  | 77195047  | 77195160  | GAAGGGTTGGCACTTTGTGT       | TTTTGTCTTGATTATTTGCCTGAA    | 2                |                      |
| Ai10B16637 | Araip.B10  | 77745590  | 77745709  | AGAAAGAGGGGGAAGGGG         | TCCATTGCTTTCGTTCCCTT        | 1                |                      |
| Ai10B16737 | Araip.B10  | 78348753  | 78348866  | CAAGAAGGCCACTAGGGTTG       | AGTCAACATAAGAAGCCGATCA      | 1                |                      |
| Ai10B17189 | Araip.B10  | 81467722  | 81467839  | TTTGGGGTATTTTTGTCTCCT      | TGGAAATTGGACATATTCATGC      | 1                |                      |
| Ai10B19252 | Araip.B10  | 94560678  | 94560847  | GCCAAACAGGCTAAAACCGT       | CTCCCGGAAGGTGATAATGA        | 1                |                      |
| Ai10B20207 | Araip.B10  | 99534666  | 99534803  | CACGAAGAGTGCCGACATTA       | GACTTCAGGCTCAGGCAAC         | 2                |                      |
| Ai10B21491 | Araip.B10  | 106273350 | 106273463 | CAGGGTGAAGACTACCCAA        | AAAGGGATACACCCAAAGGA        | 1                |                      |
| Ai10B22066 | Araip.B10  | 109090365 | 109090522 | TCCCTCTCTTCCCCTTACTT       | GGGAGAGCGAGGAAAAGG          | 1                |                      |
| Ai10B22075 | Araip.B10  | 109172169 | 109172273 | CCAAAATCAAATTTAGCAACA      | TTTTCGCTCCAAAATGGTTC        | 2                |                      |
| Ai10B22473 | Araip.B10  | 110781404 | 110781528 | AACCCGACAAGTCCAGTTTG       | CTACGACGTAAGGGTGACCG        | 1                |                      |
| Ai10B22816 | Araip.B10  | 112008979 | 112009093 | GTTGCAACGACGAATCTGTG       | CACGATTATGGAGAGAGGCAG       | 2                |                      |
| Ai10B23170 | Araip.B10  | 113456227 | 113456346 | CAGCCCCTTTTCATTTTCAA       | GCTCCATCAAACATCTTTTAATTC    | 2                |                      |
| Ai10B23974 | Araip.B10  | 116959956 | 116960056 | GTCGTGTGGAGCATCTCAAA       | TGCATGTTTGATTGACTTGAA       | 1                |                      |
| Ai10B24818 | Araip.B10  | 120137746 | 120137889 | TTGAGTCAATGTAAGGCTGAGAA    | CCGGCTATTATCATCCACAA        | 1                |                      |
| Ai10B25219 | Araip.B10  | 121638716 | 121638817 | CGAACCAACATTTCTTCCATC      | TTTAAATCTTTTCCATTTAACTTGC   | 1                |                      |
| Ai10B26233 | Araip.B10  | 125007574 | 125007765 | CCCTCGATATTATCATCTCTATCACA | CGGTGATGCTGAAAAACACA        | 1                |                      |
| Ai10B26837 | Araip.B10  | 126805715 | 126805814 | TGAAGGAACACTTCTCCTTGG      | AAATTTAGTGCGTGTGTGCG        | 2                |                      |
| Ai10B29118 | Araip.B10  | 132774127 | 132774274 | TCTCTTCGATTTCCGCATCT       | TAACCCTTCAACCCATGACC        | 1                |                      |
