# Supplementary material for: Development of SSR markers and identification of major quantitative trait loci controlling shelling percentage in cultivated peanut (Arachis hypogaea L.)
Source: PubMed Central journal article supplement (PMC5511596; doi:10.1007/s00122-017-2915-3), 2017-05-15
Supplement: 122_2017_2915_MOESM4_ESM.pdf [file 122_2017_2915_MOESM4_ESM.pdf]

**Table S4 Detailed information of the 862 polymorphism SSR markers genotyped in the RIL population.**

| <b>ID</b>  | <b>FORWARD PRIMER (5'-3')</b> | <b>REVERSE PRIMER (5'-3')</b> | <b>Source</b>          | <b>Alias</b> |
|------------|-------------------------------|-------------------------------|------------------------|--------------|
| Ad01A8152  | GCTTCACGTGTGTAATTCCG          | TGGTGCTTCATACGCCAATA          | newly developed marker | A01A245      |
| Ad01A8169  | TGTCACGATTA AAAAGTTTCGG       | TGGTAATTTTGCAGCATTATCTGT      | newly developed marker | A01A246      |
| Ad01A11348 | CCAAAACGGTTTAGTCGTGA          | CACAATTCAA AATTCTCCAGCA       | newly developed marker | A01A313      |
| Ad02A180   | TTTATTAACACGCGCACCAA          | GAAGGTGCAGCAAGAAGAAGA         | newly developed marker |              |
| Ad02A182   | TTTATTAACACGCGCACCAA          | CGTGCAGAAACGAAAGAAAA          | newly developed marker |              |
| Ad02A625   | ATCCAATTCCCAACATTCA           | AAGAACAGCCATGGTAACGG          | newly developed marker |              |
| Ad02A4133  | GTTGGAGTCATTTCGACCGTT         | CGCTTCAATCAA AAGACGA          | newly developed marker |              |
| Ad02A4136  | TCCGTTCAATGTTGGAGTCA          | GCGCTTCAATCAA AAGACA          | newly developed marker |              |
| Ad02A10600 | TTGATGGTATTTCCCTGTGAGTGA      | GCAGTCGTTTTCAACCCCTA          | newly developed marker | A02A291      |
| Ad02A12962 | TCTTCTTCTCCCAACCAATGA         | CGACGAGGACAATGATGATG          | newly developed marker | A02A348      |
| Ad02A16744 | CGATAACATCTTTGTGTATTGACTCTC   | TTAGCGGTAATCATGTTTAGAATGT     | newly developed marker |              |
| Ad03A9257  | GCATGCATACATACGATACCAA        | CAAGAAGTGGACGAGGAAGC          | newly developed marker | A03A292      |
| Ad04A21    | GGATGCACGTCATT CAGAAG         | GCTCATCAAGCTGCTGAGAAA         | newly developed marker |              |
| Ad04A10156 | GCCAAGTTATGGTGTCTTCTCC        | AGTTGATCCATTGATTCCGGG         | newly developed marker |              |
| Ad04A12402 | CCTGCAACCTCACTTCCTTC          | GCGCATCAAAGCAACATTTA          | newly developed marker |              |
| Ad04A21094 | CTTCACTGTGAGGTGGAGGC          | CCCTCTTAACGCACTGTTATCAA       | newly developed marker | A04A552      |
| Ad05A5618  | GGGCTAAGATTCAACCTCCC          | TCCAGAATGCACTGAACTCAA         | newly developed marker | A05A179      |
| Ad05A8309  | TGCAAGAAGACGAAGAACGA          | AAAACGCGATGCAAAGTCT           | newly developed marker | A05A247      |
| Ad05A10356 | TTTTTGGTCGAAAACCACG           | GATGAGTGCCGGGAAGTAAA          | newly developed marker | A05A295      |
| Ad05A14690 | AACACCAAGTCGGACGTTTT          | GGGTTATTA AATTCGATGGACG       | newly developed marker | A05A405      |
| Ad05A17280 | TCCATCGAGGAATCACTCAAG         | GCGCTTGATTTTTAGCATGA          | newly developed marker | A05A485      |
| Ad05A18236 | TTTGTTCGTCGTTTGTTC            | CAGGGCGGAAGACAATCTAA          | newly developed marker | A05A728      |
| Ad05A18275 | CATCCAAATTTCTCACCTGCT         | TTGTGGGTCAACTCGGGTAT          | newly developed marker | A05A742      |
| Ad05A18337 | CTCGAGATTGAACTCCGAGC          | CACCACCCATCATTTGTAC           | newly developed marker | A05A760      |
| Ad05A18425 | AATGATGGCAACAACGTCAA          | ACCAGTGGATTTAGCGATGG          | newly developed marker | A05A788      |
| Ad05A18453 | GACCATTATGATAAAAATTTGCACC     | AAACAAATGCAATTTTCTCTCTC       | newly developed marker | A05A798      |
| Ad05A18493 | TTACGGCTCTGCTCCTCAAT          | AAGGGATGAGGAAGGAGGAA          | newly developed marker | A05A809      |
| Ad05A18501 | AAA AATTGGTCAAACCAGCG         | CGACGTTGGCTTAGGAGAAG          | newly developed marker | A05A812      |
| Ad05A18569 | AAGAAGCGGATAACTTCGTTTG        | CGAAATAATGCTCTGTTGTTGTG       | newly developed marker | A05A845      |
| Ad05A18658 | TTGTCCATAAATCCGTCGGT          | AGTCGACGCTGAAAGAGGAG          | newly developed marker | A05A884      |
| Ad05A18695 | TCATTGTTGGTAATAAGTTGGCA       | CAAATGCAATTC AACCGAGA         | newly developed marker | A05A890      |
| Ad05A18727 | AGTTGTTGATGGCTTTTGCC          | TGAATTGTTGACCATTTTTGGA        | newly developed marker | A05A897      |
| Ad05A18734 | TTGAGACTTCACGCAAGTGG          | AAGGTTGTGGGCTTCTATGG          | newly developed marker | A05A899      |

| <b>ID</b>  | <b>FORWARD PRIMER (5'-3')</b> | <b>REVERSE PRIMER (5'-3')</b> | <b>Source</b>          | <b>Alias</b> |
|------------|-------------------------------|-------------------------------|------------------------|--------------|
| Ad05A18820 | CAGCAATTAGTTTTAGAAGATGATGG    | TCTAACAGTGAGAATAAACGATTGG     | newly developed marker | A05A925      |
| Ad05A18845 | CAATTGTGGTCCCCTCCTTA          | AGAATCAGTGAGCACACCCC          | newly developed marker | A05A932      |
| Ad05A18924 | TTGACAAATTAATGTGAGTTACCAA     | CATAGCACACAAATTCGCACA         | newly developed marker | A05A956      |
| Ad05A18961 | TGCTGTTGGACTCAAAGGTG          | TGGTAGGAGGGGACAGAAGA          | newly developed marker | A05A963      |
| Ad05A19096 | TTTGTTGCAATTGATGACG           | GCCTCATTCGTTTTGGTGT           | newly developed marker | A05A1013     |
| Ad05A19116 | ACACCAAAAATTCGTTGCAT          | CGGTTCTCTTCTCTTCT             | newly developed marker | A05A1018     |
| Ad05A19142 | ACGCCCGAGTTGATCTTCTA          | CATCCATAAAGCAAGCCGAT          | newly developed marker | A05A1028     |
| Ad05A19190 | GCATTGGCATTGAAGTGAGA          | AATAACGTTAATGGGCGATCA         | newly developed marker | A05A1050     |
| Ad05A19203 | CGGACACTTTTGCCCTTTTA          | ACGGATCTCTCACCATGTCC          | newly developed marker | A05A1053     |
| Ad05A19244 | CACAGGGCAAAGAAAAAGG           | GCCAACTCTCATTGACACCA          | newly developed marker | A05A1066     |
| Ad05A19295 | AGAGGCAACGGTAGCAACAC          | TGGAGCATCAACAACAACAA          | newly developed marker | A05A1080     |
| Ad05A19296 | AGAGGCAACGGTAGCAACAC          | AAGAAGCAATTAATGGAGCATCA       | newly developed marker | A05A1081     |
| Ad05A19315 | AACCGTCTTAACAGCTTGCG          | TGACGTTACGAGCTACTGCG          | newly developed marker | A05A1092     |
| Ad05A19349 | GGGTGGCGTATAGGTTGCTA          | CGCCCTTCTTCTTATCC             | newly developed marker |              |
| Ad05A19382 | CCGACGATAACGAACCCTAA          | GATGGCGAGACACAAACAGA          | newly developed marker | A05A1111     |
| Ad05A19473 | ATTCGCCTTGAGAAAAGCAT          | CACAATGCAACAGAACGAAGA         | newly developed marker | A05A1146     |
| Ad05A19487 | ATGTTGCAAACATGCCAAA           | AACCACACTCTCTCCCCA            | newly developed marker | A05A1150     |
| Ad05A19710 | GGTTTCAACCTCACTGGCAT          | TCCAGCACTCAAGACCACAC          | newly developed marker | A05A1228     |
| Ad05A19823 | TGGAAGATGAAAATATCGGAAGA       | TGCTTATGGTGGTTATAGTGGC        | newly developed marker |              |
| Ad05A19912 | CAGCCAAACATTGTGATATGC         | GGATATTGCCTTGTTATGAACG        | newly developed marker | A05A1305     |
| Ad05A19999 | CACCAACATTGGTCATTTGC          | TCTCACACCAATTCACATCA          | newly developed marker | A05A1337     |
| Ad05A20012 | GAGAGTCTGAGAGGGCATCG          | TTATCCGTCCAAACCCAAAC          | newly developed marker | A05A1344     |
| Ad05A20046 | TGATAGAACTGCCGATCCAG          | TCGGACGGTTCGATTTTTAT          | newly developed marker | A05A1355     |
| Ad05A20084 | GGTGCATGGTAAAATGGCTT          | CGACCCTATGTGTACGATGG          | newly developed marker | A05A1368     |
| Ad05A20112 | GGTTTCGCGCATTTAACATT          | CAACCATGTCTTTACATTGCCA        | newly developed marker | A05A1378     |
| Ad05A20185 | CAGGGTATCCTTACAGTTCAA         | CATGATTTTGTCTTGCTCC           | newly developed marker | A05A1409     |
| Ad05A20222 | TTGTCCAGCTTGTAGGAGTTGA        | TTCAGATCCCCTCAGGTTTG          | newly developed marker |              |
| Ad05A20262 | CTGCAAAGAGCCAAGGTTGT          | GGGTTCGAACATTGGTGAAT          | newly developed marker | A05A1430     |
| Ad05A20396 | GCCGTGGCATTCAATTTATT          | TGGTTATTTTGGATAGTATGAGCG      | newly developed marker | A05A1471     |
| Ad05A20478 | CCGGTGTGTGCTCTCTTTT           | ACAATTGCATTCAACCCCAT          | newly developed marker | A05A1504     |
| Ad05A20499 | ACCAAGGAGAGGAGGAGGAA          | CGCGGGGCTTTACATTATT           | newly developed marker | A05A1507     |
| Ad05A20509 | ACGAGGAGCTGAGCAACAAT          | CCCTACCTTAGCCAAACCTT          | newly developed marker | A05A1510     |
| Ad05A20533 | CGGGTAATTTGTTGACTGGG          | TACCGCCACTGTCTGTTATCA         | newly developed marker | A05A1522     |
| Ad05A20570 | TGCCAAAACCTCTTTCGTT           | AAGCCAGGTAGCACCTCTT           | newly developed marker | A05A1530     |

| <b>ID</b>  | <b>FORWARD PRIMER (5'-3')</b> | <b>REVERSE PRIMER (5'-3')</b> | <b>Source</b>          | <b>Alias</b> |
|------------|-------------------------------|-------------------------------|------------------------|--------------|
| Ad05A20617 | TTCCAACACCAATTCATCCA          | GTGCCTCCTAATCCCCAGAT          | newly developed marker | A05A1549     |
| Ad05A20643 | TGCATTCAACAGCAAGGAAC          | ACAGGTTAGCCGTCATGGTC          | newly developed marker | A05A1558     |
| Ad05A20650 | TTGCCCTATATTCCTGCTC           | AAGGTGGTGTGGGATTACGA          | newly developed marker | A05A1562     |
| Ad05A20677 | TTTGGTCATTGTCAAAATCCTT        | TGCTGTCAAGTCATTTTACAGGAA      | newly developed marker | A05A1570     |
| Ad05A20734 | GCAGTACTGAGTGATGCGGA          | AAGGAGGTTAGCGTGTGGTG          | newly developed marker | A05A1590     |
| Ad05A20769 | AGTCCCTGTCACCAAAATCG          | CCGCTCTCTTCACTCCTCAC          | newly developed marker | A05A1601     |
| Ad05A20782 | CCATGTACTTATGTATGTGCGGATCT    | TGAGCAATTAATCTCCACTGTT        | newly developed marker | A05A1605     |
| Ad05A20785 | CCACACAATGCGTGTTTTCT          | GTTGTGAGTGTTGCAAGTGGG         | newly developed marker | A05A1606     |
| Ad05A20801 | GCCCTCTTCCCCTTATTTTG          | TTTGGCAAACAGTGATAGCG          | newly developed marker | A05A1612     |
| Ad05A20875 | CAAGTTCATGCATATTCAAGGC        | AATTTCAATTGATGCCGTGGT         | newly developed marker | A05A1624     |
| Ad06A4196  | CCCAATATAAAGGCCAGGT           | AAAAACTCCGTTTGCTGAACA         | newly developed marker | A06A137      |
| Ad06A5393  | CCCAGCATAAAACCAATTCAA         | TGTATGTATGCTGCTGTCTGAA        | newly developed marker | A06A169      |
| Ad06A10649 | CCTTTTTCAATCAAAGCACGA         | TGCCTTTATTTTGGTTGATGC         | newly developed marker | A06A265      |
| Ad06A16982 | GGAACCTCGAGGTTGGTGACT         | ATCCTTTCCCTGAGTGTGGCG         | newly developed marker | A06A431      |
| Ad06A17247 | TCTGAATTGAAAATTTCTGCATC       | AAATGGTGGCTTGCAATACG          | newly developed marker | A06A442      |
| Ad07A4990  | GACATGTACATTAAGACCAAAATCG     | ATGGCGTGAAAAGCAAGTTC          | newly developed marker | A07A169      |
| Ad07A9745  | GGATCGGGTCCGTAACATTAT         | CTCTCCAAATCATCATCCAACA        | newly developed marker | A07A292      |
| Ad08A3453  | CGTGGATAAAGTCAATCACCA         | AGAGGGATCAAGTGTGGACG          | newly developed marker | A08A90       |
| Ad08A4387  | CATGCCCATACATGAAATGC          | AAGCTGCGGCTTCAGTAATC          | newly developed marker | A08A119      |
| Ad08A4940  | TCCCTTCTCTTCCACGA             | AGTGTGTGTCTGCGTTGGAG          | newly developed marker | A08A138      |
| Ad09A3779  | TATCAACCGTTAACCGGAGC          | TGGCATGGAACCTAGAGTGA          | newly developed marker | A09A119      |
| Ad09A5979  | GGAGAAAGAGGGAAAAGGAAAA        | CTCCCCCTCTCCCCACTCT           | newly developed marker |              |
| Ad09A6009  | ACGATGATGTGCGAACAATG          | CAGGATCTTCAATACGAAGCAA        | newly developed marker |              |
| Ad09A6072  | GGGGTCAAGTTCTGAAACCA          | TTTTGTGCGAAGGTGTTTCTTGA       | newly developed marker |              |
| Ad09A6154  | ATGCTTGATGATGGTTGGGA          | CAAACATCAACACCCACCAC          | newly developed marker |              |
| Ad09A6233  | AAGATGCGAGGGGTTGTATG          | ATTGCAATGTTGACTGACG           | newly developed marker |              |
| Ad09A6425  | TTGGGTGCCTTGAATTGTAA          | TATAACCCCTGACCGAG             | newly developed marker | A09A195      |
| Ad09A6594  | TTCCATGAGAAAGGAGACGG          | CGACGACAGAGTTGTGGAAA          | newly developed marker |              |
| Ad09A6617  | TCTTCTTCTTCCCCCAT             | AGAGAGAGACTGGCTGGCTG          | newly developed marker |              |
| Ad09A6680  | GGGTGGAATGTAAGACCCAG          | CAAATTGCTATACTATTTTCACTCACA   | newly developed marker |              |
| Ad09A7328  | ACAGTCATCCATGGCAAAGC          | TGTAAACCCTCACGTTACATGG        | newly developed marker |              |
| Ad09A7483  | CAAACCAATCTAGCCCTAAGAGG       | TGGGCATGCATGAAAATATC          | newly developed marker |              |
| Ad09A7532  | TGGTCATCACTTTTAACCATCAA       | TGAAATTTAAAAGTGGTTGGTACAC     | newly developed marker |              |
| Ad09A7577  | CATCATGGAGGGCTTCCTTA          | TTCAATCCCTTTTCAGGTTCG         | newly developed marker |              |

| <b>ID</b>  | <b>FORWARD PRIMER (5'-3')</b> | <b>REVERSE PRIMER (5'-3')</b> | <b>Source</b>          | <b>Alias</b> |
|------------|-------------------------------|-------------------------------|------------------------|--------------|
| Ad09A10442 | ACGCAAAAAGGGAGGAGAAT          | ACATACGCGTGGAGCTTCTT          | newly developed marker | A09A282      |
| Ad09A18059 | CGAGAAGATGGCACAAATCA          | TCTTCGTCTTCATCCCCAAG          | newly developed marker |              |
| Ad10A3962  | GTGATGATGGAGTGGCAGTG          | TTTTTCGCTCCAAAATGGTC          | newly developed marker |              |
| Ad10A4326  | CGCGAATTCGAATCTCCTAT          | TTGATGCACAAAACAAAAGC          | newly developed marker |              |
| Ad10A4720  | AACGGGCTAAAACCGCTAAT          | TCACGGAAGGTGATGATGAA          | newly developed marker |              |
| Ad10A10685 | CTAAGTGTGCACGGTTTCCC          | CATGCATCTTCTTTCCAATTCA        | newly developed marker |              |
| Ad10A15687 | TGCCCTATCCATGCTTCAAT          | GTAGGACTGCCCCGGTGTATC         | newly developed marker |              |
| Ad10A18338 | AAGGGGCCACTTTGTATTT           | GGAATTACAAGCTGAAAATCACTC      | newly developed marker | A10A449      |
| Ai01B7136  | TCTTTGGAGGTTTTTGGTGG          | TCCTCTTTATTTTGAAACATTCTCTTT   | newly developed marker | A01B163      |
| Ai01B7542  | CTTGCGGTTGTTGTTGTTGT          | GGGTACAAGTCAAGGAAAGCC         | newly developed marker | A01B172      |
| Ai01B8018  | TGTCCCTTAGCCAAAGATTCA         | GGTATGGTCGGCAAGTCAGT          | newly developed marker | A01B185      |
| Ai01B9867  | GCTTACCACCGCCATAC             | CCCAGAATCAGCAACAACAA          | newly developed marker | A01B213      |
| Ai01B11694 | GACCCTGCATGAACAGGATT          | AAAAACTGCTGAATGGTCCG          | newly developed marker | A01B252      |
| Ai02B2350  | GGTTACATGCTGCCGAAAAT          | TTCTCGTCGTCATTGCTGAT          | newly developed marker |              |
| Ai02B2356  | CTCTAGGCTTGGGAGCTTCA          | ATCTCTGGCGACGGAGGTAG          | newly developed marker |              |
| Ai02B2534  | GAGAGAGCATGGGAGAGAA           | TCCATTGCTTTCGTTCCCTTT         | newly developed marker |              |
| Ai02B2634  | CTGCGAAGTTAAGGCAGACC          | TGGTTCATTTTGAGGCCCTA          | newly developed marker |              |
| Ai02B4199  | GCTTATATAAAGGAAACGTGGCA       | AGGGGTAAGCTTCGTTTCAA          | newly developed marker |              |
| Ai02B4457  | TTGAGGTAAATCTTCCCAACC         | CAATTTGCACTAAGCCACAAA         | newly developed marker |              |
| Ai02B6837  | TGAAGAACAAGACGATCATTAAACAA    | GCTTGATTTCAAAAACCATGAA        | newly developed marker |              |
| Ai02B7519  | CTTCTCCGATGAACTAGCGG          | GAGAAGCGATGCGAAGAGAG          | newly developed marker | A02B174      |
| Ai02B7886  | GCAAGCCCGTATGCATTTAT          | CATGCAACTACCCATTCTC           | newly developed marker |              |
| Ai02B8213  | GGGGAGAGAGAGGGAGAGAA          | CCAGTTAATCAAAAACCAAAACCA      | newly developed marker |              |
| Ai02B8654  | TCTGAGCTACATCGCCACTG          | AGCCAACCCCATCTAGTACG          | newly developed marker |              |
| Ai02B11533 | AAACTCAGTTCGTCATCGCA          | TCAGCAACAACAATATTCCACA        | newly developed marker | A02B234      |
| Ai02B17748 | TTGCCATCGGATGTATTTGA          | TCACAACGGCACCTGTTTTTA         | newly developed marker |              |
| Ai02B18857 | TGCACCATTTTAACCAATTCA         | TAGAGAGGGAGAAAAGGGGG          | newly developed marker | A02B349      |
| Ai02B19680 | ACTAACAACGAAAGGGCCAA          | CATATTGAATTGAACATCCGACA       | newly developed marker |              |
| Ai02B20354 | TAGAGTTCCAAATCCGGACG          | GAGGAACATAAAAAGTGCACGA        | newly developed marker |              |
| Ai02B20508 | CCCGGATTTGATGAGTTAGC          | CTGCTTCAACGAAGACGATG          | newly developed marker | A02B379      |
| Ai02B20641 | TTTTCTCCATTTATTTTCAATTTACG    | AGCGCGTGTACATGCTTTTTT         | newly developed marker |              |
| Ai02B21379 | AACGTCCAATCAATAAACCAAA        | GGTTGGTCCAAGCTCAAGAA          | newly developed marker |              |
| Ai02B21536 | TGCGCATTAATGAGAGTGAAA         | GAAGAAGAAGGAACGCGAAA          | newly developed marker | A02B406      |
| Ai02B21538 | TATCAGGCGCGTTACACATC          | GAAGAAGAAGGAACGCGAAA          | newly developed marker | A02B407      |

| <b>ID</b>  | <b>FORWARD PRIMER (5'-3')</b> | <b>REVERSE PRIMER (5'-3')</b> | <b>Source</b>          | <b>Alias</b> |
|------------|-------------------------------|-------------------------------|------------------------|--------------|
| Ai02B23281 | TTGCACATGAGACAAAATGAAA        | ATAGAGAAGCTCGGCCTCAA          | newly developed marker |              |
| Ai02B25013 | GGGGAACATAATGATTGGTGTG        | TCCCTATTTTCCCCAAAACC          | newly developed marker |              |
| Ai02B25100 | TGTTTTTTCAGATGCAGGTGC         | CAAGCTCCAGAAAGGTCGAG          | newly developed marker |              |
| Ai03B32338 | TGCATTGCATTATTTTGTGAA         | CATCAGGGTCGATTTTCGATT         | newly developed marker | A03B820      |
| Ai03B33341 | CCCACCCAAATCCCCTATAC          | TTTTATGGTAAAATTGTTAGAACGTCA   | newly developed marker | A03B842      |
| Ai04B16    | ATGACCATCACTGCTCCACA          | GGACTGGGGATTGCATAGAA          | newly developed marker | A04B01       |
| Ai04B2241  | TTCGACCATGTGAATGAAGC          | GCCCGGGCTCTAACCTTAAT          | newly developed marker | A04B56       |
| Ai04B4849  | GTGCTTTTTGCAGTTTCTCC          | TTGAGATGGCAAGGTATTACGA        | newly developed marker | A04B112      |
| Ai04B5526  | CACGCGCTCATATAACGTA           | AACGCAAACAGAGGAGAACAA         | newly developed marker | A04B133      |
| Ai04B9397  | CCAAAGAAGTTGCAATGACG          | CTCCGCTTAAGAGCAGAGC           | newly developed marker | A04B207      |
| Ai04B12763 | AAGGGAGAGAGGGGGAAGA           | CCTCCAATCTCTTTTTTCCCTA        | newly developed marker | A04B267      |
| Ai04B17746 | GAAGAAAACCTGCGTGTGC           | TTAAATCACGCGCTCCTTCT          | newly developed marker | A04B345      |
| Ai04B19238 | CATTTTGGGGTTTTACTTTTGG        | ACTAGGGCTGTCCGGAGAAT          | newly developed marker | A04B363      |
| Ai04B20539 | AACAGCAAATCCTGCCTCAT          | CCATTTTCGTTACAAAAGTGCAA       | newly developed marker |              |
| Ai05B5265  | CACGCACTAGATCTTCTTCTCC        | TGTTGGTGATGATGATAATGGAA       | newly developed marker | A05B133      |
| Ai05B9660  | GACGAGAAACCTTCCCATGA          | GACGAACCTTGCCCAAATACC         | newly developed marker | A05B217      |
| Ai05B12077 | CAATGGATCGCCCTAAAAGA          | TTTTTGCATCGTACCTTGTTT         | newly developed marker | A05B258      |
| Ai05B15046 | CGCCCACTGACTTCCAAATA          | TATTGACGGCGATTACGGTT          | newly developed marker | A05B302      |
| Ai05B19811 | GGGGAAATGTAGGAGGGAGA          | TACCTTACCCCAACCCCTTC          | newly developed marker | A05B384      |
| Ai05B25638 | GGATTGAAGGCTTGAAGCTG          | CCGCTAGTTTCTCTGTGCT           | newly developed marker | A05B485      |
| Ai05B26922 | GTGTTGGTGCGATGATAACG          | AAGTCCAACAAGTCATTTACTCA       | newly developed marker | A05B517      |
| Ai05B28050 | AAATATCCGCCGGTAAATCC          | AATGGTGGCAGAGGCAATAG          | newly developed marker |              |
| Ai05B32361 | AGGGACGGAAGATGGGTATC          | AGAGTGTGTGGGGAGTGAGG          | newly developed marker | A05B645      |
| Ai06B7451  | CATCAACATAGCAAAAATTCAACA      | ATCGTTACTGTTGTCGCCAT          | newly developed marker |              |
| Ai06B13545 | AGCCAATGCCAGTAGCTTGT          | CGTAATTAGTCTGGCCCCAT          | newly developed marker |              |
| Ai06B19288 | TTGAAAAATAAAAGGAAAGGAGGA      | TTCCGACAGAACGAGAGGTT          | newly developed marker |              |
| Ai06B27638 | GGAGAAAGAGAGAGAAGAGGGC        | TGAACCAAACCTGCTTTGTCAT        | newly developed marker |              |
| Ai06B29598 | TGCTTCTTGCTTTCCTGCT           | CCACCAACATTACCACCACA          | newly developed marker |              |
| Ai06B29716 | ATGACTAAGCCACGTTTCC           | GTGAGATAAAAATTGTAAGACTCCAAA   | newly developed marker |              |
| Ai06B30789 | GCATTTGTTTTGAATGAACAAAGA      | AAGATCTGCCCTCATTTTG           | newly developed marker |              |
| Ai06B31304 | CGCATACAAGCGATTAAGGC          | GAGGAAGAAGAACGTGCAGC          | newly developed marker |              |
| Ai06B32416 | CAAGCCAAAACTCAGTCCA           | GCTCCATTTTGAAATCTCCG          | newly developed marker |              |
| Ai07B12485 | TTTGTCAATTGAAGAAAAGGAGA       | TAGGCAGATTGCACCTGTGT          | newly developed marker | A07B265      |
| Ai07B23662 | AGAGGGATCAAGTGTGGACG          | TGCAAATATCTTGTAATCCCCA        | newly developed marker | A07B505      |

| <b>ID</b>  | <b>FORWARD PRIMER (5'-3')</b> | <b>REVERSE PRIMER (5'-3')</b> | <b>Source</b>               | <b>Alias</b> |
|------------|-------------------------------|-------------------------------|-----------------------------|--------------|
| Ai07B26726 | ATGATTAACCCCCACACGAA          | TCGCCATACATGTGTGTAAAGA        | newly developed marker      |              |
| Ai08B2682  | TGGATGCCTATGCTGCTAAA          | GCTCTCGTTTTGGTTTCTTCG         | newly developed marker      | A08B47       |
| Ai08B8719  | TGCAGAAATTAGGGGATTAGTG        | CACGTTGATCTATTAGTGCCG         | newly developed marker      |              |
| Ai08B11147 | TTTGTTTTATCCAGCAGCCC          | AGCATCCCACCGAATCTAT           | newly developed marker      | A08B222      |
| Ai08B16802 | ATGCATACATGCCACGTTTC          | GAGCTTTCTCTGTAAGACTCCAAA      | newly developed marker      |              |
| Ai08B23999 | TGTTCCACAACAAATTCACAA         | CTTCACCACCGCCATACC            | newly developed marker      |              |
| Ai09B5213  | GCGATAATGATAAACTTGAGTGGA      | TGCCAAACTTCAAAGACAGAAA        | newly developed marker      |              |
| Ai10B6334  | TGAAATGGTGGCTTGCAATA          | CCTCTCTCTCCATCGCTCAC          | newly developed marker      | A10B119      |
| Ai10B9706  | TCCTTGTGGTTGATCGCATA          | TCAGAAGTAGCGCAGCACAT          | newly developed marker      | A10B181      |
| Ai10B10082 | GTGTGTTGGTGGGTTTTCAA          | CCCTTCTCCCAATTTTTTC           | newly developed marker      | A10B194      |
| Ai10B12455 | TCAAGCCTCATGTCAAGCAC          | CTGGTAAGAGCACTGGCACA          | newly developed marker      | A10B227      |
| AC1D11     | TGCAGAGAGGTTGGATGGAGTA        | CCCGCTAATCCCCGAAGT            | Moretzsohn et al. (2005)    |              |
| AC2B03     | CTCGCTATACTAGGTTTTGGGTGT      | TGGTTTGCCTTTCTAGCCATTA        | Moretzsohn et al. (2005)    |              |
| AC2C05     | CAAGGAAGCGTGAATTGTTAG         | TGTGGACTATGCTTGTCATGTT        | Moretzsohn et al. (2005)    |              |
| Ad90F2     | CTCAATGGCCGGTATGATTAGT        | TTGAGATAACGCTTCCGAAAAT        | Leal-Bertioli et al. (2009) |              |
| Ad91I24    | TGTCCGCCAAGTTTTACAGATA        | CAGCTTACACTGGCATGTTCTC        | Bertioli (unpublished)      |              |
| Ag39       | TGTAGTCAGCTGCTCCAAAA          | ATGAAAGTTCACTTGAGCAAA         | Hoshino et al.(2006)        |              |
| Ag49       | TGAAATGGTGGCTTGCAATA          | CCTTCTCTCCATCGCTCAC           | Moretzsohn et al. (2009)    |              |
| AGGS0005   | AATAGTATGATGGTGCGGTGGT        | AGGGTAGAGGTTGGAGAGAAGG        | Huang et al.(2016)          |              |
| AGGS0013   | AATCCGACACAACGATAAGAGA        | ATTGCCATTAGCATTTACG           | Huang et al.(2016)          |              |
| AGGS0022   | ATTCGGTTCTTACATTCCCAAC        | ATTCAAACGCAAACCCTTCTTC        | Huang et al.(2016)          |              |
| AGGS0058   | CTGGCCACCTAATCTTTCTGTT        | GATTCCATGCTCCTCCACCTC         | Huang et al.(2016)          |              |
| AGGS0060   | GTTGGGCCATCTTAAGAACAAG        | TAGTCTAAACGTTCCGGGACCA        | Huang et al.(2016)          |              |
| AGGS0100   | CAGCACTAAATCTCCAAATCCA        | CACTGGCAGAGATAGGAACCTT        | Huang et al.(2016)          |              |
| AGGS0187   | CCCTCATTTCGAATTCACTCAC        | ATAGCAGCGACAGCAACATTTA        | Huang et al.(2016)          |              |
| AGGS0243   | CGCCGCATCCTACTACTACTG         | CTTTCACGTGTCTTCCCTCTGT        | Huang et al.(2016)          |              |
| AGGS0244   | GGTGAGGCAGAGGGATATGTAG        | TCGTTCTTCCCACTCTCAAGTT        | Huang et al.(2016)          |              |
| AGGS0281   | ATTAGACCGAACGAACCGAAGT        | CTTTCACTTCTTCCACCAC           | Huang et al.(2016)          |              |
| AGGS0284   | AGTGAGATCAGAAGCAGAGCAA        | AGGCCAGGAGAGCTAAGTTTGT        | Huang et al.(2016)          |              |
| AGGS0285   | AACACACACGCACTAGCAACTT        | ACCAAACCAAGAAGGTGAAAAGA       | Huang et al.(2016)          |              |
| AGGS0297   | GATGGAAGAATCCGATGGTATC        | TGAGAGCAAACAAGGAGAGAGA        | Huang et al.(2016)          |              |
| AGGS0300   | GCAAAGACGATTAGCTCAGAGA        | ATACTCCTCCTTACCCATCCT         | Huang et al.(2016)          |              |
| AGGS0302   | CTCTCTCTCTCTCGCCTGAC          | TATCGTTCGACGCTGTAAATGAG       | Huang et al.(2016)          |              |
| AGGS0311   | GGTGAAATACACAAGAGGAACG        | CAAATACTCAAAGCCCAAAGGA        | Huang et al.(2016)          |              |

| <b>ID</b> | <b>FORWARD PRIMER (5'-3')</b> | <b>REVERSE PRIMER (5'-3')</b> | <b>Source</b>      | <b>Alias</b> |
|-----------|-------------------------------|-------------------------------|--------------------|--------------|
| AGGS0329  | CTGGAACCATAAGCTGTCATCA        | TTCTCACACATGCACTCAGAAA        | Huang et al.(2016) |              |
| AGGS0331  | AGGAGGAGAAATTCGTCATCAG        | AAGCGTAAAGCTCTATGTGGTAGA      | Huang et al.(2016) |              |
| AGGS0333  | TCAGCCAATAAATCTGACGGTA        | GGAGGTTGACGGAGAGGAGATA        | Huang et al.(2016) |              |
| AGGS0337  | GGAATTACAAGCTGAAAATCACTC      | GGAATTACAAGCTGAAAATCACTC      | Huang et al.(2016) |              |
| AGGS0339  | CCCTAATATTCGGCCATCCTTA        | TGGTATGAGAATGAAGAGGAGGA       | Huang et al.(2016) |              |
| AGGS0346  | GTGGTGCTGGTGCTATTGAGT         | CAACTACCCTTCTCTCCACCAC        | Huang et al.(2016) |              |
| AGGS0351  | GCCACTAGATTATAGCGACTCCA       | TTGCACTCTTCTTAGGTCATGTG       | Huang et al.(2016) |              |
| AGGS0358  | GTGCCATACTAGTCGAGGGATT        | TGTAGTGCCTTGTCACCTCTGT        | Huang et al.(2016) |              |
| AGGS0385  | GCCGATAACAAGAACCTCATCT        | TGAGTGGTGCTTACATTTCTATGG      | Huang et al.(2016) |              |
| AGGS0389  | CCGCTCATTTGATCATAAGCAT        | TGGTGTTTGCTTTCAGAGTTGT        | Huang et al.(2016) |              |
| AGGS0396  | CGTCGTCCATGTAATTTTCAGTC       | TCTATTGTTGCATGAGAACGTG        | Huang et al.(2016) |              |
| AGGS0399  | TGAGGAGCCTTGAAAGATAGGT        | CAGGTTGAGTTCGGAATTTGAT        | Huang et al.(2016) |              |
| AGGS0408  | ATTTGCTCTTTGCTGAAGGAAG        | CCCGTAAGGGCTTAACTTCAAT        | Huang et al.(2016) |              |
| AGGS0429  | GTGTGGAATGTGGTGCATTAAG        | CCACATTCATACCCATAAGCAT        | Huang et al.(2016) |              |
| AGGS0440  | TCTTCACCCTATCACAGCCTCT        | GGCTAATTGTCCCTAGGATAGGA       | Huang et al.(2016) |              |
| AGGS0449  | CACAGTATTAGGGTTACAAGTTGC      | ATTATGCGTCCAAACTCGAACT        | Huang et al.(2016) |              |
| AGGS0617  | TGGAGTCCCTAGATCAAGATGC        | ACCAAACCATCCCATCAGTTAC        | Huang et al.(2016) |              |
| AGGS0627  | ATCATCACCTTCACCCTTTGTT        | AAGCTAATGCACCAACAAATCC        | Huang et al.(2016) |              |
| AGGS0633  | ATACCAACCCACCTAGCAGAAA        | ATCGCCTTCAGAAGTATGTTCC        | Huang et al.(2016) |              |
| AGGS0638  | GGTTGGTGGCTTCTATGATTTT        | CGTTCTCTCATTTCGTTTATTCA       | Huang et al.(2016) |              |
| AGGS0670  | CTTCTCCTGGCAATGTATTTCA        | GCCCTGCTTTCTGTATTGTCTT        | Huang et al.(2016) |              |
| AGGS0672  | CTCAGTCGTGCTTCAAATCTCA        | ATGGAGCTTCTAGGTGCAAATG        | Huang et al.(2016) |              |
| AGGS0673  | AATGAAAGAAGGAAGGGAGGAG        | GCGCGACAAGTATCCGTATT          | Huang et al.(2016) |              |
| AGGS0675  | TCCCACATCACCGTCACTATTA        | CGTGTCTCCTCCTTGAAGATA         | Huang et al.(2016) |              |
| AGGS0694  | AAGCGTGAAACCTACTCTGCTC        | TCATCACTCTCACACCCATCTT        | Huang et al.(2016) |              |
| AGGS0720  | CGTCAGTAACTGCGAATGAAAC        | GGAGCACGCAATTAAGAGAAGA        | Huang et al.(2016) |              |
| AGGS0738  | TTGAAGTAGTGGTGATGGTGGA        | GAGGTTGACTTGGAGAAACAGG        | Huang et al.(2016) |              |
| AGGS0815  | TCTCCAAGACGATCCATCTAAA        | TCTGTTCTACAAGGACCAGCAA        | Huang et al.(2016) |              |
| AGGS0833  | TCTGATTCCAAAGATGACGTGT        | AGTCAAACAAGAAGCTCGTTCA        | Huang et al.(2016) |              |
| AGGS0940  | TGCTCTGCTACTCTTCAAACCA        | CCCAATGTGTGATCAATTACGA        | Huang et al.(2016) |              |
| AGGS0955  | GACCCATCTTACCCAACAGAAG        | GTGAAAGGCATCATCAGAAACC        | Huang et al.(2016) |              |
| AGGS0957  | GAAGATTTATGGAAAGCGGATG        | GTGGAGACAAAGGTGCACAATA        | Huang et al.(2016) |              |
| AGGS0960  | GCGGCTTACTCTTGTGTTGTAGG       | TCCCTTCTACACAGACATCCAA        | Huang et al.(2016) |              |
| AGGS0973  | GCCATATCGATCGAGGAATTAG        | CCCACATTTCTTGTGATTGTGT        | Huang et al.(2016) |              |

| <b>ID</b> | <b>FORWARD PRIMER (5'-3')</b> | <b>REVERSE PRIMER (5'-3')</b> | <b>Source</b>      | <b>Alias</b> |
|-----------|-------------------------------|-------------------------------|--------------------|--------------|
| AGGS0977  | GTGTTTGATTGAGCCTTTGTCA        | ACACGCACGAGATACATAGTGG        | Huang et al.(2016) |              |
| AGGS0978  | TTTCCTTCCTTCTCCTTTGTCT        | TCTAGAAGAGGAGGATCAGTAGGC      | Huang et al.(2016) |              |
| AGGS0979  | GTTGCCTGAAAGGATTTACCTG        | CAGCAAGTTGCATTGAGAATGT        | Huang et al.(2016) |              |
| AGGS1003  | GCTTGAAGAAGATCGAGCAAC         | CTGAACCCGTCGTCTCTGTC          | Huang et al.(2016) |              |
| AGGS1005  | CCAAGTTGGTATTCTCCAAAGC        | GGGTTTGATTTGGGTGATTAGA        | Huang et al.(2016) |              |
| AGGS1013  | AGGAAGGATAAGCAGGCAAAC         | TGGCATAAGTCTTAGGGTTACAC       | Huang et al.(2016) |              |
| AGGS1014  | GTGAAGTGGTGAGTGAGTGAGG        | ATGTAGAGACGACACCCATGCT        | Huang et al.(2016) |              |
| AGGS1054  | GACTCTGCTCCTCTCCTCTAGC        | TCCACACTCATGCGTACTAACC        | Huang et al.(2016) |              |
| AGGS1056  | CGGCATGACCTACAATACT           | TGTGCTCCTTCTTCTTCTTCTC        | Huang et al.(2016) |              |
| AGGS1064  | TGCTAGGTCGCCACTGTTACTA        | TAGCAATTCTGCAACAACAACC        | Huang et al.(2016) |              |
| AGGS1076  | AGAAGAAATGGCCTACTGGTGA        | CTGTCATCTCCTTGCTGTAACG        | Huang et al.(2016) |              |
| AGGS1101  | ATAATTTCTGGAAGCCCAAGGT        | TGCTTCCAAGACTTCAAACCTCA       | Huang et al.(2016) |              |
| AGGS1102  | CATGAACAATTACACCCAGTCA        | CTTGTCAAACTCTGTGACTTAGCA      | Huang et al.(2016) |              |
| AGGS1118  | AGGTGTTCCCTCTGTGGTCAGTT       | TGGTTATGGTTCTCTCATCTGG        | Huang et al.(2016) |              |
| AGGS1122  | CACTCCATCATCTAAGGGTCAA        | ACCTATTTCCCAATCATCATGC        | Huang et al.(2016) |              |
| AGGS1124  | CAAAGCAAAGAAGGGTAAGGAA        | GCACAAGATAAACCACGAAATC        | Huang et al.(2016) |              |
| AGGS1137  | TTCTACCTTTGTCCCAAGAAGG        | AACTTTGGAGAATTGCTTGCTC        | Huang et al.(2016) |              |
| AGGS1160  | GTGTCTTGTTGTGTCCGTATCG        | AGGCAACAGAATGGAGAGAGAG        | Huang et al.(2016) |              |
| AGGS1167  | TTCCATCTACCTCGCAGAAAGT        | TTACCCTTTCCCTCTCTGCTTT        | Huang et al.(2016) |              |
| AGGS1183  | GGGAGAGAGAAGAGCAGGAGA         | CTCCCTCCCTTCCATCCTTT          | Huang et al.(2016) |              |
| AGGS1187  | CTAGGGCTTGGAAGTGAGAGAA        | GGTGCTGCTGTTACCGACTTAT        | Huang et al.(2016) |              |
| AGGS1193  | GGGCTGCTCTTGTCTCTACTAGG       | ACTCGTCCTCTTCTCCTCACC         | Huang et al.(2016) |              |
| AGGS1194  | CCCTTAACACACACACAAGGAA        | TTAGACCGAAAGGAGCGAGTAG        | Huang et al.(2016) |              |
| AGGS1197  | CGTCCTTCTTCTTGGTGAACCTC       | AGTCATCATTGAGCATCGTGAG        | Huang et al.(2016) |              |
| AGGS1211  | GAACAGCTTTGTGGTGTGACAT        | ACAGACATAACAGTCAGTTTCACC      | Huang et al.(2016) |              |
| AGGS1213  | CATGGCAGTAGTAGCAGCAGAG        | GTGACGTTGAGGGAGAGAGAAG        | Huang et al.(2016) |              |
| AGGS1233  | GTACCACCATGGCACCTTCT          | TTCATCACTCACATCTACCTCACA      | Huang et al.(2016) |              |
| AGGS1238  | CTTTCCTAATACGAGCAACACA        | CGTAGGGAGAGAAAGTGAAAGA        | Huang et al.(2016) |              |
| AGGS1243  | AGTGTTTGAACAGAAACGCAGA        | TGGGCTAACTTACACCAGGTAGA       | Huang et al.(2016) |              |
| AGGS1254  | ACCAAGAACGAAGTAGCTGCAA        | AAGTCATTGCTAGAGCCCATGT        | Huang et al.(2016) |              |
| AGGS1262  | AGAGGGAAGAGAACTGACCA          | AAGGATTGCACTACGGGTAAA         | Huang et al.(2016) |              |
| AGGS1276  | GCGAAATTGGAACAGTAAGAGG        | GCAAGCCTACCAAGAGAAAGAA        | Huang et al.(2016) |              |
| AGGS1283  | CGCAAAGTCCAAGTTCTGGTA         | CTCATTGATAGCAAGGACCTGA        | Huang et al.(2016) |              |
| AGGS1299  | GTTGCTCCGATTTCTACGTTTC        | GCTTTGGTAAACATCCGATAGC        | Huang et al.(2016) |              |



| <b>ID</b> | <b>FORWARD PRIMER (5'-3')</b> | <b>REVERSE PRIMER (5'-3')</b> | <b>Source</b>      | <b>Alias</b> |
|-----------|-------------------------------|-------------------------------|--------------------|--------------|
| AGGS1307  | TTGGTGAATGACTTAGGAACGA        | ATGGGCAGAATGGTAAATGAAC        | Huang et al.(2016) |              |
| AGGS1312  | CGGAATTAATTGTTAGGGACCA        | CCACCACTACTACCATCGTCTC        | Huang et al.(2016) |              |
| AGGS1317  | AATGCGTGCACCTTCAGTAAC         | TTGTGGTTCTGTCTCTCAGTC         | Huang et al.(2016) |              |
| AGGS1321  | TCCTTCTCCCTCTTCACATCTC        | AGAAGAGAGAGCCGCCGTAT          | Huang et al.(2016) |              |
| AGGS1324  | TGTGTGTGTGTCAGTGTGTGTG        | CATGTAGTGTACACAGGCAAATCA      | Huang et al.(2016) |              |
| AGGS1325  | TTTGAAAGACCCACACTCTCTC        | GGTTTGGAGAAGAGAGATGCAC        | Huang et al.(2016) |              |
| AGGS1344  | TTTAGAGAGCCTTACCACCTTCC       | GCACTAATCCCTCGATTTCATTC       | Huang et al.(2016) |              |
| AGGS1355  | TTAGACCGAAAGGAGCGAGTAG        | TTACACCCTTTAACACACACACG       | Huang et al.(2016) |              |
| AGGS1356  | TTGTTGAATGTCTCCAGAATGG        | ATTCACACAACCACCCACATTA        | Huang et al.(2016) |              |
| AGGS1359  | CACATTCTCTGCCATTGAACAT        | TGGTAGACCAAAGAAAGCTGAA        | Huang et al.(2016) |              |
| AGGS1363  | GACAACGTGTAGTAGCGACAGC        | TTTCGCTGGTAAATCCGATAGT        | Huang et al.(2016) |              |
| AGGS1365  | GATATTGAGGTATGGCGTCGTT        | TTCAGATGGCAGTAAGTGTTC         | Huang et al.(2016) |              |
| AGGS1369  | AACTGGTGAAATGGAGTGGAGT        | TTTAACCTCCCTTGTGGGTATG        | Huang et al.(2016) |              |
| AGGS1370  | CAAGGAGAGCTTGGACACCTAT        | CAGGAGGATACTTCTGAGCAT         | Huang et al.(2016) |              |
| AGGS1376  | GGGAAGAAGTGGAACAAACAAA        | CGCTCTACACTCCTTCTCCTTC        | Huang et al.(2016) |              |
| AGGS1378  | TGGTACTATCCCGCCATAATTT        | GGGTTAATTCAACATGGGTCTC        | Huang et al.(2016) |              |
| AGGS1389  | GCAGTGCAAGCGTTGATAACTA        | CCTTATCTTCTGAAACGCCATT        | Huang et al.(2016) |              |
| AGGS1393  | GAGAACATGGTTCGAAGAAACC        | CACCGTGTTGTTATGTTGTTCC        | Huang et al.(2016) |              |
| AGGS1400  | ATAACTCCCGGATCATGCAA          | ATGTTGTCTTTCTCCCGATCTC        | Huang et al.(2016) |              |
| AGGS1403  | CTAAGCTTGTTGCTTCCATTCC        | GTTGTCTGCAAGAGGTTGTCTG        | Huang et al.(2016) |              |
| AGGS1425  | CATCAGCGCAGGATAAATCAA         | CTGAAGGAGTTTGCAGGAACTT        | Huang et al.(2016) |              |
| AGGS1431  | TTCCTTCTCCTCTCTCCTTCTTC       | AAGGGATAGAGTGGGAGCAAAG        | Huang et al.(2016) |              |
| AGGS1432  | GCTTCTCTCCACCACTATTACCA       | AAGAGAGGAAGGTGAGGAGGAT        | Huang et al.(2016) |              |
| AGGS1438  | GTCGTCTCCTCTGTTTCGAGTG        | AGACAAGGAGGAGGAGGTGATA        | Huang et al.(2016) |              |
| AGGS1442  | TTCTTGTTCTTCTCCATGCTCA        | TGCACTACCTTCAATGTTACCG        | Huang et al.(2016) |              |
| AGGS1450  | GGAATCAAACACAGGATTCACA        | GTGAACTGAGCACAAACTCAGTAA      | Huang et al.(2016) |              |
| AGGS1451  | AAATCCCTAGCCTCTCAAGACC        | GGGAAGTGTGTGGATTAGGAAG        | Huang et al.(2016) |              |
| AGGS1453  | CGGATGATTATGTCCTCCACTT        | TCATTCACTTCCCTCATTCTGA        | Huang et al.(2016) |              |
| AGGS1461  | CATGAGCGATGACAAAGATAGC        | TCTGTTCGCAAATTTGAGTTACC       | Huang et al.(2016) |              |
| AGGS1464  | GGCAGAAAGGGATGTTTCGTA         | TGTGTCTGAGCTCACTTCTTGT        | Huang et al.(2016) |              |
| AGGS1466  | GGAAGGGAGAGAGATAACGAGA        | CTTCTTTCACTGCATCCACCTT        | Huang et al.(2016) |              |
| AGGS1468  | CTAACCAACGAAGCCATAGAA         | TGATGAAATGAGCAAGTGGAAC        | Huang et al.(2016) |              |
| AGGS1479  | GTTTATCACACGGATGCGTCA         | GGGAGACAACCCACCATAGTATT       | Huang et al.(2016) |              |
| AGGS1481  | CCATCGCGAGTGTATAAGAAAG        | TCTTTGACACTACCATTGTGGA        | Huang et al.(2016) |              |

| <b>ID</b> | <b>FORWARD PRIMER (5'-3')</b> | <b>REVERSE PRIMER (5'-3')</b> | <b>Source</b>      | <b>Alias</b> |
|-----------|-------------------------------|-------------------------------|--------------------|--------------|
| AGGS1483  | TCTCTCTCTCTCGCCTTAAA          | GAAATCCTTTGAAGGTTGTTGG        | Huang et al.(2016) |              |
| AGGS1484  | TTTGCTCCAACCTCAATTTCT         | GCCGTAAGCGAAGAATAACAA         | Huang et al.(2016) |              |
| AGGS1495  | TTCTTCTTCCCTCCCTCTCTGTC       | CTTCACACACAATCAGCTCACA        | Huang et al.(2016) |              |
| AGGS1498  | CTCTGTTCCCACCACTCTCACT        | TCTTCTTTGAATACGCGAGAGA        | Huang et al.(2016) |              |
| AGGS1512  | CTTGTTTAAAGTAAACGCTGCAT       | ATGAAAGAGAGACTGCGAGGTT        | Huang et al.(2016) |              |
| AGGS1513  | ATGCTTCTGCTTCTGCTTCTCT        | AAATTATTCTGCGGTCCTCGTA        | Huang et al.(2016) |              |
| AGGS1518  | TGGTCTCACGTTGGACTTTGTA        | TCCATTTCTCCCTCTCTTTCAA        | Huang et al.(2016) |              |
| AGGS1532  | CATGTGATTGGTTCGTCATCTTT       | AGGATCTGCCAAGAGTTAATCG        | Huang et al.(2016) |              |
| AGGS1533  | CACACACACACACACACACACA        | AGGCAAAGTGGTTACTGGGTTA        | Huang et al.(2016) |              |
| AGGS1542  | AGAGAAGGAACAGGTGTGAAGG        | ATTGCCATCTCCTTGTGATCTT        | Huang et al.(2016) |              |
| AGGS1568  | CTACAGCTATGCAAGCAACGAC        | GGTGGCCTCTATCATCATCATC        | Huang et al.(2016) |              |
| AGGS1569  | AGGCTGATCAATCTTCAACTCC        | TCTCAAAGGTGCTTGATTTGC         | Huang et al.(2016) |              |
| AGGS1572  | ATAACCCAAACACAACCACTCC        | GTGATCGGAGTTTCGGATTA          | Huang et al.(2016) |              |
| AGGS1577  | TGGGTTAGAGACAGAAGGGAAG        | TCTCTCTACTCACGCACTC           | Huang et al.(2016) |              |
| AGGS1579  | ACTTTAGAGCTGAGGTGGC           | CTCTCCTCGGCTTCTTTATCA         | Huang et al.(2016) |              |
| AGGS1585  | TCTCAGTCCTGCTTCTTGTCTG        | GACCTCCACCCTTTAATTTCT         | Huang et al.(2016) |              |
| AGGS1589  | TCAACACCAGCTCTTCTCTCAA        | GCAAACCAGAAGGGAAGAATAG        | Huang et al.(2016) |              |
| AGGS1592  | GGGAGAGCAGAGATTGAAGAAG        | TAGTTGCAAGCTGTCATTAGGC        | Huang et al.(2016) |              |
| AGGS1596  | TGTGGTGGATCTCTGAGCTAAA        | CTTCACACAGGTTCTGCTTCTG        | Huang et al.(2016) |              |
| AGGS1600  | CGCAATTCAACTGATTCCTTC         | CCCTCCATTTCTGCTTCTACTA        | Huang et al.(2016) |              |
| AGGS1601  | AAGAAGACCACGAAGATGTTGC        | CTGCTTCTTCTCGTCGTC            | Huang et al.(2016) |              |
| AGGS1606  | CTCACACATACACAACCTGCTG        | CATCGAGTAGTATGGATGCTGA        | Huang et al.(2016) |              |
| AGGS1612  | CCTCCATCGAAGTTCGTTTAC         | TCTACAATGTTATGCCGATCCA        | Huang et al.(2016) |              |
| AGGS1613  | ATGAAGAAAGACGACAGCATGA        | CATGGATACCTGCGAGTAAAGA        | Huang et al.(2016) |              |
| AGGS1615  | TGGCTTGTTGATAATGATGCTG        | AATGACCATCCGTCATTCAACT        | Huang et al.(2016) |              |
| AGGS1620  | AAATTATTCTGCGGTCCTCGTA        | ATGCTTCTGCTTCTGCTTCTCT        | Huang et al.(2016) |              |
| AGGS1621  | ATACTCTTCCGAAGCTGCAAG         | CTTCCAGCTCACCGTAACTACC        | Huang et al.(2016) |              |
| AGGS1629  | CCCTAGGCTCTGATACCATGTAA       | TCAGTGTTCACTCAATCACAGAGA      | Huang et al.(2016) |              |
| AGGS1632  | GAAGTTGCTCGCGTGTATATTG        | TCAGGTTTCAAGTCTCGATGAA        | Huang et al.(2016) |              |
| AGGS1635  | GAAGATGTCATGCGCAATAAGT        | GTCACGTGGTCTTCATGTGATT        | Huang et al.(2016) |              |
| AGGS1638  | GATGGATGAGTGGTCATACACG        | CCTCCTGATTGGATGCTCTATC        | Huang et al.(2016) |              |
| AGGS1639  | GAATCCCTTTCTCTATCCACCA        | CAATCTTTGGAGGAGATTGGAG        | Huang et al.(2016) |              |
| AGGS1643  | CTTTGCTCATTGTTTCTTACG         | ACTCAGATGCCCTTCTTCTATC        | Huang et al.(2016) |              |
| AGGS1645  | CCCTCTCCCTTATTCTGCAA          | AACGACAATGCGATAAGGATCT        | Huang et al.(2016) |              |

| <b>ID</b> | <b>FORWARD PRIMER (5'-3')</b> | <b>REVERSE PRIMER (5'-3')</b> | <b>Source</b>      | <b>Alias</b> |
|-----------|-------------------------------|-------------------------------|--------------------|--------------|
| AGGS1654  | ACAACATCCAGCAACGGTAATA        | TGATGCGTTTTACCGATTTA          | Huang et al.(2016) |              |
| AGGS1656  | ATTGAAAGGGATGGAAGAAGGT        | CTCCTCTGCTGCGTTAAGAAGT        | Huang et al.(2016) |              |
| AGGS1662  | GTAACAAGCACGCATTCAATCA        | CACCACCTGCAATCACTTCTAA        | Huang et al.(2016) |              |
| AGGS1671  | GGAATTAGGAAAGCAGATTGGA        | AGCCATCCAAGCATAGAAGAAA        | Huang et al.(2016) |              |
| AGGS1678  | CTCCCATCTCTTTCGTCTTTC         | GAGAGGAGGGAAAGGAGTGA          | Huang et al.(2016) |              |
| AGGS1691  | TGCTGCCCTCTCTCTCTCTT          | GGAGCACCATAAGAGAGAACTCA       | Huang et al.(2016) |              |
| AGGS1700  | CCAACCATTCCCTTCTTCTCTT        | TGGGAAATAATCCACAACACAG        | Huang et al.(2016) |              |
| AGGS1728  | CGGAGAGTATGTGCTAATCACG        | ATTACAGCACATGGTGCCTCTT        | Huang et al.(2016) |              |
| AGGS1750  | TCGCAGATCTGATTAGAACCAA        | AGATGAAGGTGTGCAAGATGG         | Huang et al.(2016) |              |
| AGGS1754  | GGATCTTTGATCGGATTCCTAA        | AAGAAAGAAGAGTGGTGCCAAA        | Huang et al.(2016) |              |
| AGGS1773  | TGCAAGGTAAGGCTTAGGGTAA        | CTGGTAGAGAACAGGGACACCT        | Huang et al.(2016) |              |
| AGGS1783  | CACAAATCTCATAACGGTCCAA        | TCTTCATTGGAGTAGCCACCTT        | Huang et al.(2016) |              |
| AGGS1795  | GTCATCGCCGAACCTTCTTAG         | CCTTAATGGCAATGCTATCTCC        | Huang et al.(2016) |              |
| AGGS1840  | TGAGTGAGGCTAACTGTGGTTT        | CGAGTCTTTGACCAGATGACAG        | Huang et al.(2016) |              |
| AGGS1885  | GGAAGTGAGGTTGGTGATCTTC        | AAGGATATGGAAAGTGGTGGTG        | Huang et al.(2016) |              |
| AGGS1925  | TAGTTCTCTCCCTCACCCCTCTG       | CTCGTAGCTAAATGCCCAAGTC        | Huang et al.(2016) |              |
| AGGS1932  | AATTCGATAGCAAACCTTGACC        | CATCAGTAGCAGCGACGATAGA        | Huang et al.(2016) |              |
| AGGS1953  | TTTCACCTGAGAAACCAACCTT        | TCAATTCACTCTGCTTTCTAGGG       | Huang et al.(2016) |              |
| AGGS1954  | TCACCCGTATAACGGTTTAGTG        | CGGTAGCTTTAACGGATGAGAT        | Huang et al.(2016) |              |
| AGGS1979  | CATGGCACACTCTTCTACGTAAC       | GAAGGTGGTGGCAGACATTATT        | Huang et al.(2016) |              |
| AGGS1987  | TAGTGTACGGAACCACAAACGA        | AGCAACTGGAGTTCGTTACCAT        | Huang et al.(2016) |              |
| AGGS2019  | CTCCCTTCAAGTTCAAGAGCAC        | GCAGCATCTGAACAAGAACAAA        | Huang et al.(2016) |              |
| AGGS2023  | AAACGTAGAGCTCGACAAGAGC        | CCCAAGACCCAACATAGAAATG        | Huang et al.(2016) |              |
| AGGS2027  | CCTAAATTCGAACTGCAAACCT        | AACAGTGGTAGAAGCGACGAA         | Huang et al.(2016) |              |
| AGGS2030  | TCCTCGAAGAAGTGAAGTAGCC        | GACTGGTGAGTAGTGACGGACA        | Huang et al.(2016) |              |
| AGGS2061  | ACCAGGCAAGAATTATGGAAGA        | CACCTTTCACCACCATTAATCC        | Huang et al.(2016) |              |
| AGGS2082  | CCAACAGTGGTAGTTTGGTGAA        | TTGAACTGTGAACCCTCTTTCC        | Huang et al.(2016) |              |
| AGGS2092  | CTCCCTCCCTCTCTCTCTAACC        | GTGTTTCTAGCAGCAACGACAG        | Huang et al.(2016) |              |
| AGGS2115  | GCAAAGACGTTGAAATGATGAG        | GAGAGGCAGATAGCAGAGCTTC        | Huang et al.(2016) |              |
| AGGS2117  | ATGATGACAATCGGACAATGTG        | AATTAGAGATAGTGGTGCGTGGA       | Huang et al.(2016) |              |
| AGGS2121  | GACTCTCTCACCCCTTCTTTC         | AAATCGACGTGGAATCGAAA          | Huang et al.(2016) |              |
| AGGS2124  | TGAGTCAGTAAATACGCCGAAA        | GGACACTTTGTAGTTCACCGTTT       | Huang et al.(2016) |              |
| AGGS2134  | AGCACCACTTGAGGGACATTAT        | TTTGCAGAGAACTCACAAAGG         | Huang et al.(2016) |              |
| AGGS2135  | ACTGGAGGTCCTGCTGTTAGTC        | ATACCAGTTCTCCAGCAAGCTC        | Huang et al.(2016) |              |

| <b>ID</b> | <b>FORWARD PRIMER (5'-3')</b> | <b>REVERSE PRIMER (5'-3')</b> | <b>Source</b>      | <b>Alias</b> |
|-----------|-------------------------------|-------------------------------|--------------------|--------------|
| AGGS2147  | CCTGAGACCAGAGTTGCTTCTT        | TTCTTGGAGCTCAACATAGTGG        | Huang et al.(2016) |              |
| AGGS2177  | CTCTCAGTTTCTTTGTGCGCTCA       | GTTCTTGGGATGTGAGCAATTT        | Huang et al.(2016) |              |
| AGGS2186  | CCACGACAGGGACTTCCTATAA        | TGATGGAGTTGAATGAATGAGC        | Huang et al.(2016) |              |
| AGGS2187  | GGTCTGTGAACAGAAGGGAGAC        | ACTGTGGGTACAGCAAACAGTG        | Huang et al.(2016) |              |
| AGGS2195  | TGTTTCATCTGCTCTTATGTGG        | ATGCTCTTCCGGTAGTGTGTT         | Huang et al.(2016) |              |
| AGGS2202  | TATGCGCTCAAATCTCTCAAGT        | ATGGGAGAATAGGTGAAGAAGC        | Huang et al.(2016) |              |
| AGGS2216  | TGTGTGGGTTTAGGGTTTCTCT        | AAATAGTGGTGCATCAGCCTAA        | Huang et al.(2016) |              |
| AGGS2219  | ATCACAGCAAGGTTACCTCAT         | TGATGTAGAGGGAGAGGGCTTA        | Huang et al.(2016) |              |
| AGGS2224  | TCTCTCTCTCTCTCCCTCTCC         | CCTGCTTGGTTTGGGAGTAA          | Huang et al.(2016) |              |
| AGGS2228  | TATAGGAGGCTATGGTGGTGGA        | AGTCAGGTTTCACCGTTGATG         | Huang et al.(2016) |              |
| AGGS2233  | AGACATTGCAACGACGAGTCTA        | AGCAGAGCTTCTTCTTCTTCCA        | Huang et al.(2016) |              |
| AGGS2251  | ACGCACCACGTTACCATTAGAT        | GATGGCACGAAGCTAGAGAGAG        | Huang et al.(2016) |              |
| AGGS2261  | CTCCCATCTTCCTTCACAGTTC        | ACGGCGACTAAGTGATGAGTTT        | Huang et al.(2016) |              |
| AGGS2262  | TCTCTCTCTCTCTCCCTCTCC         | CTGCCTGGTTTGGGAGTAAA          | Huang et al.(2016) |              |
| AGGS2272  | CCTTCTTTCACCGACTAACCAC        | GTGAGTGTTCTTAACGGTGTCG        | Huang et al.(2016) |              |
| AGGS2287  | TTTCTTTCTTCTCTGGTGTGAGC       | AGGCACAATGCACTCAAGTATG        | Huang et al.(2016) |              |
| AGGS2317  | CTCCTACTCCCTCCATCTCCTT        | AGGAGACACTACTGCTGCACAC        | Huang et al.(2016) |              |
| AGGS2325  | GAGAGGCATATTCCATTAACGA        | ATAGAGTGGTGGCTATGGCATC        | Huang et al.(2016) |              |
| AGGS2332  | TGTCTCAGATCTGCCATAGCTT        | TCTACAACAATCCAAACCACCA        | Huang et al.(2016) |              |
| AGGS2359  | GAGAGGACAGTGTGGAGAGAT         | TACCTGGTAAATCCGACGGTAA        | Huang et al.(2016) |              |
| AGGS2368  | GTTTACCTCACCTTCACCGAAC        | AGCAGAAGTGAGCAACAGGAAG        | Huang et al.(2016) |              |
| AGGS2371  | CCTCTCCCTCCTCTCTTTCTCT        | GTTATCTCTTGGTGCCTGCTTG        | Huang et al.(2016) |              |
| AGGS2372  | TACCGTTGGATTAATGGAAACC        | GAGAGAGGCAGAGAATGGAAGA        | Huang et al.(2016) |              |
| AGGS2380  | AGAAACCCTCTCTTCAATCACG        | GATGCCAGAGTGAGACAGATGA        | Huang et al.(2016) |              |
| AGGS2384  | TTTCTGCCAATGCAACAAAAG         | AACTAAAGATGTGGCTTGAGTGG       | Huang et al.(2016) |              |
| AGGS2387  | GAGAGAGAGAGCAACGTTGAGG        | CATTCCTCTCTTACGATCACA         | Huang et al.(2016) |              |
| AGGS2393  | TGCGTCTATCACAACAGCAAC         | TTGATGTCTGTGCATGTGTTTC        | Huang et al.(2016) |              |
| AGGS2398  | GAGGTGAGTGGGCACATAGAAT        | CTTGGCACATTCAACAAATACG        | Huang et al.(2016) |              |
| AGGS2407  | CCTCTCCCTCCTCTCTTTCTCT        | CTGCCTGGTTTGGGAGTAAA          | Huang et al.(2016) |              |
| AGGS2413  | GGACCAATATTGAGCCAAACG         | GATTTGCATGTTCTTCCCTCTCC       | Huang et al.(2016) |              |
| AGGS2425  | TTTCCTTCGCCTTTGTCATT          | AAGCTCACAAGTGCTCTTCGAT        | Huang et al.(2016) |              |
| AGGS2438  | AGCGTAGGAACCCAAATTGAAA        | TCTCAGTTAGCCGAGTGATGAA        | Huang et al.(2016) |              |
| AGGS2475  | TGCTACTTTCATCGCATCACTT        | CTACCGATCTCCCTTACCGATT        | Huang et al.(2016) |              |
| AGGS2488  | CCTGGATTTCTCTCTCTCCATC        | CATAACGAACAAACCACAAAGG        | Huang et al.(2016) |              |

| <b>ID</b>     | <b>FORWARD PRIMER (5'-3')</b> | <b>REVERSE PRIMER (5'-3')</b> | <b>Source</b>             | <b>Alias</b> |
|---------------|-------------------------------|-------------------------------|---------------------------|--------------|
| AGGS2492      | AACGGTTCGTCAATCATAGCTT        | AAAGAGCCATTCAGCTCATTTC        | Huang et al.(2016)        |              |
| AGGS2494      | ATCTCCCTACTCCCTCTGCTG         | GAGGAGGTTTGGAAATGGAGTT        | Huang et al.(2016)        |              |
| AGGS2508      | TCAGGATCACCTTCAACAAGAA        | TCGAACCCTTTCTCTCTCTCTC        | Huang et al.(2016)        |              |
| AGGS2509      | CCTGTATAAGGGAACAGGTGGA        | AGCATCACCATCATCCTCTCTC        | Huang et al.(2016)        |              |
| AGGS2532      | GAAAGGCAAGGGTTGTGTTAAG        | GGGCGTGAATCACTCTCATAAT        | Huang et al.(2016)        |              |
| AGGS2535      | CCCTTTCTTTCTTTCTCTCTCTC       | GTTATCTCTTGGTGCCTGCTTG        | Huang et al.(2016)        |              |
| AGGS2555      | CGTCTCGCTGTCGTCTCTAAAC        | CTCTAACGGTTGACTTCGACAA        | Huang et al.(2016)        |              |
| AGGS2556      | TTCCAGTTGAGTTCACCATGT         | CCACCACACACTCTCTTCACTC        | Huang et al.(2016)        |              |
| AGGS2564      | CCCTTTCTTTCTTTCTCTCTCTC       | CTGCCTGGTTTGGGAGTAAA          | Huang et al.(2016)        |              |
| AGGS2567      | GCCTTCCTCCATTCTTGAGTTA        | CCGACTCCTCTCTTCTTCTTCA        | Huang et al.(2016)        |              |
| AGGS2572      | GAAGAAAGAAGCGAACCAGAGA        | AAACACTTTGGGAGGTGTGG          | Huang et al.(2016)        |              |
| AGGS2576      | AGACTCATCACTTGATCGTTGC        | GAGTCATTCAATTGTGTGTTTGC       | Huang et al.(2016)        |              |
| AGGS2580      | CGTTCTGTTTCATCCCATCAATA       | TTCACCGCTACTGAAGAAGAGA        | Huang et al.(2016)        |              |
| AGGS2701      | GGGTGGGTTACCAACATTCTAA        | CGAAATAGCGGTAATCCACATT        | Huang et al.(unpublished) |              |
| AGGS2710      | CCAAGGAACCAAGCTGATTT          | TGAATAGGGTAACATGGTCACG        | Huang et al.(unpublished) |              |
| AGGS2728      | GACGGAAACTCTGACAAAGTCC        | GTCGGCTTCTTATCACACTCCT        | Huang et al.(unpublished) |              |
| AGGS2744      | AGGATCAATGCAATTGAAGAGG        | GTTAGAACTATTTGCGGCAGTT        | Huang et al.(unpublished) |              |
| AGGS2745      | AGGATCAATGCAATTGAAGAGG        | GTTAGAACTATTTGCGGCAGTT        | Huang et al.(unpublished) |              |
| AGGS2746      | TCCTAGGACCAAGTAAGTTGTGG       | AACGGGCATAATCTTCATCATC        | Huang et al.(unpublished) |              |
| AGGS700       | ACACACCGTAAGTGTCTTCCT         | TTAGGAACTCCAACGAATCCTC        | Huang et al.(2016)        |              |
| AGGS734       | AGGAAGACGTTGAAGAAGATGC        | TCTCAACCAAAGAGATCATGGA        | Huang et al.(2016)        |              |
| AGGS750       | CGCCATCTCTTCATGTAAGTT         | TACAAGAAGCTACGACGACGAC        | Huang et al.(2016)        |              |
| Ah26          | GAAAATGATGCCATAAAGCGTA        | AGTGTAACACCCCGTTAGCC          | Jimenes et al. (2007)     |              |
| Ah3           | TCGGAGAACCAAGCACACATC         | TTGCGCTCTTTCTCACACTC          | Bravo et al. (2006)       |              |
| Ah325         | TGAGGTTGCTCTTCTCCTTCCTC       | GAGCACCAGTGACAACACAAGG        | Moretzsohn et al. (2005)  |              |
| Ah426         | TGGAATCTATTGCTCATCGGCTCTG     | CTCACCCATCATCATCGTCACATT      | Hopkins et al. (1999)     |              |
| AHBGS11008H04 | TGCTCTCTGTGGGTTTCA            | GTCGCCATTTGTGGAAAA            | Moretzsohn et al. (2009)  |              |
| AHGS0108      | GGTGAGGGAAAGAATCCACA          | ACAAGGGTGACTTTGTTGGC          | Shirasawa et al. (2012)   |              |
| AHGS0122      | TGAGGATCTTGATCTTGGC           | CGAATCCAGTGCCCACTAAC          | Shirasawa et al. (2012)   |              |
| AHGS0147      | TAACAGCCGATCAAACCTCC          | ACCACCACCTGCAATCACTT          | Shirasawa et al. (2012)   |              |
| AHGS0153      | CTCCATCGTGTGTTGCTCCT          | GCACTTGCAACGCTGTTCTA          | Shirasawa et al. (2012)   |              |
| AHGS0201      | CACAATACACACACGCACCA          | TTACAACGGCATGCTTAAACG         | Shirasawa et al. (2012)   |              |
| AHGS0274      | TTGCTGAGAACATCACTGCC          | ATAGCGACGGCGACTAAGTG          | Shirasawa et al. (2012)   |              |
| AHGS0288      | CAGTTCTGAGCAAGCACTCG          | ATTAGAACCCCTCACCCAC           | Shirasawa et al. (2012)   |              |

| <b>ID</b> | <b>FORWARD PRIMER (5'-3')</b> | <b>REVERSE PRIMER (5'-3')</b> | <b>Source</b>           | <b>Alias</b> |
|-----------|-------------------------------|-------------------------------|-------------------------|--------------|
| AHGS0300  | AAGAAGCATGGAAATGGTGG          | CAATCAAATTGGGGAAATGG          | Shirasawa et al. (2012) |              |
| AHGS0344  | TCACTGAGATGCAGAATGCAC         | CGTTGAGGGTTGTTCCACTT          | Shirasawa et al. (2012) |              |
| AHGS0346  | TTATGCCTACCACCCCACTC          | TTGGGAGAAAATGATGGAGC          | Shirasawa et al. (2012) |              |
| AHGS0390  | CATCATCCAATCACAATCCA          | GTGGGGGAAGATCTACGACA          | Shirasawa et al. (2012) |              |
| AHGS0400  | GGGCAGAGATTCATGGAGAG          | CTTTCGAAGGTCTGCTCGTC          | Shirasawa et al. (2012) |              |
| AHGS0422  | TCCTAATTGGCCCTTCTCCT          | AAAGCCTAAGAAGAATCGAATCAA      | Shirasawa et al. (2012) |              |
| AHGS0429  | AGCACACGTGCATAGGTGAG          | TGGGTAGCTATGCATGATTTT         | Shirasawa et al. (2012) |              |
| AHGS0729  | TGGTTGTTCTAACCCCTTCGG         | TCACTATCCCATCCCTGCTC          | Shirasawa et al. (2012) |              |
| AHGS1098  | CTGTTGACGCTGTGAAATGG          | TTACCCCTTTCCTTTTCTGA          | Shirasawa et al. (2012) |              |
| AHGS1126  | GGACCGACATTTTCTCGTA           | TCCAACGAAAAAGAACCAC           | Shirasawa et al. (2012) |              |
| AHGS1130  | AGGATCTCTGCTCAAATGCC          | TGACAGCAACATGATACGCA          | Shirasawa et al. (2012) |              |
| AHGS1143  | AATGCAGAACGGAAGAATGG          | CGTCGAATTTTCCAATGCT           | Shirasawa et al. (2012) |              |
| AHGS1176  | GCTGATCCAAGCCCAAATTA          | AGCTTGCTTTGATTAGGGTGA         | Shirasawa et al. (2012) |              |
| AHGS1188  | TAAGAGAATGAGAAGCGGGG          | TTTGCCTTCACTGGAAGCTC          | Shirasawa et al. (2012) |              |
| AHGS1189  | TCTCACCATAACAGTCCCCC          | CTGCCAGCTAGGACAGATCA          | Shirasawa et al. (2012) |              |
| AHGS1203  | CTCATGCAACGACGTAGGAA          | CACTACCATTGTGGATAACATTATT     | Shirasawa et al. (2012) |              |
| AHGS1208  | TGTTGATGAACGAAATGGGA          | TCCAGAGCAACTGGACAATG          | Shirasawa et al. (2012) |              |
| AHGS1228  | CACTTTTAAGGCGTGCCAAAT         | TGTCAGGGGAAGCTTATGTCA         | Shirasawa et al. (2012) |              |
| AHGS1232  | ATCCTAACTCCCCTAGCCCA          | GATTCTGCTTTCCCCTTTCC          | Shirasawa et al. (2012) |              |
| AHGS1241  | GCTAAGCTAAATTACCCATTTTGTG     | GTTTGAGCTTGTGCAGTGGA          | Shirasawa et al. (2012) |              |
| AHGS1245  | CGTGATTAGCGTAACTGCCA          | TCTTAGCTGCGAAATCCACC          | Shirasawa et al. (2012) |              |
| AHGS1246  | AAATGCCATTACACTGCAA           | TCACTTCTTCCCACCACC            | Shirasawa et al. (2012) |              |
| AHGS1251  | GGATTCCGGTAAACGACACT          | GATGCCCTTTCTTCATCCAA          | Shirasawa et al. (2012) |              |
| AHGS1261  | GCAGAGGTAGCAGGGATGAG          | CCCCTCTCAACGTCTCTCAA          | Shirasawa et al. (2012) |              |
| AHGS1266  | TCGGATATTACGACTCTGA           | TGAGAACCCTTTTGAGGACG          | Shirasawa et al. (2012) |              |
| AHGS1267  | TGCAATATAGTCGGCTGCAC          | TCTGGTGTGCTTCAAAAGGA          | Shirasawa et al. (2012) |              |
| AHGS1273  | ACTGGAAATACCCCTGACCC          | TGCCGATCCATTTCTTCTC           | Shirasawa et al. (2012) |              |
| AHGS1275  | GAGTGAGCTCGGAGGAACAC          | ATCACGAACTGCTCCTGCTT          | Shirasawa et al. (2012) |              |
| AHGS1278  | GGAGCAGAATTCAGTTCATTTACA      | ACTGGAGCCTATTCTTCGCA          | Shirasawa et al. (2012) |              |
| AHGS1283  | TGAACACACACGCACTAGCA          | TGACAACCTTCTGAAGCGATGA        | Shirasawa et al. (2012) |              |
| AHGS1288  | GTGAGGTTCTGACGGCTCTC          | CCATAACATTCACCCCATCC          | Shirasawa et al. (2012) |              |
| AHGS1294  | CATCCATTCAATCACATGGC          | TCCTAACATGGAGTTCATAAACCA      | Shirasawa et al. (2012) |              |
| AHGS1296  | GAGGTATGGCGTCTTTGAT           | GTGTTGCAAACACCTCCCTT          | Shirasawa et al. (2012) |              |
| AHGS1311  | CACTTGAAGCACCAAATTGAGA        | TGGGTGCCATTGTTTCATTA          | Shirasawa et al. (2012) |              |

| <b>ID</b> | <b>FORWARD PRIMER (5'-3')</b> | <b>REVERSE PRIMER (5'-3')</b> | <b>Source</b>           | <b>Alias</b> |
|-----------|-------------------------------|-------------------------------|-------------------------|--------------|
| AHGS1319  | CAAACCATGTGTCAGCATCTCG        | GGTCTCGAACCTCCAATGAA          | Shirasawa et al. (2012) |              |
| AHGS1333  | ATGACTTACCCCATTTCCC           | CGAAGAGGATGACGAGATCA          | Shirasawa et al. (2012) |              |
| AHGS1338  | ACTGTCTCAACCCCATCCTC          | TCATCGTCACTACCAGCACC          | Shirasawa et al. (2012) |              |
| AHGS1340  | TACGCTTGCCAACTTCACAC          | AACGGTTGCTGCAAAGAACT          | Shirasawa et al. (2012) |              |
| AHGS1342  | CTGCATAGTGGCGGTGATAA          | CATCGGATTAATTCAACGGT          | Shirasawa et al. (2012) |              |
| AHGS1369  | TCAAACCGTGAACCCTTTTC          | ATGGAGTCCACGCAGTCTTT          | Shirasawa et al. (2012) |              |
| AHGS1393  | TGACTCGCTAACTCAGCAGC          | CGAACTCGAAAGATCACGGT          | Shirasawa et al. (2012) |              |
| AHGS1395  | TCCGGCGACATAGGAAATAG          | TAAACTCAAATCGCGAACCC          | Shirasawa et al. (2012) |              |
| AHGS1419  | TCTCCATGGTGATTGAACGA          | TGCAAGCTGTCATTAGGCTC          | Shirasawa et al. (2012) |              |
| AHGS1426  | ACCACACCGCAAGAAAGAAG          | CGTTGAGATTGTTGTGTCCG          | Shirasawa et al. (2012) |              |
| AHGS1434  | CTGGTTAGATTCTCCGGCAC          | CAGCTCAATCCTACGCATCA          | Shirasawa et al. (2012) |              |
| AHGS1440  | ACGTTGGGGACAACCTTTGAG         | TCCTGGGAGAAGTAGAGCCA          | Shirasawa et al. (2012) |              |
| AHGS1446  | CAGGAGAGAGAGAAAAGAGAGAA       | GGCGGTAAATTCGACGATAA          | Shirasawa et al. (2012) |              |
| AHGS1457  | GAAGGAGGGGGAAAGAGAGA          | CGGAAGAAGAAGCAACTTGG          | Shirasawa et al. (2012) |              |
| AHGS1459  | TTACCGTGAGCCCTAACCTG          | TCGTCTTTCGGTTCCGATTA          | Shirasawa et al. (2012) |              |
| AHGS1462  | TTGCACTGCACGACTCTTTC          | GAAGCACCTTTTATGGCACC          | Shirasawa et al. (2012) |              |
| AHGS1465  | GGTTGGCGATGAAGAGAGAG          | CCTCAATGCCCTCTCCAATA          | Shirasawa et al. (2012) |              |
| AHGS1466  | CAACCAACTACCCTTTTCCG          | AGGCATGAGGACAATGCTAA          | Shirasawa et al. (2012) |              |
| AHGS1470  | GACACCGCTGGACAAGAAAG          | ATCAAAGCAACAACGGGAAC          | Shirasawa et al. (2012) |              |
| AHGS1473  | CCCTAACCTAATTCCCATCA          | ACCGATCTCCCTTACCGATT          | Shirasawa et al. (2012) |              |
| AHGS1475  | TACTCGCCGCTCTCTTTGAT          | ACAAGATCGGTGGCAAAAAC          | Shirasawa et al. (2012) |              |
| AHGS1489  | CGATAATTGCCTAGGAAGTAGAGA      | AACTTCCCCGAACTTCTCGT          | Shirasawa et al. (2012) |              |
| AHGS1497  | TCTTCCTAAGAAGGCAAGAGC         | TGGGGAAGAATAAACCATGAA         | Shirasawa et al. (2012) |              |
| AHGS1507  | TATTTGTTTCTGGTTCGGCC          | TCTGTTAGAGAAGTCAAGTCTGTTG     | Shirasawa et al. (2012) |              |
| AHGS1522  | ACCAAGGTGCGACATTTTTTC         | TTGATTTTGCAGGGTTAGGG          | Shirasawa et al. (2012) |              |
| AHGS1524  | GTGACGGAAGAGAGTAGCGG          | GCAGTGATTGTCTCTGGCAA          | Shirasawa et al. (2012) |              |
| AHGS1530  | CAAGTGAGAGAAAGGGAAAGAGA       | AGGTAATACACCAGTGCGCC          | Shirasawa et al. (2012) |              |
| AHGS1532  | CTGGTGTGAGCTCGAAGATG          | AAACCAAGCCCAATGTCAAC          | Shirasawa et al. (2012) |              |
| AHGS1543  | ACGTCAGGTTCAACAGACA           | ATTTTTCTCCGAGTCAGCCA          | Shirasawa et al. (2012) |              |
| AHGS1552  | CGGTGACTCATTCCACACAC          | TGCTTCTTTCTCGTCGTCAA          | Shirasawa et al. (2012) |              |
| AHGS1561  | GGCTCCCATTCATTCTCAA           | TCGTTTAACCTCCCTTGTGG          | Shirasawa et al. (2012) |              |
| AHGS1564  | CTCTCTGCCATTGCATGTGT          | AACTGCTTTTAAAATCTCCCC         | Shirasawa et al. (2012) |              |
| AHGS1574  | TTGCTGGGCAGAAGAGAGAT          | CTCCACCACCGTCTTCTTTC          | Shirasawa et al. (2012) |              |
| AHGS1579  | GCTGAGCTGAGCCAGAAACT          | TTTCTGGAATCGCATCTCCT          | Shirasawa et al. (2012) |              |

| <b>ID</b> | <b>FORWARD PRIMER (5'-3')</b> | <b>REVERSE PRIMER (5'-3')</b> | <b>Source</b>           | <b>Alias</b> |
|-----------|-------------------------------|-------------------------------|-------------------------|--------------|
| AHGS1595  | CCTTCACCCTTTGTTTCAGC          | ATGCACCAACAAATCCAACA          | Shirasawa et al. (2012) |              |
| AHGS1602  | ATCACTCACGTCCGGGTAAG          | TAGCTTCGCAGGTCGAGTTT          | Shirasawa et al. (2012) |              |
| AHGS1617  | CACCCTCAACTCCTTCTCCA          | GAGCTTCTTCATCTCCGCAC          | Shirasawa et al. (2012) |              |
| AHGS1624  | AGCTTGCTTTGATTAGGGTGA         | GCTGAAGACTTCCAAAGCCA          | Shirasawa et al. (2012) |              |
| AHGS1626  | GAAGGTCAAACCTTACGGGCA         | CAGAGGGGTTGCCAAAGATA          | Shirasawa et al. (2012) |              |
| AHGS1630  | GATTAGAATTGCGCACCCCTC         | TTGGTGGTGTGACACTGGT           | Shirasawa et al. (2012) |              |
| AHGS1650  | TGCTAGCTGTTTTGCACTCA          | CATTCGAGAGGCTACTACTCTCC       | Shirasawa et al. (2012) |              |
| AHGS1666  | ATGCTGCAGGATTGATGACA          | TTGACAAAAATGACCATCCG          | Shirasawa et al. (2012) |              |
| AHGS1668  | TCCCTCCATCTCCTTTGATG          | TTCTACTCGGATTTGGGGTG          | Shirasawa et al. (2012) |              |
| AHGS1669  | CTCCTTCTCTCCCATCACA           | CATTCATTGTGTGTTTGCCC          | Shirasawa et al. (2012) |              |
| AHGS1670  | GTCGATTGTCGGTTTGGTTC          | GTCTCTGGAAGAGCCGTGAA          | Shirasawa et al. (2012) |              |
| AHGS1672  | CGCCCTTCTTTTCTAAAT            | GGCAGAGAAGAGGAAGCAGA          | Shirasawa et al. (2012) |              |
| AHGS1674  | GACACAATGGATTCAACCCC          | CCCTTCCCTCTCTGCTTTC           | Shirasawa et al. (2012) |              |
| AHGS1682  | CCCCTCTCCCTTATTTCTGC          | ATCTCAATGGAGGCAACGAC          | Shirasawa et al. (2012) |              |
| AHGS1683  | AGTTGGCAACAACCTTGGGAG         | GCACGGATTCAGTGTTC             | Shirasawa et al. (2012) |              |
| AHGS1687  | TTCAGTTTCCTTCCACCACC          | TATCACAGGAACCTGGGAGGC         | Shirasawa et al. (2012) |              |
| AHGS1692  | CCAAAACAAAGCAAAGGGAA          | ATCCCAACGAGACCACTCAG          | Shirasawa et al. (2012) |              |
| AHGS1696  | TCCTTGTCCTTTGCATACCC          | ATATTTCTGCTTCGGCGCTA          | Shirasawa et al. (2012) |              |
| AHGS1699  | TGGAAAACCGCTTCTCTTTC          | CAACACCCTCACTCCTCCAT          | Shirasawa et al. (2012) |              |
| AHGS1703  | TCTACCGTCGACACTGCTTG          | TCAACATAACAAAACCAGTTCAA       | Shirasawa et al. (2012) |              |
| AHGS1710  | CAGCAGCATGGCAACAGTAG          | CGGAAGTCATTGCTAGAGCC          | Shirasawa et al. (2012) |              |
| AHGS1750  | ATTGAAGAACTCACGGCGAC          | CTGTTCTCACCGTAAAGCCC          | Shirasawa et al. (2012) |              |
| AHGS1755  | GAGGAAGAACTGGGCATGAA          | CATCAGCCTAAGCCCACATA          | Shirasawa et al. (2012) |              |
| AHGS1770  | TGGAGGTTTCGTGTTTTCTT          | AAGCTGAGATTGGGATAAGAAAG       | Shirasawa et al. (2012) |              |
| AHGS1773  | TGGAGGGGTTGTTAGAGGTG          | TTTTCCGATGGTAAATTCGC          | Shirasawa et al. (2012) |              |
| AHGS1805  | ACCAATATTGAGCCAAACGG          | AGCCAAGGATTTGCATGTTT          | Shirasawa et al. (2012) |              |
| AHGS1806  | GCAAAATTTTCTTCCCATTGA         | TCTATCCTGACCACGAAGCC          | Shirasawa et al. (2012) |              |
| AHGS1813  | TCACAACCACACACTTCGT           | TATCCCTATGACGGCACACA          | Shirasawa et al. (2012) |              |
| AHGS1818  | TCGTGCGACAGAGAAGTCAC          | CCAACAGAAAATTCATTCGC          | Shirasawa et al. (2012) |              |
| AHGS1829  | CCTTCCCACATATCCCTCA           | GATCTCGTTCTTCTCGGCAC          | Shirasawa et al. (2012) |              |
| AHGS1845  | CTCCAACCTCGCCTTCAACTC         | GACTCCCAAATGTTGACCG           | Shirasawa et al. (2012) |              |
| AHGS1846  | CCCACCTAGCAGAAACCAA           | TCAGTCCCATTCAAGGTTCC          | Shirasawa et al. (2012) |              |
| AHGS1850  | TTGCATACAAACCTTGACAGC         | TTGACGTTAATCACATGCC           | Shirasawa et al. (2012) |              |
| AHGS1853  | TTTTAGATCCATTTGGTTTCTCTT      | GGACCAAAAATCTCTGAGCG          | Shirasawa et al. (2012) |              |



| <b>ID</b> | <b>FORWARD PRIMER (5'-3')</b> | <b>REVERSE PRIMER (5'-3')</b> | <b>Source</b>           | <b>Alias</b> |
|-----------|-------------------------------|-------------------------------|-------------------------|--------------|
| AHGS1855  | GATGCAGCTGCTAAAAGCCT          | TTTATTGAGTGGGGTCCTGC          | Shirasawa et al. (2012) |              |
| AHGS1903  | CCAGGTTACACATTCATCC           | TCTGTGAGCTTGCCTCAATG          | Shirasawa et al. (2012) |              |
| AHGS1910  | CCCCTTCCCTAAAACGTCAT          | TGGCACAACAAGGAGAGATG          | Shirasawa et al. (2012) |              |
| AHGS1913  | CCATCATCCGCTTTTTTCACT         | GCAACGAAAGGCTATGAATGA         | Shirasawa et al. (2012) |              |
| AHGS1928  | TAAACGTGTTGGCACGAAAA          | ACTCCGCATGCTGTGATTAG          | Shirasawa et al. (2012) |              |
| AHGS1930  | AACATCTGCCAAATGCAACA          | CTGCCATGTGTGCTTGAACCT         | Shirasawa et al. (2012) |              |
| AHGS1937  | GGATAGAGCAAAGCAGTGGC          | CCGATTTTCAGAGTCCCCATA         | Shirasawa et al. (2012) |              |
| AHGS1940  | AACTCCGCGCCTATGTTCTA          | GGGAGAGGATGATGGTGGTA          | Shirasawa et al. (2012) |              |
| AHGS1954  | AATTTTTATGGGGGCTACGG          | ACATGCCTTCCCCACCTAAT          | Shirasawa et al. (2012) |              |
| AHGS1974  | CCTTTGTAAACTCGACACCG          | AGAGACTAGGACTGGGATGGG         | Shirasawa et al. (2012) |              |
| AHGS1980  | TTTCCATCGGATTTTTTCGTC         | GAGGTGGCAACGGTGATAGT          | Shirasawa et al. (2012) |              |
| AHGS1987  | CATCGATGAGGGGTGTTGTA          | AATGCAAAATGGTGCTTGTTT         | Shirasawa et al. (2012) |              |
| AHGS2005  | AATTTGATTGGGTCTTCCCC          | TGAAAAACTGGCTCGCTCTT          | Shirasawa et al. (2012) |              |
| AHGS2027  | CGAGGAAAAGAAAGGGTAGG          | TTTTCTTCTCCGGGGTTTT           | Shirasawa et al. (2012) |              |
| AHGS2073  | GAGTTCAAACCCCAATCGAG          | TGTTGAAAATATTGGGTATTGGG       | Shirasawa et al. (2012) |              |
| AHGS2084  | GGAGGGAAGGGAGAGAGAAA          | CTCCCCTCCCATCTCTTTGT          | Shirasawa et al. (2012) |              |
| AHGS2130  | GCAGAGAGTTGGGAAGAGGA          | CCGATTCAAGCCCGTTAGTA          | Shirasawa et al. (2012) |              |
| AHGS2141  | AAACAGCGACAGTGACATGC          | AATTTCAATCGCGAAACCAC          | Shirasawa et al. (2012) |              |
| AHGS2153  | AAAAGGCACCTGGAAAAGGT          | CGCCATTTCTTGAGTTTGGT          | Shirasawa et al. (2012) |              |
| AHGS2159  | ACTACGCATTGGGAGTGGTG          | AACAGCCGCCACTACTCTGT          | Shirasawa et al. (2012) |              |
| AHGS2188  | AGCACACGAACACACACACA          | CTCTCTCTCTCCCCAGCC            | Shirasawa et al. (2012) |              |
| AHGS2191  | TCTTCTCCATGCTCACATGC          | ACCACAGCATAGATCTGCCC          | Shirasawa et al. (2012) |              |
| AHGS2195  | CAGCAGCAGGAGTAGGCTTC          | CAAAACCCTGCCTTGAAAAA          | Shirasawa et al. (2012) |              |
| AHGS2241  | CACATGAAAATGCAAATGGA          | AGCGTGTGCTGCTTTCTTCT          | Shirasawa et al. (2012) |              |
| AHGS2319  | GTGGTGAGAAGAAGAAGCGG          | CAACGGTAACTGTGCCGTAA          | Shirasawa et al. (2012) |              |
| AHGS2344  | CTATCTCAACCCGCGAAGTC          | GAGAGGCATCTCAATAGGCG          | Shirasawa et al. (2012) |              |
| AHGS2413  | TTCTTCTCTCGCCCTCGTTA          | CCGTATCGTTGTTTTCTTTGAA        | Shirasawa et al. (2012) |              |
| AHGS2429  | GGGATTAAGGAAGGAGCAGG          | TTGCAAAGGCAATTGCTAAC          | Shirasawa et al. (2012) |              |
| AHGS2466  | TTGGATTGGAATGCTGACAA          | GAAAGGGATTGCCTCTCAAG          | Shirasawa et al. (2012) |              |
| AHGS2509  | GTTAATCCCGCCTACGTTCA          | CACATTCCTTAAGATGTGCG          | Shirasawa et al. (2012) |              |
| AHGS2534  | AAGCTTGTTGCTTCCATTCC          | TCTTTCCCGATTGATTTTGC          | Shirasawa et al. (2012) |              |
| AHGS2539  | CGAAACCAAGTATGGTTCCTTC        | TAAGGCAACACAAGAACCCC          | Shirasawa et al. (2012) |              |
| AHGS2543  | CGTCTACCAGGGCATCAATA          | TCGGCTTCATAAGGGAATTG          | Shirasawa et al. (2012) |              |
| AHGS2559  | TTCTCCTCTGTTCCACCAC           | CCATTCCTTCTCCTTCCTC           | Shirasawa et al. (2012) |              |

| <b>ID</b> | <b>FORWARD PRIMER (5'-3')</b> | <b>REVERSE PRIMER (5'-3')</b> | <b>Source</b>           | <b>Alias</b> |
|-----------|-------------------------------|-------------------------------|-------------------------|--------------|
| AHGS2568  | GGGTGTGGAAATCTGCTGTT          | TTGACCCAAGGGCAAATAAG          | Shirasawa et al. (2012) |              |
| AHGS2579  | ATTCTGTGAAAAACGGGGTG          | GTGTAAACCGACACGTGAGC          | Shirasawa et al. (2012) |              |
| AHGS2602  | GGATTCTCCAACAAAGCAA           | GCACATCGAGTTTCTCACCA          | Shirasawa et al. (2012) |              |
| AHGS2644  | GCTAGGGCACGGATATTTGA          | TTTTACCTACATTGGGTAGGGC        | Shirasawa et al. (2012) |              |
| AHGS2754  | AACAACCTGCCTCAACCCAC          | AACGCGAGGTTTTTGTTTTG          | Shirasawa et al. (2012) |              |
| AHGS2787  | AGTCCCAATCATCAACAGC           | ACCCCTCCATTTCTGCTTCT          | Shirasawa et al. (2012) |              |
| AHGS2795  | CAAACGACTCGTCAATCGAA          | CAAAGTTGGGTCAACGGATT          | Shirasawa et al. (2012) |              |
| AHGS3627  | AGCTCGGCACACTTTCACTT          | CAATCGGAATACCGGAGAGA          | Shirasawa et al. (2012) |              |
| AHGS3715  | CACCCAGTCAAATCTTCAACA         | CTTGTCAAACTCTGTGACTTAGCA      | Shirasawa et al. (2012) |              |
| AhM022    | TGCATGCACAAGGATATGAA          | GCTACATCCAAAGCCATCGT          | Naito et al. (2008)     |              |
| AhM062    | CTCAAGCCCATGAAGACTCC          | GATGAAATGAGCAGGTGCAA          | Naito et al. (2008)     |              |
| AhM082    | GGTCACTCTCTCTCGCAAGC          | GAGCAACAGTGAAACGACGA          | Naito et al. (2008)     |              |
| AHS0487   | TAAGCAACCGGAGAAGCCTA          | CACATCCCAATTGGAACCAC          | Koilkonda et al. (2012) |              |
| AhTE0005  | ACAGTACGAACGGTCCCAAG          | TGGTGCATGTTGTTGTTGTG          | Shirasawa et al. (2012) |              |
| AhTE0006  | AATACCCGAAGCACCTGAAA          | CCAACAACCCAAGGATGAAG          | Shirasawa et al. (2012) |              |
| AhTE0021  | AGTCCCAAGTGGACACCAAG          | TTAGACCAATTCATGTAAGGTCAC      | Shirasawa et al. (2012) |              |
| AhTE0107  | CACTCGGAAAACCAAACCTCC         | CAAGAAGCCTACAAAAATGGTG        | Shirasawa et al. (2012) |              |
| AhTE0119  | AAGCTAGCGATGGCGATAAC          | TTTATGCCCGCAAACCTTTTT         | Shirasawa et al. (2012) |              |
| AhTE0129  | GCATGCAATCGAAAGATGAC          | TGGAAGCAATAAGGACTTCG          | Shirasawa et al. (2012) |              |
| AhTE0148  | GAATCCAGAGCTGCCATTGT          | ATTTTTGCCTCTCAGCCTCA          | Shirasawa et al. (2012) |              |
| AhTE0162  | CTTGCGATCAATGAGGTTATCA        | CCACCTTCCAAATTCATATTGC        | Shirasawa et al. (2012) |              |
| AhTE0164  | AACCACCACCATTTTAAAGG          | TCGTCTCCTTAAGGTTTGCTT         | Shirasawa et al. (2012) |              |
| AhTE0189  | CAAGCAAGTTGTGAAGTGGTGT        | CGCTGACGAGAAAAAGTCTCAT        | Shirasawa et al. (2012) |              |
| AhTE0191  | ACATGATGTTTCTGCCTTCCTT        | CAAGTACAGTGGTGGTCTTCCA        | Shirasawa et al. (2012) |              |
| AhTE0211  | TTTACCAAACATTTCCGTATTT        | CTTTTTGGTGGCTACTCCAATG        | Shirasawa et al. (2012) |              |
| AhTE0212  | TGGTAGCCTGAAAATGAGGTTT        | GCATTGTGCCGATCAGTTAATA        | Shirasawa et al. (2012) |              |
| AhTE0233  | CAGCATATTGGCTGATCAACTT        | CTGATGCCATATGTGTGAAGGT        | Shirasawa et al. (2012) |              |
| AhTE0237  | AAAAATAGTGATGAGCTTGATTGA      | AATAAAAACCCCAAAGCCACATA       | Shirasawa et al. (2012) |              |
| AhTE0251  | GCGTCGTCTTCAATTAGGTTACT       | AAAGATCAACAAAGAGCAATGAAA      | Shirasawa et al. (2012) |              |
| AhTE0261  | ATATAACAAACTCCCCTCCTCCA       | TCACCACAAAACAACTCAAAGAA       | Shirasawa et al. (2012) |              |
| AhTE0278  | CTTTTCTTTTGTAAATGAATCTGTTTTT  | GCAATGCTAATATGCTAAATCGTT      | Shirasawa et al. (2012) |              |
| AhTE0283  | TCGGACACTTCATTATTTTCGAC       | TGTGTTTGTGGTTACGTCTGTTC       | Shirasawa et al. (2012) |              |
| AhTE0296  | ACTTCAAATCTGACGCACCTACT       | CAATTCATGTTCTAGCAAGGGTTA      | Shirasawa et al. (2012) |              |
| AhTE0303  | AAGATGCATACCTTTGGTTTTCT       | CTGCACTTAAGCCAACCTTCTCAT      | Shirasawa et al. (2012) |              |

| <b>ID</b> | <b>FORWARD PRIMER (5'-3')</b> | <b>REVERSE PRIMER (5'-3')</b> | <b>Source</b>           | <b>Alias</b> |
|-----------|-------------------------------|-------------------------------|-------------------------|--------------|
| AhTE0319  | ATTCGAAAACCCAAAATTCATT        | AAAGTTGGTGTGTCATTCTGAAAA      | Shirasawa et al. (2012) |              |
| AhTE0335  | GACAAAGGTAGAGGTTAATCCCA       | CCTAACATTGGGTTGGAGGA          | Shirasawa et al. (2012) |              |
| AhTE0359  | ATCGTTGCTTGTAGCACGG           | AAAAGCGCAAAGAAATGGGT          | Shirasawa et al. (2012) |              |
| AhTE0381  | TGCTTTTCCGGAGTCACAA           | TGCATGTAGCAGAAAGCCAG          | Shirasawa et al. (2012) |              |
| AhTE0416  | GAGTTACATCGGTATTGAATATGTGA    | CTCCGTGATTGAGGCGTTA           | Shirasawa et al. (2012) |              |
| AhTE0422  | TGGCGTAATCTTTTAAGAACCAA       | AGAATTAATGTCATCAAACGAATG      | Shirasawa et al. (2012) |              |
| AhTE0426  | CAACCCATGATTTGTGAATTAAG       | TGACTACAATGTTTGGTCATTTTG      | Shirasawa et al. (2012) |              |
| AhTE0446  | GTGCCACGAGGTACACGATA          | AGACACACACCACACGCATT          | Shirasawa et al. (2012) |              |
| AhTE0470  | AACTGTTGGATGCAGTGTGC          | CCCCACTCCCATTATTCCTT          | Shirasawa et al. (2012) |              |
| AhTE0477  | GGTGGTGGCCATTTCTCTT           | TTTGCCATTTTTGGTTCTG           | Shirasawa et al. (2012) |              |
| AhTE0478  | TGAAGCAGCCACACCATACT          | GACGGTTGACTAAAAATGTTGG        | Shirasawa et al. (2012) |              |
| AhTE0489  | TGACTACAATGTTTGGTCATTTTG      | GAACCACCCATGATTTGTGA          | Shirasawa et al. (2012) |              |
| AhTE0523  | AAAATTGAGCGGTATTAGACATCA      | GTGAGCACCTATCATCCACAAATA      | Shirasawa et al. (2012) |              |
| AhTE0524  | GTATGGGCCACTAATAAGCTATGG      | GGAATTCGGATGCTCAAAGTATAA      | Shirasawa et al. (2012) |              |
| AhTE0532  | AGGCAGTCCAAGCAAAGTGT          | TGTCAAATTCATTCAAAGGGG         | Shirasawa et al. (2012) |              |
| AhTE0536  | ATTTGGGGTTTGATGACAGG          | TCACACATGGACATCTTGCTT         | Shirasawa et al. (2012) |              |
| AhTE0540  | CCACTAGACTGAAGGTTGGTTG        | AGTTCGATGGTAGTGACCCG          | Shirasawa et al. (2012) |              |
| AhTE0553  | CATGCATGGACCTTACCTTG          | ACAGGAGGAGAAGCAGCCTT          | Shirasawa et al. (2012) |              |
| AhTE0565  | TATGGATTGAGGCCATGGAT          | TGTGCCATCCTAAAACACTCA         | Shirasawa et al. (2012) |              |
| AhTE0577  | GAGTTGGCTCTGTGATTTGTGA        | GCAAGGTGTATTAATGAAACCAA       | Shirasawa et al. (2012) |              |
| AhTE0586  | CATTGTCTCGTTCGCGTTTA          | GAACGTGGGGAAAGTCAAAA          | Shirasawa et al. (2012) |              |
| AhTE0635  | GAAGTGGGGTAGGGAACCAT          | CACAAACAACATAACTACCTTTCTTTT   | Shirasawa et al. (2012) |              |
| AhTE0639  | GCTTTTCATAGAAAACATTGAACCT     | CGCGGATTTAATTTGTTTGTT         | Shirasawa et al. (2012) |              |
| AhTE0654  | TGTTTTTATGGCTTGATCCCA         | TTACTTGCGTGCCACCATTA          | Shirasawa et al. (2012) |              |
| AhTE0658  | TGTTTTGGATGGTCACCTCA          | AAAGACCCATAAGCGAAGGC          | Shirasawa et al. (2012) |              |
| AhTE0659  | AGTGGGATTGGAGCATTTTG          | CTATTCGGATTGAAAAATTATAACA     | Shirasawa et al. (2012) |              |
| AhTE0674  | AATCCACTTACTCCCTTGCG          | CATCGTTATCTGCATGGTGG          | Shirasawa et al. (2012) |              |
| AhTE0678  | CATTTTCTTTTCTTTATGACCG        | AGGGAGCATACCCACATACA          | Shirasawa et al. (2012) |              |
| AhTE0690  | AAATTTTGAATGGGAGAAGC          | TTGTAACACATCAAATCAAACCA       | Shirasawa et al. (2012) |              |
| AhTE0696  | CTTTGTTTGTAGCCACACTTT         | CGGTATTTGCCGAATGCTTA          | Shirasawa et al. (2012) |              |
| AhTE0706  | GCCCTACAATCTATCATCCAATG       | TGAGGACTTTGATGTTGGCA          | Shirasawa et al. (2012) |              |
| AhTE0707  | TGTGGCTAAACAAACAAAGTACA       | TCCATGCTTGGTTCTGTGTC          | Shirasawa et al. (2012) |              |
| AhTE0709  | GCCACTCAACCGAATAAGA           | TGTTTTTGGCATCTTCATGG          | Shirasawa et al. (2012) |              |
| AhTE0711  | CACTGAAGGGATGCAGTGAA          | TGTGACATTGAAAAAGGCA           | Shirasawa et al. (2012) |              |

| <b>ID</b> | <b>FORWARD PRIMER (5'-3')</b> | <b>REVERSE PRIMER (5'-3')</b> | <b>Source</b>           | <b>Alias</b> |
|-----------|-------------------------------|-------------------------------|-------------------------|--------------|
| AhTE0718  | TTCCCATGCCAATAATGGTT          | TGATTTGGCCACACTTCAAA          | Shirasawa et al. (2012) |              |
| AhTE0725  | TCCATCATCCAATGGTCAAA          | CCTGCCACCCTGACTACT            | Shirasawa et al. (2012) |              |
| AhTE0726  | ACCTTTACATCCACAAGCC           | TCCATCATCCAAAGGTCAAA          | Shirasawa et al. (2012) |              |
| AhTE0756  | GCCCCGAGTTTCTGTTTTCAA         | GCAACACATCAAAATCAAACCA        | Shirasawa et al. (2012) |              |
| AhTE0761  | GCAACACATCAAAATCAAACCA        | AAGGAACTTCAAGTAAGACCCTTTC     | Shirasawa et al. (2012) |              |
| AhTE0771  | TGAAGTGTGGCCAAATCAAT          | GCTCGAAGATGGAAAATCAGA         | Shirasawa et al. (2012) |              |
| AhTE0775  | ACACTCACACACATGGTTCCT         | TCCATCATCCAAAGGTCAAA          | Shirasawa et al. (2012) |              |
| AhTE0777  | CCATTCAATCCATCATCCAA          | TTCATGTTCCATGTTCCCC           | Shirasawa et al. (2012) |              |
| AhTE0790  | CAAACAAAAACTAAAGAAAAGGACAA    | GGAGTGTGGCCAAATCAATAA         | Shirasawa et al. (2012) |              |
| AhTE0791  | GCTGACATAGCATAAAAATCTAGGA     | TGCCATCTTCATTGTAGTATCCA       | Shirasawa et al. (2012) |              |
| AhTE0794  | TGATTTGGCCACACTTCAAA          | CAAACCCGCCATTATCAATC          | Shirasawa et al. (2012) |              |
| AhTE0795  | ATCAAGCCCTACAATCTATCATCC      | ACGTTGCACGGAGCTTCTAC          | Shirasawa et al. (2012) |              |
| AhTE0796  | TGTTGTTTTTGTAAAGTGTGGC        | AGATGTCCACTTTCGTGCAA          | Shirasawa et al. (2012) |              |
| AhTE0797  | ACCCCTTCATACTGTGCCTG          | TGTGGCCAAATTAATAAATCACA       | Shirasawa et al. (2012) |              |
| AhTE0800  | TGAAGTGTGGCCAAATCAAT          | TCCCTACCTTTCACTTCTTATCCA      | Shirasawa et al. (2012) |              |
| AhTE0806  | TCCATCATCCAAAGGTCAAA          | TAAGAATCTGTGCGTTGCC           | Shirasawa et al. (2012) |              |
| AhTE0808  | TCAAATCAAATCAAGCCCTACA        | TTTCTAGCCGCCATATGTGA          | Shirasawa et al. (2012) |              |
| AhTE0810  | GGTCCTTTGAGTTGCCAAAA          | CATCCAATGGTCAAAATGATG         | Shirasawa et al. (2012) |              |
| AhTE0813  | TCATCCAATGGTCAAAATGA          | TGAAGGGTTATGAACTGGACAA        | Shirasawa et al. (2012) |              |
| AhTE0815  | TTGTAACACATCAAAATCAAACCA      | AAAAATATACTTTACCCCTCTTTTT     | Shirasawa et al. (2012) |              |
| AhTE0818  | TGTCATGGATTAAGATTATGACTAAAC   | GCAACACATCAAAATCAAACCA        | Shirasawa et al. (2012) |              |
| AhTE0820  | TTTTGGTTGAACCGATGAAA          | TTTATTGATTTGGCCACACTTT        | Shirasawa et al. (2012) |              |
| AhTE0824  | TTGGCCACACTTCAAATAAAAA        | CAGCCTCTTGAGTCAGGAATG         | Shirasawa et al. (2012) |              |
| AhTE0825  | CCGACAAATTTTTAGCGGTC          | TGTGGCCAAATTAATAAATCACA       | Shirasawa et al. (2012) |              |
| AhTE0839  | GCATGAGACAGGGGCACT            | TGAAGTGTGGCCAAATCAAT          | Shirasawa et al. (2012) |              |
| AhTE0840  | GCAACACATCAAAATCAAACCA        | TCCAATTTGTTTTGGAGGGA          | Shirasawa et al. (2012) |              |
| AhTE0845  | GCAACACATCAAAATCAAACCA        | TTTTCCAACCTGCAATGGCT          | Shirasawa et al. (2012) |              |
| AhTE0852  | GAATGAAGAACCAACCAATGC         | CACTCCATCATCTAAGGGTCAA        | Shirasawa et al. (2012) |              |
| AhTE0874  | TCCATCATCCAAAGGTCAAA          | ATTTTCACGGGAACAATGGA          | Shirasawa et al. (2012) |              |
| AhTE0882  | TCTAACCTACAATTTATCATCCAA      | TCGTTGGAAGCTGCAGTTAAT         | Shirasawa et al. (2012) |              |
| AhTE0887  | CCCTACACTCCATCATCTAAAGGT      | GGGAGACTATGCCATTTGA           | Shirasawa et al. (2012) |              |
| AhTE0888  | AACAAGCGCCAAGTACAACC          | GCAACACATCAAAATCAAACCA        | Shirasawa et al. (2012) |              |
| AhTE0893  | CCATGAAGGAGAAGACGAGC          | TCCATCATCCAAAGGTCAAA          | Shirasawa et al. (2012) |              |
| AhTE0903  | TCGTTGGAAGCTGCAGTTAAT         | TCTAACCTACAATTTATCATCCAA      | Shirasawa et al. (2012) |              |

| <b>ID</b>  | <b>FORWARD PRIMER (5'-3')</b> | <b>REVERSE PRIMER (5'-3')</b> | <b>Source</b>           | <b>Alias</b> |
|------------|-------------------------------|-------------------------------|-------------------------|--------------|
| AhTE0906   | TTGGCCAAATTTTAAATAAAAACAA     | GGTAATTTATTCGAGACTGCAATG      | Shirasawa et al. (2012) |              |
| AhTE0908   | TGAAGTGTGGCCAAATCAAT          | TCCACCCAATCTTTATAGGTTTTT      | Shirasawa et al. (2012) |              |
| AhTE0913   | GGTAAAAGCTAAGACAGGCTCAA       | TGAAGTGTGGCCAAATCAAT          | Shirasawa et al. (2012) |              |
| AhTE0914   | CCCTACACTCCATCATCTAAAGG       | GGCTATTGCACGTTGCTTTT          | Shirasawa et al. (2012) |              |
| AhTE0918   | TCAAACAAAATTTTACGAGAG         | TGTGAAAATATATCACTTTGACCATT    | Shirasawa et al. (2012) |              |
| AhTE0922   | TGAAGTGTGGCCAAATCAAT          | CCAAACAGAGCTCCATCACA          | Shirasawa et al. (2012) |              |
| AhTE0923   | TCAAATCTAACCTTCAATTCATC       | CTCCCAACCAATGTGTGCTA          | Shirasawa et al. (2012) |              |
| AhTE0936   | GGAAGTAGCTTTTATGCTTTTGTCA     | CATCATTTTGACCATTGGATG         | Shirasawa et al. (2012) |              |
| AhTE0940   | GCAACACATCAAATCAAACCA         | CCGCATCATCTTAGAACGAA          | Shirasawa et al. (2012) |              |
| AhTE0945   | TGTGGAGGATTCAGTTCTGC          | GCAACTACTCCTATGAAGATGCC       | Shirasawa et al. (2012) |              |
| AhTE0959   | GCATCCTCTTCTGCATTCTCT         | GGCATCTTCATGGGAGTAGC          | Shirasawa et al. (2012) |              |
| AhTE0985   | CAGAATTTTCCAGAGGCTCG          | TCCATCATCCAAAGGTCAAA          | Shirasawa et al. (2012) |              |
| AhTE0986   | CGGCCGAAGTATCTTAGTTGA         | CAATCTATCATCCAATGGTCAAAA      | Shirasawa et al. (2012) |              |
| AhTE0994   | GCCTAGAGGCCAAAACCTTGAA        | TGGCTAAATAAATAAACCACTTTT      | Shirasawa et al. (2012) |              |
| AhTE1009   | TCCTTTTATATGAACTAAGGCGATT     | TGGGAGTACCCACCATTTTT          | Shirasawa et al. (2012) |              |
| AhTE1016   | CAGCCTTTTACTTTGTTAGCCA        | TGATTTGGCCACACTTCAAA          | Shirasawa et al. (2012) |              |
| AHGA102053 | TGAAGTCGATTGCACCTGAG          | GCTAATAAGCCAGCCCACAC          | Zhou et al. (2016)      |              |
| AHGA14239  | CGCCGTAAAGCGAAGAATAA          | GAAAATGATGCCATAAAGCG          | Zhou et al. (2016)      |              |
| AHGA152194 | AGTGAGGTTGGAGATGGGTG          | AAGAGCGAAATCAATGGGAA          | Zhou et al. (2016)      |              |
| AHGA152207 | TCCGAAACCCAAAAGAAGA           | AATAATTTTGCACAAGGCCG          | Zhou et al. (2016)      |              |
| AHGA161466 | GACCAATATCCAATGTGCC           | GCCGAAGCAACAAATTGACT          | Zhou et al. (2016)      |              |
| AHGA161468 | CCCTCTTTTCTCCCTCTGC           | TCCGCCATACAAAGCTAACC          | Zhou et al. (2016)      |              |
| AHGA161495 | GGCATTAAATCAAATATTAACCTCAA    | TGGGTCTTTATAAAATTAAGCCA       | Zhou et al. (2016)      |              |
| AHGA161510 | GCAAAGATGGCGATGAAGTT          | GAAATCCAGAAATCAAGCTGC         | Zhou et al. (2016)      |              |
| AHGA164448 | TGACAAATGACTGAAACCAACA        | TGTCACGAAAAATATTGTGGCT        | Zhou et al. (2016)      |              |
| AHGA171408 | TTGCCAAAATTTAGGACTTCAAA       | TCCTGTCTCTGTAAACAAACGC        | Zhou et al. (2016)      |              |
| AHGA176194 | TGGCATGCCTCTCTTTCTCT          | CCTCTTCTTAGAGTTATCGGTTGC      | Zhou et al. (2016)      |              |
| AHGA178360 | CCCAATTTAGTCCCTGATTCC         | TGATGGTTGCTTTCTGTTGTG         | Zhou et al. (2016)      |              |
| AHGA193642 | TGAACAATTGCGATTTGGAC          | CAATGACGATTGACGACGAC          | Zhou et al. (2016)      |              |
| AHGA195553 | TCCCTACTCCATCTGCTGCT          | AGGGTTTTCGTTGAGGAGGTT         | Zhou et al. (2016)      |              |
| AHGA214492 | AGATCTCCCGACCCAATTCT          | TCTCTCTAGCGGGACTCAATTT        | Zhou et al. (2016)      |              |
| AHGA221480 | TCAGAATTTTTCAGATTCGGGG        | ATGCAAACAGTTTCGGTCCTC         | Zhou et al. (2016)      |              |
| AHGA24894  | TGAAATTAAGGGGTGTTAGGG         | GCGGTTGAGATTGCAGTGTA          | Zhou et al. (2016)      |              |
| AHGA25786  | AATTGCAATCCACTGCATTAGT        | ACCCTCATTGCTCCAGTCAG          | Zhou et al. (2016)      |              |

| <b>ID</b>  | <b>FORWARD PRIMER (5'-3')</b> | <b>REVERSE PRIMER (5'-3')</b> | <b>Source</b>             | <b>Alias</b> |
|------------|-------------------------------|-------------------------------|---------------------------|--------------|
| AHGA284837 | CCGCTAAAAGTTTGTCTGCTAA        | TTGCACAGGCATTGACTCTC          | Zhou et al. (2016)        |              |
| AHGA327396 | TCTTAAATTCGAACCGCGAC          | TGGAAACACAGCGACAGAAG          | Zhou et al. (2016)        |              |
| AHGA329002 | TTTTTAAGAGCATAAAACAAGAAGGA    | TGTCACGATTA AAAAGTTTCGG       | Zhou et al. (2016)        |              |
| AHGA361224 | ATTCTGGGAAGCCTGGAGAT          | AATTTTGTGTTTCGCTTGCAT         | Zhou et al. (2016)        |              |
| AHGA363491 | ATTTATCCGCCAGTCCAAT           | TGCCGTTAACGATTCTGTGA          | Zhou et al. (2016)        |              |
| AHGA363492 | TAGAGGGGAAGGGGTGTCAT          | TCATCATGTGGGTATTTCTTTTT       | Zhou et al. (2016)        |              |
| AHGA364915 | GGACAGCAGGTATTGGAGGA          | CTCATCAGACTCAATGCCGA          | Zhou et al. (2016)        |              |
| AHGA364936 | TCATCTCTCAGCCCACATCA          | TTGTCAAATAAATCGGACAAAA        | Zhou et al. (2016)        |              |
| AHGA367823 | TCACGATCCCTTCTCCTTCA          | AGGGGGAGTCAAAGGAAAGA          | Zhou et al. (2016)        |              |
| AHGA374228 | GAAGGGAGCATTTTGAACAA          | GTGTCCTAAATTCGAACCGC          | Zhou et al. (2016)        |              |
| AHGA375182 | GATACCTGAAATTTGAATTAGTTAGGA   | AAACGCATAACTATGAAAAGTGG       | Zhou et al. (2016)        |              |
| AHGA44674  | CCGAATTACTCGCTTAACAACC        | GAAAATGGGGATCCATTCAA          | Zhou et al. (2016)        |              |
| AHGA44686  | AAGTGGAAATACTTTCTCTTTCTTTTT   | TTAGCTTAGTTATTACTTTTTCTTGC    | Zhou et al. (2016)        |              |
| AHGA61563  | CCTGGTCAACCATCTCTTTCA         | TGGTCTTTAAGGTTTTTGTGTCA       | Zhou et al. (2016)        |              |
| AHGA61572  | TAAACCTTCGCAAACCATCC          | GCTCAGGAACGAAAATGTCC          | Zhou et al. (2016)        |              |
| AHGA65328  | TTACCTAAGGCCGACACCAC          | ACAACAACAACGGGAGGTTT          | Zhou et al. (2016)        |              |
| AHGA7048   | TGCCATTTGAGCATTTAACG          | GGGGATGAGGGGAAATAATG          | Zhou et al. (2016)        |              |
| AHGA72558  | ATTCAGGGACCATTTTGGG           | ACGCTGCGACACTAAATTTCG         | Zhou et al. (2016)        |              |
| AHGA72569  | CCATATCATAGCCGCCAAGT          | TACATCCACGATGCAGAAGG          | Zhou et al. (2016)        |              |
| AHGA75537  | AACCAACCTCAATCTACAGCA         | GAAGAATAGGCTTATTTCTCGAAGG     | Zhou et al. (2016)        |              |
| AHGA75538  | ACAGAATGGTTTCGGTGAGG          | CGTGAGATTTACCGTCGGAT          | Zhou et al. (2016)        |              |
| AHGA96458  | CGGACTTCTCCACTTCCAAA          | GGCCTTTGTTTCTTTAGGGC          | Zhou et al. (2016)        |              |
| AHGA96464  | CCGTCACCTCCTCTTCTCTG          | GTCGACTCCTGCCAATCTA           | Zhou et al. (2016)        |              |
| AHGA96466  | GTGGCACATAGACATCACCG          | CGCAAACAAACACAACCAAA          | Zhou et al. (2016)        |              |
| AHGA98567  | TTCAGAAGGCAGTGTGCGATG         | GATATAAGACCCCGGGATG           | Zhou et al. (2016)        |              |
| AHGA98575  | AGCCTCTCAATTCCCTTGGT          | CAAAACACATCCCCAAGGTC          | Zhou et al. (2016)        |              |
| ARS590     | ACTAACAGCGTAGCCGTCGT          | ACCCCTCTCAGTGTTTTCCA          | He et al. (unpublished)   |              |
| ARS702     | ATGGCACATGAACAGCAAAA          | TCTCTTGCAAGCAAAATCC           | He et al. (unpublished)   |              |
| ARS715     | CGATCCTAGACCCGATGAAA          | TCGCGAAACTATAAGACCAACA        | He et al. (unpublished)   |              |
| ARS731     | TGTCACGATTA AAAAGTTTCGG       | TGGTAATTTTGCAGCATTATCTGT      | He et al. (unpublished)   |              |
| ARS742     | GATTTAATGGGGGATGAGGG          | TCACCCACACCTTTTGTATT          | He et al. (unpublished)   |              |
| AT43       | ACAAAGCAGAGAACCACCGG          | GGTGGCATTTTGCTGTTCCA          | Jiang et al.(unpublished) |              |
| AT68       | ACTTTGCTTTGCTTTCAGCCT         | AGTCACACTGATGATCACAGCA        | Jiang et al.(unpublished) |              |
| AT77       | AGCACACTTGAAAGGTGAGAA         | TGAATCGCCACTACATCCCCG         | Jiang et al.(unpublished) |              |

| <b>ID</b> | <b>FORWARD PRIMER (5'-3')</b> | <b>REVERSE PRIMER (5'-3')</b> | <b>Source</b>                | <b>Alias</b> |
|-----------|-------------------------------|-------------------------------|------------------------------|--------------|
| AT79      | TCCATTCCTTTTCCCTTTCTCT        | TTGTCACTACACCAAGCTAAGT        | Jiang et al.(unpublished)    |              |
| EE16      | ATGGGACCACGAACATTTGA          | GAGCACGTTCAAGCACTCATT         | Guo et al. (2009)            |              |
| EE22      | AAGGTAAAGAAGAAGCGGAAAG        | TTTCCCACTCCAGAATCACC          | Guo et al. (2009)            |              |
| EE51      | GGGAGGTTTGGGATCAACT           | GACCTGCTGGTTCGGATAA           | Guo et al. (2009)            |              |
| EM142     | GAACCTTCCAGGACAAACTCG         | CGTCTTCCTGCTCGTAATCG          | Guo et al. (2009)            |              |
| EM87      | CATGCTCCTCCAATTTATTACG        | CGAGACTTGAGTGCCTTGTTG         | Guo et al. (2009)            |              |
| GA1       | GCGTGAAATGAGTGTTGTGAG         | CATAGCCACCATAGACACCAA         | Budiman et al. (unpublished) |              |
| GA110     | GGAGAACCAGTGACGTGACATA        | GGATTAATTCTGATACCATGAAAGG     | Budiman et al. (unpublished) |              |
| GA156     | CTACTCCCTCTGCTGCTTCCT         | TAGGGTTTTCGTTGAGGAGGTT        | Budiman et al. (unpublished) |              |
| GA27      | CATCCAAAGCCAAAGTTCACA         | GCTTAGCTTGCTTTGATTAGGG        | Budiman et al. (unpublished) |              |
| GA72      | ACTTTGGTGGCTTTCCTTCAT         | TCTCTGTGCCCTCTTCTTCA          | Budiman et al. (unpublished) |              |
| gi832     | GCCACTTTATTCTAAGCACTCC        | AAGAGACCACACGCTCACA           | Moretzsohn et al. (2005)     |              |
| GM1445    | GTTGGCAGAGTGGAAGAAGT          | CGCTTTTATAATAGGCCGAGGT        | Guo et al. (2012)            |              |
| GM1539    | GCTCTTGTTAATTCGATTCCA         | CCTCATCAGAGTCAGGCAAGA         | Guo et al. (2012)            |              |
| GM1555    | CGTAGACGTGAACCACTACCAA        | CGCCTAGTGTCTCAGAAAACG         | Guo et al. (2012)            |              |
| GM1577    | GCGGTGTTGAAGTTGAAGAAG         | TAACGCATTAACCACACACCA         | Guo et al. (2012)            |              |
| GM1713    | TCTGCATGAACTGGACCATC          | CACACACACAACACTCAACACA        | Guo et al. (2012)            |              |
| GM1839    | GAATCTGAGAGTGAAACAGAGCA       | GAATTTGGGAAGACGAGGTTG         | Guo et al. (2012)            |              |
| GM1854    | CCCCAACCCTTTCTTTCTCTT         | TGGTGGTGTTTTGTGTTGTT          | Guo et al. (2012)            |              |
| GM1901    | GAAACACCGATATTTTCGATACA       | TGACGAGCAAGTCATGTATGTG        | Guo et al. (2012)            |              |
| GM1922    | GGAGAGTCGGTGAGAGGAGAG         | CGCTCGTTTTCTCTTTCATT          | Guo et al. (2012)            |              |
| GM1937    | TTCATCCTCTGCTTCCTTTGA         | TGACCAAACCCATCATCATCT         | Guo et al. (2012)            |              |
| GM1954    | GAGGAGTGTGAGGTTCTGACG         | TGGTTCATTGCATTTGCATAC         | Guo et al. (2012)            |              |
| GM1959    | GTGTTCTCAGCCATCTTTTCG         | GTGAAGGTGTTGTGAATGCAG         | Guo et al. (2012)            |              |
| GM1996    | CATCCCATCATTTTCCCTCTT         | TACAGTGAAGGTGGGATCCTG         | Guo et al. (2012)            |              |
| GM2032    | GCCGATGATGTACGTTTCTTC         | GAGACGGCATGTCAAAGAAT          | Guo et al. (2012)            |              |
| GM2106    | TTTGACATCATTTGTTGATTGTTG      | GATGAGGCCATTAAGGAGTGA         | Guo et al. (2012)            |              |
| GM2165    | CTACGCGCATCGCATAATATC         | GTGAGATGGGGTTGGAGATTT         | Guo et al. (2012)            |              |
| GM2196    | CCTTGCTTTTCGGCTTCTATT         | GAGCTTTGGCTTTTGTGTTG          | Guo et al. (2012)            |              |
| GM2246    | GCAATTTATGTGCACCCTTT          | CGCTTGACACCAATGAAGTCT         | Guo et al. (2012)            |              |
| GM2284    | ACACCCCAAATAGCTTCGTCT         | TCCACAACACCAACCTTCTTC         | Guo et al. (2012)            |              |
| GM2313    | GATGCTGCTAAATCGAGATGC         | GTTGTTTTGTTTACGCCAGT          | Guo et al. (2012)            |              |
| GM2807    | TTGGAATCTGTTTGGATGAGC         | TCGAGCCTTCTACTTGATTTGA        | Guo et al. (2012)            |              |
| GM2808    | TGTTGCTTTGTTCTGCCTAATG        | GGATGAATAAGATTAAGATGGCTGT     | Guo et al. (2012)            |              |

| <b>ID</b> | <b>FORWARD PRIMER (5'-3')</b> | <b>REVERSE PRIMER (5'-3')</b> | <b>Source</b>            | <b>Alias</b> |
|-----------|-------------------------------|-------------------------------|--------------------------|--------------|
| GM2839    | TCTCTTTCTTTTCCTCATTCTCTCA     | CCACAGCCATAGCAGCAGAG          | Guo et al. (2012)        |              |
| GM630     | CAGCAATTCAGCAAATAATGAA        | TCCTCCCACGTCCTTTTATTT         | Guo et al. (2012)        |              |
| GNB0486   | CATTGCAGTTTCCCAGGAGT          | TAGCACTCAGTCGGTCTCCA          | Wang et al. (2011)       |              |
| GNB1040   | TCACTTTTGAGTGTGCCTGC          | TCCATTAGTGAGAATACCTAACAAG     | Wang et al. (2012)       |              |
| GNB136    | GATTTAATGGGGGATGAGGG          | TCACCCACACCTTTTGATT           | Wang et al. (2012)       |              |
| GNB138    | CAGCCCGATGAAGGAATAAA          | CGACCTAAACTCCGTAGGCA          | Wang et al. (2012)       |              |
| GNB159    | CGAATCGGAACACCGTACTT          | TTTTAAATGTTTGGCCCAGG          | Wang et al. (2012)       |              |
| GNB218    | GCCATATTTCTGTCAAATCAAAA       | TACCATCTGGTTTACCCCA           | Wang et al. (2012)       |              |
| GNB320    | GAATTCCTGGCTCGAACTTG          | ACCCCTCCATTTCTGCTTCT          | Wang et al. (2012)       |              |
| GNB329    | CCCTTTTTCGCTTTCTTCT           | GTTCTCGTTTGTGCCCTCTC          | Wang et al. (2012)       |              |
| GNB377    | TGAATACAAGCTATTTGGTGCAT       | GGAGTGAGTGAAGAATTGTTGAAA      | Wang et al. (2012)       |              |
| GNB38     | TCCAGGGTCACTGTTCTTCC          | CGTTGGTTTCATCAAAGGCT          | Wang et al. (2012)       |              |
| GNB619    | TAACCACAAGCAAGGCAACA          | AATGGCTTCCAGAAGCTTGA          | Wang et al. (2012)       |              |
| GNB652    | CAAAGTCGCACAAAGTGGAA          | AACTCCGCAGGCTGTGACTA          | Wang et al. (2012)       |              |
| GNB87     | GCCTGTAGCACTGCAAACAA          | GGAATAGGGGCAAGAATGGT          | Wang et al. (2012)       |              |
| GNB877    | TCAGCGCTACGATGAATAA           | TGGGTATCCACAACCACAAA          | Wang et al. (2012)       |              |
| IPAHM037  | CGTATGCATTATAAGTGCTCGACAA     | AATCCGATATCCGCTTCGAC          | Cuc et al. (2008)        |              |
| IPAHM093  | TCCATCGTTAGTGGCACTGT          | GTCGACTCCTGCCAATCTA           | Cuc et al. (2008)        |              |
| IPAHM105  | CAGAGTTTGGGAATTGATGCT         | GCCAGATCTGAGCAAGAACC          | Cuc et al. (2008)        |              |
| IPAHM108  | CTTGTCAACTCTGTGACTTAGCA       | CATGAACAATTACACCCAGTCA        | Cuc et al. (2008)        |              |
| IPAHM123  | CGGAGACAGAACACAAACCA          | TACCTGAGCCTCTCTCTCG           | Cuc et al. (2008)        |              |
| IPAHM282  | AAGCCTTTGCGAATATAACCA         | TGCAGGACTTGTATTTTGAGGA        | Cuc et al. (2008)        |              |
| IPAHM290  | CCACCGCTGATGTGTAATTGTA        | GACGTGTAGTTGAAAACAACAGTATCA   | Cuc et al. (2008)        |              |
| IPAHM354  | TCCGAATCAAAATTGGCACT          | ACCTCTCCCTCTCAAGTTTTTGT       | Cuc et al. (2008)        |              |
| IPAHM468  | GGCTTTTGAAGTTCCTTCC           | TATGCCTCTTCCCTTCCTT           | Cuc et al. (2008)        |              |
| IPAHM475  | GTGATTTCTGGTTGGTGCT           | AGCCTCAGCTGGTTTTGCT           | Cuc et al. (2008)        |              |
| IPAHM73   | ACTAACAGCGTAGCCGTCGT          | ACCCCTCTCAGTGTTTTCCA          | Cuc et al. (2008)        |              |
| ML1G04    | GAAGGACTGAAGACTACTTT          | ATCCAGTAGATTACGTTACA          | Moretzsohn et al. (2005) |              |
| PM204     | TGGGCCTAAACCAACCTAT           | CCACAAACAGTGCAGCAATC          | He et al. (2003)         |              |
| PM36      | ACTCGCCATAGCCAACAAC           | CATCCCACAACCTCCACAT           | He et al. (2003)         |              |
| PM377     | ACGCTCACATGTTTGCTTTG          | GCTCGATTTGATTTGGGTGA          | He et al. (2003)         |              |
| PM65      | GGACGTCTGGCTGCTAGAGA          | TCGGCATCAAAACAGTGAGA          | He et al. (2003)         |              |
| PM675     | AATACCCTTCCCAATCACC           | TGCTTCTGCTCGATGTTCTG          | He et al. (2003)         |              |
| PMc348    | TGCCTGTAAGTGTGGACCAA          | ACTCCAAAACGGGGAGTGTT          | He et al. (2003)         |              |



| <b>ID</b>    | <b>FORWARD PRIMER (5'-3')</b> | <b>REVERSE PRIMER (5'-3')</b> | <b>Source</b>            | <b>Alias</b> |
|--------------|-------------------------------|-------------------------------|--------------------------|--------------|
| PMc660       | CTATTCGACGAGTTGCGATG          | AGGTCCGCTAGGGTTTTTCAT         | He et al. (2003)         |              |
| pPGPseq1B9   | CGTTCCTTTGCCGTTGATTCT         | AGCACGCTCGTTCCTCATT           | Ferguson et al. (2004)   |              |
| pPGPseq2F10  | GTGGTGGCGGTGTAATCTTT          | AAACGCAAAACTCTCCCTCA          | Ferguson et al. (2004)   |              |
| pPGPseq2G3   | ATTCACAAGGGGACAGTTGC          | ATTCAAGCCTGGGAAACAGA          | Ferguson et al. (2004)   |              |
| pPGPseq3E5   | CGATGAGGACAGAGACACGA          | CGCTTGAACCCGACTATTTT          | Ferguson et al. (2004)   |              |
| pPGPseq4E8   | ACCATTGCACTTTGAAGCTCT         | GCTTGGTTTGGGTTAGTTTGA         | Ferguson et al. (2004)   |              |
| pPGPseq5D1   | TGGCCAAAACAACCTGATTGA         | TCCCAACTTTTCCGTTCTTG          | Ferguson et al. (2004)   |              |
| pPGPseq7H6   | CATCCTCACGGGAGTCAGAT          | ATACCTACGCGTTGTGGAGC          | Ferguson et al. (2004)   |              |
| pPGSSeq11C8  | GTGATTGGTTAGCCTGATTA AAA      | TGTTTGGAAAGGAAAATGGA          | Ferguson et al. (2004)   |              |
| pPGSSeq13B7  | TTGAGAACACAAATGGCACA          | TGTCAAGTGGTCAAAATCTTTC        | Ferguson et al. (2004)   |              |
| pPGSSeq15C12 | ACAATGCAATGACCGTTGTT          | TTGTTGCATGAGAACGTGAA          | Ferguson et al. (2004)   |              |
| pPGSSeq15D6  | CAACGCCGAGACTAGAGACC          | GGTCCCTGCTCCTTCTTCT           | Ferguson et al. (2004)   |              |
| pPGSSeq17F6  | CGTCGGATTTATCTGCCAGT          | AGTAGGGGCAAGGGTTGATG          | Ferguson et al. (2004)   |              |
| pPGSSeq18E7  | CAACGCCGAGACTAGAGACC          | GGTCCCTGCTCCTTCTTCT           | Ferguson et al. (2004)   |              |
| pPGSSeq19C3  | TCATCGCCAAACTCTTCTCC          | TCGAAGAGTGCATGTTGACC          | Ferguson et al. (2004)   |              |
| pPGSSeq9B4   | CATTGTTAATGCACCTTTGGAA        | GGCAGATTTGGTTATTGCCT          | Ferguson et al. (2004)   |              |
| pPGSSeq9G5   | CAAATTGTGCAGCCAAGAGA          | CATATGCCCAGGAAGAGGAA          | Ferguson et al. (2004)   |              |
| TC11A02      | AATCGGAATGGCAAGAGACA          | AGAGCAAAGGGCGAATCTATG         | Moretzsohn et al. (2005) |              |
| TC11A04      | ACTCTGCATGGATGGCTACAG         | CATGTTTCGGTTTCAAGTCTCAA       | Moretzsohn et al. (2005) |              |
| TC11H06      | CCATGTGAGGTATCAGTAAAGAAAGG    | CCACCAACAACATTGGATGAAT        | Moretzsohn et al. (2005) |              |
| TC19B11      | ATCTCTTCCAACAGTTTGGGG         | ATGCATCGCAAACATCACTCT         | Macedo et al. (2012)     |              |
| TC19E01      | ATCAGAAACAGAACCCCTGGAGA       | GGGGAAGAAGAAAGCGGA            | Macedo et al. (2012)     |              |
| TC1A02       | GCAATTTGCACATTATCCGA          | CATGTTTCGGTTTCAAGTCTCAA       | Moretzsohn et al. (2005) |              |
| TC1A08       | AAGGGGTTAAGGGCATGACT          | CCACAAATGGGTCGTCGAT           | Moretzsohn et al. (2005) |              |
| TC1B02       | AACATGCATGCAAATGGAAA          | GCCAAAGTCACTTGTTTGCTT         | Moretzsohn et al. (2005) |              |
| TC1E01       | CAGCAAAGAGTCGTCAGTCG          | GAAAGTTCACTTGAGCAAATTCA       | Moretzsohn et al. (2005) |              |
| TC1G04       | TGCTGTGAGAGAAATGGCAG          | GCGCATTCTTCGATTAAAGG          | Moretzsohn et al. (2005) |              |
| TC23C08      | AGCAGAGTGGAAAACGAAGAAG        | GTCAGTTTGTGAATCGGGTTTT        | Macedo et al. (2012)     |              |
| TC23F04      | CACGTGTAATAGTTGCTCAAAAT       | TATATGCATCAGACTCTCCAGC        | Macedo et al. (2012)     |              |
| TC27H12      | TAACGAATGACATCAATCCCTG        | TCTCACTTTGCACTCTCCTCAA        | Macedo et al. (2012)     |              |
| TC2A02       | CTCCCTTGTGGGTATGTGGT          | GGCTCCCATTCATTCTCAA           | Moretzsohn et al. (2005) |              |
| TC2D06       | AGGGGGAGTCAAAGGAAAGA          | TCACGATCCCTTCTCCTTCA          | Moretzsohn et al. (2005) |              |
| TC2E05       | GAATTTATAAGGCGTGCGA           | CCATCCCTTCTCCTTCA             | Moretzsohn et al. (2005) |              |
| TC3H02       | CTCTCCGCCATCCATGTAAT          | ATGGTGAGCTCGACGCTAGT          | Moretzsohn et al. (2005) |              |

| <b>ID</b> | <b>FORWARD PRIMER (5'-3')</b> | <b>REVERSE PRIMER (5'-3')</b> | <b>Source</b>            | <b>Alias</b> |
|-----------|-------------------------------|-------------------------------|--------------------------|--------------|
| TC41A10   | GTTTTGCTTCCTAATAATAAAGG       | ATTCCCAAACCTCTTCTCTC          | Macedo et al. (2012)     |              |
| TC4A02    | ATTCAAATCGGAATGGCAAG          | GAGCAAAGGGCGAATCTATG          | Moretzsohn et al. (2005) |              |
| TC4G05    | AACCCACTACGGGACTACCC          | ACGACGTGGAGGAGAAGAGA          | Moretzsohn et al. (2005) |              |
| TC4H02    | ACCGCAAACCTCATCCATCTC         | GATAGCGTCAGAGGCAGAGG          | Moretzsohn et al. (2005) |              |
| TC5D01    | CATTGACCACTCACATCCGT          | GATGGGAGTGTGTATTTCGGC         | Moretzsohn et al. (2005) |              |
| TC6E01    | CTCCCTCGCTTCCTCTTTCT          | ACGCATTAACCACACACCAA          | Moretzsohn et al. (2005) |              |
| TC7A02    | CGAAAACGACACTATGAAACTGC       | CCTTGGCTTACACGACTTCCT         | Moretzsohn et al. (2005) |              |
| TC7C06    | GGCAGGGGAATAAAACTACTAACT      | TTTTCCCTTCCTTCTCCTTTGTC       | Moretzsohn et al. (2005) |              |
| TC9C06    | CAAATGGCAGAGTGCGTCTA          | CCCTCCTGACTGGGTCCT            | Moretzsohn et al. (2005) |              |
| TC9C08    | ACTTTTGGGGCAGGATGAG           | GCCTCTATTGCTGAGATTATTGC       | Moretzsohn et al. (2005) |              |
| TC9F04    | CCTAAACAACGACAAACTCA          | AAGCACAACACAGAACCCTAAA        | Moretzsohn et al. (2005) |              |
| TC9F10    | ATCACAATCACAGCTCCAACAA        | GGCAAGTCTAATCTCCTTTCCA        | Moretzsohn et al. (2005) |              |
| TC9H08    | GCCAAAGGGGACCATAAAC           | TCCATCTTCATCTCATCCAC          | Moretzsohn et al. (2005) |              |
