# Supplementary material for: Development of SSR markers and identification of major quantitative trait loci controlling shelling percentage in cultivated peanut (Arachis hypogaea L.)
Source: PubMed Central journal article supplement (PMC5511596; doi:10.1007/s00122-017-2915-3), 2017-05-15
Supplement: 122_2017_2915_MOESM5_ESM.pdf [file 122_2017_2915_MOESM5_ESM.pdf]

**Table S5 Segregation of the genotypes of the 830 polymorphic loci in the RIL population.**

| Nr | Chromosome | Locus       | a   | h  | b   | c  | d  | -  | X2    | Df | Signif. | Classification |
|----|------------|-------------|-----|----|-----|----|----|----|-------|----|---------|----------------|
| 1  | A01        | AHGS1930    | 106 | 11 | 75  | 0  | 0  | 3  | 5.43  | 2  | *       | [a:h:b]        |
| 2  | A01        | AhTE0800    | 98  | 0  | 0   | 97 | 0  | 0  | 0.9   | 1  | -       | [a:h+b+c]      |
| 3  | A01        | AGGS2728    | 93  | 0  | 102 | 0  | 0  | 0  | 13.44 | 2  | ****    | [a:h:b]        |
| 4  | A01        | AHGS1650    | 100 | 11 | 83  | 0  | 0  | 1  | 1.7   | 2  | -       | [a:h:b]        |
| 5  | A01        | AhTE0725    | 118 | 0  | 0   | 77 | 0  | 0  | 14.56 | 1  | *****   | [a:h+b+c]      |
| 6  | A01        | AhTE0795    | 0   | 0  | 115 | 0  | 80 | 0  | 11.46 | 1  | *****   | [a+h+d:b]      |
| 7  | A01        | AhTE0994    | 111 | 0  | 0   | 84 | 0  | 0  | 7.91  | 1  | ****    | [a:h+b+c]      |
| 8  | A01        | AGGS0300    | 97  | 3  | 86  | 0  | 0  | 9  | 7.52  | 2  | **      | [a:h:b]        |
| 9  | A01        | AGGS1840    | 0   | 0  | 98  | 0  | 95 | 2  | 1.18  | 1  | -       | [a+h+d:b]      |
| 10 | A01        | AGGS1572    | 80  | 2  | 103 | 0  | 0  | 10 | 11.49 | 2  | ****    | [a:h:b]        |
| 11 | A01        | AGGS1451    | 88  | 6  | 86  | 0  | 0  | 15 | 2.64  | 2  | -       | [a:h:b]        |
| 12 | A01        | AhTE0678    | 95  | 8  | 91  | 0  | 0  | 1  | 1.58  | 2  | -       | [a:h:b]        |
| 13 | A01        | AGGS0005    | 95  | 14 | 79  | 0  | 0  | 7  | 1.91  | 2  | -       | [a:h:b]        |
| 14 | A01        | AhTE0233-2  | 0   | 0  | 91  | 0  | 96 | 8  | 0.24  | 1  | -       | [a+h+d:b]      |
| 15 | A01        | AGGS2508    | 108 | 0  | 83  | 0  | 0  | 4  | 16.22 | 2  | *****   | [a:h:b]        |
| 16 | A01        | AGGS1064    | 102 | 5  | 77  | 0  | 0  | 11 | 7.54  | 2  | **      | [a:h:b]        |
| 17 | A01        | GA110       | 97  | 13 | 85  | 0  | 0  | 0  | 0.85  | 2  | -       | [a:h:b]        |
| 18 | A01        | AGGS2317    | 95  | 13 | 83  | 0  | 0  | 4  | 0.91  | 2  | -       | [a:h:b]        |
| 19 | A01        | AHGS1294    | 98  | 13 | 83  | 0  | 0  | 1  | 1.3   | 2  | -       | [a:h:b]        |
| 20 | A01        | Ad01A11348  | 98  | 12 | 83  | 0  | 0  | 2  | 1.24  | 2  | -       | [a:h:b]        |
| 21 | A01        | AHGA374228  | 94  | 12 | 86  | 0  | 0  | 3  | 0.36  | 2  | -       | [a:h:b]        |
| 22 | A01        | AhTE0233-1  | 101 | 0  | 0   | 94 | 0  | 0  | 1.9   | 1  | -       | [a:h+b+c]      |
| 23 | A01        | AGGS1213    | 96  | 12 | 86  | 0  | 0  | 1  | 0.55  | 2  | -       | [a:h:b]        |
| 24 | A01        | AGGS0331    | 94  | 12 | 73  | 0  | 0  | 16 | 2.69  | 2  | -       | [a:h:b]        |
| 25 | A01        | AHGA329002  | 92  | 13 | 82  | 0  | 0  | 8  | 0.73  | 2  | -       | [a:h:b]        |
| 26 | A01        | AHGA367823  | 96  | 13 | 85  | 0  | 0  | 1  | 0.73  | 2  | -       | [a:h:b]        |
| 27 | A01        | ARS731      | 94  | 14 | 76  | 0  | 0  | 11 | 2.46  | 2  | -       | [a:h:b]        |
| 28 | A01        | AHGA171408  | 94  | 14 | 80  | 0  | 0  | 7  | 1.57  | 2  | -       | [a:h:b]        |
| 29 | A01        | AHGA164448  | 95  | 13 | 81  | 0  | 0  | 6  | 1.23  | 2  | -       | [a:h:b]        |
| 30 | A01        | AHGA375182  | 92  | 13 | 76  | 0  | 0  | 14 | 1.78  | 2  | -       | [a:h:b]        |
| 31 | A01        | AGGS2030    | 95  | 13 | 84  | 0  | 0  | 3  | 0.76  | 2  | -       | [a:h:b]        |
| 32 | A01        | AHGS1974    | 91  | 13 | 85  | 0  | 0  | 6  | 0.33  | 2  | -       | [a:h:b]        |
| 33 | A01        | AHGS1910    | 94  | 12 | 84  | 0  | 0  | 5  | 0.56  | 2  | -       | [a:h:b]        |
| 34 | A01        | Ad01A8169   | 94  | 16 | 83  | 0  | 0  | 2  | 2.04  | 2  | -       | [a:h:b]        |
| 35 | A01        | AHGS1666    | 94  | 13 | 87  | 0  | 0  | 1  | 0.34  | 2  | -       | [a:h:b]        |
| 36 | A01        | AGGS1615    | 93  | 13 | 84  | 0  | 0  | 5  | 0.57  | 2  | -       | [a:h:b]        |
| 37 | A01        | AGGS1005    | 97  | 11 | 85  | 0  | 0  | 2  | 0.9   | 2  | -       | [a:h:b]        |
| 38 | A01        | AGGS2121    | 96  | 8  | 89  | 0  | 0  | 2  | 1.73  | 2  | -       | [a:h:b]        |
| 39 | A01        | AGGS0940    | 93  | 15 | 83  | 0  | 0  | 4  | 1.4   | 2  | -       | [a:h:b]        |
| 40 | A01        | AGGS2701    | 99  | 8  | 84  | 0  | 0  | 4  | 2.64  | 2  | -       | [a:h:b]        |
| 41 | A01        | AHGS1465    | 99  | 2  | 83  | 0  | 0  | 11 | 9.86  | 2  | ***     | [a:h:b]        |
| 42 | A01        | AGGS1885    | 0   | 0  | 95  | 0  | 96 | 4  | 0.63  | 1  | -       | [a+h+d:b]      |
| 43 | A01        | AHGS1459    | 99  | 0  | 95  | 0  | 0  | 1  | 13.02 | 2  | ****    | [a:h:b]        |
| 44 | A01        | Ad01A8152   | 97  | 2  | 95  | 0  | 0  | 1  | 9.04  | 2  | **      | [a:h:b]        |
| 45 | A01        | GM2807      | 105 | 0  | 81  | 0  | 0  | 9  | 15.7  | 2  | *****   | [a:h:b]        |
| 46 | A01        | AHGA284837  | 104 | 4  | 84  | 0  | 0  | 3  | 7.91  | 2  | **      | [a:h:b]        |
| 47 | A01        | pPGSSeq19C3 | 100 | 0  | 81  | 0  | 0  | 14 | 14.19 | 2  | *****   | [a:h:b]        |
| 48 | A01        | Ad05A18337  | 92  | 5  | 89  | 0  | 0  | 9  | 4.08  | 2  | -       | [a:h:b]        |
| 49 | A01        | AGGS0060    | 84  | 13 | 91  | 0  | 0  | 7  | 0.42  | 2  | -       | [a:h:b]        |
| 50 | A01        | Ai01B7542-2 | 94  | 0  | 101 | 0  | 0  | 0  | 13.27 | 2  | ****    | [a:h:b]        |
| 51 | A01        | AhTE0914    | 122 | 0  | 0   | 73 | 0  | 0  | 19.27 | 1  | *****   | [a:h+b+c]      |
| 52 | A01        | AHGS1846    | 89  | 11 | 86  | 0  | 0  | 9  | 0.09  | 2  | -       | [a:h:b]        |

| Nr  | Chromosome | Locus          | a   | h  | b   | c  | d | -  | X2    | Df | Signif. | Classification |
|-----|------------|----------------|-----|----|-----|----|---|----|-------|----|---------|----------------|
| 53  | A01        | AGGS0633       | 89  | 6  | 93  | 0  | 0 | 7  | 3.09  | 2  | -       | [a:h:b]        |
| 54  | A01        | TC4G05         | 95  | 10 | 83  | 0  | 0 | 7  | 1.1   | 2  | -       | [a:h:b]        |
| 55  | A01        | AhTE0635       | 77  | 12 | 96  | 0  | 0 | 10 | 2.1   | 2  | -       | [a:h:b]        |
| 56  | A01        | AGGS1979       | 106 | 1  | 86  | 0  | 0 | 2  | 13.03 | 2  | ****    | [a:h:b]        |
| 57  | A01        | AHGS0122       | 88  | 5  | 98  | 0  | 0 | 4  | 4.86  | 2  | *       | [a:h:b]        |
| 58  | A01        | AHGS1668       | 97  | 18 | 78  | 0  | 0 | 2  | 5.11  | 2  | *       | [a:h:b]        |
| 59  | A01        | TC23F04        | 93  | 3  | 96  | 0  | 0 | 3  | 7.25  | 2  | **      | [a:h:b]        |
| 60  | A01        | AHGS2559       | 97  | 7  | 88  | 0  | 0 | 3  | 2.67  | 2  | -       | [a:h:b]        |
| 61  | A01        | AHGS2429       | 98  | 13 | 82  | 0  | 0 | 2  | 1.49  | 2  | -       | [a:h:b]        |
| 62  | A01        | AHGS2084       | 95  | 9  | 86  | 0  | 0 | 5  | 1.2   | 2  | -       | [a:h:b]        |
| 63  | A01        | AHGS0201       | 112 | 0  | 83  | 0  | 0 | 0  | 17.6  | 2  | *****   | [a:h:b]        |
| 64  | A01        | AGGS1954       | 70  | 1  | 114 | 0  | 0 | 10 | 21.45 | 2  | *****   | [a:h:b]        |
| 65  | A01        | AHGS0729-3     | 106 | 4  | 81  | 0  | 0 | 4  | 9.12  | 2  | **      | [a:h:b]        |
| 66  | A01        | AGGS0694       | 88  | 2  | 104 | 0  | 0 | 1  | 10.43 | 2  | ***     | [a:h:b]        |
| 67  | A01        | AGGS1014       | 84  | 3  | 106 | 0  | 0 | 2  | 9.94  | 2  | ***     | [a:h:b]        |
| 68  | A01        | GM1839         | 81  | 4  | 95  | 0  | 0 | 15 | 6.15  | 2  | **      | [a:h:b]        |
| 69  | A01        | AhTE0986       | 130 | 0  | 0   | 64 | 0 | 1  | 31.58 | 1  | *****   | [a:h+b+c]      |
| 70  | A01        | pPGPseq3E5     | 92  | 9  | 86  | 0  | 0 | 8  | 0.86  | 2  | -       | [a:h:b]        |
| 71  | A02        | Ad02A16744     | 100 | 4  | 83  | 0  | 0 | 8  | 7.04  | 2  | **      | [a:h:b]        |
| 72  | A02        | Ad02A10600     | 105 | 0  | 88  | 0  | 0 | 2  | 14.46 | 2  | *****   | [a:h:b]        |
| 73  | A02        | Ad02A12962     | 107 | 9  | 71  | 0  | 0 | 8  | 8.05  | 2  | **      | [a:h:b]        |
| 74  | A02        | GNB218         | 103 | 11 | 79  | 0  | 0 | 2  | 3.28  | 2  | -       | [a:h:b]        |
| 75  | A02        | AHGS1987       | 102 | 12 | 80  | 0  | 0 | 1  | 2.66  | 2  | -       | [a:h:b]        |
| 76  | A02        | Ad02A4136      | 93  | 13 | 77  | 0  | 0 | 12 | 1.72  | 2  | -       | [a:h:b]        |
| 77  | A02        | Ai06B13545     | 103 | 14 | 77  | 0  | 0 | 1  | 4.03  | 2  | -       | [a:h:b]        |
| 78  | A02        | Ad02A4133      | 96  | 24 | 72  | 0  | 0 | 3  | 16    | 2  | *****   | [a:h:b]        |
| 79  | A02        | AGGS1635       | 111 | 2  | 80  | 0  | 0 | 2  | 14.26 | 2  | *****   | [a:h:b]        |
| 80  | A02        | pPGPseq1B9     | 106 | 0  | 77  | 0  | 0 | 12 | 17.1  | 2  | *****   | [a:h:b]        |
| 81  | A02        | AGGS1356       | 112 | 0  | 83  | 0  | 0 | 0  | 17.6  | 2  | *****   | [a:h:b]        |
| 82  | A03        | AHGS1855       | 99  | 9  | 86  | 0  | 0 | 1  | 1.79  | 2  | -       | [a:h:b]        |
| 83  | A03        | AHGS1674       | 133 | 12 | 50  | 0  | 0 | 0  | 37.69 | 2  | *****   | [a:h:b]        |
| 84  | A03        | AHGS1466       | 116 | 2  | 76  | 0  | 0 | 1  | 17.82 | 2  | *****   | [a:h:b]        |
| 85  | A03        | AHGS1338       | 111 | 7  | 73  | 0  | 0 | 4  | 10.24 | 2  | ***     | [a:h:b]        |
| 86  | A03        | AGGS1596       | 105 | 9  | 67  | 0  | 0 | 14 | 9.01  | 2  | **      | [a:h:b]        |
| 87  | A03        | AHGS1340       | 109 | 12 | 73  | 0  | 0 | 1  | 7.13  | 2  | **      | [a:h:b]        |
| 88  | A03        | Ad03A9257      | 114 | 4  | 75  | 0  | 0 | 2  | 14.15 | 2  | *****   | [a:h:b]        |
| 89  | A03        | AhTE0164       | 115 | 5  | 71  | 0  | 0 | 4  | 15.11 | 2  | *****   | [a:h:b]        |
| 90  | A03        | Ad06A5393      | 117 | 3  | 66  | 0  | 0 | 9  | 21.74 | 2  | *****   | [a:h:b]        |
| 91  | A03        | AHGS2005       | 98  | 1  | 87  | 0  | 0 | 9  | 11.05 | 2  | ****    | [a:h:b]        |
| 92  | A03        | AGGS1321       | 88  | 1  | 103 | 0  | 0 | 3  | 12.01 | 2  | ****    | [a:h:b]        |
| 93  | A03        | AHGA96466      | 93  | 10 | 76  | 0  | 0 | 16 | 1.86  | 2  | -       | [a:h:b]        |
| 94  | A03        | AHGA96458      | 93  | 12 | 89  | 0  | 0 | 1  | 0.09  | 2  | -       | [a:h:b]        |
| 95  | A03        | AHGA96464      | 89  | 12 | 93  | 0  | 0 | 1  | 0.09  | 2  | -       | [a:h:b]        |
| 96  | A03        | Ai05B9660      | 86  | 6  | 92  | 0  | 0 | 11 | 3.01  | 2  | -       | [a:h:b]        |
| 97  | A03        | Ai03B32338     | 83  | 4  | 90  | 0  | 0 | 18 | 5.1   | 2  | *       | [a:h:b]        |
| 98  | A04        | AGGS0396-1     | 101 | 6  | 76  | 0  | 0 | 12 | 6.4   | 2  | **      | [a:h:b]        |
| 99  | A04        | pPGSseq15C12-2 | 98  | 9  | 75  | 0  | 0 | 13 | 3.63  | 2  | -       | [a:h:b]        |
| 100 | A04        | Ad04A21094     | 97  | 10 | 82  | 0  | 0 | 6  | 1.57  | 2  | -       | [a:h:b]        |
| 101 | A04        | AGGS1211       | 95  | 15 | 82  | 0  | 0 | 3  | 1.74  | 2  | -       | [a:h:b]        |
| 102 | A04        | GM2313         | 98  | 6  | 82  | 0  | 0 | 9  | 4.37  | 2  | -       | [a:h:b]        |
| 103 | A04        | AhTE0422       | 100 | 13 | 78  | 0  | 0 | 4  | 2.8   | 2  | -       | [a:h:b]        |
| 104 | A05        | AGGS2387       | 104 | 4  | 83  | 0  | 0 | 4  | 8.09  | 2  | **      | [a:h:b]        |
| 105 | A05        | AGGS1589       | 106 | 3  | 86  | 0  | 0 | 0  | 9.58  | 2  | ***     | [a:h:b]        |

| Nr  | Chromosome | Locus        | a   | h  | b   | c   | d  | -  | X2    | Df | Signif. | Classification |
|-----|------------|--------------|-----|----|-----|-----|----|----|-------|----|---------|----------------|
| 106 | A05        | AHGS1143     | 12  | 0  | 173 | 0   | 0  | 10 | 161.8 | 2  | *****   | [a:h:b]        |
| 107 | A05        | Ai08B23999   | 104 | 19 | 70  | 0   | 0  | 2  | 10.64 | 2  | ****    | [a:h:b]        |
| 108 | A05        | Ad05A20734   | 109 | 0  | 76  | 0   | 0  | 10 | 18.61 | 2  | *****   | [a:h:b]        |
| 109 | A05        | Ai06B7451    | 85  | 14 | 88  | 0   | 0  | 8  | 0.54  | 2  | -       | [a:h:b]        |
| 110 | A05        | Ad05A19912   | 86  | 7  | 92  | 0   | 0  | 10 | 2.13  | 2  | -       | [a:h:b]        |
| 111 | A05        | Ad05A20509   | 88  | 8  | 91  | 0   | 0  | 8  | 1.29  | 2  | -       | [a:h:b]        |
| 112 | A05        | AGGS1233     | 85  | 5  | 95  | 0   | 0  | 10 | 4.55  | 2  | -       | [a:h:b]        |
| 113 | A05        | Ad05A20782   | 92  | 2  | 94  | 0   | 0  | 7  | 8.65  | 2  | **      | [a:h:b]        |
| 114 | A05        | Ad05A20533   | 91  | 4  | 90  | 0   | 0  | 10 | 5.28  | 2  | *       | [a:h:b]        |
| 115 | A05        | Ad05A20875   | 81  | 5  | 91  | 0   | 0  | 18 | 4.15  | 2  | -       | [a:h:b]        |
| 116 | A05        | Ad05A20801   | 87  | 10 | 90  | 0   | 0  | 8  | 0.31  | 2  | -       | [a:h:b]        |
| 117 | A05        | Ad05A20785   | 88  | 7  | 92  | 0   | 0  | 8  | 2.1   | 2  | -       | [a:h:b]        |
| 118 | A05        | Ad05A20677   | 90  | 6  | 83  | 0   | 0  | 16 | 2.86  | 2  | -       | [a:h:b]        |
| 119 | A05        | Ad05A20769   | 89  | 7  | 89  | 0   | 0  | 10 | 1.92  | 2  | -       | [a:h:b]        |
| 120 | A05        | Ad05A20650   | 88  | 9  | 85  | 0   | 0  | 13 | 0.58  | 2  | -       | [a:h:b]        |
| 121 | A05        | Ad05A20643-2 | 91  | 5  | 91  | 0   | 0  | 8  | 4.08  | 2  | -       | [a:h:b]        |
| 122 | A05        | Ad05A20570   | 91  | 6  | 89  | 0   | 0  | 9  | 2.93  | 2  | -       | [a:h:b]        |
| 123 | A05        | Ad05A20396   | 95  | 3  | 90  | 0   | 0  | 7  | 7.09  | 2  | **      | [a:h:b]        |
| 124 | A05        | Ad05A20499   | 83  | 3  | 98  | 0   | 0  | 11 | 8.01  | 2  | **      | [a:h:b]        |
| 125 | A05        | Ad05A20262   | 89  | 10 | 86  | 0   | 0  | 10 | 0.28  | 2  | -       | [a:h:b]        |
| 126 | A05        | Ad05A20012   | 92  | 1  | 91  | 0   | 0  | 11 | 10.23 | 2  | ***     | [a:h:b]        |
| 127 | A05        | Ad05A19999   | 91  | 5  | 89  | 0   | 0  | 10 | 4     | 2  | -       | [a:h:b]        |
| 128 | A05        | Ad05A20084   | 83  | 10 | 93  | 0   | 0  | 9  | 0.82  | 2  | -       | [a:h:b]        |
| 129 | A05        | Ad05A20046   | 80  | 7  | 100 | 0   | 0  | 8  | 4.29  | 2  | -       | [a:h:b]        |
| 130 | A05        | AGGS1542     | 87  | 2  | 105 | 0   | 0  | 1  | 10.8  | 2  | ****    | [a:h:b]        |
| 131 | A05        | Ad05A19382   | 79  | 11 | 96  | 0   | 0  | 9  | 1.69  | 2  | -       | [a:h:b]        |
| 132 | A05        | Ad05A19315   | 0   | 0  | 102 | 0   | 85 | 8  | 4.42  | 1  | **      | [a+h+d:b]      |
| 133 | A05        | Ad05A19473   | 77  | 0  | 0   | 108 | 0  | 10 | 2.05  | 1  | -       | [a:h+b+c]      |
| 134 | A05        | Ad05A19487   | 78  | 5  | 103 | 0   | 0  | 9  | 7.61  | 2  | **      | [a:h:b]        |
| 135 | A05        | Ad05A19295   | 77  | 13 | 95  | 0   | 0  | 10 | 2.06  | 2  | -       | [a:h:b]        |
| 136 | A05        | Ad05A19296   | 76  | 10 | 97  | 0   | 0  | 12 | 2.76  | 2  | -       | [a:h:b]        |
| 137 | A05        | Ad05A19142   | 79  | 5  | 100 | 0   | 0  | 11 | 6.48  | 2  | **      | [a:h:b]        |
| 138 | A05        | Ad05A19096   | 80  | 5  | 102 | 0   | 0  | 8  | 6.84  | 2  | **      | [a:h:b]        |
| 139 | A05        | Ad05A19116   | 73  | 13 | 99  | 0   | 0  | 10 | 4.09  | 2  | -       | [a:h:b]        |
| 140 | A05        | Ad05A19190   | 71  | 6  | 108 | 0   | 0  | 10 | 10.75 | 2  | ****    | [a:h:b]        |
| 141 | A05        | Ad05A19710   | 72  | 8  | 105 | 0   | 0  | 10 | 7.45  | 2  | **      | [a:h:b]        |
| 142 | A05        | Ad05A18820   | 67  | 15 | 102 | 0   | 0  | 11 | 8.24  | 2  | **      | [a:h:b]        |
| 143 | A05        | Ad05A18734   | 69  | 16 | 102 | 0   | 0  | 8  | 7.91  | 2  | **      | [a:h:b]        |
| 144 | A05        | Ad05A18845   | 77  | 1  | 108 | 0   | 0  | 9  | 15.87 | 2  | *****   | [a:h:b]        |
| 145 | A05        | AhTE0523     | 75  | 5  | 114 | 0   | 0  | 1  | 12.83 | 2  | ****    | [a:h:b]        |
| 146 | A05        | Ad05A18493   | 66  | 0  | 119 | 0   | 0  | 10 | 28.53 | 2  | *****   | [a:h:b]        |
| 147 | A05        | Ad05A18569   | 68  | 6  | 112 | 0   | 0  | 9  | 14.01 | 2  | *****   | [a:h:b]        |
| 148 | A05        | Ad05A18924   | 66  | 12 | 108 | 0   | 0  | 9  | 10.13 | 2  | ***     | [a:h:b]        |
| 149 | A05        | Ad05A18658   | 67  | 1  | 116 | 0   | 0  | 11 | 24.14 | 2  | *****   | [a:h:b]        |
| 150 | A05        | Ad05A19203   | 59  | 0  | 0   | 129 | 0  | 7  | 18.12 | 1  | *****   | [a:h+b+c]      |
| 151 | A05        | Ad05A18727   | 66  | 3  | 114 | 0   | 0  | 12 | 20.07 | 2  | *****   | [a:h:b]        |
| 152 | A05        | AhTE0470     | 70  | 4  | 120 | 0   | 0  | 1  | 19.55 | 2  | *****   | [a:h:b]        |
| 153 | A05        | Ad05A18501   | 0   | 0  | 107 | 0   | 80 | 8  | 8.04  | 1  | ****    | [a+h+d:b]      |
| 154 | A05        | Ad02A180     | 65  | 15 | 106 | 0   | 0  | 9  | 10.69 | 2  | ****    | [a:h:b]        |
| 155 | A05        | Ad05A18961   | 72  | 16 | 99  | 0   | 0  | 8  | 5.86  | 2  | *       | [a:h:b]        |
| 156 | A05        | Ad05A18695   | 70  | 11 | 105 | 0   | 0  | 9  | 7.06  | 2  | **      | [a:h:b]        |
| 157 | A05        | Ad02A182     | 63  | 5  | 123 | 0   | 0  | 4  | 24.41 | 2  | *****   | [a:h:b]        |
| 158 | A05        | Ad05A18275   | 72  | 9  | 107 | 0   | 0  | 7  | 7.64  | 2  | **      | [a:h:b]        |

| Nr  | Chromosome | Locus        | a   | h  | b   | c   | d | -  | X2    | Df | Signif. | Classification |
|-----|------------|--------------|-----|----|-----|-----|---|----|-------|----|---------|----------------|
| 159 | A05        | AhTE0278     | 52  | 10 | 129 | 0   | 0 | 4  | 33.45 | 2  | *****   | [a:h:b]        |
| 160 | A05        | Ad05A18425   | 62  | 34 | 89  | 0   | 0 | 10 | 50.65 | 2  | *****   | [a:h:b]        |
| 161 | A05        | Ad05A18453   | 74  | 12 | 99  | 0   | 0 | 10 | 3.62  | 2  | -       | [a:h:b]        |
| 162 | A05        | Ad05A17280   | 63  | 8  | 123 | 0   | 0 | 1  | 21.29 | 2  | *****   | [a:h:b]        |
| 163 | A05        | Ai06B29598   | 56  | 12 | 119 | 0   | 0 | 8  | 22.65 | 2  | *****   | [a:h:b]        |
| 164 | A05        | AGGS0738     | 91  | 1  | 97  | 0   | 0 | 6  | 10.76 | 2  | ****    | [a:h:b]        |
| 165 | A05        | Ad05A14690   | 85  | 7  | 102 | 0   | 0 | 1  | 3.9   | 2  | -       | [a:h:b]        |
| 166 | A05        | AhTE0820     | 82  | 0  | 0   | 113 | 0 | 0  | 1.82  | 1  | -       | [a:h+b+c]      |
| 167 | A05        | AHGS1813     | 18  | 4  | 170 | 0   | 0 | 3  | 134   | 2  | *****   | [a:h:b]        |
| 168 | A05        | AGGS1518     | 87  | 14 | 77  | 0   | 0 | 17 | 1.39  | 2  | -       | [a:h:b]        |
| 169 | A05        | AHGS2644     | 70  | 7  | 109 | 0   | 0 | 9  | 10.69 | 2  | ****    | [a:h:b]        |
| 170 | A05        | AhTE0005     | 69  | 9  | 109 | 0   | 0 | 8  | 9.79  | 2  | ***     | [a:h:b]        |
| 171 | A05        | AHGS1245     | 72  | 10 | 100 | 0   | 0 | 13 | 4.77  | 2  | *       | [a:h:b]        |
| 172 | A05        | GM630        | 69  | 11 | 97  | 0   | 0 | 18 | 4.73  | 2  | *       | [a:h:b]        |
| 173 | A05        | AHGS2159     | 71  | 9  | 110 | 0   | 0 | 5  | 9.28  | 2  | ***     | [a:h:b]        |
| 174 | A05        | Ad05A20222   | 18  | 3  | 164 | 0   | 0 | 10 | 129.7 | 2  | *****   | [a:h:b]        |
| 175 | A05        | AGGS2124     | 76  | 4  | 103 | 0   | 0 | 12 | 9.41  | 2  | ***     | [a:h:b]        |
| 176 | A05        | Ah426        | 77  | 5  | 103 | 0   | 0 | 10 | 7.87  | 2  | **      | [a:h:b]        |
| 177 | A05        | Ad05A10356   | 73  | 9  | 109 | 0   | 0 | 4  | 8.01  | 2  | **      | [a:h:b]        |
| 178 | A05        | AGGS2746     | 77  | 10 | 108 | 0   | 0 | 0  | 5.68  | 2  | *       | [a:h:b]        |
| 179 | A05        | Ai07B23662-1 | 78  | 5  | 110 | 0   | 0 | 2  | 10.07 | 2  | ***     | [a:h:b]        |
| 180 | A05        | AGGS1656     | 72  | 1  | 112 | 0   | 0 | 10 | 19.52 | 2  | *****   | [a:h:b]        |
| 181 | A05        | ARS702       | 77  | 3  | 108 | 0   | 0 | 7  | 12.4  | 2  | ****    | [a:h:b]        |
| 182 | A05        | AHGS1440-2   | 71  | 13 | 101 | 0   | 0 | 10 | 5.38  | 2  | *       | [a:h:b]        |
| 183 | A05        | AHGS1850     | 73  | 6  | 102 | 0   | 0 | 14 | 7.62  | 2  | **      | [a:h:b]        |
| 184 | A05        | AGGS2177     | 83  | 8  | 96  | 0   | 0 | 8  | 2.2   | 2  | -       | [a:h:b]        |
| 185 | A05        | Ad05A5618    | 80  | 10 | 103 | 0   | 0 | 2  | 3.3   | 2  | -       | [a:h:b]        |
| 186 | A05        | ARS715       | 80  | 10 | 96  | 0   | 0 | 9  | 1.71  | 2  | -       | [a:h:b]        |
| 187 | A05        | Ad05A19823   | 91  | 7  | 89  | 0   | 0 | 8  | 2.03  | 2  | -       | [a:h:b]        |
| 188 | A05        | AhTE0148     | 90  | 12 | 86  | 0   | 0 | 7  | 0.1   | 2  | -       | [a:h:b]        |
| 189 | A05        | AGGS1403     | 93  | 4  | 97  | 0   | 0 | 1  | 5.9   | 2  | *       | [a:h:b]        |
| 190 | A05        | AHGS2534     | 96  | 11 | 86  | 0   | 0 | 2  | 0.65  | 2  | -       | [a:h:b]        |
| 191 | A05        | AHGA44674    | 87  | 10 | 83  | 0   | 0 | 15 | 0.24  | 2  | -       | [a:h:b]        |
| 192 | A05        | PM65         | 100 | 1  | 83  | 0   | 0 | 11 | 11.9  | 2  | ****    | [a:h:b]        |
| 193 | A05        | GNB138       | 85  | 3  | 98  | 0   | 0 | 9  | 7.79  | 2  | **      | [a:h:b]        |
| 194 | A05        | AhTE0553-1   | 87  | 0  | 0   | 101 | 0 | 7  | 0.03  | 1  | -       | [a:h+b+c]      |
| 195 | A05        | pPGPSeq2F10  | 82  | 0  | 110 | 0   | 0 | 3  | 17.16 | 2  | *****   | [a:h:b]        |
| 196 | A05        | AGGS1167     | 89  | 8  | 96  | 0   | 0 | 2  | 1.73  | 2  | -       | [a:h:b]        |
| 197 | A05        | AGGS1187     | 87  | 10 | 94  | 0   | 0 | 4  | 0.61  | 2  | -       | [a:h:b]        |
| 198 | A05        | AHGS1806     | 93  | 7  | 90  | 0   | 0 | 5  | 2.19  | 2  | -       | [a:h:b]        |
| 199 | A05        | Ad05A8309    | 85  | 6  | 101 | 0   | 0 | 3  | 4.62  | 2  | *       | [a:h:b]        |
| 200 | A05        | AhTE0540     | 88  | 0  | 0   | 107 | 0 | 0  | 0.24  | 1  | -       | [a:h+b+c]      |
| 201 | A05        | AGGS0346     | 102 | 0  | 81  | 0   | 0 | 12 | 14.77 | 2  | *****   | [a:h:b]        |
| 202 | A05        | AGGS2187     | 83  | 10 | 97  | 0   | 0 | 5  | 1.42  | 2  | -       | [a:h:b]        |
| 203 | A05        | AGGS1700     | 86  | 10 | 96  | 0   | 0 | 3  | 0.91  | 2  | -       | [a:h:b]        |
| 204 | A05        | Ad05A20617   | 102 | 0  | 84  | 0   | 0 | 9  | 14.26 | 2  | *****   | [a:h:b]        |
| 205 | A05        | AGGS2372     | 107 | 0  | 83  | 0   | 0 | 5  | 15.9  | 2  | *****   | [a:h:b]        |
| 206 | A05        | AhTE0810     | 121 | 0  | 0   | 73  | 0 | 1  | 18.71 | 1  | *****   | [a:h+b+c]      |
| 207 | A05        | AC1D11       | 99  | 0  | 82  | 0   | 0 | 14 | 13.77 | 2  | ****    | [a:h:b]        |
| 208 | A05        | AT43         | 101 | 8  | 83  | 0   | 0 | 3  | 3.22  | 2  | -       | [a:h:b]        |
| 209 | A05        | AHGS1507     | 103 | 9  | 80  | 0   | 0 | 3  | 3.74  | 2  | -       | [a:h:b]        |
| 210 | A05        | AhTE0839     | 117 | 0  | 0   | 78  | 0 | 0  | 13.49 | 1  | *****   | [a:h+b+c]      |
| 211 | A05        | PM36-2       | 93  | 3  | 92  | 0   | 0 | 7  | 6.96  | 2  | **      | [a:h:b]        |

| Nr  | Chromosome | Locus      | a   | h  | b  | c  | d   | -  | X2    | Df | Signif. | Classification |
|-----|------------|------------|-----|----|----|----|-----|----|-------|----|---------|----------------|
| 212 | A05        | AhTE0711   | 112 | 0  | 0  | 81 | 0   | 2  | 9.65  | 1  | ****    | [a:h+b+c]      |
| 213 | A05        | AGGS1629   | 111 | 5  | 61 | 0  | 0   | 18 | 18.61 | 2  | *****   | [a:h:b]        |
| 214 | A06        | AT68       | 113 | 0  | 77 | 0  | 0   | 5  | 19.94 | 2  | *****   | [a:h:b]        |
| 215 | A06        | AGGS0978   | 105 | 0  | 88 | 0  | 0   | 2  | 14.46 | 2  | *****   | [a:h:b]        |
| 216 | A06        | Ai06B19288 | 102 | 11 | 70 | 0  | 0   | 12 | 5.99  | 2  | *       | [a:h:b]        |
| 217 | A06        | TC7C06     | 100 | 7  | 80 | 0  | 0   | 8  | 4.29  | 2  | -       | [a:h:b]        |
| 218 | A06        | AGGS0720   | 113 | 1  | 74 | 0  | 0   | 7  | 19.12 | 2  | *****   | [a:h:b]        |
| 219 | A06        | AGGS750    | 110 | 2  | 70 | 0  | 0   | 13 | 17.62 | 2  | *****   | [a:h:b]        |
| 220 | A06        | AHGS0153   | 119 | 0  | 75 | 0  | 0   | 1  | 23.58 | 2  | *****   | [a:h:b]        |
| 221 | A06        | AGGS1479   | 117 | 2  | 70 | 0  | 0   | 6  | 21.16 | 2  | *****   | [a:h:b]        |
| 222 | A06        | TC9C06     | 114 | 2  | 70 | 0  | 0   | 9  | 19.6  | 2  | *****   | [a:h:b]        |
| 223 | A06        | Ad06A10649 | 111 | 0  | 82 | 0  | 0   | 2  | 17.51 | 2  | *****   | [a:h:b]        |
| 224 | A06        | GNB87      | 108 | 5  | 79 | 0  | 0   | 3  | 9.03  | 2  | **      | [a:h:b]        |
| 225 | A06        | AGGS2082   | 111 | 9  | 68 | 0  | 0   | 7  | 11.18 | 2  | ****    | [a:h:b]        |
| 226 | A06        | AGGS1953   | 107 | 9  | 69 | 0  | 0   | 10 | 8.93  | 2  | **      | [a:h:b]        |
| 227 | A06        | AHGA193642 | 108 | 10 | 66 | 0  | 0   | 11 | 10.43 | 2  | ***     | [a:h:b]        |
| 228 | A06        | AGGS1450   | 108 | 6  | 63 | 0  | 0   | 18 | 14.67 | 2  | *****   | [a:h:b]        |
| 229 | A06        | GNB877     | 116 | 6  | 65 | 0  | 0   | 8  | 17.79 | 2  | *****   | [a:h:b]        |
| 230 | A06        | GNB329     | 118 | 7  | 69 | 0  | 0   | 1  | 15.51 | 2  | *****   | [a:h:b]        |
| 231 | A06        | GNB1040-1  | 113 | 6  | 69 | 0  | 0   | 7  | 13.99 | 2  | *****   | [a:h:b]        |
| 232 | A06        | EE51       | 120 | 0  | 0  | 67 | 0   | 8  | 22.46 | 1  | *****   | [a:h+b+c]      |
| 233 | A06        | AGGS1773   | 119 | 0  | 76 | 0  | 0   | 0  | 23.11 | 2  | *****   | [a:h:b]        |
| 234 | A06        | AGGS1932   | 110 | 7  | 73 | 0  | 0   | 5  | 9.82  | 2  | ***     | [a:h:b]        |
| 235 | A06        | TC1A02     | 113 | 10 | 69 | 0  | 0   | 3  | 11.11 | 2  | ****    | [a:h:b]        |
| 236 | A06        | TC11A04    | 109 | 11 | 68 | 0  | 0   | 7  | 9.59  | 2  | ***     | [a:h:b]        |
| 237 | A06        | Ad06A16982 | 119 | 3  | 69 | 0  | 0   | 4  | 21.1  | 2  | *****   | [a:h:b]        |
| 238 | A06        | Ad06A17247 | 116 | 5  | 70 | 0  | 0   | 4  | 16.12 | 2  | *****   | [a:h:b]        |
| 239 | A06        | PM377      | 115 | 7  | 65 | 0  | 0   | 8  | 16.27 | 2  | *****   | [a:h:b]        |
| 240 | A07        | AGGS1365   | 109 | 9  | 73 | 0  | 0   | 4  | 8.01  | 2  | **      | [a:h:b]        |
| 241 | A07        | AhTE0478   | 128 | 1  | 66 | 0  | 0   | 0  | 31.98 | 2  | *****   | [a:h:b]        |
| 242 | A07        | AHGA102053 | 117 | 10 | 58 | 0  | 0   | 10 | 20.3  | 2  | *****   | [a:h:b]        |
| 243 | A07        | AHGS1296   | 118 | 7  | 68 | 0  | 0   | 2  | 16.08 | 2  | *****   | [a:h:b]        |
| 244 | A07        | AGGS2556   | 110 | 6  | 75 | 0  | 0   | 4  | 9.99  | 2  | ***     | [a:h:b]        |
| 245 | A07        | Ad06A4196  | 113 | 3  | 79 | 0  | 0   | 0  | 13.71 | 2  | ****    | [a:h:b]        |
| 246 | A07        | IPAHM123   | 113 | 0  | 82 | 0  | 0   | 0  | 18.26 | 2  | *****   | [a:h:b]        |
| 247 | A07        | TC9H08     | 106 | 2  | 86 | 0  | 0   | 1  | 11.22 | 2  | ****    | [a:h:b]        |
| 248 | A07        | Ad07A4990  | 108 | 9  | 74 | 0  | 0   | 4  | 7.23  | 2  | **      | [a:h:b]        |
| 249 | A07        | PM204      | 108 | 6  | 72 | 0  | 0   | 9  | 10.34 | 2  | ***     | [a:h:b]        |
| 250 | A07        | GM1937     | 106 | 5  | 75 | 0  | 0   | 9  | 9.54  | 2  | ***     | [a:h:b]        |
| 251 | A07        | Ad07A9745  | 105 | 9  | 73 | 0  | 0   | 8  | 6.5   | 2  | **      | [a:h:b]        |
| 252 | A07        | AHGS2153   | 107 | 11 | 75 | 0  | 0   | 2  | 5.76  | 2  | *       | [a:h:b]        |
| 253 | A07        | AGGS1389   | 108 | 10 | 75 | 0  | 0   | 2  | 6.39  | 2  | **      | [a:h:b]        |
| 254 | A07        | AHGS1475   | 110 | 11 | 72 | 0  | 0   | 2  | 8.08  | 2  | **      | [a:h:b]        |
| 255 | A07        | AGGS1987   | 104 | 12 | 73 | 0  | 0   | 6  | 5.43  | 2  | *       | [a:h:b]        |
| 256 | A07        | AHGS1980   | 107 | 12 | 75 | 0  | 0   | 1  | 5.63  | 2  | *       | [a:h:b]        |
| 257 | A07        | AHGS1954   | 107 | 11 | 73 | 0  | 0   | 4  | 6.53  | 2  | **      | [a:h:b]        |
| 258 | A07        | AGGS1568   | 105 | 7  | 77 | 0  | 0   | 6  | 6.52  | 2  | **      | [a:h:b]        |
| 259 | A07        | AHGS1692   | 116 | 4  | 74 | 0  | 0   | 1  | 15.51 | 2  | *****   | [a:h:b]        |
| 260 | A07        | AHGA65328  | 109 | 10 | 73 | 0  | 0   | 3  | 7.56  | 2  | **      | [a:h:b]        |
| 261 | A07        | AGGS1638   | 108 | 4  | 75 | 0  | 0   | 8  | 11.61 | 2  | ****    | [a:h:b]        |
| 262 | A07        | AGGS0187   | 103 | 10 | 80 | 0  | 0   | 2  | 3.3   | 2  | -       | [a:h:b]        |
| 263 | A07        | AHGS2413   | 105 | 12 | 76 | 0  | 0   | 2  | 4.65  | 2  | *       | [a:h:b]        |
| 264 | A07        | AhTE0706   | 0   | 0  | 86 | 0  | 109 | 0  | 0.6   | 1  | -       | [a+h+d:b]      |

| Nr  | Chromosome | Locus      | a   | h  | b  | c  | d   | -  | X2    | Df | Signif. | Classification |
|-----|------------|------------|-----|----|----|----|-----|----|-------|----|---------|----------------|
| 265 | A07        | AHGS1189   | 107 | 5  | 78 | 0  | 0   | 5  | 8.97  | 2  | **      | [a:h:b]        |
| 266 | A07        | TC41A10    | 105 | 11 | 75 | 0  | 0   | 4  | 5.1   | 2  | *       | [a:h:b]        |
| 267 | A07        | AGGS1662   | 102 | 6  | 82 | 0  | 0   | 5  | 5.35  | 2  | *       | [a:h:b]        |
| 268 | A07        | AHGS0346   | 103 | 12 | 80 | 0  | 0   | 0  | 2.9   | 2  | -       | [a:h:b]        |
| 269 | A07        | AHGS0147   | 101 | 4  | 85 | 0  | 0   | 5  | 7.01  | 2  | **      | [a:h:b]        |
| 270 | A07        | AHGS1266   | 102 | 12 | 78 | 0  | 0   | 3  | 3.2   | 2  | -       | [a:h:b]        |
| 271 | A07        | AGGS1585   | 100 | 8  | 82 | 0  | 0   | 5  | 3.17  | 2  | -       | [a:h:b]        |
| 272 | A07        | AHGS2754   | 106 | 6  | 79 | 0  | 0   | 4  | 7.22  | 2  | **      | [a:h:b]        |
| 273 | A07        | AHGS1913   | 105 | 9  | 80 | 0  | 0   | 1  | 4.3   | 2  | -       | [a:h:b]        |
| 274 | A07        | AGGS2061   | 104 | 5  | 86 | 0  | 0   | 0  | 6.29  | 2  | **      | [a:h:b]        |
| 275 | A07        | Ad04A10156 | 90  | 8  | 86 | 0  | 0   | 11 | 1.23  | 2  | -       | [a:h:b]        |
| 276 | A07        | AGGS1577   | 115 | 2  | 76 | 0  | 0   | 2  | 17.36 | 2  | *****   | [a:h:b]        |
| 277 | A07        | AHGS0274   | 104 | 10 | 81 | 0  | 0   | 0  | 3.31  | 2  | -       | [a:h:b]        |
| 278 | A07        | AGGS2261   | 101 | 8  | 76 | 0  | 0   | 10 | 4.77  | 2  | *       | [a:h:b]        |
| 279 | A08        | AGGS0337   | 113 | 4  | 77 | 0  | 0   | 1  | 12.93 | 2  | ****    | [a:h:b]        |
| 280 | A08        | AGGS1466   | 95  | 15 | 75 | 0  | 0   | 10 | 3.4   | 2  | -       | [a:h:b]        |
| 281 | A08        | AHGS1574   | 95  | 17 | 80 | 0  | 0   | 3  | 3.47  | 2  | -       | [a:h:b]        |
| 282 | A08        | Ai07B26726 | 98  | 10 | 84 | 0  | 0   | 3  | 1.44  | 2  | -       | [a:h:b]        |
| 283 | A08        | Ad08A3453  | 108 | 8  | 78 | 0  | 0   | 1  | 6.45  | 2  | **      | [a:h:b]        |
| 284 | A08        | AhTE0690   | 0   | 0  | 93 | 0  | 102 | 0  | 0.05  | 1  | -       | [a+h+d:b]      |
| 285 | A08        | AHGS2319   | 107 | 1  | 86 | 0  | 0   | 1  | 13.31 | 2  | ****    | [a:h:b]        |
| 286 | A08        | Ad08A4387  | 99  | 7  | 81 | 0  | 0   | 8  | 3.85  | 2  | -       | [a:h:b]        |
| 287 | A08        | AGGS2027   | 95  | 10 | 80 | 0  | 0   | 10 | 1.52  | 2  | -       | [a:h:b]        |
| 288 | A08        | AHGS1434   | 102 | 15 | 78 | 0  | 0   | 0  | 3.84  | 2  | -       | [a:h:b]        |
| 289 | A08        | AGGS1495   | 101 | 10 | 82 | 0  | 0   | 2  | 2.37  | 2  | -       | [a:h:b]        |
| 290 | A08        | GM1713     | 93  | 15 | 72 | 0  | 0   | 15 | 3.95  | 2  | -       | [a:h:b]        |
| 291 | A08        | Ad08A4940  | 106 | 7  | 82 | 0  | 0   | 0  | 5.51  | 2  | *       | [a:h:b]        |
| 292 | A08        | AHGS1687   | 103 | 12 | 77 | 0  | 0   | 3  | 3.76  | 2  | -       | [a:h:b]        |
| 293 | A08        | pPGPseq2G3 | 99  | 14 | 72 | 0  | 0   | 10 | 4.75  | 2  | *       | [a:h:b]        |
| 294 | A08        | AHGA361225 | 102 | 0  | 88 | 0  | 0   | 5  | 13.77 | 2  | ****    | [a:h:b]        |
| 295 | A08        | GM1901     | 91  | 21 | 73 | 0  | 0   | 10 | 10.08 | 2  | ***     | [a:h:b]        |
| 296 | A09        | AHTE0840   | 114 | 0  | 0  | 81 | 0   | 0  | 10.51 | 1  | ****    | [a:h+b+c]      |
| 297 | A09        | AGGS2745   | 118 | 1  | 69 | 0  | 0   | 7  | 24.11 | 2  | *****   | [a:h:b]        |
| 298 | A09        | AGGS2744   | 112 | 0  | 72 | 0  | 0   | 11 | 21.54 | 2  | *****   | [a:h:b]        |
| 299 | A09        | AGGS1003   | 108 | 5  | 80 | 0  | 0   | 2  | 8.74  | 2  | **      | [a:h:b]        |
| 300 | A09        | AGGS1925   | 97  | 7  | 88 | 0  | 0   | 3  | 2.67  | 2  | -       | [a:h:b]        |
| 301 | A09        | AHGS1208   | 106 | 0  | 86 | 0  | 0   | 3  | 15.02 | 2  | *****   | [a:h:b]        |
| 302 | A09        | AGGS1432   | 98  | 9  | 79 | 0  | 0   | 9  | 2.7   | 2  | -       | [a:h:b]        |
| 303 | A09        | GNB159     | 112 | 0  | 74 | 0  | 0   | 9  | 20.68 | 2  | *****   | [a:h:b]        |
| 304 | A09        | AGGS0385   | 114 | 5  | 75 | 0  | 0   | 1  | 12.83 | 2  | ****    | [a:h:b]        |
| 305 | A09        | AHGS0422   | 118 | 2  | 75 | 0  | 0   | 0  | 19.2  | 2  | *****   | [a:h:b]        |
| 306 | A09        | AhTE0808   | 123 | 0  | 0  | 72 | 0   | 0  | 20.56 | 1  | *****   | [a:h+b+c]      |
| 307 | A09        | AGGS1498   | 114 | 1  | 75 | 0  | 0   | 5  | 19.16 | 2  | *****   | [a:h:b]        |
| 308 | A09        | AGGS1137   | 110 | 4  | 73 | 0  | 0   | 8  | 13.2  | 2  | ****    | [a:h:b]        |
| 309 | A09        | AGGS1317   | 108 | 6  | 71 | 0  | 0   | 10 | 10.75 | 2  | ****    | [a:h:b]        |
| 310 | A09        | AGGS1193   | 107 | 9  | 74 | 0  | 0   | 5  | 6.86  | 2  | **      | [a:h:b]        |
| 311 | A09        | GM2839     | 109 | 10 | 73 | 0  | 0   | 3  | 7.56  | 2  | **      | [a:h:b]        |
| 312 | A09        | EM87       | 101 | 11 | 77 | 0  | 0   | 6  | 3.31  | 2  | -       | [a:h:b]        |
| 313 | A09        | AhTE0726   | 113 | 0  | 0  | 82 | 0   | 0  | 9.6   | 1  | ****    | [a:h+b+c]      |
| 314 | A09        | AHGS0400   | 109 | 1  | 84 | 0  | 0   | 1  | 14.32 | 2  | *****   | [a:h:b]        |
| 315 | A09        | AGGS1438   | 111 | 5  | 78 | 0  | 0   | 1  | 10.45 | 2  | ***     | [a:h:b]        |
| 316 | A09        | AHGS1319   | 102 | 10 | 78 | 0  | 0   | 5  | 3.55  | 2  | -       | [a:h:b]        |
| 317 | A09        | AGGS2134   | 99  | 13 | 64 | 0  | 0   | 19 | 7.81  | 2  | **      | [a:h:b]        |

| Nr  | Chromosome | Locus      | a   | h  | b  | c  | d   | -  | X2    | Df | Signif. | Classification |
|-----|------------|------------|-----|----|----|----|-----|----|-------|----|---------|----------------|
| 318 | A09        | Ad09A10442 | 102 | 12 | 74 | 0  | 0   | 7  | 4.45  | 2  | -       | [a:h:b]        |
| 319 | A09        | AHGS1543   | 101 | 14 | 79 | 0  | 0   | 1  | 2.97  | 2  | -       | [a:h:b]        |
| 320 | A09        | AHGS1126   | 104 | 10 | 81 | 0  | 0   | 0  | 3.31  | 2  | -       | [a:h:b]        |
| 321 | A09        | Ad09A5979  | 102 | 11 | 79 | 0  | 0   | 3  | 3.03  | 2  | -       | [a:h:b]        |
| 322 | A09        | Ad09A6009  | 99  | 12 | 82 | 0  | 0   | 2  | 1.6   | 2  | -       | [a:h:b]        |
| 323 | A09        | Ad09A6680  | 99  | 13 | 72 | 0  | 0   | 11 | 4.43  | 2  | -       | [a:h:b]        |
| 324 | A09        | AhTE0303   | 97  | 13 | 83 | 0  | 0   | 2  | 1.16  | 2  | -       | [a:h:b]        |
| 325 | A09        | Ad09A6617  | 101 | 11 | 80 | 0  | 0   | 3  | 2.54  | 2  | -       | [a:h:b]        |
| 326 | A09        | Ad09A6594  | 97  | 11 | 80 | 0  | 0   | 7  | 1.69  | 2  | -       | [a:h:b]        |
| 327 | A09        | Ad09A7483  | 98  | 10 | 76 | 0  | 0   | 11 | 3.01  | 2  | -       | [a:h:b]        |
| 328 | A09        | Ad09A7532  | 97  | 9  | 76 | 0  | 0   | 13 | 3.11  | 2  | -       | [a:h:b]        |
| 329 | A09        | GNB136     | 101 | 10 | 82 | 0  | 0   | 2  | 2.37  | 2  | -       | [a:h:b]        |
| 330 | A09        | Ad09A6154  | 98  | 12 | 81 | 0  | 0   | 4  | 1.61  | 2  | -       | [a:h:b]        |
| 331 | A09        | Ad09A7328  | 102 | 9  | 76 | 0  | 0   | 8  | 4.52  | 2  | -       | [a:h:b]        |
| 332 | A09        | Ad09A6072  | 92  | 8  | 83 | 0  | 0   | 12 | 1.57  | 2  | -       | [a:h:b]        |
| 333 | A09        | AHGA7048   | 103 | 6  | 85 | 0  | 0   | 1  | 5.08  | 2  | *       | [a:h:b]        |
| 334 | A09        | Ad09A6233  | 95  | 6  | 76 | 0  | 0   | 18 | 4.65  | 2  | *       | [a:h:b]        |
| 335 | A09        | AGGS1378   | 102 | 4  | 86 | 0  | 0   | 3  | 7.11  | 2  | **      | [a:h:b]        |
| 336 | A09        | AGGS0449   | 112 | 4  | 76 | 0  | 0   | 3  | 12.89 | 2  | ****    | [a:h:b]        |
| 337 | A09        | AHGA98575  | 101 | 3  | 88 | 0  | 0   | 3  | 8.14  | 2  | **      | [a:h:b]        |
| 338 | A09        | AGGS0957   | 96  | 6  | 90 | 0  | 0   | 3  | 3.4   | 2  | -       | [a:h:b]        |
| 339 | A09        | Ad09A7577  | 103 | 9  | 81 | 0  | 0   | 2  | 3.5   | 2  | -       | [a:h:b]        |
| 340 | A09        | AGGS1606   | 101 | 0  | 92 | 0  | 0   | 2  | 13.31 | 2  | ****    | [a:h:b]        |
| 341 | A09        | AHGA98567  | 98  | 0  | 84 | 0  | 0   | 13 | 13.28 | 2  | ****    | [a:h:b]        |
| 342 | A09        | Ad91I24    | 106 | 0  | 89 | 0  | 0   | 0  | 14.58 | 2  | *****   | [a:h:b]        |
| 343 | A09        | AHGS2130   | 102 | 0  | 92 | 0  | 0   | 1  | 13.48 | 2  | ****    | [a:h:b]        |
| 344 | A09        | AGGS2492   | 110 | 5  | 77 | 0  | 0   | 3  | 10.41 | 2  | ***     | [a:h:b]        |
| 345 | A09        | GNB652     | 109 | 2  | 80 | 0  | 0   | 4  | 13.52 | 2  | ****    | [a:h:b]        |
| 346 | A09        | AHGS1683   | 97  | 10 | 87 | 0  | 0   | 1  | 0.95  | 2  | -       | [a:h:b]        |
| 347 | A09        | Ad09A6425  | 101 | 11 | 82 | 0  | 0   | 1  | 2.1   | 2  | -       | [a:h:b]        |
| 348 | A09        | AGGS0389   | 103 | 3  | 80 | 0  | 0   | 9  | 9.86  | 2  | ***     | [a:h:b]        |
| 349 | A09        | AHGS1283   | 99  | 13 | 81 | 0  | 0   | 2  | 1.87  | 2  | -       | [a:h:b]        |
| 350 | A09        | AGGS2572   | 103 | 7  | 83 | 0  | 0   | 2  | 4.48  | 2  | -       | [a:h:b]        |
| 351 | A09        | AGGS0977   | 103 | 0  | 91 | 0  | 0   | 1  | 13.73 | 2  | ****    | [a:h:b]        |
| 352 | A09        | AGGS0285   | 101 | 11 | 83 | 0  | 0   | 0  | 1.9   | 2  | -       | [a:h:b]        |
| 353 | A09        | Ad09A3779  | 102 | 10 | 80 | 0  | 0   | 3  | 3.04  | 2  | -       | [a:h:b]        |
| 354 | A09        | GNB377     | 102 | 0  | 91 | 0  | 0   | 2  | 13.54 | 2  | ****    | [a:h:b]        |
| 355 | A09        | AGGS2438   | 95  | 4  | 92 | 0  | 0   | 4  | 5.68  | 2  | *       | [a:h:b]        |
| 356 | A09        | AhTE0283   | 107 | 2  | 86 | 0  | 0   | 0  | 11.5  | 2  | ****    | [a:h:b]        |
| 357 | A09        | ARS742     | 93  | 5  | 79 | 0  | 0   | 18 | 4.73  | 2  | *       | [a:h:b]        |
| 358 | A09        | AHGS0344   | 100 | 6  | 86 | 0  | 0   | 3  | 4.29  | 2  | -       | [a:h:b]        |
| 359 | A09        | Ad10A10685 | 108 | 6  | 79 | 0  | 0   | 2  | 7.9   | 2  | **      | [a:h:b]        |
| 360 | A09        | AhTE0922   | 0   | 0  | 82 | 0  | 113 | 0  | 1.82  | 1  | -       | [a+h+d:b]      |
| 361 | A09        | AhTE0794   | 0   | 0  | 92 | 0  | 101 | 2  | 0.05  | 1  | -       | [a+h+d:b]      |
| 362 | A09        | AhTE0381   | 109 | 0  | 85 | 0  | 0   | 1  | 16.1  | 2  | *****   | [a:h:b]        |
| 363 | A09        | AGGS2380   | 101 | 11 | 75 | 0  | 0   | 8  | 3.9   | 2  | -       | [a:h:b]        |
| 364 | A09        | AhTE0888   | 132 | 0  | 0  | 63 | 0   | 0  | 33.93 | 1  | *****   | [a:h+b+c]      |
| 365 | A09        | AhTE0707   | 124 | 0  | 0  | 71 | 0   | 0  | 21.88 | 1  | *****   | [a:h+b+c]      |
| 366 | A09        | AhTE0815   | 109 | 0  | 0  | 73 | 0   | 13 | 12.38 | 1  | *****   | [a:h+b+c]      |
| 367 | A09        | AhTE0532   | 105 | 2  | 81 | 0  | 0   | 7  | 11.9  | 2  | ****    | [a:h:b]        |
| 368 | A09        | AGGS0100   | 105 | 20 | 69 | 0  | 0   | 1  | 12.58 | 2  | ****    | [a:h:b]        |
| 369 | A10        | AhTE0524   | 98  | 0  | 97 | 0  | 0   | 0  | 13.01 | 2  | ****    | [a:h:b]        |
| 370 | A10        | AGGS1283   | 97  | 3  | 94 | 0  | 0   | 1  | 7.37  | 2  | **      | [a:h:b]        |

| Nr  | Chromosome | Locus        | a   | h  | b  | c   | d   | -  | X2    | Df | Signif. | Classification |
|-----|------------|--------------|-----|----|----|-----|-----|----|-------|----|---------|----------------|
| 371 | A10        | AhTE0797     | 100 | 0  | 0  | 95  | 0   | 0  | 1.52  | 1  | -       | [a:h+b+c]      |
| 372 | B01        | GA1          | 83  | 20 | 76 | 0   | 0   | 16 | 7.7   | 2  | **      | [a:h:b]        |
| 373 | B01        | AHGS1098     | 100 | 8  | 82 | 0   | 0   | 5  | 3.17  | 2  | -       | [a:h:b]        |
| 374 | B01        | AGGS2325     | 0   | 0  | 76 | 0   | 112 | 7  | 3.14  | 1  | *       | [a+h+d:b]      |
| 375 | B01        | AHGS0108     | 94  | 9  | 83 | 0   | 0   | 9  | 1.33  | 2  | -       | [a:h:b]        |
| 376 | B01        | AHTE0845     | 122 | 0  | 0  | 73  | 0   | 0  | 19.27 | 1  | *****   | [a:h+b+c]      |
| 377 | B01        | AGGS0281     | 99  | 5  | 89 | 0   | 0   | 2  | 4.96  | 2  | *       | [a:h:b]        |
| 378 | B01        | Ad05A20112   | 87  | 11 | 82 | 0   | 0   | 15 | 0.15  | 2  | -       | [a:h:b]        |
| 379 | B01        | Ai07B23662-2 | 112 | 5  | 70 | 0   | 0   | 8  | 14.14 | 2  | *****   | [a:h:b]        |
| 380 | B01        | AHTE0674     | 102 | 0  | 93 | 0   | 0   | 0  | 13.44 | 2  | ****    | [a:h:b]        |
| 381 | B01        | Ai01B7136    | 89  | 0  | 90 | 0   | 0   | 16 | 11.94 | 2  | ****    | [a:h:b]        |
| 382 | B01        | AHGA364915   | 91  | 12 | 89 | 0   | 0   | 3  | 0.02  | 2  | -       | [a:h:b]        |
| 383 | B01        | AHGA364936   | 89  | 12 | 89 | 0   | 0   | 5  | 0     | 2  | -       | [a:h:b]        |
| 384 | B01        | AhTE0021     | 90  | 0  | 0  | 104 | 0   | 1  | 0.02  | 1  | -       | [a:h+b+c]      |
| 385 | B01        | AGGS0408     | 104 | 0  | 91 | 0   | 0   | 0  | 13.92 | 2  | *****   | [a:h:b]        |
| 386 | B01        | AHGS0729-2   | 102 | 12 | 76 | 0   | 0   | 5  | 3.8   | 2  | -       | [a:h:b]        |
| 387 | B01        | AhTE0489     | 79  | 29 | 85 | 0   | 0   | 2  | 25.57 | 2  | *****   | [a:h:b]        |
| 388 | B01        | AGGS0833     | 108 | 0  | 81 | 0   | 0   | 6  | 16.71 | 2  | *****   | [a:h:b]        |
| 389 | B01        | AGGS2567     | 103 | 3  | 87 | 0   | 0   | 2  | 8.68  | 2  | **      | [a:h:b]        |
| 390 | B01        | AhTE0565     | 114 | 0  | 0  | 81  | 0   | 0  | 10.51 | 1  | ****    | [a:h+b+c]      |
| 391 | B01        | AHGS2027     | 99  | 7  | 83 | 0   | 0   | 6  | 3.54  | 2  | -       | [a:h:b]        |
| 392 | B01        | AGGS700      | 104 | 0  | 83 | 0   | 0   | 8  | 14.98 | 2  | *****   | [a:h:b]        |
| 393 | B01        | Ai01B11694   | 106 | 7  | 82 | 0   | 0   | 0  | 5.51  | 2  | *       | [a:h:b]        |
| 394 | B01        | AHGS1670     | 97  | 0  | 95 | 0   | 0   | 3  | 12.82 | 2  | ****    | [a:h:b]        |
| 395 | B01        | AHGA25786    | 99  | 10 | 82 | 0   | 0   | 4  | 1.95  | 2  | -       | [a:h:b]        |
| 396 | B01        | AGGS0960     | 104 | 2  | 84 | 0   | 0   | 5  | 11    | 2  | ****    | [a:h:b]        |
| 397 | B01        | AGGS0440     | 114 | 2  | 79 | 0   | 0   | 0  | 15.78 | 2  | *****   | [a:h:b]        |
| 398 | B01        | AhTE0771     | 120 | 0  | 0  | 75  | 0   | 0  | 16.84 | 1  | *****   | [a:h+b+c]      |
| 399 | B01        | AhTE0536     | 108 | 0  | 0  | 87  | 0   | 0  | 5.67  | 1  | **      | [a:h+b+c]      |
| 400 | B01        | Ad10A4720    | 98  | 13 | 81 | 0   | 0   | 3  | 1.69  | 2  | -       | [a:h:b]        |
| 401 | B01        | AHGS1524     | 105 | 13 | 75 | 0   | 0   | 2  | 5.05  | 2  | *       | [a:h:b]        |
| 402 | B01        | AHGS1462     | 101 | 19 | 74 | 0   | 0   | 1  | 8.17  | 2  | **      | [a:h:b]        |
| 403 | B01        | AGGS1363     | 96  | 18 | 73 | 0   | 0   | 8  | 6.65  | 2  | **      | [a:h:b]        |
| 404 | B01        | Ai01B8018    | 99  | 17 | 77 | 0   | 0   | 2  | 4.83  | 2  | *       | [a:h:b]        |
| 405 | B01        | AGGS2359     | 97  | 17 | 76 | 0   | 0   | 5  | 4.84  | 2  | *       | [a:h:b]        |
| 406 | B01        | AGGS1056     | 99  | 15 | 76 | 0   | 0   | 5  | 3.85  | 2  | -       | [a:h:b]        |
| 407 | B01        | AHGS1829     | 100 | 14 | 76 | 0   | 0   | 5  | 3.64  | 2  | -       | [a:h:b]        |
| 408 | B01        | AGGS1254     | 100 | 15 | 78 | 0   | 0   | 2  | 3.44  | 2  | -       | [a:h:b]        |
| 409 | B01        | AHGS2579     | 105 | 12 | 78 | 0   | 0   | 0  | 3.99  | 2  | -       | [a:h:b]        |
| 410 | B01        | AHGS1273     | 103 | 9  | 81 | 0   | 0   | 2  | 3.5   | 2  | -       | [a:h:b]        |
| 411 | B01        | AhTE0129     | 103 | 9  | 81 | 0   | 0   | 2  | 3.5   | 2  | -       | [a:h:b]        |
| 412 | B01        | AGGS1122     | 112 | 6  | 77 | 0   | 0   | 0  | 10.05 | 2  | ***     | [a:h:b]        |
| 413 | B01        | Ai01B9867    | 107 | 4  | 77 | 0   | 0   | 7  | 10.56 | 2  | ***     | [a:h:b]        |
| 414 | B01        | AGGS2580     | 91  | 6  | 80 | 0   | 0   | 18 | 3.2   | 2  | -       | [a:h:b]        |
| 415 | B01        | AGGS1612     | 102 | 7  | 82 | 0   | 0   | 4  | 4.41  | 2  | -       | [a:h:b]        |
| 416 | B01        | AHGS1369     | 111 | 0  | 80 | 0   | 0   | 4  | 18.1  | 2  | *****   | [a:h:b]        |
| 417 | B01        | AHGS3627     | 99  | 7  | 86 | 0   | 0   | 3  | 3.16  | 2  | -       | [a:h:b]        |
| 418 | B01        | Ai01B7542-1  | 105 | 3  | 86 | 0   | 0   | 1  | 9.31  | 2  | ***     | [a:h:b]        |
| 419 | B01        | AHGS2466     | 102 | 0  | 91 | 0   | 0   | 2  | 13.54 | 2  | ****    | [a:h:b]        |
| 420 | B01        | AhTE0426     | 100 | 0  | 95 | 0   | 0   | 0  | 13.14 | 2  | ****    | [a:h:b]        |
| 421 | B01        | AHGS1489     | 101 | 7  | 85 | 0   | 0   | 2  | 3.68  | 2  | -       | [a:h:b]        |
| 422 | B01        | AhTE0985     | 109 | 0  | 0  | 85  | 0   | 1  | 6.75  | 1  | ***     | [a:h+b+c]      |
| 423 | B01        | AHGS1699     | 102 | 0  | 92 | 0   | 0   | 1  | 13.48 | 2  | ****    | [a:h:b]        |



| Nr  | Chromosome | Locus        | a   | h  | b   | c  | d  | -  | X2    | Df | Signif. | Classification |
|-----|------------|--------------|-----|----|-----|----|----|----|-------|----|---------|----------------|
| 424 | B01        | AhTE0212     | 109 | 0  | 0   | 86 | 0  | 0  | 6.37  | 1  | **      | [a:h+b+c]      |
| 425 | B01        | AHGA24894    | 94  | 11 | 83  | 0  | 0  | 7  | 0.74  | 2  | -       | [a:h:b]        |
| 426 | B01        | TC23C08      | 91  | 0  | 90  | 0  | 0  | 14 | 12.07 | 2  | ****    | [a:h:b]        |
| 427 | B01        | TC1A08       | 101 | 5  | 89  | 0  | 0  | 0  | 5.31  | 2  | *       | [a:h:b]        |
| 428 | B01        | AHGS1630     | 96  | 1  | 94  | 0  | 0  | 4  | 10.71 | 2  | ****    | [a:h:b]        |
| 429 | B01        | AHGS1333     | 91  | 1  | 96  | 0  | 0  | 7  | 10.63 | 2  | ****    | [a:h:b]        |
| 430 | B01        | TC27H12      | 99  | 6  | 85  | 0  | 0  | 5  | 4.2   | 2  | -       | [a:h:b]        |
| 431 | B01        | AHGS1246     | 94  | 8  | 90  | 0  | 0  | 3  | 1.51  | 2  | -       | [a:h:b]        |
| 432 | B01        | AHS0487      | 101 | 3  | 88  | 0  | 0  | 3  | 8.14  | 2  | **      | [a:h:b]        |
| 433 | B01        | AGGS1376     | 96  | 0  | 99  | 0  | 0  | 0  | 13.05 | 2  | ****    | [a:h:b]        |
| 434 | B01        | AHGS1130     | 92  | 7  | 96  | 0  | 0  | 0  | 2.44  | 2  | -       | [a:h:b]        |
| 435 | B01        | AhTE0251     | 94  | 2  | 91  | 0  | 0  | 8  | 8.62  | 2  | **      | [a:h:b]        |
| 436 | B01        | AHGS1710     | 108 | 10 | 76  | 0  | 0  | 1  | 6.03  | 2  | **      | [a:h:b]        |
| 437 | B01        | AhTE0790     | 103 | 0  | 0   | 92 | 0  | 0  | 2.77  | 1  | *       | [a:h+b+c]      |
| 438 | B01        | GNB619       | 99  | 10 | 73  | 0  | 0  | 13 | 4.14  | 2  | -       | [a:h:b]        |
| 439 | B01        | AhTE1016     | 0   | 0  | 103 | 0  | 92 | 0  | 2.77  | 1  | *       | [a+h+d:b]      |
| 440 | B01        | AGGS2233     | 51  | 3  | 133 | 0  | 0  | 8  | 45.24 | 2  | *****   | [a:h:b]        |
| 441 | B02        | AHGS1522     | 76  | 20 | 90  | 0  | 0  | 9  | 7.56  | 2  | **      | [a:h:b]        |
| 442 | B02        | AhTE0818     | 0   | 0  | 97  | 0  | 98 | 0  | 0.64  | 1  | -       | [a+h+d:b]      |
| 443 | B02        | AHGS1278     | 94  | 12 | 85  | 0  | 0  | 4  | 0.45  | 2  | -       | [a:h:b]        |
| 444 | B02        | Ai02B25100   | 106 | 3  | 79  | 0  | 0  | 7  | 11.09 | 2  | ****    | [a:h:b]        |
| 445 | B02        | AGGS2092     | 90  | 10 | 90  | 0  | 0  | 5  | 0.32  | 2  | -       | [a:h:b]        |
| 446 | B02        | TC1E01       | 95  | 3  | 96  | 0  | 0  | 1  | 7.33  | 2  | **      | [a:h:b]        |
| 447 | B02        | GM2808       | 87  | 11 | 85  | 0  | 0  | 12 | 0.04  | 2  | -       | [a:h:b]        |
| 448 | B02        | Ai02B25013   | 102 | 12 | 74  | 0  | 0  | 7  | 4.45  | 2  | -       | [a:h:b]        |
| 449 | B02        | AhTE0887     | 73  | 5  | 110 | 0  | 0  | 7  | 11.9  | 2  | ****    | [a:h:b]        |
| 450 | B02        | AhTE0825     | 0   | 0  | 119 | 0  | 76 | 0  | 15.68 | 1  | *****   | [a+h+d:b]      |
| 451 | B02        | AGGS2532     | 93  | 10 | 91  | 0  | 0  | 1  | 0.42  | 2  | -       | [a:h:b]        |
| 452 | B02        | AHGS1232     | 103 | 10 | 70  | 0  | 0  | 12 | 6.54  | 2  | **      | [a:h:b]        |
| 453 | B02        | AGGS2393     | 94  | 10 | 87  | 0  | 0  | 4  | 0.61  | 2  | -       | [a:h:b]        |
| 454 | B02        | AHGA327396   | 97  | 5  | 84  | 0  | 0  | 9  | 5     | 2  | *       | [a:h:b]        |
| 455 | B02        | AGGS1400     | 92  | 8  | 86  | 0  | 0  | 9  | 1.41  | 2  | -       | [a:h:b]        |
| 456 | B02        | AHGS1426     | 101 | 6  | 83  | 0  | 0  | 5  | 4.92  | 2  | *       | [a:h:b]        |
| 457 | B02        | Ai02B4457    | 77  | 11 | 61  | 0  | 0  | 46 | 2.16  | 2  | -       | [a:h:b]        |
| 458 | B02        | AHGS1241     | 98  | 7  | 79  | 0  | 0  | 11 | 3.97  | 2  | -       | [a:h:b]        |
| 459 | B02        | Ai02B23281   | 102 | 9  | 80  | 0  | 0  | 4  | 3.47  | 2  | -       | [a:h:b]        |
| 460 | B02        | AGGS0297     | 98  | 8  | 83  | 0  | 0  | 6  | 2.58  | 2  | -       | [a:h:b]        |
| 461 | B02        | Ai02B20508   | 113 | 0  | 77  | 0  | 0  | 5  | 19.94 | 2  | *****   | [a:h:b]        |
| 462 | B02        | AGGS2219     | 103 | 9  | 82  | 0  | 0  | 1  | 3.28  | 2  | -       | [a:h:b]        |
| 463 | B02        | Ai02B21538   | 95  | 9  | 78  | 0  | 0  | 13 | 2.22  | 2  | -       | [a:h:b]        |
| 464 | B02        | AHGS1818     | 108 | 7  | 79  | 0  | 0  | 1  | 6.93  | 2  | **      | [a:h:b]        |
| 465 | B02        | Ai02B21379   | 108 | 10 | 73  | 0  | 0  | 4  | 7.18  | 2  | **      | [a:h:b]        |
| 466 | B02        | Ai02B20641   | 111 | 10 | 66  | 0  | 0  | 8  | 11.81 | 2  | ****    | [a:h:b]        |
| 467 | B02        | Ai02B20354   | 109 | 14 | 65  | 0  | 0  | 7  | 11.44 | 2  | ****    | [a:h:b]        |
| 468 | B02        | AGGS1643     | 110 | 11 | 71  | 0  | 0  | 3  | 8.54  | 2  | **      | [a:h:b]        |
| 469 | B02        | AHGS1251     | 106 | 16 | 70  | 0  | 0  | 3  | 8.62  | 2  | **      | [a:h:b]        |
| 470 | B02        | Ai02B19680   | 101 | 17 | 65  | 0  | 0  | 12 | 10.44 | 2  | ***     | [a:h:b]        |
| 471 | B02        | Ai02B21536-1 | 97  | 16 | 75  | 0  | 0  | 7  | 4.39  | 2  | -       | [a:h:b]        |
| 472 | B02        | AHGS1473     | 107 | 0  | 86  | 0  | 0  | 2  | 15.3  | 2  | *****   | [a:h:b]        |
| 473 | B02        | AGGS2475     | 101 | 1  | 84  | 0  | 0  | 9  | 12.02 | 2  | ****    | [a:h:b]        |
| 474 | B02        | Ai02B18857   | 103 | 7  | 72  | 0  | 0  | 13 | 7.43  | 2  | **      | [a:h:b]        |
| 475 | B02        | AGGS2019     | 103 | 17 | 70  | 0  | 0  | 5  | 8.47  | 2  | **      | [a:h:b]        |
| 476 | B02        | AHGS1845     | 106 | 18 | 69  | 0  | 0  | 2  | 10.68 | 2  | ****    | [a:h:b]        |

| Nr  | Chromosome | Locus        | a   | h  | b  | c  | d   | -  | X2    | Df | Signif. | Classification |
|-----|------------|--------------|-----|----|----|----|-----|----|-------|----|---------|----------------|
| 477 | B02        | AGGS2228     | 101 | 17 | 75 | 0  | 0   | 2  | 5.89  | 2  | *       | [a:h:b]        |
| 478 | B02        | Ai02B17748   | 99  | 17 | 72 | 0  | 0   | 7  | 6.64  | 2  | **      | [a:h:b]        |
| 479 | B02        | Ah26         | 103 | 14 | 73 | 0  | 0   | 5  | 5.46  | 2  | *       | [a:h:b]        |
| 480 | B02        | pPGPSeq4E8   | 99  | 11 | 80 | 0  | 0   | 5  | 2.1   | 2  | -       | [a:h:b]        |
| 481 | B02        | AGGS1461     | 101 | 20 | 70 | 0  | 0   | 4  | 11.18 | 2  | ****    | [a:h:b]        |
| 482 | B02        | AHGS1928     | 101 | 15 | 71 | 0  | 0   | 8  | 6.14  | 2  | **      | [a:h:b]        |
| 483 | B02        | AhTE0296     | 104 | 12 | 72 | 0  | 0   | 7  | 5.82  | 2  | *       | [a:h:b]        |
| 484 | B02        | AHGS1393     | 102 | 14 | 72 | 0  | 0   | 7  | 5.57  | 2  | *       | [a:h:b]        |
| 485 | B02        | Ai08B11147   | 95  | 12 | 74 | 0  | 0   | 14 | 2.64  | 2  | -       | [a:h:b]        |
| 486 | B02        | AGGS1238     | 101 | 16 | 72 | 0  | 0   | 6  | 6.33  | 2  | **      | [a:h:b]        |
| 487 | B02        | AHGS1530     | 106 | 13 | 73 | 0  | 0   | 3  | 6.14  | 2  | **      | [a:h:b]        |
| 488 | B02        | GNB1040-2    | 103 | 13 | 74 | 0  | 0   | 5  | 4.84  | 2  | *       | [a:h:b]        |
| 489 | B02        | Ai02B11533   | 101 | 13 | 69 | 0  | 0   | 12 | 6.2   | 2  | **      | [a:h:b]        |
| 490 | B02        | AHGA14239    | 108 | 9  | 75 | 0  | 0   | 3  | 6.85  | 2  | **      | [a:h:b]        |
| 491 | B02        | AHGS0429     | 106 | 7  | 80 | 0  | 0   | 2  | 6     | 2  | **      | [a:h:b]        |
| 492 | B02        | AGGS1344     | 107 | 5  | 82 | 0  | 0   | 1  | 7.9   | 2  | **      | [a:h:b]        |
| 493 | B02        | AC2C05       | 104 | 14 | 77 | 0  | 0   | 0  | 4.28  | 2  | -       | [a:h:b]        |
| 494 | B02        | Ai02B7886    | 99  | 13 | 76 | 0  | 0   | 7  | 3.14  | 2  | -       | [a:h:b]        |
| 495 | B02        | AGGS1533     | 104 | 17 | 71 | 0  | 0   | 3  | 8.27  | 2  | **      | [a:h:b]        |
| 496 | B02        | Ai02B8654    | 100 | 9  | 80 | 0  | 0   | 6  | 2.97  | 2  | -       | [a:h:b]        |
| 497 | B02        | AGGS1484     | 111 | 4  | 79 | 0  | 0   | 1  | 11.44 | 2  | ****    | [a:h:b]        |
| 498 | B02        | AGGS1678     | 99  | 10 | 75 | 0  | 0   | 11 | 3.55  | 2  | -       | [a:h:b]        |
| 499 | B02        | AhM022       | 101 | 8  | 81 | 0  | 0   | 5  | 3.59  | 2  | -       | [a:h:b]        |
| 500 | B02        | Ai02B7519    | 108 | 1  | 85 | 0  | 0   | 1  | 13.8  | 2  | ****    | [a:h:b]        |
| 501 | B02        | AGGS0638     | 103 | 0  | 90 | 0  | 0   | 2  | 13.8  | 2  | ****    | [a:h:b]        |
| 502 | B02        | Ai02B8213    | 106 | 7  | 75 | 0  | 0   | 7  | 7.5   | 2  | **      | [a:h:b]        |
| 503 | B02        | Ai02B21536-2 | 95  | 5  | 88 | 0  | 0   | 7  | 4.41  | 2  | -       | [a:h:b]        |
| 504 | B02        | AHGS1261     | 99  | 10 | 75 | 0  | 0   | 11 | 3.55  | 2  | -       | [a:h:b]        |
| 505 | B02        | AhTE0813     | 121 | 0  | 0  | 74 | 0   | 0  | 18.04 | 1  | *****   | [a:h+b+c]      |
| 506 | B02        | AhTE0577     | 90  | 17 | 79 | 0  | 0   | 9  | 3.34  | 2  | -       | [a:h:b]        |
| 507 | B02        | TC1B02       | 104 | 11 | 73 | 0  | 0   | 7  | 5.5   | 2  | *       | [a:h:b]        |
| 508 | B02        | AHGS1853     | 107 | 10 | 77 | 0  | 0   | 1  | 5.35  | 2  | *       | [a:h:b]        |
| 509 | B02        | AGGS1532     | 108 | 34 | 50 | 0  | 0   | 3  | 61.71 | 2  | *****   | [a:h:b]        |
| 510 | B02        | AGGS2332     | 91  | 13 | 85 | 0  | 0   | 6  | 0.33  | 2  | -       | [a:h:b]        |
| 511 | B02        | AGGS2195     | 104 | 2  | 87 | 0  | 0   | 2  | 10.55 | 2  | ***     | [a:h:b]        |
| 512 | B02        | AGGS1468     | 108 | 0  | 86 | 0  | 0   | 1  | 15.59 | 2  | *****   | [a:h:b]        |
| 513 | B02        | AHGS1805     | 105 | 0  | 83 | 0  | 0   | 7  | 15.28 | 2  | *****   | [a:h:b]        |
| 514 | B02        | AGGS2413     | 106 | 0  | 87 | 0  | 0   | 2  | 14.86 | 2  | *****   | [a:h:b]        |
| 515 | B02        | AhTE0791     | 0   | 0  | 93 | 0  | 102 | 0  | 0.05  | 1  | -       | [a+h+d:b]      |
| 516 | B02        | AGGS1325     | 107 | 0  | 79 | 0  | 0   | 9  | 16.9  | 2  | *****   | [a:h:b]        |
| 517 | B02        | AHGS1419     | 103 | 9  | 80 | 0  | 0   | 3  | 3.74  | 2  | -       | [a:h:b]        |
| 518 | B02        | AGGS1592     | 108 | 7  | 70 | 0  | 0   | 10 | 10.25 | 2  | ***     | [a:h:b]        |
| 519 | B02        | Ai02B4199    | 87  | 30 | 63 | 0  | 0   | 15 | 36.75 | 2  | *****   | [a:h:b]        |
| 520 | B02        | Ai02B6837    | 95  | 8  | 82 | 0  | 0   | 10 | 2.15  | 2  | -       | [a:h:b]        |
| 521 | B02        | Ai02B2634    | 97  | 16 | 73 | 0  | 0   | 9  | 5.06  | 2  | *       | [a:h:b]        |
| 522 | B02        | Ai02B2534    | 95  | 9  | 74 | 0  | 0   | 17 | 3.08  | 2  | -       | [a:h:b]        |
| 523 | B02        | Ai02B2356    | 101 | 8  | 79 | 0  | 0   | 7  | 4.02  | 2  | -       | [a:h:b]        |
| 524 | B02        | AGGS0399     | 105 | 0  | 81 | 0  | 0   | 9  | 15.7  | 2  | *****   | [a:h:b]        |
| 525 | B02        | Ai02B2350    | 108 | 2  | 73 | 0  | 0   | 12 | 15.45 | 2  | *****   | [a:h:b]        |
| 526 | B02        | AHGS1940     | 96  | 9  | 88 | 0  | 0   | 2  | 1.18  | 2  | -       | [a:h:b]        |
| 527 | B02        | TC9F04       | 100 | 6  | 83 | 0  | 0   | 6  | 4.68  | 2  | *       | [a:h:b]        |
| 528 | B02        | AhTE0775     | 116 | 0  | 0  | 79 | 0   | 0  | 12.46 | 1  | *****   | [a:h+b+c]      |
| 529 | B02        | AHGS2344     | 110 | 13 | 65 | 0  | 0   | 7  | 11.63 | 2  | ****    | [a:h:b]        |

| Nr  | Chromosome | Locus      | a   | h  | b   | c  | d   | -  | X2    | Df | Signif. | Classification |
|-----|------------|------------|-----|----|-----|----|-----|----|-------|----|---------|----------------|
| 530 | B02        | GM2196     | 108 | 5  | 73  | 0  | 0   | 9  | 11.05 | 2  | ****    | [a:h:b]        |
| 531 | B02        | Ai06B27638 | 107 | 5  | 74  | 0  | 0   | 9  | 10.27 | 2  | ***     | [a:h:b]        |
| 532 | B02        | Ad02A625   | 92  | 11 | 80  | 0  | 0   | 12 | 0.86  | 2  | -       | [a:h:b]        |
| 533 | B03        | GA27       | 90  | 7  | 93  | 0  | 0   | 5  | 2.19  | 2  | -       | [a:h:b]        |
| 534 | B03        | AHGS1176   | 96  | 4  | 91  | 0  | 0   | 4  | 5.77  | 2  | *       | [a:h:b]        |
| 535 | B03        | GM1996     | 93  | 8  | 83  | 0  | 0   | 11 | 1.72  | 2  | -       | [a:h:b]        |
| 536 | B03        | Ai08B16802 | 87  | 22 | 81  | 0  | 0   | 5  | 9.41  | 2  | ***     | [a:h:b]        |
| 537 | B03        | AGGS1276   | 91  | 15 | 89  | 0  | 0   | 0  | 0.71  | 2  | -       | [a:h:b]        |
| 538 | B03        | AHGS1561   | 95  | 15 | 83  | 0  | 0   | 2  | 1.56  | 2  | -       | [a:h:b]        |
| 539 | B03        | AGGS1369   | 99  | 11 | 79  | 0  | 0   | 6  | 2.32  | 2  | -       | [a:h:b]        |
| 540 | B03        | GM1854     | 71  | 1  | 112 | 0  | 0   | 11 | 19.97 | 2  | *****   | [a:h:b]        |
| 541 | B04        | AGGS1671   | 112 | 5  | 70  | 0  | 0   | 8  | 14.14 | 2  | *****   | [a:h:b]        |
| 542 | B04        | Ai04B16    | 105 | 1  | 80  | 0  | 0   | 9  | 13.94 | 2  | *****   | [a:h:b]        |
| 543 | B04        | Ad04A21    | 108 | 13 | 71  | 0  | 0   | 3  | 7.69  | 2  | **      | [a:h:b]        |
| 544 | B04        | AGGS2384   | 0   | 0  | 78  | 0  | 104 | 13 | 1.18  | 1  | -       | [a+h+d:b]      |
| 545 | B04        | AhTE0654   | 118 | 0  | 0   | 76 | 0   | 1  | 15.16 | 1  | *****   | [a:h+b+c]      |
| 546 | B04        | TC11H06    | 94  | 13 | 74  | 0  | 0   | 14 | 2.63  | 2  | -       | [a:h:b]        |
| 547 | B04        | AhTE0908   | 0   | 0  | 89  | 0  | 99  | 7  | 0.02  | 1  | -       | [a+h+d:b]      |
| 548 | B04        | AHGS1703   | 108 | 9  | 77  | 0  | 0   | 1  | 6.14  | 2  | **      | [a:h:b]        |
| 549 | B04        | AHGS2539   | 117 | 5  | 71  | 0  | 0   | 2  | 16.11 | 2  | *****   | [a:h:b]        |
| 550 | B04        | EE22       | 109 | 14 | 60  | 0  | 0   | 12 | 14.61 | 2  | *****   | [a:h:b]        |
| 551 | B04        | AHGA161495 | 120 | 5  | 67  | 0  | 0   | 3  | 19.96 | 2  | *****   | [a:h:b]        |
| 552 | B04        | AHGA161468 | 119 | 8  | 66  | 0  | 0   | 2  | 16.98 | 2  | *****   | [a:h:b]        |
| 553 | B04        | AHGA161510 | 120 | 5  | 66  | 0  | 0   | 4  | 20.59 | 2  | *****   | [a:h:b]        |
| 554 | B04        | AhTE0659   | 125 | 0  | 0   | 70 | 0   | 0  | 23.24 | 1  | *****   | [a:h+b+c]      |
| 555 | B04        | GM1445     | 115 | 10 | 62  | 0  | 0   | 8  | 16.28 | 2  | *****   | [a:h:b]        |
| 556 | B04        | Ai04B2241  | 123 | 4  | 68  | 0  | 0   | 0  | 22.41 | 2  | *****   | [a:h:b]        |
| 557 | B04        | AGGS1601   | 114 | 8  | 68  | 0  | 0   | 5  | 13.23 | 2  | ****    | [a:h:b]        |
| 558 | B04        | AhTE0945   | 109 | 0  | 0   | 86 | 0   | 0  | 6.37  | 1  | **      | [a:h+b+c]      |
| 559 | B04        | AhTE0903   | 114 | 0  | 0   | 81 | 0   | 0  | 10.51 | 1  | ****    | [a:h+b+c]      |
| 560 | B04        | AhTE0923   | 146 | 0  | 0   | 46 | 0   | 3  | 65.59 | 1  | *****   | [a:h+b+c]      |
| 561 | B04        | AGGS1795-1 | 126 | 7  | 60  | 0  | 0   | 2  | 26.34 | 2  | *****   | [a:h:b]        |
| 562 | B04        | AhTE0777   | 144 | 0  | 0   | 51 | 0   | 0  | 56.96 | 1  | *****   | [a:h+b+c]      |
| 563 | B04        | AhTE0906   | 137 | 0  | 0   | 58 | 0   | 0  | 42.81 | 1  | *****   | [a:h+b+c]      |
| 564 | B04        | AGGS1054   | 118 | 3  | 65  | 0  | 0   | 9  | 22.93 | 2  | *****   | [a:h:b]        |
| 565 | B04        | Ai04B4849  | 111 | 7  | 76  | 0  | 0   | 1  | 9.05  | 2  | **      | [a:h:b]        |
| 566 | B04        | AhTE0882   | 126 | 0  | 0   | 69 | 0   | 0  | 24.64 | 1  | *****   | [a:h+b+c]      |
| 567 | B04        | AhTE0936   | 133 | 0  | 0   | 62 | 0   | 0  | 35.63 | 1  | *****   | [a:h+b+c]      |
| 568 | B04        | AhTE0416   | 132 | 0  | 0   | 63 | 0   | 0  | 33.93 | 1  | *****   | [a:h+b+c]      |
| 569 | B04        | AHGS1552   | 126 | 1  | 65  | 0  | 0   | 3  | 31.43 | 2  | *****   | [a:h:b]        |
| 570 | B04        | AhTE0237   | 123 | 2  | 70  | 0  | 0   | 0  | 24.45 | 2  | *****   | [a:h:b]        |
| 571 | B04        | AGGS2488   | 130 | 0  | 0   | 61 | 0   | 4  | 34.43 | 1  | *****   | [a:h+b+c]      |
| 572 | B04        | AGGS1783   | 122 | 0  | 0   | 66 | 0   | 7  | 24.51 | 1  | *****   | [a:h+b+c]      |
| 573 | B04        | AHGS1617   | 124 | 4  | 66  | 0  | 0   | 1  | 24.3  | 2  | *****   | [a:h:b]        |
| 574 | B04        | AHGS1579   | 126 | 6  | 63  | 0  | 0   | 0  | 25.06 | 2  | *****   | [a:h:b]        |
| 575 | B04        | Ai06B31304 | 118 | 9  | 61  | 0  | 0   | 7  | 19.12 | 2  | *****   | [a:h:b]        |
| 576 | B04        | Ai04B9397  | 125 | 7  | 62  | 0  | 0   | 1  | 24.13 | 2  | *****   | [a:h:b]        |
| 577 | B04        | Ad05A20478 | 0   | 0  | 59  | 0  | 128 | 8  | 17.63 | 1  | *****   | [a+h+d:b]      |
| 578 | B04        | AGGS1750   | 121 | 9  | 65  | 0  | 0   | 0  | 18.04 | 2  | *****   | [a:h:b]        |
| 579 | B04        | AHGS1311   | 123 | 9  | 62  | 0  | 0   | 1  | 21.32 | 2  | *****   | [a:h:b]        |
| 580 | B04        | AHGS0390   | 117 | 8  | 60  | 0  | 0   | 10 | 19.9  | 2  | *****   | [a:h:b]        |
| 581 | B04        | AHGS0288   | 122 | 6  | 64  | 0  | 0   | 3  | 21.89 | 2  | *****   | [a:h:b]        |
| 582 | B04        | AGGS1370   | 121 | 9  | 65  | 0  | 0   | 0  | 18.04 | 2  | *****   | [a:h:b]        |

| Nr  | Chromosome | Locus          | a   | h  | b   | c  | d   | -  | X2    | Df | Signif. | Classification |
|-----|------------|----------------|-----|----|-----|----|-----|----|-------|----|---------|----------------|
| 583 | B04        | AhTE0335       | 121 | 7  | 66  | 0  | 0   | 1  | 18.94 | 2  | *****   | [a:h:b]        |
| 584 | B04        | AGGS1101       | 122 | 5  | 60  | 0  | 0   | 8  | 26.01 | 2  | *****   | [a:h:b]        |
| 585 | B04        | AGGS1324       | 117 | 1  | 59  | 0  | 0   | 18 | 30.04 | 2  | *****   | [a:h:b]        |
| 586 | B04        | Ai04B19238     | 123 | 0  | 72  | 0  | 0   | 0  | 27.23 | 2  | *****   | [a:h:b]        |
| 587 | B04        | AGGS734        | 118 | 2  | 64  | 0  | 0   | 11 | 25.28 | 2  | *****   | [a:h:b]        |
| 588 | B04        | AhTE0261       | 116 | 2  | 77  | 0  | 0   | 0  | 17.4  | 2  | *****   | [a:h:b]        |
| 589 | B04        | AGGS1512       | 111 | 5  | 78  | 0  | 0   | 1  | 10.45 | 2  | ***     | [a:h:b]        |
| 590 | B04        | Ai04B5526      | 106 | 2  | 76  | 0  | 0   | 11 | 13.59 | 2  | ****    | [a:h:b]        |
| 591 | B04        | GM2246         | 111 | 3  | 74  | 0  | 0   | 7  | 14.72 | 2  | *****   | [a:h:b]        |
| 592 | B04        | pPGSseq17F6    | 125 | 3  | 60  | 0  | 0   | 7  | 30.92 | 2  | *****   | [a:h:b]        |
| 593 | B04        | AGGS2251       | 107 | 12 | 74  | 0  | 0   | 2  | 6.02  | 2  | **      | [a:h:b]        |
| 594 | B04        | GM1959         | 100 | 5  | 72  | 0  | 0   | 18 | 8.27  | 2  | **      | [a:h:b]        |
| 595 | B04        | Ad04A12402     | 85  | 45 | 59  | 0  | 0   | 6  | 103.3 | 2  | *****   | [a:h:b]        |
| 596 | B04        | PMc348         | 0   | 0  | 64  | 0  | 122 | 9  | 11.61 | 1  | *****   | [a+h+d:b]      |
| 597 | B04        | AGGS1102       | 114 | 2  | 71  | 0  | 0   | 8  | 19.11 | 2  | *****   | [a:h:b]        |
| 598 | B04        | Ai04B12763     | 123 | 1  | 69  | 0  | 0   | 2  | 26.94 | 2  | *****   | [a:h:b]        |
| 599 | B04        | AGGS1613       | 94  | 15 | 77  | 0  | 0   | 9  | 2.7   | 2  | -       | [a:h:b]        |
| 600 | B04        | AhTE0191       | 116 | 0  | 78  | 0  | 0   | 1  | 20.87 | 2  | *****   | [a:h:b]        |
| 601 | B04        | IPAHM105       | 116 | 3  | 75  | 0  | 0   | 1  | 16.57 | 2  | *****   | [a:h:b]        |
| 602 | B04        | AGGS2135       | 114 | 3  | 71  | 0  | 0   | 7  | 17.44 | 2  | *****   | [a:h:b]        |
| 603 | B04        | AGGS0284       | 111 | 0  | 83  | 0  | 0   | 1  | 17.24 | 2  | *****   | [a:h:b]        |
| 604 | B04        | AHGS1773       | 128 | 1  | 66  | 0  | 0   | 0  | 31.98 | 2  | *****   | [a:h:b]        |
| 605 | B04        | AHGS1937       | 110 | 10 | 73  | 0  | 0   | 2  | 7.94  | 2  | **      | [a:h:b]        |
| 606 | B04        | AGGS1621       | 110 | 0  | 84  | 0  | 0   | 1  | 16.65 | 2  | *****   | [a:h:b]        |
| 607 | B04        | AHTE0189       | 101 | 0  | 87  | 0  | 0   | 7  | 13.65 | 2  | ****    | [a:h:b]        |
| 608 | B04        | AhTE0959       | 118 | 0  | 0   | 76 | 0   | 1  | 15.16 | 1  | *****   | [a:h+b+c]      |
| 609 | B04        | AhTE0639       | 122 | 0  | 0   | 72 | 0   | 1  | 19.97 | 1  | *****   | [a:h+b+c]      |
| 610 | B04        | AhTE0107       | 122 | 1  | 72  | 0  | 0   | 0  | 24.63 | 2  | *****   | [a:h:b]        |
| 611 | B04        | AGGS2509       | 110 | 8  | 72  | 0  | 0   | 5  | 9.46  | 2  | ***     | [a:h:b]        |
| 612 | B04        | AhTE0796       | 119 | 0  | 0   | 76 | 0   | 0  | 15.68 | 1  | *****   | [a:h+b+c]      |
| 613 | B04        | GM2106         | 103 | 9  | 76  | 0  | 0   | 7  | 4.82  | 2  | *       | [a:h:b]        |
| 614 | B04        | PMc660         | 98  | 0  | 0   | 86 | 0   | 11 | 3.01  | 1  | *       | [a:h+b+c]      |
| 615 | B04        | EM142          | 0   | 0  | 75  | 0  | 105 | 15 | 1.96  | 1  | -       | [a+h+d:b]      |
| 616 | B04        | pPGSseq15C12-1 | 86  | 15 | 80  | 0  | 0   | 14 | 1.49  | 2  | -       | [a:h:b]        |
| 617 | B04        | AGGS0396-2     | 91  | 8  | 78  | 0  | 0   | 18 | 1.92  | 2  | -       | [a:h:b]        |
| 618 | B04        | Ai04B20539     | 82  | 4  | 98  | 0  | 0   | 11 | 6.7   | 2  | **      | [a:h:b]        |
| 619 | B04        | AhTE1009       | 0   | 0  | 111 | 0  | 82  | 2  | 8.77  | 1  | ****    | [a+h+d:b]      |
| 620 | B04        | AHGA176194     | 99  | 44 | 40  | 0  | 0   | 12 | 119.2 | 2  | *****   | [a:h:b]        |
| 621 | B04        | Ah325          | 55  | 0  | 140 | 0  | 0   | 0  | 52.52 | 2  | *****   | [a:h:b]        |
| 622 | B05        | Ad05A19349     | 0   | 0  | 97  | 0  | 91  | 7  | 1.68  | 1  | -       | [a+h+d:b]      |
| 623 | B05        | AHGS1342       | 92  | 12 | 91  | 0  | 0   | 0  | 0.01  | 2  | -       | [a:h:b]        |
| 624 | B05        | Ai05B28050     | 136 | 8  | 50  | 0  | 0   | 1  | 42.16 | 2  | *****   | [a:h:b]        |
| 625 | B05        | Ai05B32361     | 103 | 2  | 89  | 0  | 0   | 1  | 10.1  | 2  | ***     | [a:h:b]        |
| 626 | B05        | GA72           | 114 | 3  | 76  | 0  | 0   | 2  | 15.24 | 2  | *****   | [a:h:b]        |
| 627 | B05        | Ad05A20643-1   | 120 | 8  | 59  | 0  | 0   | 8  | 22.47 | 2  | *****   | [a:h:b]        |
| 628 | B05        | AhTE0756       | 122 | 0  | 0   | 73 | 0   | 0  | 19.27 | 1  | *****   | [a:h+b+c]      |
| 629 | B05        | AHGS1770       | 118 | 2  | 68  | 0  | 0   | 7  | 22.81 | 2  | *****   | [a:h:b]        |
| 630 | B05        | AGGS1183       | 114 | 10 | 71  | 0  | 0   | 0  | 10.53 | 2  | ***     | [a:h:b]        |
| 631 | B05        | AGGS0673       | 107 | 4  | 74  | 0  | 0   | 10 | 11.55 | 2  | ****    | [a:h:b]        |
| 632 | B05        | AhTE0806       | 135 | 0  | 0   | 60 | 0   | 0  | 39.14 | 1  | *****   | [a:h+b+c]      |
| 633 | B05        | TC6E01         | 124 | 9  | 55  | 0  | 0   | 7  | 27.7  | 2  | *****   | [a:h:b]        |
| 634 | B05        | Ad05A18236     | 129 | 0  | 56  | 0  | 0   | 10 | 43.06 | 2  | *****   | [a:h:b]        |
| 635 | B05        | AGGS2147       | 80  | 38 | 75  | 0  | 0   | 2  | 59.63 | 2  | *****   | [a:h:b]        |

| Nr  | Chromosome | Locus       | a   | h  | b  | c  | d | -  | X2    | Df | Signif. | Classification |
|-----|------------|-------------|-----|----|----|----|---|----|-------|----|---------|----------------|
| 636 | B05        | AHGA152194  | 129 | 0  | 64 | 0  | 0 | 2  | 36.22 | 2  | *****   | [a:h:b]        |
| 637 | B05        | AHGA152207  | 134 | 6  | 53 | 0  | 0 | 2  | 39.51 | 2  | *****   | [a:h:b]        |
| 638 | B05        | AGGS0973    | 122 | 3  | 65 | 0  | 0 | 5  | 25.32 | 2  | *****   | [a:h:b]        |
| 639 | B05        | pPGSseq9G5  | 122 | 3  | 59 | 0  | 0 | 11 | 29.71 | 2  | *****   | [a:h:b]        |
| 640 | B05        | AhTE0119    | 129 | 17 | 48 | 0  | 0 | 1  | 38.16 | 2  | *****   | [a:h:b]        |
| 641 | B05        | AHGS1228    | 127 | 15 | 46 | 0  | 0 | 7  | 38.18 | 2  | *****   | [a:h:b]        |
| 642 | B05        | AHGS1457    | 110 | 17 | 51 | 0  | 0 | 17 | 24.17 | 2  | *****   | [a:h:b]        |
| 643 | B05        | IPAHM354    | 129 | 17 | 45 | 0  | 0 | 4  | 41.7  | 2  | *****   | [a:h:b]        |
| 644 | B05        | pPGSSeq15D6 | 124 | 1  | 69 | 0  | 0 | 1  | 27.52 | 2  | *****   | [a:h:b]        |
| 645 | B05        | AhM082      | 128 | 15 | 47 | 0  | 0 | 5  | 37.71 | 2  | *****   | [a:h:b]        |
| 646 | B05        | GM1555      | 131 | 0  | 57 | 0  | 0 | 7  | 43.6  | 2  | *****   | [a:h:b]        |
| 647 | B05        | AGGS1632    | 137 | 1  | 54 | 0  | 0 | 3  | 49.03 | 2  | *****   | [a:h:b]        |
| 648 | B05        | Ad05A19244  | 134 | 1  | 52 | 0  | 0 | 8  | 48.78 | 2  | *****   | [a:h:b]        |
| 649 | B05        | Ai05B15046  | 115 | 4  | 65 | 0  | 0 | 11 | 19.71 | 2  | *****   | [a:h:b]        |
| 650 | B05        | AHGS2568    | 136 | 3  | 47 | 0  | 0 | 9  | 52.25 | 2  | *****   | [a:h:b]        |
| 651 | B05        | Ai05B26922  | 119 | 3  | 63 | 0  | 0 | 10 | 24.85 | 2  | *****   | [a:h:b]        |
| 652 | B05        | Ai05B25638  | 135 | 7  | 51 | 0  | 0 | 2  | 41.26 | 2  | *****   | [a:h:b]        |
| 653 | B05        | AGGS1299    | 121 | 2  | 67 | 0  | 0 | 5  | 25.13 | 2  | *****   | [a:h:b]        |
| 654 | B05        | Ai05B19811  | 127 | 1  | 63 | 0  | 0 | 4  | 33.56 | 2  | *****   | [a:h:b]        |
| 655 | B05        | AGGS0243    | 130 | 17 | 44 | 0  | 0 | 4  | 43.59 | 2  | *****   | [a:h:b]        |
| 656 | B05        | AHGS1624    | 133 | 5  | 54 | 0  | 0 | 3  | 39.03 | 2  | *****   | [a:h:b]        |
| 657 | B05        | AGGS1754    | 128 | 13 | 51 | 0  | 0 | 3  | 33.03 | 2  | *****   | [a:h:b]        |
| 658 | B05        | AHGS2141    | 125 | 9  | 48 | 0  | 0 | 13 | 35.28 | 2  | *****   | [a:h:b]        |
| 659 | B05        | AHGS1188    | 128 | 6  | 55 | 0  | 0 | 6  | 33.13 | 2  | *****   | [a:h:b]        |
| 660 | B05        | AGGS2115    | 125 | 10 | 48 | 0  | 0 | 12 | 34.75 | 2  | *****   | [a:h:b]        |
| 661 | B05        | AGGS1481    | 129 | 2  | 54 | 0  | 0 | 10 | 40.87 | 2  | *****   | [a:h:b]        |
| 662 | B05        | AGGS1262    | 134 | 5  | 54 | 0  | 0 | 2  | 39.78 | 2  | *****   | [a:h:b]        |
| 663 | B05        | AHGS1203    | 123 | 8  | 48 | 0  | 0 | 16 | 34.49 | 2  | *****   | [a:h:b]        |
| 664 | B05        | AHGS2795    | 132 | 13 | 41 | 0  | 0 | 9  | 47.66 | 2  | *****   | [a:h:b]        |
| 665 | B05        | AGGS0244    | 130 | 12 | 44 | 0  | 0 | 9  | 42.43 | 2  | *****   | [a:h:b]        |
| 666 | B05        | AGGS1464    | 135 | 3  | 46 | 0  | 0 | 11 | 52.62 | 2  | *****   | [a:h:b]        |
| 667 | B05        | Ai05B12077  | 134 | 8  | 48 | 0  | 0 | 5  | 42.87 | 2  | *****   | [a:h:b]        |
| 668 | B05        | AGGS1691    | 131 | 11 | 50 | 0  | 0 | 3  | 36.54 | 2  | *****   | [a:h:b]        |
| 669 | B05        | IPAHM282    | 125 | 10 | 50 | 0  | 0 | 10 | 32.66 | 2  | *****   | [a:h:b]        |
| 670 | B05        | AHGS2195    | 131 | 9  | 54 | 0  | 0 | 1  | 33.46 | 2  | *****   | [a:h:b]        |
| 671 | B05        | AGGS1645    | 128 | 8  | 56 | 0  | 0 | 3  | 30.22 | 2  | *****   | [a:h:b]        |
| 672 | B05        | PM36-1      | 123 | 6  | 58 | 0  | 0 | 8  | 27.05 | 2  | *****   | [a:h:b]        |
| 673 | B05        | AHGS1682    | 130 | 4  | 60 | 0  | 0 | 1  | 32.75 | 2  | *****   | [a:h:b]        |
| 674 | B05        | TC5D01      | 127 | 8  | 57 | 0  | 0 | 3  | 28.64 | 2  | *****   | [a:h:b]        |
| 675 | B05        | AHGS2509    | 123 | 8  | 49 | 0  | 0 | 15 | 33.45 | 2  | *****   | [a:h:b]        |
| 676 | B05        | Ai03B33341  | 125 | 0  | 58 | 0  | 0 | 12 | 38.37 | 2  | *****   | [a:h:b]        |
| 677 | B05        | Ad10A3962   | 129 | 13 | 51 | 0  | 0 | 2  | 33.7  | 2  | *****   | [a:h:b]        |
| 678 | B05        | AGGS0979    | 124 | 1  | 68 | 0  | 0 | 2  | 28.15 | 2  | *****   | [a:h:b]        |
| 679 | B05        | AHGS1497    | 125 | 2  | 56 | 0  | 0 | 12 | 36.06 | 2  | *****   | [a:h:b]        |
| 680 | B05        | TC19E01     | 129 | 2  | 61 | 0  | 0 | 3  | 34.58 | 2  | *****   | [a:h:b]        |
| 681 | B05        | AHGA221480  | 131 | 4  | 58 | 0  | 0 | 2  | 35.2  | 2  | *****   | [a:h:b]        |
| 682 | B05        | AHGS1672    | 129 | 0  | 55 | 0  | 0 | 11 | 44.01 | 2  | *****   | [a:h:b]        |
| 683 | B05        | AhTE0553-2  | 132 | 0  | 0  | 56 | 0 | 7  | 41.12 | 1  | *****   | [a:h+b+c]      |
| 684 | B05        | AhTE0940    | 166 | 0  | 0  | 29 | 0 | 0  | 114.6 | 1  | *****   | [a:h+b+c]      |
| 685 | B05        | AHGA44686   | 121 | 5  | 55 | 0  | 0 | 14 | 29.43 | 2  | *****   | [a:h:b]        |
| 686 | B05        | AHGS1755    | 126 | 6  | 60 | 0  | 0 | 3  | 27.4  | 2  | *****   | [a:h:b]        |
| 687 | B05        | AHGS0729-1  | 129 | 4  | 58 | 0  | 0 | 4  | 33.78 | 2  | *****   | [a:h:b]        |
| 688 | B05        | AGGS2216    | 124 | 3  | 62 | 0  | 0 | 6  | 28.71 | 2  | *****   | [a:h:b]        |

| Nr  | Chromosome | Locus         | a   | h  | b  | c  | d   | -  | X2    | Df | Signif. | Classification |
|-----|------------|---------------|-----|----|----|----|-----|----|-------|----|---------|----------------|
| 689 | B05        | AHGS1532      | 126 | 7  | 61 | 0  | 0   | 1  | 25.54 | 2  | *****   | [a:h:b]        |
| 690 | B05        | AGGS2287      | 122 | 6  | 60 | 0  | 0   | 7  | 24.81 | 2  | *****   | [a:h:b]        |
| 691 | B05        | AGGS0311      | 126 | 1  | 59 | 0  | 0   | 9  | 36.1  | 2  | *****   | [a:h:b]        |
| 692 | B05        | AHGS1440-1    | 117 | 4  | 55 | 0  | 0   | 19 | 28.05 | 2  | *****   | [a:h:b]        |
| 693 | B05        | AhTE0211      | 145 | 0  | 0  | 50 | 0   | 0  | 59.15 | 1  | *****   | [a:h+b+c]      |
| 694 | B05        | AGGS0670      | 127 | 0  | 63 | 0  | 0   | 5  | 35.66 | 2  | *****   | [a:h:b]        |
| 695 | B05        | AHGS2241      | 127 | 0  | 65 | 0  | 0   | 3  | 34.16 | 2  | *****   | [a:h:b]        |
| 696 | B05        | Ad05A20185    | 120 | 6  | 56 | 0  | 0   | 13 | 26.72 | 2  | *****   | [a:h:b]        |
| 697 | B05        | AGGS2398      | 131 | 5  | 59 | 0  | 0   | 0  | 32.88 | 2  | *****   | [a:h:b]        |
| 698 | B05        | Ai05B5265     | 117 | 3  | 65 | 0  | 0   | 10 | 22.35 | 2  | *****   | [a:h:b]        |
| 699 | B05        | AGGS2272      | 121 | 2  | 68 | 0  | 0   | 4  | 24.51 | 2  | *****   | [a:h:b]        |
| 700 | B05        | AHGA363492    | 112 | 0  | 71 | 0  | 0   | 12 | 22    | 2  | *****   | [a:h:b]        |
| 701 | B05        | IPAHM73       | 120 | 6  | 64 | 0  | 0   | 5  | 20.71 | 2  | *****   | [a:h:b]        |
| 702 | B05        | AHGA363491    | 118 | 6  | 66 | 0  | 0   | 5  | 18.28 | 2  | *****   | [a:h:b]        |
| 703 | B05        | ARS590        | 119 | 4  | 63 | 0  | 0   | 9  | 23.32 | 2  | *****   | [a:h:b]        |
| 704 | B05        | AhTE0319      | 120 | 4  | 71 | 0  | 0   | 0  | 19    | 2  | *****   | [a:h:b]        |
| 705 | B05        | AhTE0446      | 122 | 3  | 70 | 0  | 0   | 0  | 22.18 | 2  | *****   | [a:h:b]        |
| 706 | B05        | AGGS0351      | 106 | 4  | 80 | 0  | 0   | 5  | 9.37  | 2  | ***     | [a:h:b]        |
| 707 | B05        | AHGS1750      | 119 | 10 | 66 | 0  | 0   | 0  | 15.78 | 2  | *****   | [a:h:b]        |
| 708 | B05        | AGGS0955      | 120 | 2  | 69 | 0  | 0   | 4  | 23.35 | 2  | *****   | [a:h:b]        |
| 709 | B05        | GM1539        | 109 | 1  | 72 | 0  | 0   | 13 | 18.12 | 2  | *****   | [a:h:b]        |
| 710 | B06        | Ai06B32416    | 95  | 11 | 76 | 0  | 0   | 13 | 2.13  | 2  | -       | [a:h:b]        |
| 711 | B06        | Ai06B29716    | 85  | 6  | 91 | 0  | 0   | 13 | 2.92  | 2  | -       | [a:h:b]        |
| 712 | B06        | AHGS1267      | 85  | 2  | 93 | 0  | 0   | 15 | 8.49  | 2  | **      | [a:h:b]        |
| 713 | B07        | AGGS1513      | 100 | 6  | 86 | 0  | 0   | 3  | 4.29  | 2  | -       | [a:h:b]        |
| 714 | B07        | AGGS1620      | 100 | 7  | 84 | 0  | 0   | 4  | 3.61  | 2  | -       | [a:h:b]        |
| 715 | B07        | pPGSSeq13B7   | 100 | 0  | 89 | 0  | 0   | 6  | 13.28 | 2  | ****    | [a:h:b]        |
| 716 | B07        | Ai07B12485    | 97  | 0  | 98 | 0  | 0   | 0  | 13.01 | 2  | ****    | [a:h:b]        |
| 717 | B07        | AGGS2425      | 98  | 3  | 91 | 0  | 0   | 3  | 7.47  | 2  | **      | [a:h:b]        |
| 718 | B08        | AhTE0477      | 112 | 2  | 81 | 0  | 0   | 0  | 14.34 | 2  | *****   | [a:h:b]        |
| 719 | B08        | AGGS1197      | 98  | 17 | 77 | 0  | 0   | 3  | 4.67  | 2  | *       | [a:h:b]        |
| 720 | B08        | AHGS2602      | 110 | 9  | 76 | 0  | 0   | 0  | 7.21  | 2  | **      | [a:h:b]        |
| 721 | B08        | Ad90F2        | 101 | 15 | 63 | 0  | 0   | 16 | 9.99  | 2  | ***     | [a:h:b]        |
| 722 | B08        | AhTE0658      | 0   | 0  | 85 | 0  | 110 | 0  | 0.85  | 1  | -       | [a+h+d:b]      |
| 723 | B08        | AHGS1470      | 102 | 0  | 89 | 0  | 0   | 4  | 13.68 | 2  | ****    | [a:h:b]        |
| 724 | B08        | AGGS2186      | 104 | 0  | 88 | 0  | 0   | 3  | 14.22 | 2  | *****   | [a:h:b]        |
| 725 | B08        | ML1G04        | 108 | 9  | 78 | 0  | 0   | 0  | 5.81  | 2  | *       | [a:h:b]        |
| 726 | B08        | Ai08B2682     | 104 | 0  | 85 | 0  | 0   | 6  | 14.64 | 2  | *****   | [a:h:b]        |
| 727 | B08        | AhTE0824      | 129 | 9  | 55 | 0  | 0   | 2  | 31.09 | 2  | *****   | [a:h:b]        |
| 728 | B08        | pPGPseq5D1    | 104 | 16 | 66 | 0  | 0   | 9  | 10.04 | 2  | ***     | [a:h:b]        |
| 729 | B09        | AHGA161466    | 120 | 1  | 71 | 0  | 0   | 3  | 24.09 | 2  | *****   | [a:h:b]        |
| 730 | B09        | Ai09B5213     | 111 | 7  | 72 | 0  | 0   | 5  | 10.67 | 2  | ****    | [a:h:b]        |
| 731 | B09        | Ad10A4326     | 99  | 11 | 80 | 0  | 0   | 5  | 2.1   | 2  | -       | [a:h:b]        |
| 732 | B09        | AHBGSI1008H04 | 100 | 2  | 87 | 0  | 0   | 6  | 9.65  | 2  | ***     | [a:h:b]        |
| 733 | B09        | AhTE0852      | 111 | 0  | 0  | 83 | 0   | 1  | 8.33  | 1  | ****    | [a:h+b+c]      |
| 734 | B09        | AhTE0913      | 102 | 0  | 0  | 92 | 0   | 1  | 2.53  | 1  | -       | [a:h+b+c]      |
| 735 | B09        | AhTE0696      | 110 | 0  | 0  | 85 | 0   | 0  | 7.12  | 1  | ***     | [a:h+b+c]      |
| 736 | B09        | AGGS1654      | 94  | 2  | 91 | 0  | 0   | 8  | 8.62  | 2  | **      | [a:h:b]        |
| 737 | B09        | AGGS1569      | 84  | 0  | 93 | 0  | 0   | 18 | 12.29 | 2  | ****    | [a:h:b]        |
| 738 | B09        | AGGS1013      | 107 | 0  | 87 | 0  | 0   | 1  | 15.13 | 2  | *****   | [a:h:b]        |
| 739 | B10        | AHTE0874      | 109 | 0  | 0  | 86 | 0   | 0  | 6.37  | 1  | **      | [a:h+b+c]      |
| 740 | B10        | AGGS1431      | 79  | 9  | 89 | 0  | 0   | 18 | 1.01  | 2  | -       | [a:h:b]        |
| 741 | B10        | AGGS0815      | 104 | 0  | 91 | 0  | 0   | 0  | 13.92 | 2  | *****   | [a:h:b]        |

| Nr  | Chromosome | Locus      | a   | h  | b   | c  | d | -  | X2    | Df | Signif. | Classification |
|-----|------------|------------|-----|----|-----|----|---|----|-------|----|---------|----------------|
| 742 | B10        | GM2032     | 93  | 11 | 84  | 0  | 0 | 7  | 0.51  | 2  | -       | [a:h:b]        |
| 743 | B10        | GM2165     | 90  | 9  | 88  | 0  | 0 | 8  | 0.68  | 2  | -       | [a:h:b]        |
| 744 | B10        | IPAHM475   | 94  | 0  | 98  | 0  | 0 | 3  | 12.89 | 2  | ****    | [a:h:b]        |
| 745 | B10        | AGGS1728   | 95  | 0  | 95  | 0  | 0 | 5  | 12.67 | 2  | ****    | [a:h:b]        |
| 746 | B10        | EE16       | 101 | 5  | 85  | 0  | 0 | 4  | 5.73  | 2  | *       | [a:h:b]        |
| 747 | B10        | AGGS2576   | 98  | 8  | 86  | 0  | 0 | 3  | 2.22  | 2  | -       | [a:h:b]        |
| 748 | B10        | AHGS1446   | 90  | 10 | 89  | 0  | 0 | 6  | 0.3   | 2  | -       | [a:h:b]        |
| 749 | B10        | AHGS1669   | 97  | 8  | 88  | 0  | 0 | 2  | 1.91  | 2  | -       | [a:h:b]        |
| 750 | B10        | AHGA214492 | 95  | 5  | 82  | 0  | 0 | 13 | 4.8   | 2  | *       | [a:h:b]        |
| 751 | B10        | AHGS2543   | 98  | 8  | 87  | 0  | 0 | 2  | 2.13  | 2  | -       | [a:h:b]        |
| 752 | B10        | GNB0486    | 104 | 7  | 79  | 0  | 0 | 5  | 5.64  | 2  | *       | [a:h:b]        |
| 753 | B10        | AGGS1355   | 90  | 3  | 96  | 0  | 0 | 6  | 7.22  | 2  | **      | [a:h:b]        |
| 754 | B10        | AGGS1194   | 105 | 1  | 77  | 0  | 0 | 12 | 14.73 | 2  | *****   | [a:h:b]        |
| 755 | B10        | AGGS1312   | 99  | 13 | 80  | 0  | 0 | 3  | 2.09  | 2  | -       | [a:h:b]        |
| 756 | B10        | Ai10B6334  | 76  | 8  | 109 | 0  | 0 | 2  | 7.48  | 2  | **      | [a:h:b]        |
| 757 | B10        | AGGS1243   | 97  | 13 | 81  | 0  | 0 | 4  | 1.53  | 2  | -       | [a:h:b]        |
| 758 | B10        | AHGS0300   | 98  | 10 | 79  | 0  | 0 | 8  | 2.32  | 2  | -       | [a:h:b]        |
| 759 | B10        | AhTE0718   | 101 | 0  | 0   | 94 | 0 | 0  | 1.9   | 1  | -       | [a:h+b+c]      |
| 760 | B10        | AGGS0302   | 97  | 11 | 84  | 0  | 0 | 3  | 1.03  | 2  | -       | [a:h:b]        |
| 761 | B10        | AhTE0761   | 125 | 0  | 0   | 70 | 0 | 0  | 23.24 | 1  | *****   | [a:h+b+c]      |
| 762 | B10        | AGGS1160   | 102 | 2  | 82  | 0  | 0 | 9  | 10.79 | 2  | ****    | [a:h:b]        |
| 763 | B10        | AHGS1602   | 107 | 4  | 75  | 0  | 0 | 9  | 11.21 | 2  | ****    | [a:h:b]        |
| 764 | B10        | AGGS1118   | 112 | 3  | 79  | 0  | 0 | 1  | 13.31 | 2  | ****    | [a:h:b]        |
| 765 | B10        | AGGS1076   | 103 | 6  | 83  | 0  | 0 | 3  | 5.42  | 2  | *       | [a:h:b]        |
| 766 | B10        | GNB38      | 111 | 4  | 76  | 0  | 0 | 4  | 12.47 | 2  | ****    | [a:h:b]        |
| 767 | B10        | AHGS1275   | 93  | 19 | 81  | 0  | 0 | 2  | 5.05  | 2  | *       | [a:h:b]        |
| 768 | B10        | AhTE0893   | 112 | 0  | 0   | 83 | 0 | 0  | 8.73  | 1  | ****    | [a:h+b+c]      |
| 769 | B10        | Ai10B10082 | 99  | 4  | 86  | 0  | 0 | 6  | 6.47  | 2  | **      | [a:h:b]        |
| 770 | B10        | AGGS0333   | 106 | 0  | 88  | 0  | 0 | 1  | 14.71 | 2  | *****   | [a:h:b]        |
| 771 | B10        | AGGS1124   | 105 | 0  | 89  | 0  | 0 | 1  | 14.34 | 2  | *****   | [a:h:b]        |
| 772 | B10        | AGGS2262   | 98  | 11 | 76  | 0  | 0 | 10 | 2.82  | 2  | -       | [a:h:b]        |
| 773 | B10        | AHGS1595   | 86  | 1  | 105 | 0  | 0 | 3  | 12.76 | 2  | ****    | [a:h:b]        |
| 774 | B10        | Ai10B12455 | 88  | 0  | 104 | 0  | 0 | 3  | 14.22 | 2  | *****   | [a:h:b]        |
| 775 | B10        | AGGS0675   | 108 | 0  | 86  | 0  | 0 | 1  | 15.59 | 2  | *****   | [a:h:b]        |
| 776 | B10        | AhTE0162   | 90  | 0  | 105 | 0  | 0 | 0  | 14.23 | 2  | *****   | [a:h:b]        |
| 777 | B10        | AGGS2224   | 92  | 7  | 77  | 0  | 0 | 19 | 2.92  | 2  | -       | [a:h:b]        |
| 778 | B10        | AHGS2073   | 96  | 5  | 94  | 0  | 0 | 0  | 4.54  | 2  | -       | [a:h:b]        |
| 779 | B10        | AGGS0627   | 96  | 3  | 92  | 0  | 0 | 4  | 7.23  | 2  | **      | [a:h:b]        |
| 780 | B10        | AHGS1395   | 95  | 4  | 95  | 0  | 0 | 1  | 5.81  | 2  | *       | [a:h:b]        |
| 781 | B10        | AhTE0359   | 108 | 3  | 84  | 0  | 0 | 0  | 10.54 | 2  | ***     | [a:h:b]        |
| 782 | B10        | AHGA178360 | 90  | 5  | 96  | 0  | 0 | 4  | 4.5   | 2  | -       | [a:h:b]        |
| 783 | B10        | AGGS1795-2 | 105 | 5  | 84  | 0  | 0 | 1  | 6.89  | 2  | **      | [a:h:b]        |
| 784 | B10        | Ai10B9706  | 97  | 8  | 89  | 0  | 0 | 1  | 1.85  | 2  | -       | [a:h:b]        |
| 785 | B10        | AHGS1626   | 98  | 11 | 84  | 0  | 0 | 2  | 1.18  | 2  | -       | [a:h:b]        |
| 786 | B10        | AGGS1442   | 91  | 11 | 88  | 0  | 0 | 5  | 0.12  | 2  | -       | [a:h:b]        |
| 787 | B10        | AHGS2191   | 84  | 12 | 87  | 0  | 0 | 12 | 0.08  | 2  | -       | [a:h:b]        |
| 788 | B10        | AGGS1639   | 92  | 13 | 85  | 0  | 0 | 5  | 0.39  | 2  | -       | [a:h:b]        |
| 789 | B10        | AHGS1564   | 92  | 15 | 87  | 0  | 0 | 1  | 0.86  | 2  | -       | [a:h:b]        |
| 790 | B10        | AGGS1359   | 93  | 13 | 80  | 0  | 0 | 9  | 1.14  | 2  | -       | [a:h:b]        |
| 791 | B10        | AGGS2371   | 94  | 14 | 85  | 0  | 0 | 2  | 0.78  | 2  | -       | [a:h:b]        |
| 792 | B10        | AGGS2535   | 90  | 16 | 84  | 0  | 0 | 5  | 1.73  | 2  | -       | [a:h:b]        |
| 793 | B10        | AHGS1696   | 88  | 13 | 83  | 0  | 0 | 11 | 0.35  | 2  | -       | [a:h:b]        |
| 794 | B10        | AGGS2564   | 91  | 16 | 86  | 0  | 0 | 2  | 1.51  | 2  | -       | [a:h:b]        |

| Nr  | Chromosome | Locus      | a   | h  | b  | c  | d | -  | X2    | Df | Signif. | Classification |
|-----|------------|------------|-----|----|----|----|---|----|-------|----|---------|----------------|
| 795 | B10        | AGGS2407   | 87  | 16 | 79 | 0  | 0 | 13 | 2.38  | 2  | -       | [a:h:b]        |
| 796 | B10        | AHGA75538  | 100 | 12 | 80 | 0  | 0 | 3  | 2.22  | 2  | -       | [a:h:b]        |
| 797 | B10        | AHGS2787   | 96  | 14 | 81 | 0  | 0 | 4  | 1.64  | 2  | -       | [a:h:b]        |
| 798 | B10        | PM675      | 90  | 12 | 80 | 0  | 0 | 13 | 0.62  | 2  | -       | [a:h:b]        |
| 799 | B10        | Ai04B17746 | 100 | 7  | 75 | 0  | 0 | 13 | 5.46  | 2  | *       | [a:h:b]        |
| 800 | B10        | AGGS1307   | 102 | 3  | 87 | 0  | 0 | 3  | 8.45  | 2  | **      | [a:h:b]        |
| 801 | B10        | AGGS1393   | 93  | 16 | 84 | 0  | 0 | 2  | 1.82  | 2  | -       | [a:h:b]        |
| 802 | B10        | AHGA72558  | 77  | 14 | 87 | 0  | 0 | 17 | 1.39  | 2  | -       | [a:h:b]        |
| 803 | B10        | AGGS0058   | 87  | 5  | 90 | 0  | 0 | 13 | 3.86  | 2  | -       | [a:h:b]        |
| 804 | B10        | AGGS0617   | 97  | 8  | 86 | 0  | 0 | 4  | 2.06  | 2  | -       | [a:h:b]        |
| 805 | B10        | AHGS1903   | 96  | 4  | 87 | 0  | 0 | 8  | 5.86  | 2  | *       | [a:h:b]        |
| 806 | B10        | Ad10A15687 | 92  | 13 | 81 | 0  | 0 | 9  | 0.87  | 2  | -       | [a:h:b]        |
| 807 | B10        | AGGS0429   | 95  | 1  | 83 | 0  | 0 | 16 | 10.75 | 2  | ****    | [a:h:b]        |
| 808 | B10        | AhTE0709   | 109 | 0  | 0  | 86 | 0 | 0  | 6.37  | 1  | **      | [a:h+b+c]      |
| 809 | B10        | GA156      | 97  | 11 | 85 | 0  | 0 | 2  | 0.9   | 2  | -       | [a:h:b]        |
| 810 | B10        | AGGS2368   | 89  | 13 | 84 | 0  | 0 | 9  | 0.32  | 2  | -       | [a:h:b]        |
| 811 | B10        | AGGS2494   | 95  | 16 | 81 | 0  | 0 | 3  | 2.51  | 2  | -       | [a:h:b]        |
| 812 | B10        | Ai08B8719  | 89  | 16 | 84 | 0  | 0 | 6  | 1.72  | 2  | -       | [a:h:b]        |
| 813 | B10        | AHGA195553 | 92  | 9  | 93 | 0  | 0 | 1  | 0.86  | 2  | -       | [a:h:b]        |
| 814 | B10        | AGGS1425   | 99  | 1  | 91 | 0  | 0 | 4  | 11.05 | 2  | ****    | [a:h:b]        |
| 815 | B10        | AHGA61572  | 90  | 13 | 85 | 0  | 0 | 7  | 0.28  | 2  | -       | [a:h:b]        |
| 816 | B10        | AGGS1579   | 90  | 0  | 87 | 0  | 0 | 18 | 11.85 | 2  | ****    | [a:h:b]        |
| 817 | B10        | pPGPseq7H6 | 85  | 12 | 80 | 0  | 0 | 18 | 0.24  | 2  | -       | [a:h:b]        |
| 818 | B10        | AHGA61563  | 97  | 0  | 95 | 0  | 0 | 3  | 12.82 | 2  | ****    | [a:h:b]        |
| 819 | B10        | AhTE0918   | 113 | 0  | 0  | 81 | 0 | 1  | 10.08 | 1  | ****    | [a:h+b+c]      |
| 820 | B10        | AHGS3715   | 96  | 12 | 81 | 0  | 0 | 6  | 1.27  | 2  | -       | [a:h:b]        |
| 821 | B10        | AGGS1453   | 98  | 8  | 78 | 0  | 0 | 11 | 3.46  | 2  | -       | [a:h:b]        |
| 822 | B10        | AhM062     | 109 | 13 | 72 | 0  | 0 | 1  | 7.59  | 2  | **      | [a:h:b]        |
| 823 | B10        | AGGS2555   | 115 | 0  | 0  | 77 | 0 | 3  | 13.07 | 1  | *****   | [a:h+b+c]      |
| 824 | B10        | AHGA75537  | 98  | 11 | 81 | 0  | 0 | 5  | 1.69  | 2  | -       | [a:h:b]        |
| 825 | B10        | AhTE0586   | 87  | 9  | 98 | 0  | 0 | 1  | 1.52  | 2  | -       | [a:h:b]        |
| 826 | B10        | GNB320     | 104 | 11 | 78 | 0  | 0 | 2  | 3.84  | 2  | -       | [a:h:b]        |
| 827 | B10        | Ad10A18338 | 86  | 9  | 95 | 0  | 0 | 5  | 1.2   | 2  | -       | [a:h:b]        |
| 828 | B10        | AHGA72569  | 89  | 9  | 94 | 0  | 0 | 3  | 0.94  | 2  | -       | [a:h:b]        |
| 829 | B10        | AT79       | 95  | 10 | 88 | 0  | 0 | 2  | 0.65  | 2  | -       | [a:h:b]        |
| 830 | B10        | AHTE0006   | 126 | 1  | 68 | 0  | 0 | 0  | 29.36 | 2  | *****   | [a:h:b]        |
