# Supplementary material for: Development of SSR markers and identification of major quantitative trait loci controlling shelling percentage in cultivated peanut (Arachis hypogaea L.)
Source: PubMed Central journal article supplement (PMC5511596; doi:10.1007/s00122-017-2915-3), 2017-05-15
Supplement: 122_2017_2915_MOESM6_ESM.pdf [file 122_2017_2915_MOESM6_ESM.pdf]

**Table S6 Genetic linkage map constructed based on 830 polymorphic loci in the RIL population.**

-Chromosome A01

|            |        |
|------------|--------|
| AHGS1930   | 0      |
| AhTE0800   | 2.349  |
| AGGS2728   | 3.039  |
| AHGS1650   | 6.647  |
| AhTE0725   | 8.896  |
| AhTE0795   | 11.716 |
| AhTE0994   | 13.118 |
| AGGS0300   | 14.867 |
| AGGS1840   | 15.374 |
| AGGS1572   | 16.366 |
| AGGS1451   | 17.383 |
| AhTE0678   | 18.694 |
| AGGS0005   | 19.906 |
| AhTE0233-2 | 20.291 |
| AGGS2508   | 20.571 |
| AGGS1064   | 20.866 |
| GA110      | 21.468 |
| AGGS2317   | 21.78  |
| AHGS1294   | 21.901 |
| Ad01A11348 | 22.379 |
| AHGA374228 | 22.504 |
| AhTE0233-1 | 22.655 |
| AGGS1213   | 23.052 |
| AGGS0331   | 23.266 |
| AHGA329002 | 23.365 |
| AHGA367823 | 23.541 |
| ARS731     | 23.652 |
| AHGA171408 | 23.786 |
| AHGA164448 | 23.894 |
| AHGA375182 | 23.977 |
| AGGS2030   | 24.006 |
| AHGS1974   | 24.07  |
| AHGS1910   | 24.135 |
| Ad01A8169  | 24.155 |
| AHGS1666   | 24.5   |
| AGGS1615   | 24.816 |
| AGGS1005   | 25.113 |
| AGGS2121   | 25.334 |
| AGGS0940   | 25.639 |
| AGGS2701   | 25.875 |
| AHGS1465   | 26.303 |
| AGGS1885   | 26.647 |
| AHGS1459   | 26.838 |
| Ad01A8152  | 27.112 |

|             |        |
|-------------|--------|
| GM2807      | 27.489 |
| AHGA284837  | 27.723 |
| pPGSSeq19C3 | 28.835 |
| Ad05A18337  | 29.553 |
| AGGS0060    | 30.068 |
| Ai01B7542-2 | 30.865 |
| AhTE0914    | 31.848 |
| AHGS1846    | 32.701 |
| AGGS0633    | 33.766 |
| TC4G05      | 34.345 |
| AhTE0635    | 38.074 |
| AGGS1979    | 38.211 |
| AHGS0122    | 39.279 |
| AHGS1668    | 39.324 |
| TC23F04     | 41.047 |
| AHGS2559    | 42.346 |
| AHGS2429    | 42.599 |
| AHGS2084    | 44.834 |
| AHGS0201    | 49.556 |
| AGGS1954    | 58.046 |
| AHGS0729-3  | 58.695 |
| AGGS0694    | 63.414 |
| AGGS1014    | 65.171 |
| GM1839      | 70.829 |
| AhTE0986    | 75.236 |
| pPGPSeq3E5  | 80.23  |

-Chromosome A02

|            |        |
|------------|--------|
| Ad02A16744 | 0      |
| Ad02A10600 | 11.049 |
| Ad02A12962 | 13.767 |
| GNB218     | 15.949 |
| AHGS1987   | 18.98  |
| Ad02A4136  | 20.981 |
| Ai06B13545 | 21.821 |
| Ad02A4133  | 23.339 |
| AGGS1635   | 25.674 |
| pPGPseq1B9 | 27.859 |
| AGGS1356   | 29.918 |

-Chromosome A03

|          |        |
|----------|--------|
| AHGS1855 | 0      |
| AHGS1674 | 15.02  |
| AHGS1466 | 24.934 |
| AHGS1338 | 26.017 |
| AGGS1596 | 27.574 |

|            |        |
|------------|--------|
| AHGS1340   | 28.137 |
| Ad03A9257  | 30.709 |
| AhTE0164   | 32.129 |
| Ad06A5393  | 37.986 |
| AHGS2005   | 43.109 |
| AGGS1321   | 57.303 |
| AHGA96466  | 60.893 |
| AHGA96458  | 62.998 |
| AHGA96464  | 63.98  |
| Ai05B9660  | 65.024 |
| Ai03B32338 | 76.891 |

-Chromosome A04

|                |        |
|----------------|--------|
| AGGS0396-1     | 0      |
| pPGSseq15C12-2 | 2.503  |
| Ad04A21094     | 8.275  |
| AGGS1211       | 13.053 |
| GM2313         | 15.794 |
| AhTE0422       | 20.47  |

-Chromosome A05

|              |        |
|--------------|--------|
| AGGS2387     | 0      |
| AGGS1589     | 3.67   |
| AHGS1143     | 8.506  |
| Ai08B23999   | 9.346  |
| Ad05A20734   | 10.694 |
| Ai06B7451    | 14.602 |
| Ad05A19912   | 18.216 |
| Ad05A20509   | 19.891 |
| AGGS1233     | 21.799 |
| Ad05A20782   | 22.665 |
| Ad05A20533   | 23.273 |
| Ad05A20875   | 24.744 |
| Ad05A20801   | 25.111 |
| Ad05A20785   | 25.195 |
| Ad05A20677   | 25.439 |
| Ad05A20769   | 25.824 |
| Ad05A20650   | 26.348 |
| Ad05A20643-2 | 26.791 |
| Ad05A20570   | 27.087 |
| Ad05A20396   | 27.48  |
| Ad05A20499   | 28.212 |
| Ad05A20262   | 29.469 |
| Ad05A20012   | 29.872 |
| Ad05A19999   | 30.734 |
| Ad05A20084   | 31.343 |

|            |        |
|------------|--------|
| Ad05A20046 | 31.798 |
| AGGS1542   | 32.216 |
| Ad05A19382 | 33.578 |
| Ad05A19315 | 34.122 |
| Ad05A19473 | 34.365 |
| Ad05A19487 | 34.602 |
| Ad05A19295 | 35.292 |
| Ad05A19296 | 35.652 |
| Ad05A19142 | 37.061 |
| Ad05A19096 | 37.462 |
| Ad05A19116 | 38.269 |
| Ad05A19190 | 38.507 |
| Ad05A19710 | 39.367 |
| Ad05A18820 | 39.854 |
| Ad05A18734 | 40.34  |
| Ad05A18845 | 40.906 |
| AhTE0523   | 41.531 |
| Ad05A18493 | 42.577 |
| Ad05A18569 | 42.749 |
| Ad05A18924 | 43.693 |
| Ad05A18658 | 44.343 |
| Ad05A19203 | 45.549 |
| Ad05A18727 | 45.941 |
| AhTE0470   | 46.363 |
| Ad05A18501 | 46.972 |
| Ad02A180   | 47.911 |
| Ad05A18961 | 48.408 |
| Ad05A18695 | 49.409 |
| Ad02A182   | 50.744 |
| Ad05A18275 | 52.394 |
| AhTE0278   | 52.95  |
| Ad05A18425 | 53.747 |
| Ad05A18453 | 54.661 |
| Ad05A17280 | 56.484 |
| Ai06B29598 | 58.556 |
| AGGS0738   | 59.257 |
| Ad05A14690 | 60.561 |
| AhTE0820   | 61.142 |
| AHGS1813   | 62.673 |
| AGGS1518   | 64.004 |
| AHGS2644   | 65.408 |
| AhTE0005   | 66.122 |
| AHGS1245   | 66.71  |
| GM630      | 67.619 |
| AHGS2159   | 68.908 |
| Ad05A20222 | 69.628 |
| AGGS2124   | 70.836 |
| Ah426      | 71.21  |

|              |        |
|--------------|--------|
| Ad05A10356   | 72.252 |
| AGGS2746     | 72.739 |
| Ai07B23662-1 | 73.168 |
| AGGS1656     | 73.664 |
| ARS702       | 73.808 |
| AHGS1440-2   | 75.056 |
| AHGS1850     | 75.778 |
| AGGS2177     | 76.308 |
| Ad05A5618    | 77.615 |
| ARS715       | 78.284 |
| Ad05A19823   | 79.047 |
| AhTE0148     | 79.967 |
| AGGS1403     | 80.74  |
| AHGS2534     | 81.545 |
| AHGA44674    | 82.051 |
| PM65         | 82.856 |
| GNB138       | 83.507 |
| AhTE0553-1   | 83.713 |
| pPGPSeq2F10  | 84.645 |
| AGGS1167     | 85.817 |
| AGGS1187     | 86.366 |
| AHGS1806     | 86.915 |
| Ad05A8309    | 87.719 |
| AhTE0540     | 89.251 |
| AGGS0346     | 90.177 |
| AGGS2187     | 91.33  |
| AGGS1700     | 91.851 |
| Ad05A20617   | 93.53  |
| AGGS2372     | 94.542 |
| AhTE0810     | 95.093 |
| AC1D11       | 95.877 |
| AT43         | 98.028 |
| AHGS1507     | 101.67 |
| AhTE0839     | 102.97 |
| PM36-2       | 105.34 |
| AhTE0711     | 107.97 |
| AGGS1629     | 110.81 |

-Chromosome A06

|            |        |
|------------|--------|
| AT68       | 0      |
| AGGS0978   | 12.273 |
| Ai06B19288 | 13.547 |
| TC7C06     | 14.142 |
| AGGS0720   | 14.829 |
| AGGS750    | 16.187 |
| AHGS0153   | 16.76  |
| AGGS1479   | 17.531 |

|            |        |
|------------|--------|
| TC9C06     | 18.077 |
| Ad06A10649 | 19.328 |
| GNB87      | 19.887 |
| AGGS2082   | 20.652 |
| AGGS1953   | 21.256 |
| AHGA193642 | 21.579 |
| AGGS1450   | 21.81  |
| GNB877     | 22.159 |
| GNB329     | 22.998 |
| GNB1040-1  | 23.567 |
| EE51       | 24.123 |
| AGGS1773   | 24.675 |
| AGGS1932   | 25.695 |
| TC1A02     | 26.789 |
| TC11A04    | 29.15  |
| Ad06A16982 | 33.762 |
| Ad06A17247 | 35.048 |
| PM377      | 50.354 |

-Chromosome A07

|            |        |
|------------|--------|
| AGGS1365   | 0      |
| AhTE0478   | 5.459  |
| AHGA102053 | 8.096  |
| AHGS1296   | 9.863  |
| AGGS2556   | 13.542 |
| Ad06A4196  | 17.278 |
| IPAHM123   | 17.843 |
| TC9H08     | 18.527 |
| Ad07A4990  | 19.137 |
| PM204      | 19.828 |
| GM1937     | 20.534 |
| Ad07A9745  | 20.985 |
| AHGS2153   | 21.412 |
| AGGS1389   | 21.781 |
| AHGS1475   | 21.934 |
| AGGS1987   | 22.398 |
| AHGS1980   | 22.52  |
| AHGS1954   | 22.542 |
| AGGS1568   | 22.985 |
| AHGS1692   | 23.35  |
| AHGA65328  | 24.288 |
| AGGS1638   | 25.071 |
| AGGS0187   | 26.765 |
| AHGS2413   | 28.638 |
| AhTE0706   | 29.57  |
| AHGS1189   | 30.289 |
| TC41A10    | 30.595 |

|            |        |
|------------|--------|
| AGGS1662   | 31.355 |
| AHGS0346   | 32.065 |
| AHGS0147   | 32.389 |
| AHGS1266   | 33.804 |
| AGGS1585   | 34.191 |
| AHGS2754   | 36.055 |
| AHGS1913   | 36.67  |
| AGGS2061   | 37.543 |
| Ad04A10156 | 38.592 |
| AGGS1577   | 41.502 |
| AHGS0274   | 44.714 |
| AGGS2261   | 46.473 |

-Chromosome A08

|            |        |
|------------|--------|
| AGGS0337   | 0      |
| AGGS1466   | 12.729 |
| AHGS1574   | 15.397 |
| Ai07B26726 | 42.385 |
| Ad08A3453  | 45.354 |
| AhTE0690   | 46.81  |
| AHGS2319   | 49.275 |
| Ad08A4387  | 52.376 |
| AGGS2027   | 52.676 |
| AHGS1434   | 53.426 |
| AGGS1495   | 54.002 |
| GM1713     | 55.3   |
| Ad08A4940  | 58.584 |
| AHGS1687   | 61.626 |
| pPGPseq2G3 | 61.937 |
| AHGA361225 | 64.304 |
| GM1901     | 66.626 |

-Chromosome A09

|          |        |
|----------|--------|
| AHTE0840 | 0      |
| AGGS2745 | 0.14   |
| AGGS2744 | 3.98   |
| AGGS1003 | 10.228 |
| AGGS1925 | 13.131 |
| AHGS1208 | 14.485 |
| AGGS1432 | 15.68  |
| GNB159   | 16.121 |
| AGGS0385 | 16.596 |
| AHGS0422 | 17.107 |
| AhTE0808 | 17.494 |
| AGGS1498 | 18.19  |
| AGGS1137 | 18.867 |

|            |        |
|------------|--------|
| AGGS1317   | 19.474 |
| AGGS1193   | 19.716 |
| GM2839     | 20.053 |
| EM87       | 20.724 |
| AhTE0726   | 20.947 |
| AHGS0400   | 21.205 |
| AGGS1438   | 21.423 |
| AHGS1319   | 21.884 |
| AGGS2134   | 22.072 |
| Ad09A10442 | 22.971 |
| AHGS1543   | 23.39  |
| AHGS1126   | 23.613 |
| Ad09A5979  | 23.893 |
| Ad09A6009  | 24.041 |
| Ad09A6680  | 24.07  |
| AhTE0303   | 24.152 |
| Ad09A6617  | 24.286 |
| Ad09A6594  | 24.353 |
| Ad09A7483  | 24.38  |
| Ad09A7532  | 24.453 |
| GNB136     | 24.508 |
| Ad09A6154  | 24.675 |
| Ad09A7328  | 24.885 |
| Ad09A6072  | 24.976 |
| AHGA7048   | 25.214 |
| Ad09A6233  | 25.387 |
| AGGS1378   | 25.657 |
| AGGS0449   | 25.78  |
| AHGA98575  | 26.247 |
| AGGS0957   | 26.538 |
| Ad09A7577  | 26.887 |
| AGGS1606   | 27.189 |
| AHGA98567  | 27.348 |
| Ad91I24    | 27.591 |
| AHGS2130   | 27.732 |
| AGGS2492   | 27.919 |
| GNB652     | 28.379 |
| AHGS1683   | 29.034 |
| Ad09A6425  | 29.351 |
| AGGS0389   | 29.952 |
| AHGS1283   | 30.439 |
| AGGS2572   | 30.751 |
| AGGS0977   | 31.288 |
| AGGS0285   | 31.991 |
| Ad09A3779  | 32.899 |
| GNB377     | 35.009 |
| AGGS2438   | 36.495 |
| AhTE0283   | 38.428 |



|            |        |
|------------|--------|
| ARS742     | 39.331 |
| AHGS0344   | 39.53  |
| Ad10A10685 | 44.531 |
| AhTE0922   | 50.811 |
| AhTE0794   | 54.35  |
| AhTE0381   | 58.997 |
| AGGS2380   | 66.448 |
| AhTE0888   | 68.87  |
| AhTE0707   | 71.777 |
| AhTE0815   | 74.433 |
| AhTE0532   | 84.346 |
| AGGS0100   | 92.928 |

-Chromosome A10

|          |        |
|----------|--------|
| AhTE0524 | 0      |
| AGGS1283 | 7.35   |
| AhTE0797 | 13.782 |

-Chromosome B01

|              |        |
|--------------|--------|
| GA1          | 0      |
| AHGS1098     | 13.423 |
| AGGS2325     | 17.86  |
| AHGS0108     | 22.278 |
| AHTE0845     | 23.291 |
| AGGS0281     | 27.658 |
| Ad05A20112   | 38.661 |
| Ai07B23662-2 | 42.451 |
| AHTE0674     | 42.778 |
| Ai01B7136    | 44.854 |
| AHGA364915   | 47.57  |
| AHGA364936   | 48.211 |
| AhTE0021     | 48.768 |
| AGGS0408     | 50.309 |
| AHGS0729-2   | 52.852 |
| AhTE0489     | 53.483 |
| AGGS0833     | 53.913 |
| AGGS2567     | 54.581 |
| AhTE0565     | 54.866 |
| AHGS2027     | 55.428 |
| AGGS700      | 55.659 |
| Ai01B11694   | 56.157 |
| AHGS1670     | 56.521 |
| AHGA25786    | 56.85  |
| AGGS0960     | 57.067 |
| AGGS0440     | 57.676 |
| AhTE0771     | 58.108 |

|             |        |
|-------------|--------|
| AhTE0536    | 58.785 |
| Ad10A4720   | 59.214 |
| AHGS1524    | 59.643 |
| AHGS1462    | 60.123 |
| AGGS1363    | 60.298 |
| Ai01B8018   | 60.393 |
| AGGS2359    | 60.624 |
| AGGS1056    | 60.739 |
| AHGS1829    | 61.081 |
| AGGS1254    | 61.162 |
| AHGS2579    | 61.32  |
| AHGS1273    | 61.672 |
| AhTE0129    | 61.859 |
| AGGS1122    | 62.001 |
| Ai01B9867   | 62.339 |
| AGGS2580    | 62.558 |
| AGGS1612    | 62.788 |
| AHGS1369    | 63.084 |
| AHGS3627    | 63.422 |
| Ai01B7542-1 | 63.771 |
| AHGS2466    | 63.867 |
| AhTE0426    | 64.117 |
| AHGS1489    | 64.329 |
| AhTE0985    | 64.667 |
| AHGS1699    | 64.931 |
| AhTE0212    | 65.599 |
| AHGA24894   | 65.892 |
| TC23C08     | 66.489 |
| TC1A08      | 67.035 |
| AHGS1630    | 67.342 |
| AHGS1333    | 67.578 |
| TC27H12     | 67.958 |
| AHGS1246    | 68.377 |
| AHS0487     | 69.192 |
| AGGS1376    | 70.798 |
| AHGS1130    | 71.469 |
| AhTE0251    | 71.784 |
| AHGS1710    | 75.549 |
| AhTE0790    | 79.327 |
| GNB619      | 80.361 |
| AhTE1016    | 84.126 |
| AGGS2233    | 93.435 |

-Chromosome B02

|          |        |
|----------|--------|
| AHGS1522 | 0      |
| AhTE0818 | 13.04  |
| AHGS1278 | 17.898 |

|              |        |
|--------------|--------|
| Ai02B25100   | 21.108 |
| AGGS2092     | 23.832 |
| TC1E01       | 26.298 |
| GM2808       | 27.662 |
| Ai02B25013   | 30.021 |
| AhTE0887     | 33.778 |
| AhTE0825     | 34.307 |
| AGGS2532     | 36.124 |
| AHGS1232     | 38.193 |
| AGGS2393     | 38.905 |
| AHGA327396   | 40.393 |
| AGGS1400     | 41.428 |
| AHGS1426     | 42.625 |
| Ai02B4457    | 43.081 |
| AHGS1241     | 43.443 |
| Ai02B23281   | 44.068 |
| AGGS0297     | 45.439 |
| Ai02B20508   | 46.735 |
| AGGS2219     | 47.946 |
| Ai02B21538   | 49.101 |
| AHGS1818     | 49.975 |
| Ai02B21379   | 51.1   |
| Ai02B20641   | 52.152 |
| Ai02B20354   | 52.594 |
| AGGS1643     | 53.414 |
| AHGS1251     | 54.267 |
| Ai02B19680   | 54.809 |
| Ai02B21536-1 | 55.394 |
| AHGS1473     | 56.298 |
| AGGS2475     | 56.442 |
| Ai02B18857   | 57.325 |
| AGGS2019     | 58.233 |
| AHGS1845     | 58.242 |
| AGGS2228     | 58.954 |
| Ai02B17748   | 59.386 |
| Ah26         | 59.887 |
| pPGPSeq4E8   | 60.247 |
| AGGS1461     | 60.673 |
| AHGS1928     | 60.992 |
| AhTE0296     | 61.288 |
| AHGS1393     | 61.486 |
| Ai08B11147   | 61.637 |
| AGGS1238     | 61.889 |
| AHGS1530     | 62.096 |
| GNB1040-2    | 62.198 |
| Ai02B11533   | 62.328 |
| AHGA14239    | 62.498 |
| AHGS0429     | 63.047 |

|              |        |
|--------------|--------|
| AGGS1344     | 63.214 |
| AC2C05       | 63.539 |
| Ai02B7886    | 63.801 |
| AGGS1533     | 64.28  |
| Ai02B8654    | 64.541 |
| AGGS1484     | 64.904 |
| AGGS1678     | 65.234 |
| AhM022       | 65.842 |
| Ai02B7519    | 66.404 |
| AGGS0638     | 66.581 |
| Ai02B8213    | 67.138 |
| Ai02B21536-2 | 67.757 |
| AHGS1261     | 68.019 |
| AhTE0813     | 68.511 |
| AhTE0577     | 69.127 |
| TC1B02       | 70.094 |
| AHGS1853     | 70.355 |
| AGGS1532     | 70.896 |
| AGGS2332     | 71.49  |
| AGGS2195     | 71.994 |
| AGGS1468     | 72.519 |
| AHGS1805     | 73.201 |
| AGGS2413     | 73.457 |
| AhTE0791     | 74.508 |
| AGGS1325     | 74.793 |
| AHGS1419     | 75.669 |
| AGGS1592     | 76.737 |
| Ai02B4199    | 77.754 |
| Ai02B6837    | 79.136 |
| Ai02B2634    | 79.975 |
| Ai02B2534    | 81.363 |
| Ai02B2356    | 82.632 |
| AGGS0399     | 84.363 |
| Ai02B2350    | 85.876 |
| AHGS1940     | 86.48  |
| TC9F04       | 88.873 |
| AhTE0775     | 90.523 |
| AHGS2344     | 92.536 |
| GM2196       | 93.672 |
| Ai06B27638   | 96.022 |
| Ad02A625     | 108.91 |

-Chromosome B03

|            |        |
|------------|--------|
| GA27       | 0      |
| AHGS1176   | 5.887  |
| GM1996     | 13.305 |
| Ai08B16802 | 23.918 |

|          |        |
|----------|--------|
| AGGS1276 | 41.253 |
| AHGS1561 | 44.686 |
| AGGS1369 | 46.557 |
| GM1854   | 73.896 |

-Chromosome B04

|            |        |
|------------|--------|
| AGGS1671   | 0      |
| Ai04B16    | 5.498  |
| Ad04A21    | 9.973  |
| AGGS2384   | 16.831 |
| AhTE0654   | 20.661 |
| TC11H06    | 23.313 |
| AhTE0908   | 25.614 |
| AHGS1703   | 26.903 |
| AHGS2539   | 28.286 |
| EE22       | 33.263 |
| AHGA161495 | 35.378 |
| AHGA161468 | 38.79  |
| AHGA161510 | 40.161 |
| AhTE0659   | 41.931 |
| GM1445     | 42.712 |
| Ai04B2241  | 43.748 |
| AGGS1601   | 45.026 |
| AhTE0945   | 45.582 |
| AhTE0903   | 46.029 |
| AhTE0923   | 46.663 |
| AGGS1795-1 | 47.439 |
| AhTE0777   | 48.132 |
| AhTE0906   | 49.085 |
| AGGS1054   | 49.65  |
| Ai04B4849  | 50.119 |
| AhTE0882   | 50.525 |
| AhTE0936   | 51.077 |
| AhTE0416   | 51.442 |
| AHGS1552   | 51.691 |
| AhTE0237   | 51.935 |
| AGGS2488   | 52.384 |
| AGGS1783   | 52.842 |
| AHGS1617   | 53.189 |
| AHGS1579   | 53.439 |
| Ai06B31304 | 53.846 |
| Ai04B9397  | 54.155 |
| Ad05A20478 | 54.623 |
| AGGS1750   | 54.974 |
| AHGS1311   | 55.134 |
| AHGS0390   | 55.181 |
| AHGS0288   | 55.253 |

|                |        |
|----------------|--------|
| AGGS1370       | 55.477 |
| AhTE0335       | 55.702 |
| AGGS1101       | 55.971 |
| AGGS1324       | 56.528 |
| Ai04B19238     | 57.356 |
| AGGS734        | 58.113 |
| AhTE0261       | 58.469 |
| AGGS1512       | 59.049 |
| Ai04B5526      | 59.715 |
| GM2246         | 60.118 |
| pPGSseq17F6    | 61.239 |
| AGGS2251       | 62.237 |
| GM1959         | 63.369 |
| Ad04A12402     | 64.499 |
| PMc348         | 65.069 |
| AGGS1102       | 66.162 |
| Ai04B12763     | 66.891 |
| AGGS1613       | 67.947 |
| AhTE0191       | 69.438 |
| IPAHM105       | 69.679 |
| AGGS2135       | 70.975 |
| AGGS0284       | 71.058 |
| AHGS1773       | 72.241 |
| AHGS1937       | 74.458 |
| AGGS1621       | 80.584 |
| AHTE0189       | 81.813 |
| AhTE0959       | 84.784 |
| AhTE0639       | 85.736 |
| AhTE0107       | 88.229 |
| AGGS2509       | 89.762 |
| AhTE0796       | 91.916 |
| GM2106         | 93.32  |
| PMc660         | 97.142 |
| EM142          | 97.325 |
| pPGSseq15C12-1 | 100.32 |
| AGGS0396-2     | 101.86 |
| Ai04B20539     | 107.09 |
| AhTE1009       | 109.37 |
| AHGA176194     | 117.59 |
| Ah325          | 125.04 |

-Chromosome B05

|            |        |
|------------|--------|
| Ad05A19349 | 0      |
| AHGS1342   | 4.507  |
| Ai05B28050 | 9.856  |
| Ai05B32361 | 12.532 |
| GA72       | 19.59  |

|              |        |
|--------------|--------|
| Ad05A20643-1 | 21.869 |
| AhTE0756     | 22.317 |
| AHGS1770     | 23.936 |
| AGGS1183     | 25.824 |
| AGGS0673     | 29.648 |
| AhTE0806     | 33.38  |
| TC6E01       | 33.862 |
| Ad05A18236   | 34.384 |
| AGGS2147     | 34.46  |
| AHGA152194   | 37.414 |
| AHGA152207   | 39.473 |
| AGGS0973     | 39.873 |
| pPGSseq9G5   | 41.157 |
| AhTE0119     | 41.378 |
| AHGS1228     | 41.634 |
| AHGS1457     | 41.865 |
| IPAHM354     | 43.406 |
| pPGSseq15D6  | 44.161 |
| AhM082       | 44.613 |
| GM1555       | 45.833 |
| AGGS1632     | 47.426 |
| Ad05A19244   | 47.696 |
| Ai05B15046   | 47.997 |
| AHGS2568     | 48.515 |
| Ai05B26922   | 48.806 |
| Ai05B25638   | 49.634 |
| AGGS1299     | 49.821 |
| Ai05B19811   | 50.783 |
| AGGS0243     | 51.764 |
| AHGS1624     | 52.875 |
| AGGS1754     | 53.376 |
| AHGS2141     | 53.743 |
| AHGS1188     | 54.145 |
| AGGS2115     | 54.404 |
| AGGS1481     | 54.933 |
| AGGS1262     | 55.244 |
| AHGS1203     | 55.63  |
| AHGS2795     | 56.14  |
| AGGS0244     | 56.341 |
| AGGS1464     | 56.667 |
| Ai05B12077   | 57.288 |
| AGGS1691     | 57.59  |
| IPAHM282     | 58.018 |
| AHGS2195     | 58.559 |
| AGGS1645     | 59.049 |
| PM36-1       | 59.446 |
| AHGS1682     | 60.01  |
| TC5D01       | 60.344 |

|            |        |
|------------|--------|
| AHGS2509   | 60.873 |
| Ai03B33341 | 62.171 |
| Ad10A3962  | 62.875 |
| AGGS0979   | 64.074 |
| AHGS1497   | 64.943 |
| TC19E01    | 65.596 |
| AHGA221480 | 65.969 |
| AHGS1672   | 66.205 |
| AhTE0553-2 | 67.144 |
| AhTE0940   | 67.791 |
| AHGA44686  | 68.269 |
| AHGS1755   | 68.755 |
| AHGS0729-1 | 69.315 |
| AGGS2216   | 69.743 |
| AHGS1532   | 71.362 |
| AGGS2287   | 71.878 |
| AGGS0311   | 72.465 |
| AHGS1440-1 | 73.198 |
| AhTE0211   | 74.432 |
| AGGS0670   | 75.673 |
| AHGS2241   | 76.054 |
| Ad05A20185 | 76.992 |
| AGGS2398   | 77.353 |
| Ai05B5265  | 78.884 |
| AGGS2272   | 79.343 |
| AHGA363492 | 81.732 |
| IPAHM73    | 82.379 |
| AHGA363491 | 82.672 |
| ARS590     | 82.905 |
| AhTE0319   | 83.612 |
| AhTE0446   | 84.725 |
| AGGS0351   | 85.256 |
| AHGS1750   | 86.808 |
| AGGS0955   | 87.081 |
| GM1539     | 97.01  |

-Chromosome B06

|            |        |
|------------|--------|
| Ai06B32416 | 0      |
| Ai06B29716 | 20.444 |
| AHGS1267   | 27.104 |

-Chromosome B07

|             |        |
|-------------|--------|
| AGGS1513    | 0      |
| AGGS1620    | 2.272  |
| pPGSSeq13B7 | 31.179 |
| Ai07B12485  | 34.373 |



|          |        |
|----------|--------|
| AGGS2425 | 40.619 |
|----------|--------|

-Chromosome B08

|            |        |
|------------|--------|
| AhTE0477   | 0      |
| AGGS1197   | 13.349 |
| AHGS2602   | 15.79  |
| Ad90F2     | 16.766 |
| AhTE0658   | 19.526 |
| AHGS1470   | 21.101 |
| AGGS2186   | 22.94  |
| ML1G04     | 25.633 |
| Ai08B2682  | 29.97  |
| AhTE0824   | 34.779 |
| pPGPseq5D1 | 47.078 |

-Chromosome B09

|               |        |
|---------------|--------|
| AHGA161466    | 0      |
| Ai09B5213     | 22.538 |
| Ad10A4326     | 28.973 |
| AHBGSI1008H04 | 37.378 |
| AhTE0852      | 42.25  |
| AhTE0913      | 46.042 |
| AhTE0696      | 49.872 |
| AGGS1654      | 58.369 |
| AGGS1569      | 70.794 |
| AGGS1013      | 79.513 |

-Chromosome B10

|            |        |
|------------|--------|
| AHTE0874   | 0      |
| AGGS1431   | 14.105 |
| AGGS0815   | 14.648 |
| GM2032     | 17.945 |
| GM2165     | 19.265 |
| IPAHM475   | 21.772 |
| AGGS1728   | 23.627 |
| EE16       | 24.335 |
| AGGS2576   | 25.394 |
| AHGS1446   | 25.745 |
| AHGS1669   | 25.958 |
| AHGA214492 | 26.237 |
| AHGS2543   | 26.485 |
| GNB0486    | 28.654 |
| AGGS1355   | 29.563 |
| AGGS1194   | 31.849 |
| AGGS1312   | 33.421 |

|            |        |
|------------|--------|
| Ai10B6334  | 33.833 |
| AGGS1243   | 35.321 |
| AHGS0300   | 35.75  |
| AhTE0718   | 36.275 |
| AGGS0302   | 38.509 |
| AhTE0761   | 39.274 |
| AGGS1160   | 39.958 |
| AHGS1602   | 40.169 |
| AGGS1118   | 40.576 |
| AGGS1076   | 41.331 |
| GNB38      | 42.335 |
| AHGS1275   | 42.796 |
| AhTE0893   | 44.682 |
| Ai10B10082 | 45.308 |
| AGGS0333   | 45.577 |
| AGGS1124   | 46.058 |
| AGGS2262   | 46.476 |
| AHGS1595   | 46.887 |
| Ai10B12455 | 47.162 |
| AGGS0675   | 47.636 |
| AhTE0162   | 48.116 |
| AGGS2224   | 48.572 |
| AHGS2073   | 48.766 |
| AGGS0627   | 49.097 |
| AHGS1395   | 49.458 |
| AhTE0359   | 49.802 |
| AHGA178360 | 50.134 |
| AGGS1795-2 | 50.504 |
| Ai10B9706  | 50.642 |
| AHGS1626   | 50.792 |
| AGGS1442   | 50.981 |
| AHGS2191   | 51.217 |
| AGGS1639   | 51.641 |
| AHGS1564   | 51.814 |
| AGGS1359   | 51.956 |
| AGGS2371   | 52.069 |
| AGGS2535   | 52.238 |
| AHGS1696   | 52.343 |
| AGGS2564   | 52.771 |
| AGGS2407   | 53.285 |
| AHGA75538  | 53.784 |
| AHGS2787   | 53.948 |
| PM675      | 54.158 |
| Ai04B17746 | 54.493 |
| AGGS1307   | 55.491 |
| AGGS1393   | 55.767 |
| AHGA72558  | 56.221 |
| AGGS0058   | 56.798 |

|            |        |
|------------|--------|
| AGGS0617   | 57.069 |
| AHGS1903   | 57.685 |
| Ad10A15687 | 57.967 |
| AGGS0429   | 58.459 |
| AhTE0709   | 58.821 |
| GA156      | 59.962 |
| AGGS2368   | 60.455 |
| AGGS2494   | 60.634 |
| Ai08B8719  | 61.656 |
| AHGA195553 | 62.327 |
| AGGS1425   | 63.225 |
| AHGA61572  | 63.696 |
| AGGS1579   | 64.327 |
| pPGPseq7H6 | 64.791 |
| AHGA61563  | 65.928 |
| AhTE0918   | 68.391 |
| AHGS3715   | 68.585 |
| AGGS1453   | 69.769 |
| AhM062     | 69.99  |
| AGGS2555   | 70.881 |
| AHGA75537  | 71.692 |
| AhTE0586   | 72.839 |
| GNB320     | 74.658 |
| Ad10A18338 | 75.591 |
| AHGA72569  | 77.989 |
| AT79       | 85.903 |
| AHTE0006   | 105.11 |
