# Supplementary material for: Development of SSR markers and identification of major quantitative trait loci controlling shelling percentage in cultivated peanut (Arachis hypogaea L.)
Source: PubMed Central journal article supplement (PMC5511596; doi:10.1007/s00122-017-2915-3), 2017-05-15
Supplement: 122_2017_2915_MOESM7_ESM.pdf [file 122_2017_2915_MOESM7_ESM.pdf]

Table S7 Statistics analysis for shelling percentage in the progeny of a residual heterozygous line RIL 15-71126.

**a. Means of shelling percentage in the residual heterozygous lines**

| Genotype | Mean (%) | N  | Std. Deviation |
|----------|----------|----|----------------|
| A        | 78.45    | 5  | 2.04           |
| H        | 75.62    | 17 | 2.80           |
| B        | 72.82    | 9  | 2.79           |
| Total    | 75.27    | 31 | 3.22           |

**b. ANOVA of shelling percentage in the residual heterozygous lines**

|                | Sum of Squares | df | Mean Square | F     | Sig.  |
|----------------|----------------|----|-------------|-------|-------|
| Between Groups | 106.50         | 2  | 53.25       | 7.302 | 0.003 |
| Within Groups  | 204.19         | 28 | 7.29        |       |       |
| Total          | 310.69         | 30 |             |       |       |

**c. Multiple comparisons of shelling percentage in the residual heterozygous lines**

| Genotype | Mean (%) | 0.05 | 0.01 |
|----------|----------|------|------|
| A        | 78.45    | a    | A    |
| H        | 75.62    | b    | AB   |
| B        | 72.82    | c    | B    |

0.05 and 0.01 indicated the significance level
